# Supplementary material for: Real-time microbial growth curve (RMGC) system: an improved microplate reader with a graphical interface for automatic and high-throughput monitoring of microbial growth curves
Source: Royal Society of Chemistry journal article supplement (doi:10.1039/d4an01339e), 2025-01-01
Supplement: d4an01339e1.xlsx [file d4an01339e1.xlsx]

## Sheet:  OD-time curves of E. coli
DATA(x)	A1_DATA(y)	B1_DATA(y)	C1_DATA(y)	D1_DATA(y)	E1_DATA(y)	F1_DATA(y)	G1_DATA(y)	H1_DATA(y)	A2_DATA(y)	B2_DATA(y)	C2_DATA(y)	D2_DATA(y)	E2_DATA(y)	F2_DATA(y)	G2_DATA(y)	H2_DATA(y)	A3_DATA(y)	B3_DATA(y)	C3_DATA(y)	D3_DATA(y)	E3_DATA(y)	F3_DATA(y)	G3_DATA(y)	H3_DATA(y)	A4_DATA(y)	B4_DATA(y)	C4_DATA(y)	D4_DATA(y)	E4_DATA(y)	F4_DATA(y)	G4_DATA(y)	H4_DATA(y)	A5_DATA(y)	B5_DATA(y)	C5_DATA(y)	D5_DATA(y)	E5_DATA(y)	F5_DATA(y)	G5_DATA(y)	H5_DATA(y)	A6_DATA(y)	B6_DATA(y)	C6_DATA(y)	D6_DATA(y)	E6_DATA(y)	F6_DATA(y)	G6_DATA(y)	H6_DATA(y)	A7_DATA(y)
0	0	0	0	0	0	0	0	0	0	0	0	0	0	0	0	0	0	0	0	0	0	0	0	0	0	0	0	0	0	0	0	0	0	0	0	0	0	0	0	0	0	0	0	0	0	0	0	0	0
3	0	0	0	0	0	0.013	0.003	0.0015	0	0	0	0	0	0	0	0.0003	0.0018	0	0	0.0006	0	0	0.0035	0.001	0	0	0	0	0.0031	0.0009	0.0008	0.0041	0.0005	0	0.0009	0.0016	0	0	0.0003	0	0	0	0	0	0.0003	0.0004	0	0	0
7	0	0	0	0	0	0.0066	0.0052	0	0	0	0	0	0	0	0	0	0	0	0	0	0	0	0.0021	0.0002	0	0	0	0	0.0003	0	0	0	0	0	0	0	0	0	0	0	0	0	0	0	0	0	0.0098	0	0
11	0	0	0	0	0	0.0057	0.0049	0	0	0	0	0	0	0	0	0	0	0	0	0	0.0009	0.0009	0.0051	0.0054	0	0	0	0	0.0043	0	0.0001	0.0038	0	0	0	0	0	0	0	0	0	0	0	0	0	0	0	0	0
15	0	0	0	0	0	0.002	0.0048	0	0	0	0	0	0	0	0	0	0	0	0	0	0.0066	0.006	0.0096	0.0119	0	0	0	0	0.0039	0	0.0049	0.0033	0.0042	0	0.0016	0.0055	0	0	0	0	0	0	0	0	0	0	0	0	0
19	0	0	0	0.0014	0	0.0041	0.0045	0	0	0	0	0	0	0	0	0.0006	0.0011	0	0	0.0005	0	0	0.0019	0.0001	0	0	0	0	0.0042	0	0	0.0042	0.0051	0.0001	0.0021	0.0066	0	0	0	0	0	0	0	0	0	0	0	0	0
23	0	0	0	0.0004	0	0.0047	0.0043	0	0	0	0	0	0	0	0	0.0015	0.0003	0	0	0	0	0	0.0023	0.0018	0	0	0	0	0.0089	0.0043	0.004	0.0093	0	0	0	0.0005	0	0	0	0	0	0	0	0	0	0	0	0	0
27	0	0	0	0.003	0	0.0019	0.0063	0	0	0	0	0	0	0	0	0.0024	0	0	0	0	0.0008	0.0011	0.0083	0.0066	0	0	0	0	0.0043	0.0001	0.0007	0.0044	0	0	0	0.0013	0	0	0.0006	0.0004	0	0	0	0	0	0.0007	0.001	0	0
31	0	0	0	0.0007	0	0	0.0051	0	0	0	0	0	0	0	0	0	0	0	0	0	0	0.0012	0.0047	0.0053	0	0	0	0	0.008	0.0038	0.0128	0.0084	0	0	0	0.0009	0	0	0	0	0	0	0	0	0	0.0003	0	0	0
35	0	0	0	0.0005	0	0.0019	0.006	0	0	0	0	0	0	0	0	0.0027	0.0018	0	0	0.0015	0	0	0.0029	0.0021	0	0	0	0	0.0085	0.0043	0.0061	0.0095	0	0	0	0.0013	0	0	0	0.0002	0	0	0	0	0	0.0009	0	0	0
39	0	0	0	0.0009	0	0	0.0057	0	0	0	0	0	0	0	0	0.0027	0.002	0	0	0.0013	0.0008	0	0.0028	0.0036	0	0	0	0	0.0084	0.0042	0.0055	0.0092	0	0	0	0.0012	0	0	0.0002	0.0006	0	0	0	0	0	0.0013	0	0.0003	0
43	0	0	0	0.0021	0	0.008	0.0057	0	0	0	0	0	0	0	0	0.0016	0.0031	0	0	0.002	0	0	0.0026	0.0021	0	0	0	0	0.0083	0.0043	0.0059	0.0096	0	0	0	0.0009	0	0	0.0003	0.0007	0	0	0	0	0	0.0007	0	0	0
47	0	0	0	0.0029	0	0.0054	0.0056	0	0	0	0	0	0	0	0	0.0017	0.0032	0	0	0.0022	0	0	0.0029	0.0017	0	0	0	0	0.0091	0.0037	0.0165	0.0086	0	0	0	0.0011	0	0	0.0002	0.0013	0	0	0	0	0	0.0011	0	0	0
51	0.0005	0	0.0003	0.0051	0	0.0112	0.0073	0	0	0	0	0	0	0.0006	0	0.0029	0	0	0	0	0.0022	0.0032	0.0073	0.0092	0	0	0	0	0.0097	0.0057	0.0055	0.0109	0	0	0	0.0032	0.0018	0.0014	0.0025	0.0032	0	0	0	0	0.0016	0.0042	0.0011	0.0023	0
55	0	0	0	0.0037	0	0.0103	0.0075	0	0	0	0	0	0	0	0	0.0029	0.0038	0	0	0.0033	0	0	0.0045	0.0066	0	0	0	0	0.0103	0.0054	0.0126	0.0109	0	0	0	0.0028	0.0016	0.0008	0.0023	0.0034	0	0	0	0	0.0016	0.0041	0.0016	0.0019	0
59	0.0009	0	0.0002	0.0046	0	0.0126	0.0082	0	0	0	0	0.0022	0.0014	0.0006	0	0.0019	0.0058	0.0004	0.0028	0.0045	0	0.0004	0.0055	0.0053	0	0	0	0	0.0111	0.0067	0.0067	0.0123	0	0	0	0.0042	0.002	0.0015	0.0029	0.0038	0	0	0	0	0.0024	0.0046	0.0018	0.0027	0.0011
63	0.0009	0.0004	0.0002	0.0056	0.0004	0.0127	0.009	0.0005	0	0	0	0.0008	0.0021	0.0021	0.0001	0.005	0.0053	0.0008	0.0011	0.0051	0.0003	0.0015	0.0065	0.0065	0	0	0	0.0007	0.0114	0.0073	0.022	0.0125	0	0.0002	0	0.005	0.003	0.003	0.0042	0.0052	0	0	0	0	0.0035	0.0059	0.003	0.004	0.0011
67	0.0012	0	0.001	0.0056	0	0.0117	0.0084	0	0	0	0	0.0004	0.0014	0.0021	0	0.0034	0	0	0	0	0.0041	0.0042	0.0091	0.0111	0	0	0	0	0.0161	0.0116	0.0149	0.0189	0.0015	0.0013	0	0.0065	0.0027	0.002	0.0039	0.0045	0	0	0	0	0.003	0.0051	0.0029	0.0042	0.0025
71	0.0029	0.0013	0.002	0.0069	0.0013	0.0113	0.01	0.0007	0	0	0	0.0021	0.0033	0.0031	0	0.0044	0.006	0.0017	0.0019	0.0058	0.0015	0.0023	0.008	0.009	0	0.0003	0	0.0021	0.0121	0.0082	0.023	0.0138	0.0011	0.0015	0	0.0067	0.0036	0.0029	0.0062	0.0063	0	0	0	0	0.0044	0.0066	0.0045	0.0058	0.0025
75	0.0049	0.0064	0.0029	0.0087	0.0064	0.0143	0.0111	0.0018	0	0.0003	0	0.004	0.0029	0.0034	0.0003	0.0049	0.0073	0.0026	0.003	0.0068	0.0025	0.0033	0.0087	0.0096	0	0.0013	0.0009	0.0033	0.0127	0.009	0.0097	0.0143	0.0024	0.0027	0	0.0081	0.0043	0.0035	0.0068	0.0069	0	0	0	0.0006	0.0054	0.0082	0.0049	0.0065	0.0033
79	0.0058	0.0026	0.0045	0.0099	0.0026	0.0159	0.0117	0.0027	0.0002	0.0008	0	0.004	0.0052	0.0052	0.0024	0.0075	0.0081	0.0041	0.004	0.0078	0.0038	0.0046	0.0099	0.0107	0	0.0025	0.0018	0.0049	0.0137	0.0103	0.0104	0.0153	0.0034	0.0037	0.001	0.0095	0.0051	0.005	0.0075	0.0086	0	0.0007	0	0.0019	0.0066	0.0098	0.0062	0.0074	0.0102
83	0.008	0.0047	0.0065	0.0118	0.0047	0.0174	0.013	0.004	0.0027	0.0035	0.0026	0.0068	0.0057	0.0059	0.0035	0.0068	0.0099	0.0054	0.0053	0.0097	0.0051	0.0055	0.0117	0.0119	0	0.0039	0.0033	0.0065	0.0154	0.0115	0.012	0.0166	0.0046	0.0052	0.0017	0.0114	0.0071	0.0065	0.0094	0.0099	0	0.0023	0	0.0027	0.009	0.0113	0.0085	0.0097	0.0059
87	0.0098	0.0061	0.0072	0.0128	0.0061	0.0184	0.0149	0.006	0.0064	0.0054	0.0064	0.0091	0.0071	0.0086	0.0051	0.0088	0.0125	0.0068	0.0068	0.0108	0.0063	0.0074	0.0133	0.0135	0.0013	0.0055	0.0052	0.0084	0.0166	0.0124	0.0193	0.0179	0.0077	0.0069	0.0032	0.0133	0.0073	0.0067	0.0101	0.0112	0.0015	0.0039	0.0007	0.0049	0.01	0.0135	0.0106	0.0109	0.0066
91	0.012	0.0078	0.0089	0.0155	0.0078	0.0184	0.0159	0.0071	0.0049	0.0054	0.0037	0.0079	0.0088	0.0092	0.0054	0.0092	0.0118	0.0078	0.0078	0.0116	0.0087	0.0084	0.0145	0.0163	0.0027	0.0072	0.0065	0.0097	0.018	0.0136	0.0155	0.0201	0.0082	0.0083	0.0048	0.0145	0.0091	0.0084	0.0118	0.0129	0.0019	0.0046	0.0013	0.0056	0.0114	0.0149	0.0122	0.0125	0.0083
95	0.0145	0.0117	0.0115	0.0172	0.0117	0.0221	0.019	0.0095	0.0106	0.01	0.0092	0.0147	0.0113	0.0118	0.0087	0.0126	0.0145	0.01	0.0105	0.0143	0.0104	0.0103	0.0176	0.0173	0.0057	0.0095	0.0092	0.0124	0.0203	0.016	0.0253	0.0223	0.0116	0.011	0.0078	0.0176	0.011	0.0101	0.0145	0.0147	0.0046	0.0073	0.0039	0.0082	0.0142	0.017	0.0139	0.015	0.01
99	0.0151	0.0102	0.0112	0.0181	0.0102	0.0217	0.0256	0.0105	0.0106	0.0099	0.0091	0.0124	0.012	0.0124	0.008	0.0133	0.0142	0.0107	0.0107	0.0145	0.0108	0.0114	0.0179	0.018	0.0057	0.0099	0.0093	0.0129	0.0208	0.0167	0.018	0.022	0.0124	0.0118	0.0083	0.018	0.0118	0.0105	0.016	0.0159	0.0044	0.0074	0.0035	0.0082	0.0145	0.018	0.0145	0.0173	0.0106
103	0.0199	0.0133	0.0152	0.022	0.0133	0.0239	0.022	0.0123	0.0141	0.0132	0.0123	0.0172	0.0151	0.0152	0.0109	0.0144	0.011	0.0125	0.009	0.0137	0.0179	0.0175	0.0233	0.0293	0.0094	0.0134	0.0122	0.0163	0.0235	0.0188	0.0212	0.0259	0.0158	0.0144	0.0108	0.0216	0.0148	0.0126	0.0186	0.0178	0.0071	0.0108	0.0063	0.0114	0.0179	0.0215	0.0181	0.0185	0.0135
107	0.0246	0.0176	0.0201	0.0264	0.0176	0.0271	0.0238	0.015	0.0176	0.0176	0.0151	0.0186	0.0179	0.019	0.0139	0.018	0.0198	0.0169	0.0159	0.0199	0.018	0.017	0.0244	0.0259	0.0131	0.0163	0.0152	0.0201	0.0279	0.0229	0.0241	0.0286	0.0202	0.0184	0.0152	0.026	0.0176	0.0162	0.0213	0.0218	0.0112	0.0142	0.0103	0.0155	0.0214	0.0243	0.0204	0.0228	0.0158
111	0.0273	0.0232	0.0206	0.028	0.0232	0.0293	0.0275	0.0178	0.0195	0.0192	0.0172	0.0218	0.0183	0.0208	0.0153	0.0188	0.0205	0.0186	0.0199	0.0215	0.0196	0.0197	0.0267	0.0289	0.0145	0.0183	0.0172	0.0225	0.0294	0.0268	0.0275	0.0319	0.023	0.0211	0.0158	0.0298	0.0204	0.018	0.0252	0.0237	0.0134	0.0159	0.0112	0.0166	0.024	0.0273	0.0236	0.0253	0.0184
115	0.0315	0.0252	0.0282	0.0323	0.0252	0.0327	0.0317	0.022	0.0238	0.0243	0.0209	0.0251	0.0229	0.0253	0.0171	0.0213	0.0323	0.0259	0.0275	0.0318	0.0247	0.0229	0.0305	0.0284	0.0192	0.0228	0.0227	0.0273	0.034	0.0276	0.0304	0.0341	0.0266	0.0244	0.0187	0.033	0.024	0.0211	0.0276	0.0275	0.0174	0.0202	0.0148	0.0213	0.0275	0.0282	0.0282	0.0287	0.023
119	0.0376	0.0259	0.03	0.0398	0.0259	0.0377	0.0383	0.0252	0.0287	0.0279	0.0253	0.0307	0.0266	0.0286	0.0242	0.0278	0.0287	0.0281	0.0278	0.0323	0.0283	0.0302	0.0358	0.037	0.0236	0.0277	0.0277	0.0316	0.0386	0.0312	0.0409	0.0381	0.0323	0.0296	0.0248	0.0378	0.0281	0.024	0.0325	0.032	0.0212	0.0244	0.0177	0.0265	0.0324	0.0334	0.032	0.0333	0.0265
123	0.0438	0.0328	0.0361	0.0436	0.0328	0.0394	0.0384	0.0312	0.0359	0.0346	0.0337	0.0375	0.0353	0.0339	0.0249	0.0304	0.0345	0.0342	0.0398	0.037	0.034	0.0374	0.0402	0.0426	0.0301	0.0332	0.032	0.0373	0.0441	0.0372	0.04	0.0419	0.0382	0.0362	0.0302	0.044	0.0373	0.0298	0.0359	0.0384	0.0257	0.0279	0.0231	0.0292	0.0379	0.04	0.0373	0.0404	0.0318
127	0.0464	0.0376	0.0405	0.0471	0.0376	0.0463	0.045	0.037	0.0397	0.0384	0.0351	0.0427	0.0359	0.0392	0.0276	0.0339	0.0427	0.0359	0.0333	0.0364	0.0378	0.036	0.0444	0.0498	0.0345	0.0374	0.0363	0.0418	0.049	0.0393	0.043	0.0484	0.0432	0.0395	0.0354	0.0493	0.0392	0.0341	0.0415	0.0407	0.0308	0.0339	0.0276	0.0356	0.0412	0.0453	0.0404	0.0458	0.036
131	0.0546	0.0445	0.0471	0.0545	0.0445	0.0524	0.0487	0.0435	0.0414	0.0434	0.037	0.0448	0.044	0.0443	0.0311	0.0383	0.0537	0.0492	0.0458	0.0509	0.0446	0.0401	0.0494	0.0502	0.0436	0.0443	0.0437	0.049	0.0539	0.0448	0.0534	0.0583	0.0495	0.0481	0.0397	0.0556	0.0464	0.0431	0.0467	0.0468	0.0395	0.0401	0.0347	0.0406	0.0486	0.0463	0.0473	0.05	0.0446
135	0.065	0.0501	0.0537	0.0652	0.0501	0.0546	0.0587	0.0495	0.0467	0.0507	0.0463	0.0544	0.0478	0.0519	0.0366	0.0456	0.0629	0.0548	0.0534	0.0556	0.0589	0.0477	0.0563	0.06	0.0496	0.052	0.0516	0.0583	0.0653	0.0536	0.0564	0.0633	0.0574	0.0546	0.0482	0.0662	0.0513	0.0411	0.0517	0.0574	0.0458	0.0484	0.0413	0.0518	0.0542	0.0508	0.054	0.0549	0.0469
139	0.0713	0.0631	0.063	0.0702	0.0631	0.0634	0.0677	0.0576	0.0588	0.0646	0.058	0.0576	0.052	0.0608	0.041	0.0501	0.0662	0.0661	0.0584	0.0662	0.0594	0.0546	0.0677	0.0705	0.0616	0.0611	0.0607	0.0691	0.0714	0.0641	0.0654	0.072	0.0666	0.0648	0.0535	0.0727	0.0655	0.0578	0.0587	0.0631	0.0588	0.059	0.0511	0.0621	0.0647	0.0634	0.0616	0.0622	0.0572
143	0.0826	0.0709	0.0728	0.0827	0.0709	0.066	0.0727	0.0672	0.0667	0.0669	0.0669	0.0643	0.0696	0.0716	0.0464	0.0608	0.0661	0.0696	0.0624	0.0676	0.0765	0.0666	0.0758	0.0784	0.0702	0.0702	0.0695	0.0814	0.0792	0.0669	0.0725	0.0785	0.0798	0.0688	0.0651	0.0853	0.0712	0.0587	0.0686	0.0702	0.0639	0.0669	0.0609	0.0733	0.0725	0.0729	0.0698	0.0709	0.0648
147	0.0972	0.0827	0.0867	0.0925	0.0827	0.0823	0.1007	0.0768	0.085	0.0883	0.0797	0.0809	0.0757	0.0783	0.0548	0.0726	0.0866	0.0847	0.084	0.0871	0.09	0.0781	0.088	0.0916	0.089	0.0855	0.0836	0.0995	0.093	0.0797	0.0849	0.0891	0.094	0.0844	0.0755	0.1049	0.0849	0.072	0.0821	0.0866	0.0801	0.0805	0.0761	0.0898	0.0869	0.0873	0.0863	0.0891	0.0811
151	0.108	0.0996	0.0973	0.1079	0.0996	0.094	0.1108	0.0844	0.1075	0.0957	0.0954	0.0974	0.0952	0.0906	0.0616	0.0833	0.1095	0.1005	0.0988	0.0953	0.1049	0.0906	0.1008	0.1063	0.1002	0.0958	0.1031	0.1119	0.1042	0.0894	0.0985	0.1092	0.1069	0.1013	0.0892	0.1167	0.0967	0.0923	0.1017	0.1064	0.0964	0.0943	0.0902	0.1061	0.103	0.1015	0.0951	0.1069	0.0948
155	0.1246	0.1057	0.1097	0.1189	0.1057	0.11	0.1151	0.0978	0.1054	0.1083	0.1028	0.1031	0.1018	0.1075	0.0667	0.0981	0.1097	0.1082	0.106	0.1078	0.1194	0.1015	0.1091	0.1137	0.1091	0.1081	0.1098	0.1162	0.1207	0.1012	0.1168	0.1248	0.121	0.1102	0.1009	0.1292	0.1081	0.0939	0.1074	0.1122	0.1032	0.1085	0.0948	0.1114	0.113	0.1076	0.1107	0.1155	0.1006
159	0.1367	0.1234	0.1241	0.1323	0.1234	0.1253	0.1317	0.1163	0.1212	0.1182	0.1201	0.1288	0.1258	0.1145	0.0769	0.1161	0.1223	0.1235	0.1206	0.1145	0.1331	0.1209	0.1323	0.1328	0.126	0.124	0.1227	0.1332	0.1352	0.1181	0.1311	0.1407	0.1363	0.1265	0.1198	0.1409	0.1224	0.1093	0.1208	0.1265	0.119	0.1203	0.1121	0.1274	0.1276	0.1208	0.1467	0.1272	0.1177
163	0.1506	0.1391	0.1462	0.1507	0.1391	0.1455	0.1514	0.1356	0.1342	0.132	0.1304	0.1353	0.1458	0.1341	0.0913	0.1355	0.1452	0.1376	0.1351	0.1372	0.1507	0.1314	0.1465	0.1511	0.1415	0.1385	0.1424	0.1562	0.1494	0.1293	0.1421	0.151	0.1539	0.1463	0.1372	0.1598	0.1409	0.1308	0.1412	0.1467	0.1386	0.136	0.1282	0.1416	0.1506	0.1361	0.1415	0.1479	0.1313
167	0.1693	0.1576	0.1606	0.1748	0.1576	0.1638	0.172	0.154	0.1561	0.1516	0.1519	0.1569	0.1606	0.1455	0.109	0.1533	0.1594	0.1544	0.1529	0.1488	0.1661	0.1652	0.1639	0.1669	0.163	0.157	0.1569	0.173	0.1699	0.1501	0.1671	0.1701	0.1787	0.1646	0.1532	0.1828	0.1572	0.1487	0.1641	0.1685	0.1562	0.1538	0.1469	0.1631	0.1692	0.1594	0.1781	0.1682	0.1438
171	0.1858	0.1727	0.1761	0.1911	0.1727	0.1838	0.1879	0.1718	0.172	0.163	0.1704	0.1698	0.1788	0.1606	0.1257	0.1706	0.1807	0.1688	0.1762	0.1662	0.1871	0.1696	0.1856	0.1863	0.1804	0.1705	0.1727	0.1874	0.1856	0.1655	0.1829	0.1889	0.1945	0.1812	0.1653	0.1975	0.1774	0.1647	0.1828	0.1869	0.1742	0.1732	0.1659	0.1811	0.1828	0.1779	0.1824	0.1854	0.1764
175	0.2039	0.1908	0.1904	0.2085	0.1908	0.2044	0.2054	0.1893	0.1889	0.1837	0.1857	0.1825	0.2034	0.1796	0.1511	0.1948	0.1928	0.1864	0.1931	0.1802	0.2051	0.1818	0.2077	0.2093	0.1984	0.1944	0.1892	0.207	0.2061	0.1788	0.2015	0.2088	0.2098	0.1999	0.1833	0.2216	0.1961	0.1795	0.2082	0.2089	0.1946	0.1901	0.1866	0.1999	0.2058	0.1953	0.2045	0.2096	0.2014
179	0.2161	0.2093	0.2054	0.2276	0.2093	0.2248	0.2222	0.2108	0.2058	0.1971	0.2056	0.2055	0.2223	0.204	0.1704	0.2135	0.2102	0.2014	0.2089	0.1957	0.2245	0.2022	0.2223	0.2229	0.2226	0.212	0.209	0.2293	0.2285	0.2061	0.2282	0.2316	0.2354	0.2187	0.2136	0.2451	0.213	0.2076	0.2309	0.2327	0.2128	0.2093	0.2048	0.2183	0.2201	0.212	0.2233	0.2285	0.2217
183	0.2355	0.2286	0.2234	0.2431	0.2286	0.2319	0.2401	0.2281	0.2238	0.2132	0.2248	0.2288	0.2387	0.222	0.1858	0.2319	0.2373	0.223	0.2331	0.2153	0.242	0.2184	0.2447	0.2394	0.2366	0.2248	0.2284	0.2434	0.2387	0.2179	0.2468	0.2459	0.2505	0.2347	0.2278	0.2584	0.2411	0.223	0.2467	0.2474	0.2317	0.2264	0.2213	0.2378	0.2408	0.2329	0.2407	0.2467	0.2436
187	0.2456	0.2407	0.237	0.2586	0.2407	0.241	0.2529	0.2382	0.2348	0.2258	0.2398	0.2453	0.2562	0.2326	0.2002	0.241	0.2488	0.2334	0.2464	0.2278	0.2549	0.2315	0.2582	0.2547	0.2503	0.2426	0.2402	0.2553	0.2581	0.2295	0.2617	0.2621	0.2671	0.2534	0.2432	0.2735	0.2485	0.2384	0.2651	0.2638	0.2465	0.2413	0.2369	0.2523	0.2533	0.2457	0.2605	0.2633	0.258
191	0.2628	0.264	0.2533	0.2742	0.264	0.2593	0.2746	0.2566	0.2514	0.2413	0.2552	0.2624	0.269	0.2481	0.2205	0.2593	0.2662	0.2595	0.264	0.245	0.2762	0.253	0.2782	0.2751	0.2692	0.2574	0.2577	0.2744	0.2744	0.2446	0.285	0.2801	0.2836	0.2667	0.2621	0.2921	0.2649	0.2522	0.2824	0.2828	0.2673	0.2593	0.2569	0.2688	0.2747	0.2614	0.2811	0.2788	0.2736
195	0.285	0.2807	0.2763	0.2963	0.2807	0.2705	0.2902	0.2728	0.2751	0.2604	0.2748	0.2812	0.2919	0.2629	0.2327	0.2705	0.2884	0.28	0.2822	0.2614	0.2957	0.2671	0.2968	0.2919	0.2866	0.2751	0.2767	0.2932	0.2906	0.2619	0.3016	0.2995	0.3017	0.2876	0.2831	0.3091	0.2801	0.2705	0.2994	0.2962	0.2836	0.2756	0.2734	0.2879	0.2933	0.2781	0.2984	0.2986	0.2919
199	0.3029	0.3014	0.2909	0.3121	0.3014	0.2902	0.307	0.292	0.2873	0.2726	0.2921	0.2962	0.307	0.2804	0.2541	0.2902	0.3055	0.2976	0.2985	0.2795	0.3147	0.286	0.3142	0.3113	0.3069	0.2937	0.296	0.3111	0.3124	0.2777	0.3213	0.321	0.3215	0.3035	0.2966	0.3307	0.2981	0.2848	0.3195	0.3149	0.3008	0.2953	0.2911	0.3068	0.312	0.2956	0.3137	0.3156	0.3068
203	0.3233	0.3189	0.3115	0.3319	0.3189	0.3232	0.3294	0.3126	0.3054	0.3023	0.3119	0.3166	0.3302	0.3047	0.2757	0.317	0.3232	0.3176	0.3207	0.3069	0.3357	0.3095	0.3369	0.3322	0.3275	0.3152	0.319	0.3371	0.333	0.3016	0.3449	0.3441	0.3394	0.3262	0.3173	0.3528	0.3182	0.3096	0.3382	0.3361	0.3229	0.3149	0.3108	0.3301	0.3306	0.3181	0.3449	0.3356	0.3236
207	0.3543	0.3448	0.3343	0.3528	0.3448	0.3504	0.3523	0.3291	0.3337	0.3311	0.3373	0.3416	0.3508	0.3319	0.2916	0.3361	0.3504	0.3428	0.3422	0.3416	0.3609	0.3348	0.359	0.3591	0.3469	0.3384	0.3408	0.3566	0.3585	0.3239	0.3714	0.368	0.3661	0.3491	0.3416	0.3776	0.3413	0.3473	0.3711	0.3623	0.3412	0.3366	0.331	0.3526	0.3603	0.3574	0.367	0.3654	0.3359
211	0.3671	0.3653	0.3489	0.3719	0.3653	0.3746	0.3732	0.3538	0.359	0.3535	0.3517	0.3672	0.3669	0.3431	0.307	0.352	0.3746	0.3653	0.3703	0.3714	0.3892	0.3596	0.3819	0.3789	0.3718	0.3581	0.3627	0.3778	0.3797	0.3413	0.4052	0.3842	0.3795	0.3693	0.3617	0.4008	0.3621	0.3682	0.3886	0.3814	0.3733	0.3651	0.3588	0.3785	0.3895	0.3816	0.3956	0.3848	0.3653
215	0.3859	0.3783	0.3626	0.3871	0.3783	0.389	0.3905	0.3698	0.3765	0.3693	0.3724	0.3858	0.3875	0.3625	0.3314	0.3693	0.389	0.3865	0.3849	0.3871	0.4065	0.3791	0.4041	0.3992	0.3928	0.3825	0.3849	0.3987	0.3996	0.3667	0.4184	0.4029	0.3958	0.3878	0.3821	0.4128	0.3836	0.3828	0.4119	0.4001	0.3818	0.3811	0.3745	0.393	0.4051	0.3984	0.412	0.4069	0.3759
219	0.396	0.3898	0.3739	0.3981	0.3898	0.4023	0.4003	0.3775	0.3887	0.3839	0.3785	0.3946	0.3975	0.3739	0.3554	0.3798	0.4023	0.394	0.3915	0.3993	0.4136	0.3851	0.4111	0.411	0.406	0.3908	0.3919	0.4093	0.4081	0.3766	0.4241	0.4163	0.4067	0.3948	0.3881	0.4187	0.3929	0.3864	0.4159	0.4092	0.3961	0.3941	0.3841	0.4052	0.4122	0.4047	0.4195	0.4187	0.3952
223	0.4061	0.3998	0.3848	0.4097	0.3998	0.4127	0.416	0.393	0.4017	0.3948	0.3901	0.4055	0.4083	0.3864	0.3777	0.3919	0.4127	0.4054	0.4019	0.4161	0.4236	0.3964	0.4221	0.4244	0.4171	0.4004	0.4027	0.4199	0.4179	0.3917	0.4338	0.4275	0.417	0.4041	0.3998	0.4291	0.4052	0.3986	0.4294	0.4207	0.4079	0.4039	0.3948	0.4157	0.4223	0.4117	0.4312	0.4267	0.4135
227	0.4146	0.4077	0.3956	0.4167	0.4077	0.4137	0.4246	0.4038	0.413	0.4052	0.4007	0.4137	0.4171	0.3963	0.3964	0.3992	0.4137	0.4069	0.4033	0.4185	0.4261	0.4017	0.4282	0.4324	0.4163	0.4024	0.4022	0.4214	0.4195	0.395	0.4336	0.4297	0.4276	0.4157	0.4067	0.4404	0.4236	0.4033	0.4416	0.432	0.417	0.415	0.4025	0.426	0.4342	0.4214	0.4456	0.4404	0.4238
231	0.4209	0.4181	0.4041	0.4263	0.4181	0.4273	0.4343	0.414	0.4188	0.4124	0.4051	0.4198	0.4267	0.408	0.412	0.4165	0.4273	0.4205	0.4149	0.432	0.4377	0.4154	0.4415	0.4459	0.4275	0.4132	0.4146	0.4326	0.4322	0.4076	0.4462	0.4408	0.4385	0.4244	0.4194	0.4503	0.4343	0.4176	0.4524	0.4448	0.43	0.4254	0.4152	0.4382	0.4446	0.4321	0.4563	0.4542	0.4337
235	0.427	0.4254	0.4106	0.434	0.4254	0.4345	0.4443	0.4248	0.4277	0.4207	0.4133	0.4292	0.4347	0.4154	0.4221	0.4239	0.4345	0.4285	0.423	0.4401	0.4475	0.4226	0.4496	0.4563	0.4349	0.4216	0.4217	0.4416	0.4419	0.415	0.455	0.4506	0.4469	0.433	0.4274	0.4589	0.4437	0.4224	0.4611	0.4539	0.4389	0.4343	0.423	0.4464	0.4538	0.4381	0.4643	0.4608	0.4434
239	0.4339	0.4332	0.4192	0.4412	0.4332	0.4418	0.4535	0.4323	0.4393	0.4323	0.4238	0.4403	0.4401	0.4179	0.4308	0.4282	0.4418	0.4342	0.4285	0.4447	0.4525	0.4282	0.4557	0.4614	0.4359	0.4249	0.4225	0.4436	0.443	0.417	0.4589	0.4548	0.4519	0.44	0.4311	0.4666	0.4501	0.428	0.4669	0.4596	0.4521	0.4455	0.4349	0.4606	0.4606	0.4428	0.4728	0.4629	0.4466
243	0.4409	0.4397	0.4275	0.4486	0.4397	0.4507	0.4604	0.4395	0.4435	0.4354	0.4273	0.4442	0.4499	0.4285	0.4421	0.4427	0.4507	0.4431	0.4377	0.455	0.4607	0.4348	0.4645	0.4704	0.4486	0.4357	0.4351	0.455	0.4545	0.4268	0.4703	0.4651	0.462	0.448	0.4416	0.4752	0.4579	0.4367	0.4764	0.4703	0.4562	0.4509	0.4392	0.4646	0.4695	0.4539	0.4821	0.4776	0.4545
247	0.4482	0.4476	0.431	0.4542	0.4476	0.455	0.4663	0.4463	0.4553	0.4451	0.4387	0.4554	0.4564	0.4308	0.4503	0.4431	0.455	0.4479	0.4428	0.4593	0.4663	0.4414	0.4706	0.476	0.4532	0.4398	0.4384	0.4593	0.4594	0.4296	0.476	0.4723	0.4682	0.4547	0.4464	0.4814	0.4638	0.4414	0.4825	0.4757	0.464	0.4589	0.4462	0.474	0.4761	0.4578	0.4992	0.4839	0.4623
251	0.4517	0.4536	0.4365	0.4588	0.4536	0.461	0.4717	0.453	0.4645	0.4528	0.4471	0.4635	0.46	0.4357	0.4543	0.4481	0.461	0.4548	0.4478	0.4677	0.4727	0.4468	0.4787	0.4828	0.4612	0.447	0.4468	0.4675	0.4667	0.437	0.4848	0.4794	0.4735	0.4596	0.4525	0.4863	0.4677	0.4459	0.4887	0.482	0.4676	0.4639	0.4507	0.4776	0.4827	0.4624	0.4948	0.4899	0.4658
255	0.4603	0.4616	0.4459	0.4698	0.4616	0.4699	0.4792	0.4594	0.4737	0.4598	0.4564	0.4706	0.4695	0.4449	0.4662	0.4574	0.4699	0.462	0.4566	0.476	0.4834	0.454	0.4851	0.491	0.4697	0.4561	0.4554	0.4767	0.4755	0.4454	0.4971	0.4897	0.4826	0.4676	0.4612	0.4941	0.4778	0.4551	0.4974	0.4903	0.4763	0.4719	0.4595	0.4869	0.4902	0.4716	0.5034	0.498	0.4755
259	0.4654	0.4664	0.4503	0.4753	0.4664	0.4766	0.4897	0.4672	0.4753	0.4638	0.4588	0.4759	0.4768	0.4528	0.473	0.4642	0.4766	0.4684	0.4614	0.4817	0.4876	0.4623	0.4923	0.4977	0.473	0.4609	0.4609	0.4819	0.4813	0.4519	0.5001	0.4936	0.4852	0.4723	0.4663	0.5	0.4826	0.4617	0.5026	0.4966	0.4811	0.477	0.4656	0.4906	0.4964	0.4774	0.5092	0.5035	0.4832
263	0.4717	0.475	0.4553	0.4807	0.475	0.4813	0.4934	0.4725	0.4817	0.4709	0.4634	0.482	0.4816	0.4573	0.4789	0.4737	0.4813	0.4746	0.4667	0.4884	0.4942	0.4659	0.4991	0.5042	0.4803	0.4661	0.4647	0.4882	0.4863	0.4546	0.5049	0.5001	0.4924	0.4794	0.4712	0.5061	0.4889	0.4648	0.5098	0.5026	0.4874	0.4849	0.4714	0.499	0.5042	0.4819	0.5174	0.511	0.4892
267	0.4806	0.4839	0.4638	0.4901	0.4839	0.4905	0.5031	0.4791	0.4895	0.4787	0.4727	0.4893	0.4899	0.4656	0.4882	0.483	0.4905	0.4815	0.4773	0.4955	0.5005	0.4729	0.5051	0.5115	0.4853	0.4727	0.472	0.4948	0.4935	0.4606	0.5123	0.5067	0.5	0.4872	0.4794	0.5144	0.4971	0.4726	0.5177	0.5099	0.4973	0.4936	0.4805	0.5084	0.5129	0.491	0.5261	0.5192	0.4996
271	0.4866	0.4906	0.4727	0.4982	0.4906	0.4933	0.5135	0.49	0.4948	0.4844	0.4776	0.4963	0.5	0.4735	0.4954	0.4889	0.4933	0.4882	0.4806	0.4998	0.512	0.4834	0.5151	0.5242	0.4949	0.4836	0.4815	0.5058	0.503	0.4734	0.5231	0.5183	0.5062	0.4919	0.4869	0.5203	0.5024	0.4796	0.5239	0.5167	0.5007	0.4975	0.4847	0.5132	0.5171	0.4993	0.5298	0.5239	0.5058
275	0.4942	0.4972	0.4789	0.5049	0.4972	0.5019	0.5167	0.494	0.5036	0.4935	0.4883	0.5046	0.506	0.4779	0.5038	0.4901	0.5019	0.4959	0.4884	0.5089	0.5176	0.4906	0.5208	0.5285	0.5093	0.4924	0.4924	0.5139	0.5122	0.4798	0.535	0.5259	0.5094	0.4959	0.4903	0.5225	0.5045	0.4789	0.5261	0.5182	0.5046	0.5019	0.4884	0.5177	0.5209	0.499	0.5346	0.5272	0.5118
279	0.5017	0.5013	0.4841	0.5099	0.5013	0.5104	0.5274	0.5005	0.5102	0.4984	0.4926	0.5113	0.5125	0.4834	0.5093	0.4992	0.5104	0.5016	0.4942	0.5157	0.5214	0.493	0.5281	0.5325	0.5034	0.4924	0.4921	0.5142	0.5175	0.4888	0.5381	0.5345	0.5163	0.5017	0.4969	0.5294	0.5125	0.4886	0.5341	0.5268	0.5102	0.5071	0.4957	0.5234	0.5267	0.5069	0.5404	0.5345	0.5182
283	0.5061	0.5073	0.4872	0.513	0.5073	0.5166	0.5307	0.5067	0.5179	0.5047	0.4987	0.5164	0.515	0.4878	0.5151	0.5054	0.5166	0.5069	0.5003	0.5219	0.5287	0.498	0.5319	0.5397	0.5113	0.4992	0.4986	0.521	0.5242	0.4942	0.5446	0.5416	0.5293	0.5134	0.5105	0.5399	0.5238	0.4997	0.5451	0.5376	0.5094	0.5055	0.4982	0.5209	0.5255	0.5046	0.5393	0.5323	0.5208
287	0.5115	0.5146	0.4933	0.5197	0.5146	0.5227	0.5355	0.5144	0.527	0.5144	0.5083	0.5257	0.5265	0.496	0.5232	0.5083	0.5227	0.5129	0.5055	0.5274	0.5332	0.5032	0.5385	0.5443	0.5199	0.5067	0.5057	0.5279	0.5288	0.4943	0.5558	0.5425	0.5318	0.5191	0.5124	0.5459	0.5294	0.5046	0.5509	0.5442	0.529	0.5234	0.5122	0.5384	0.5444	0.5202	0.5573	0.5514	0.53
291	0.5176	0.5203	0.5009	0.5272	0.5203	0.5306	0.5446	0.5213	0.5268	0.5153	0.5067	0.5271	0.5301	0.5013	0.5285	0.5185	0.5306	0.5199	0.514	0.5385	0.535	0.5085	0.5405	0.5448	0.536	0.5211	0.5199	0.544	0.5469	0.5167	0.5661	0.5621	0.5347	0.5199	0.5174	0.5471	0.5342	0.5095	0.5548	0.5504	0.531	0.5273	0.5158	0.5431	0.5476	0.525	0.561	0.5561	0.5338
295	0.5238	0.5252	0.5048	0.5305	0.5252	0.5333	0.5494	0.5237	0.5314	0.5204	0.5155	0.5327	0.5333	0.5039	0.5354	0.5223	0.5333	0.5241	0.5163	0.5387	0.5428	0.5149	0.5479	0.5572	0.5282	0.5144	0.5129	0.5365	0.5388	0.5081	0.5609	0.558	0.5456	0.5301	0.5261	0.5562	0.541	0.5159	0.5622	0.5553	0.5297	0.5238	0.5171	0.538	0.5433	0.5221	0.5583	0.5522	0.5395
299	0.5292	0.5313	0.5097	0.5353	0.5313	0.5382	0.5543	0.5309	0.5421	0.525	0.5212	0.5382	0.5386	0.5096	0.5439	0.5258	0.5382	0.5271	0.5202	0.5436	0.5471	0.5191	0.5531	0.561	0.5332	0.5208	0.5195	0.5426	0.5458	0.5117	0.5677	0.5641	0.5497	0.5361	0.5315	0.5613	0.546	0.52	0.567	0.5609	0.5335	0.5287	0.5206	0.5452	0.5497	0.5257	0.5643	0.557	0.544
303	0.5309	0.5356	0.517	0.5409	0.5356	0.5403	0.5595	0.5338	0.5402	0.5288	0.52	0.5402	0.5412	0.5132	0.5419	0.5294	0.5403	0.5326	0.5241	0.5453	0.5535	0.5281	0.559	0.5669	0.541	0.5254	0.5239	0.5476	0.5466	0.5143	0.5787	0.5616	0.5453	0.531	0.5256	0.5588	0.5424	0.517	0.564	0.5582	0.5436	0.5391	0.5262	0.5553	0.5581	0.5372	0.5728	0.5659	0.5511
307	0.5362	0.5403	0.5181	0.5466	0.5403	0.5491	0.563	0.5409	0.549	0.5362	0.5289	0.5474	0.5489	0.5189	0.5517	0.536	0.5491	0.537	0.5292	0.5534	0.5578	0.5295	0.5622	0.5706	0.5426	0.5286	0.528	0.551	0.5541	0.5236	0.587	0.5716	0.5606	0.5444	0.5405	0.5714	0.556	0.5299	0.5764	0.57	0.5448	0.5381	0.5306	0.5535	0.5576	0.5372	0.5723	0.5658	0.5546
311	0.5402	0.5445	0.5243	0.5507	0.5445	0.5481	0.5664	0.5419	0.5481	0.5355	0.5281	0.5494	0.5509	0.5208	0.5533	0.5383	0.5481	0.539	0.5309	0.5527	0.561	0.5324	0.5673	0.5759	0.547	0.5338	0.5314	0.5562	0.558	0.5264	0.5804	0.5759	0.5621	0.5459	0.5423	0.573	0.5559	0.5305	0.5788	0.5719	0.5491	0.5418	0.5332	0.5585	0.5622	0.5397	0.577	0.57	0.5599
315	0.5477	0.5522	0.5326	0.5597	0.5522	0.5555	0.5777	0.5495	0.5566	0.5435	0.5358	0.5574	0.5619	0.5297	0.5618	0.545	0.5555	0.5482	0.5374	0.5625	0.5673	0.5372	0.5736	0.5784	0.5615	0.5476	0.5453	0.5704	0.5758	0.5438	0.5943	0.5923	0.5747	0.5577	0.5547	0.5863	0.5728	0.5478	0.5927	0.5866	0.5587	0.5522	0.5444	0.5681	0.5743	0.551	0.5889	0.5823	0.5656
319	0.5548	0.5583	0.5371	0.5646	0.5583	0.5622	0.5774	0.5555	0.562	0.5482	0.5446	0.5638	0.566	0.5363	0.5676	0.5491	0.5622	0.553	0.5448	0.5672	0.574	0.5424	0.5801	0.5852	0.5689	0.5547	0.5515	0.5786	0.5817	0.546	0.607	0.5964	0.5802	0.564	0.561	0.5907	0.5762	0.5491	0.5978	0.5901	0.5595	0.5542	0.5455	0.5707	0.5753	0.5492	0.5933	0.5824	0.5661
323	0.5568	0.5642	0.5425	0.5712	0.5642	0.5746	0.5849	0.5595	0.5726	0.5571	0.5511	0.5721	0.5753	0.54	0.5728	0.5575	0.5746	0.5604	0.5519	0.5757	0.5774	0.5462	0.5811	0.5822	0.567	0.5547	0.552	0.5742	0.5812	0.5456	0.6014	0.5996	0.5703	0.5592	0.5514	0.5867	0.5688	0.5407	0.5934	0.5825	0.5786	0.572	0.5588	0.5892	0.5892	0.5619	0.6025	0.5887	0.5822
327	0.5584	0.5679	0.5437	0.5709	0.5679	0.5729	0.5885	0.5671	0.5715	0.5609	0.5533	0.573	0.5798	0.5424	0.5743	0.5588	0.5729	0.5648	0.5575	0.5785	0.5839	0.5542	0.587	0.5945	0.57	0.5579	0.5559	0.5788	0.5862	0.553	0.6066	0.6054	0.5785	0.5638	0.5577	0.591	0.5739	0.5485	0.5989	0.59	0.5799	0.5743	0.5608	0.5908	0.5915	0.5639	0.6057	0.5933	0.5859
331	0.5697	0.5736	0.5483	0.5777	0.5736	0.5797	0.5932	0.5679	0.581	0.5655	0.5627	0.5811	0.5872	0.5487	0.5811	0.5647	0.5797	0.5707	0.5629	0.5853	0.5907	0.5595	0.5927	0.6021	0.5778	0.5643	0.5641	0.5837	0.5925	0.5591	0.6187	0.6123	0.5848	0.57	0.5644	0.5977	0.5802	0.5535	0.6041	0.595	0.5845	0.5789	0.5645	0.5926	0.598	0.5722	0.6148	0.6022	0.5877
335	0.5703	0.5718	0.5505	0.5841	0.5718	0.5879	0.5984	0.5759	0.5848	0.5699	0.5661	0.5841	0.5872	0.5534	0.5871	0.568	0.5879	0.5727	0.5662	0.5885	0.593	0.5592	0.5949	0.5981	0.5801	0.5665	0.5663	0.5869	0.5957	0.5602	0.6208	0.614	0.585	0.5732	0.5647	0.5998	0.5813	0.5547	0.6054	0.5969	0.5943	0.5867	0.5727	0.6012	0.6039	0.576	0.6178	0.6032	0.5989
339	0.5766	0.5804	0.5618	0.586	0.5804	0.5905	0.6036	0.5804	0.5883	0.5758	0.5706	0.5896	0.5961	0.5577	0.5937	0.5763	0.5905	0.5817	0.5751	0.5977	0.6042	0.5696	0.6094	0.6129	0.5877	0.5727	0.5738	0.5942	0.5994	0.5617	0.6243	0.6153	0.6051	0.589	0.5846	0.6144	0.5987	0.5718	0.6231	0.6126	0.5862	0.5812	0.5738	0.5954	0.6028	0.5777	0.6178	0.6089	0.5996
343	0.578	0.5858	0.5645	0.5873	0.5858	0.594	0.6068	0.5826	0.5895	0.5795	0.5713	0.5943	0.5977	0.5643	0.5981	0.5856	0.594	0.5821	0.5731	0.5993	0.6053	0.576	0.6135	0.6179	0.5991	0.5841	0.5825	0.6065	0.6116	0.5757	0.6369	0.6271	0.612	0.5956	0.5913	0.6224	0.6064	0.58	0.6282	0.619	0.5938	0.5869	0.5783	0.6011	0.607	0.5788	0.6272	0.6082	0.6042
347	0.5868	0.5939	0.5661	0.5963	0.5939	0.5988	0.6143	0.5836	0.5933	0.5825	0.5766	0.6004	0.6017	0.5657	0.5988	0.5865	0.5988	0.5897	0.5796	0.6033	0.6128	0.5814	0.617	0.6232	0.5963	0.5829	0.5821	0.6031	0.612	0.5752	0.6415	0.6305	0.6013	0.5888	0.5827	0.6171	0.6009	0.5711	0.6238	0.6144	0.608	0.5997	0.5889	0.6187	0.6196	0.5909	0.6339	0.6207	0.6144
351	0.5918	0.597	0.578	0.6029	0.597	0.6025	0.6215	0.5935	0.6036	0.5917	0.5826	0.6059	0.606	0.5728	0.6068	0.5895	0.6025	0.594	0.5844	0.6088	0.6162	0.5823	0.6203	0.6239	0.6095	0.5949	0.5922	0.6194	0.6252	0.5907	0.6542	0.6398	0.623	0.6049	0.6026	0.6337	0.6207	0.593	0.6417	0.6351	0.6055	0.5951	0.5923	0.613	0.6183	0.592	0.6323	0.6221	0.6143
355	0.6013	0.6012	0.5796	0.6081	0.6012	0.6076	0.6266	0.5953	0.6059	0.5943	0.5905	0.6097	0.6134	0.5769	0.6167	0.5957	0.6076	0.601	0.5885	0.6144	0.6236	0.5924	0.6298	0.6321	0.6078	0.5941	0.5937	0.6157	0.6237	0.5906	0.6554	0.6461	0.6118	0.5991	0.5929	0.6273	0.6126	0.5845	0.6345	0.6274	0.6211	0.6103	0.6002	0.6283	0.6314	0.6044	0.6452	0.6327	0.6281
359	0.6027	0.6062	0.5844	0.6096	0.6062	0.6128	0.6313	0.5994	0.6122	0.5999	0.5927	0.6145	0.616	0.5846	0.6191	0.6006	0.6128	0.6035	0.5925	0.6174	0.6267	0.592	0.6328	0.631	0.6093	0.5971	0.5956	0.6198	0.6274	0.5948	0.6502	0.6474	0.6178	0.6047	0.5987	0.6338	0.6184	0.5915	0.6413	0.633	0.6243	0.6136	0.6053	0.6327	0.637	0.6109	0.651	0.6379	0.6307
363	0.6076	0.6147	0.5916	0.6195	0.6147	0.6252	0.6326	0.6062	0.618	0.6061	0.6004	0.6207	0.6195	0.5882	0.6224	0.6021	0.6252	0.6112	0.6004	0.6249	0.6298	0.5961	0.637	0.632	0.6142	0.6006	0.601	0.6231	0.6299	0.5967	0.6607	0.6498	0.6175	0.6059	0.5979	0.6354	0.6184	0.591	0.6424	0.6343	0.6314	0.6212	0.61	0.6396	0.643	0.6167	0.6586	0.6418	0.6391
367	0.609	0.6154	0.5922	0.6208	0.6154	0.6258	0.6411	0.6097	0.6209	0.6127	0.6021	0.6246	0.6299	0.5943	0.6276	0.6105	0.6258	0.6147	0.6055	0.6317	0.637	0.6015	0.6399	0.6393	0.6197	0.6075	0.6055	0.627	0.637	0.6037	0.6725	0.6586	0.633	0.6176	0.6126	0.6481	0.6344	0.6084	0.6569	0.6495	0.639	0.6262	0.6196	0.6463	0.6513	0.6251	0.6665	0.6536	0.6402
371	0.6154	0.6213	0.6026	0.6259	0.6213	0.6321	0.6435	0.6175	0.6296	0.6136	0.6068	0.6305	0.632	0.5973	0.6342	0.6192	0.6321	0.6173	0.6103	0.636	0.6405	0.6032	0.6449	0.6439	0.6375	0.6236	0.6207	0.6469	0.6551	0.6188	0.6903	0.6726	0.6387	0.6243	0.6196	0.6521	0.6401	0.6126	0.6623	0.6562	0.6427	0.63	0.6257	0.6496	0.6556	0.6279	0.6701	0.6572	0.6484
375	0.6161	0.6259	0.6014	0.629	0.6259	0.6313	0.6454	0.6211	0.6282	0.6181	0.6048	0.632	0.6366	0.6028	0.6444	0.6269	0.6313	0.621	0.6145	0.6373	0.6466	0.6118	0.6524	0.6543	0.6198	0.6103	0.6071	0.6329	0.6402	0.609	0.6761	0.6643	0.6409	0.6281	0.62	0.6581	0.643	0.6173	0.6665	0.659	0.6502	0.6383	0.6292	0.6571	0.6623	0.6356	0.6778	0.665	0.6533
379	0.6235	0.6292	0.6085	0.6357	0.6292	0.6386	0.649	0.623	0.6389	0.6243	0.6221	0.6387	0.6458	0.6081	0.6538	0.6252	0.6386	0.6291	0.6201	0.6439	0.6539	0.6186	0.6572	0.6556	0.6347	0.6222	0.6218	0.6416	0.6508	0.6171	0.6768	0.6714	0.6499	0.6331	0.6302	0.6619	0.6516	0.6236	0.6737	0.6648	0.6545	0.6401	0.6348	0.6596	0.6665	0.6399	0.6858	0.6687	0.655
383	0.6246	0.6356	0.6109	0.6397	0.6356	0.6439	0.6575	0.6281	0.6451	0.6307	0.6233	0.6436	0.645	0.6115	0.6498	0.6316	0.6439	0.6329	0.6254	0.6473	0.6585	0.6235	0.6652	0.6638	0.6393	0.6258	0.6245	0.6479	0.6563	0.6246	0.6948	0.6788	0.6534	0.6385	0.6339	0.6694	0.6555	0.6288	0.6793	0.6709	0.6581	0.6457	0.64	0.6645	0.6711	0.6456	0.6882	0.6757	0.6614
387	0.6283	0.6388	0.6121	0.6406	0.6388	0.651	0.6549	0.6346	0.6478	0.636	0.6238	0.6457	0.6501	0.6151	0.6574	0.6346	0.651	0.6386	0.6309	0.6537	0.6669	0.6278	0.6713	0.6666	0.6429	0.6301	0.6295	0.6521	0.661	0.6292	0.6979	0.6852	0.6583	0.6429	0.6373	0.6742	0.6601	0.6328	0.6842	0.676	0.6635	0.6518	0.6446	0.6707	0.6777	0.6501	0.6929	0.6803	0.667
391	0.6381	0.6422	0.6251	0.6541	0.6422	0.6525	0.6678	0.6369	0.6522	0.6356	0.6379	0.6564	0.6559	0.6219	0.6693	0.639	0.6525	0.6493	0.6343	0.658	0.6694	0.6343	0.6753	0.6742	0.649	0.636	0.6372	0.6568	0.6675	0.6343	0.7005	0.6913	0.6639	0.6485	0.6459	0.6776	0.6653	0.6394	0.6897	0.6809	0.6698	0.657	0.6517	0.6744	0.6825	0.6562	0.7054	0.6846	0.6713
395	0.6395	0.6486	0.6199	0.6538	0.6486	0.6557	0.6656	0.6422	0.6614	0.6415	0.6339	0.6577	0.6617	0.6272	0.6635	0.6417	0.6557	0.6499	0.6381	0.6617	0.673	0.6408	0.6797	0.6766	0.6529	0.6405	0.6409	0.66	0.6722	0.6381	0.7014	0.6947	0.6682	0.653	0.6483	0.6819	0.6707	0.6428	0.6934	0.6843	0.6747	0.6603	0.6538	0.6797	0.6872	0.6596	0.7032	0.6888	0.6762
399	0.641	0.6526	0.6298	0.6606	0.6526	0.6595	0.6727	0.6447	0.6568	0.64	0.6386	0.6615	0.6668	0.6301	0.6753	0.6536	0.6595	0.6541	0.6426	0.664	0.6764	0.641	0.6825	0.6819	0.6483	0.6382	0.6371	0.6587	0.6675	0.6345	0.695	0.6923	0.6672	0.6544	0.6483	0.6845	0.6706	0.6445	0.695	0.686	0.6762	0.6645	0.6568	0.6838	0.6911	0.6649	0.7081	0.6942	0.682
403	0.6508	0.6593	0.6375	0.6666	0.6593	0.6649	0.6779	0.6527	0.6671	0.6475	0.6422	0.6691	0.6708	0.6368	0.6805	0.6647	0.6649	0.6618	0.6508	0.6709	0.6835	0.6508	0.6918	0.69	0.6553	0.6462	0.645	0.6672	0.6759	0.6425	0.7062	0.6993	0.6742	0.6602	0.6554	0.691	0.6774	0.6514	0.7028	0.6938	0.6812	0.6696	0.6628	0.689	0.6965	0.6709	0.72	0.7001	0.6863
407	0.6533	0.6562	0.6423	0.6671	0.6562	0.6722	0.6768	0.6537	0.6673	0.6491	0.6493	0.6715	0.6784	0.6411	0.6856	0.6597	0.6722	0.6636	0.6535	0.676	0.6883	0.6542	0.6944	0.6929	0.6629	0.6509	0.6524	0.6724	0.6817	0.6484	0.7099	0.7067	0.6793	0.664	0.6618	0.6948	0.6816	0.6553	0.7061	0.6976	0.685	0.6724	0.6675	0.6923	0.6996	0.6736	0.7169	0.7025	0.6904
411	0.6547	0.6613	0.6488	0.6709	0.6613	0.6774	0.6839	0.6626	0.6699	0.6542	0.6486	0.6726	0.6788	0.6475	0.6854	0.6695	0.6774	0.6686	0.6572	0.6809	0.6892	0.6552	0.6979	0.692	0.6829	0.6681	0.6683	0.6896	0.7013	0.6654	0.7275	0.7216	0.6786	0.6633	0.6635	0.6927	0.6826	0.6564	0.7071	0.6995	0.6821	0.6724	0.665	0.6911	0.6993	0.6742	0.7234	0.7042	0.6937
415	0.6621	0.6703	0.646	0.6793	0.6703	0.6824	0.6898	0.6637	0.6805	0.6588	0.6516	0.6732	0.6849	0.6529	0.6858	0.6793	0.6824	0.6723	0.663	0.6849	0.6956	0.6614	0.7049	0.6939	0.687	0.6743	0.6736	0.6967	0.7035	0.6684	0.7409	0.7237	0.6964	0.6803	0.6753	0.71	0.7002	0.6718	0.7249	0.716	0.6989	0.6848	0.6767	0.7021	0.711	0.6862	0.7285	0.7178	0.698
419	0.6683	0.6787	0.6513	0.6768	0.6787	0.6866	0.6995	0.6711	0.687	0.6667	0.6619	0.681	0.6897	0.659	0.6877	0.6785	0.6866	0.6771	0.6677	0.6913	0.7054	0.6673	0.7111	0.7019	0.6842	0.6688	0.6715	0.6931	0.701	0.6667	0.7406	0.7222	0.6832	0.6714	0.6687	0.7006	0.6892	0.663	0.7149	0.7058	0.6924	0.6829	0.6722	0.7027	0.7109	0.6834	0.729	0.7145	0.7058
423	0.6716	0.6788	0.6575	0.6882	0.6788	0.6927	0.699	0.6733	0.6809	0.6706	0.6616	0.6837	0.6913	0.6561	0.6975	0.6787	0.6927	0.6838	0.6703	0.697	0.7074	0.6689	0.7089	0.7015	0.6985	0.6845	0.6834	0.7076	0.7144	0.6711	0.7381	0.7235	0.7099	0.6902	0.6948	0.7201	0.7095	0.6812	0.731	0.7224	0.6935	0.6826	0.6784	0.7003	0.7117	0.6841	0.7315	0.7149	0.7061
427	0.6823	0.6849	0.6636	0.6918	0.6849	0.7006	0.7046	0.6881	0.6832	0.6708	0.6707	0.6874	0.7004	0.6598	0.6996	0.6917	0.7006	0.6846	0.6752	0.7059	0.7076	0.6717	0.7139	0.7157	0.7028	0.6865	0.6855	0.7113	0.7174	0.679	0.7448	0.7371	0.7106	0.691	0.692	0.7211	0.711	0.6817	0.7285	0.7207	0.6825	0.6755	0.6696	0.6944	0.7054	0.6812	0.7234	0.7084	0.7058
431	0.6804	0.6893	0.6576	0.6926	0.6893	0.699	0.7073	0.6843	0.6858	0.6818	0.6639	0.6909	0.6962	0.6659	0.7049	0.687	0.699	0.6914	0.6793	0.702	0.7136	0.6781	0.7144	0.7112	0.7053	0.6922	0.688	0.7139	0.7222	0.6824	0.743	0.7359	0.7181	0.7002	0.7003	0.7286	0.7151	0.6874	0.7367	0.7276	0.6934	0.6839	0.68	0.7028	0.7139	0.6873	0.7412	0.719	0.711
435	0.6812	0.69	0.6625	0.6979	0.69	0.7087	0.7166	0.6872	0.6901	0.6766	0.6727	0.6927	0.7109	0.6653	0.7106	0.7012	0.7087	0.6914	0.6824	0.7119	0.7181	0.674	0.7207	0.7202	0.7059	0.6903	0.6859	0.7164	0.7252	0.6821	0.7486	0.7434	0.7182	0.7012	0.6955	0.7338	0.7189	0.6881	0.7356	0.7282	0.7164	0.7034	0.6934	0.7238	0.7327	0.7044	0.7474	0.7343	0.7233
439	0.6756	0.7002	0.672	0.6967	0.7002	0.6956	0.7169	0.6994	0.7034	0.688	0.6787	0.7062	0.7121	0.6692	0.7166	0.7036	0.7072	0.6956	0.6857	0.7132	0.7188	0.681	0.7224	0.7259	0.6922	0.678	0.6809	0.7019	0.7125	0.671	0.7339	0.7305	0.7101	0.6967	0.6935	0.7286	0.712	0.6831	0.732	0.7241	0.7164	0.704	0.6975	0.7243	0.7322	0.7045	0.7467	0.7345	0.7263
443	0.68	0.6951	0.6685	0.7077	0.6951	0.6998	0.7232	0.6951	0.7085	0.6877	0.6835	0.7112	0.7165	0.6763	0.7173	0.7062	0.7162	0.6998	0.6922	0.7201	0.7237	0.6833	0.7278	0.7296	0.6979	0.6829	0.686	0.7107	0.7169	0.6755	0.7382	0.735	0.7189	0.7043	0.7037	0.7357	0.7202	0.6894	0.74	0.732	0.7062	0.6943	0.6922	0.7168	0.7267	0.6992	0.739	0.731	0.7267
447	0.6843	0.7048	0.6674	0.7074	0.7048	0.6866	0.7359	0.7077	0.7096	0.6976	0.6898	0.7135	0.7189	0.6792	0.7188	0.7043	0.6939	0.6866	0.6753	0.7048	0.7092	0.6714	0.7155	0.7162	0.7061	0.6975	0.6947	0.7236	0.7285	0.6893	0.7518	0.7481	0.7295	0.7159	0.7094	0.7488	0.7291	0.6989	0.7494	0.7403	0.728	0.7144	0.7078	0.7374	0.7446	0.7164	0.7626	0.7476	0.7382
451	0.6871	0.7089	0.6866	0.7118	0.7089	0.7054	0.7398	0.7111	0.7168	0.6997	0.6936	0.719	0.7278	0.6812	0.7249	0.7189	0.7189	0.7054	0.6945	0.7312	0.7324	0.6963	0.7362	0.7358	0.7234	0.7115	0.715	0.743	0.7472	0.7081	0.7647	0.7607	0.7357	0.7213	0.7164	0.7543	0.7374	0.7069	0.7544	0.7466	0.7343	0.7199	0.7143	0.7422	0.7501	0.7176	0.7601	0.7477	0.7354
455	0.6922	0.715	0.6828	0.7155	0.715	0.7143	0.7408	0.7131	0.7178	0.7049	0.7094	0.726	0.7316	0.6856	0.7301	0.7196	0.7188	0.7143	0.6994	0.7352	0.7365	0.701	0.7442	0.7458	0.7282	0.7202	0.7232	0.7506	0.7579	0.7175	0.769	0.7669	0.7386	0.7241	0.7235	0.7592	0.7422	0.7114	0.7588	0.7495	0.7348	0.7214	0.7157	0.7454	0.7547	0.7226	0.7649	0.7554	0.7477
459	0.7044	0.7228	0.7025	0.7239	0.7228	0.7313	0.7449	0.7171	0.7212	0.7163	0.7108	0.7339	0.7408	0.6974	0.7314	0.7232	0.7326	0.7313	0.7083	0.748	0.7532	0.7162	0.7576	0.7531	0.7205	0.7145	0.7176	0.7399	0.7503	0.7086	0.7656	0.7565	0.7326	0.7207	0.7265	0.7561	0.7413	0.711	0.7599	0.7466	0.7371	0.7286	0.724	0.7544	0.7645	0.7264	0.7747	0.7578	0.7494
463	0.7214	0.733	0.7087	0.7379	0.733	0.7382	0.7454	0.724	0.7356	0.7234	0.7205	0.7414	0.7534	0.7046	0.7336	0.7317	0.7448	0.7382	0.7207	0.7549	0.7582	0.7216	0.7629	0.7596	0.7342	0.7195	0.7236	0.7461	0.7529	0.7131	0.7708	0.767	0.7417	0.7303	0.7342	0.7635	0.7503	0.7195	0.7708	0.753	0.7247	0.724	0.7191	0.7472	0.7572	0.7204	0.7645	0.754	0.7511
467	0.7154	0.74	0.7124	0.7387	0.74	0.7297	0.752	0.7253	0.7434	0.7342	0.729	0.7481	0.7555	0.7125	0.7396	0.7333	0.7378	0.7297	0.7179	0.747	0.7514	0.7154	0.7585	0.7561	0.7366	0.7247	0.7269	0.7506	0.7563	0.7163	0.7794	0.7729	0.7535	0.74	0.7416	0.773	0.758	0.7259	0.7781	0.7651	0.7353	0.7295	0.7247	0.7518	0.7603	0.7289	0.7724	0.7582	0.7591
471	0.7286	0.7432	0.7163	0.7452	0.7432	0.7484	0.7612	0.7393	0.7477	0.7349	0.734	0.7494	0.7631	0.7131	0.7482	0.7462	0.7561	0.7484	0.7338	0.7668	0.7699	0.7283	0.7741	0.7743	0.7442	0.731	0.7336	0.7558	0.7615	0.7214	0.7834	0.7773	0.7599	0.7431	0.7447	0.7737	0.7613	0.7307	0.7833	0.7727	0.7419	0.7366	0.7318	0.7539	0.7663	0.7344	0.7783	0.769	0.7651
475	0.7329	0.7399	0.7171	0.7498	0.7399	0.7544	0.767	0.7508	0.7508	0.7377	0.7322	0.7522	0.7634	0.717	0.7581	0.7519	0.7587	0.7544	0.7381	0.7687	0.7738	0.7294	0.7762	0.771	0.7496	0.7349	0.7352	0.7604	0.7667	0.7276	0.789	0.7791	0.7626	0.7455	0.7468	0.7755	0.7638	0.7333	0.7847	0.7748	0.743	0.7367	0.733	0.7557	0.7681	0.7377	0.7794	0.7717	0.7676
479	0.7323	0.7551	0.7118	0.7537	0.7551	0.7414	0.7729	0.7506	0.7484	0.7398	0.7358	0.7578	0.7657	0.718	0.7609	0.7459	0.7486	0.7414	0.7283	0.7582	0.7629	0.7249	0.7701	0.7661	0.7521	0.7385	0.7389	0.7649	0.7703	0.7308	0.7939	0.7872	0.7694	0.7535	0.7538	0.784	0.7714	0.74	0.7922	0.7833	0.7513	0.7432	0.7384	0.764	0.774	0.7434	0.7854	0.7808	0.7758
483	0.7397	0.7445	0.7199	0.7542	0.7445	0.7589	0.7756	0.7627	0.7576	0.7502	0.7431	0.7594	0.7728	0.7291	0.7713	0.7492	0.768	0.7589	0.7435	0.7772	0.7785	0.7358	0.7798	0.778	0.7633	0.7462	0.7472	0.7709	0.7787	0.7369	0.8008	0.7953	0.7716	0.7543	0.7565	0.7832	0.7738	0.7415	0.7943	0.7844	0.7478	0.7438	0.7377	0.7596	0.7736	0.7435	0.7868	0.7782	0.772
487	0.7438	0.7465	0.7207	0.7542	0.7465	0.7605	0.7773	0.7661	0.7622	0.7525	0.7428	0.7608	0.7807	0.7328	0.7737	0.7525	0.772	0.7605	0.7457	0.7789	0.7793	0.7392	0.7812	0.7805	0.7647	0.7479	0.7478	0.7711	0.7806	0.7401	0.8067	0.7974	0.7746	0.7573	0.7588	0.7866	0.7769	0.7449	0.7965	0.7885	0.753	0.7482	0.7424	0.7658	0.7782	0.7482	0.79	0.7832	0.7793
491	0.7444	0.7605	0.7336	0.7647	0.7605	0.763	0.7843	0.7678	0.7647	0.7537	0.7462	0.7681	0.7858	0.741	0.7769	0.7631	0.7756	0.763	0.7527	0.7831	0.7855	0.7431	0.7866	0.7822	0.7688	0.7497	0.7528	0.7775	0.7849	0.7452	0.8079	0.7983	0.7815	0.7634	0.765	0.7944	0.7825	0.75	0.8031	0.7935	0.7616	0.7552	0.7506	0.7724	0.7859	0.7561	0.7983	0.789	0.7849
495	0.7465	0.7582	0.7335	0.7669	0.7582	0.7683	0.788	0.7765	0.7717	0.7559	0.75	0.7693	0.7831	0.74	0.7846	0.759	0.7791	0.7683	0.753	0.7879	0.7868	0.7484	0.7893	0.7882	0.7732	0.7536	0.756	0.7798	0.7863	0.7438	0.8071	0.7989	0.7812	0.7649	0.7654	0.7929	0.7865	0.7546	0.8057	0.8006	0.7639	0.7601	0.7543	0.7758	0.789	0.7605	0.8027	0.7915	0.7783
499	0.7492	0.7679	0.7286	0.7691	0.7679	0.7685	0.7914	0.7696	0.7688	0.7568	0.754	0.7735	0.7906	0.7362	0.7866	0.7712	0.7839	0.7685	0.7551	0.7897	0.7937	0.7502	0.7926	0.7858	0.7749	0.7547	0.7602	0.7837	0.7908	0.7484	0.8143	0.8009	0.7833	0.7657	0.7673	0.7967	0.7873	0.7532	0.8072	0.7986	0.7818	0.7743	0.765	0.7909	0.8024	0.7706	0.8138	0.8072	0.7992
503	0.75	0.7715	0.7356	0.7734	0.7715	0.7684	0.794	0.7689	0.7773	0.7564	0.7544	0.7779	0.7841	0.7388	0.7825	0.7755	0.7841	0.7684	0.7596	0.7897	0.7973	0.7517	0.7962	0.7896	0.7736	0.7559	0.7618	0.7842	0.7914	0.7482	0.8139	0.8019	0.7866	0.7689	0.7687	0.7987	0.7896	0.7539	0.8079	0.7996	0.7862	0.7779	0.7697	0.7951	0.807	0.7755	0.8194	0.8088	0.8016
507	0.7542	0.7642	0.7365	0.7735	0.7672	0.7661	0.7983	0.7833	0.7772	0.762	0.7584	0.7801	0.7939	0.7447	0.7906	0.7672	0.7823	0.7661	0.7615	0.7955	0.795	0.7512	0.7994	0.791	0.781	0.7599	0.7642	0.7866	0.7962	0.7509	0.818	0.8066	0.7872	0.7712	0.7719	0.8013	0.7919	0.7575	0.8114	0.8021	0.7883	0.778	0.7711	0.7959	0.8091	0.7774	0.8209	0.8092	0.8041
511	0.754	0.769	0.7434	0.7831	0.7773	0.7747	0.7959	0.7743	0.7776	0.7677	0.7692	0.7879	0.7935	0.7468	0.7929	0.7819	0.7863	0.7747	0.7608	0.7949	0.804	0.76	0.8071	0.8047	0.7823	0.7648	0.769	0.7903	0.7991	0.7563	0.8297	0.8202	0.7765	0.7672	0.7657	0.7965	0.7871	0.7506	0.8038	0.7997	0.7805	0.7753	0.7652	0.7965	0.8066	0.7798	0.8302	0.8135	0.7993
515	0.7578	0.7806	0.7464	0.7854	0.7806	0.7733	0.8047	0.7813	0.787	0.7657	0.762	0.7901	0.7964	0.7483	0.7986	0.781	0.7847	0.7733	0.7645	0.7995	0.8104	0.761	0.8076	0.8119	0.7843	0.7659	0.7707	0.7927	0.8021	0.7587	0.827	0.8225	0.776	0.7667	0.7652	0.7958	0.7886	0.7522	0.8051	0.7993	0.7815	0.7783	0.7667	0.7985	0.8085	0.7785	0.8257	0.8174	0.7998
519	0.7707	0.7805	0.7573	0.783	0.7805	0.7786	0.8087	0.7846	0.7908	0.7773	0.7663	0.7943	0.8013	0.7489	0.8032	0.7849	0.7925	0.7786	0.7671	0.8025	0.8063	0.7623	0.8088	0.8091	0.7877	0.7733	0.7723	0.7958	0.806	0.7659	0.842	0.8184	0.7832	0.7745	0.7717	0.8054	0.7984	0.7676	0.8168	0.8108	0.7857	0.783	0.7716	0.8028	0.815	0.7916	0.8339	0.8204	0.8025
523	0.7572	0.7803	0.7622	0.7793	0.7803	0.7847	0.8149	0.7902	0.7937	0.7823	0.7698	0.7978	0.7984	0.7528	0.8018	0.7851	0.7931	0.7847	0.7659	0.8031	0.8069	0.7708	0.813	0.8133	0.7863	0.7725	0.7741	0.7957	0.8076	0.7679	0.8313	0.8191	0.7983	0.7874	0.785	0.8206	0.8112	0.7809	0.8352	0.825	0.7996	0.795	0.784	0.8136	0.8299	0.8058	0.8455	0.8318	0.8118
527	0.7567	0.7894	0.765	0.7886	0.7894	0.7869	0.8132	0.7919	0.8005	0.7847	0.7744	0.8007	0.8021	0.7612	0.8017	0.7763	0.7934	0.7869	0.7732	0.8049	0.8159	0.7733	0.8167	0.8127	0.7876	0.7741	0.7745	0.799	0.8113	0.773	0.8364	0.8261	0.7852	0.7772	0.7757	0.8101	0.8029	0.7712	0.8245	0.8166	0.7899	0.7883	0.7759	0.8073	0.8215	0.7951	0.8369	0.8282	0.8095
531	0.7689	0.7963	0.7648	0.7908	0.7963	0.7859	0.8162	0.8023	0.7979	0.7844	0.7772	0.8	0.8045	0.762	0.8036	0.7807	0.8012	0.7859	0.7776	0.8069	0.8173	0.7745	0.817	0.8129	0.7899	0.7767	0.7774	0.8002	0.8113	0.7725	0.8344	0.8298	0.788	0.7795	0.7769	0.8125	0.8054	0.775	0.827	0.8191	0.7924	0.7915	0.7801	0.8104	0.8249	0.7969	0.8412	0.831	0.8093
535	0.7715	0.8012	0.7654	0.7946	0.8012	0.7893	0.8178	0.7865	0.8008	0.784	0.7754	0.7995	0.8086	0.7681	0.8034	0.7878	0.8035	0.7893	0.7802	0.8097	0.8192	0.7746	0.8189	0.818	0.7899	0.7783	0.7765	0.8006	0.812	0.7709	0.8456	0.828	0.7891	0.7813	0.776	0.8149	0.8033	0.7755	0.8304	0.8192	0.7956	0.7937	0.7807	0.8123	0.826	0.7979	0.844	0.8322	0.8155
539	0.7767	0.8058	0.7666	0.795	0.8058	0.793	0.8159	0.7985	0.8021	0.7833	0.7784	0.8064	0.819	0.7655	0.8047	0.7944	0.8048	0.793	0.785	0.8132	0.8241	0.7768	0.8239	0.8203	0.795	0.7836	0.7808	0.805	0.8159	0.7755	0.8506	0.831	0.7927	0.7833	0.7805	0.8162	0.8075	0.7814	0.833	0.8238	0.7964	0.796	0.7845	0.8145	0.83	0.8016	0.8465	0.8386	0.8141
543	0.7765	0.8006	0.7637	0.7984	0.8006	0.7931	0.8153	0.7803	0.8062	0.7886	0.7819	0.8084	0.8174	0.7736	0.8213	0.7905	0.8078	0.7931	0.7873	0.8151	0.8229	0.7786	0.8239	0.8204	0.8001	0.7861	0.7833	0.8101	0.8178	0.7761	0.8467	0.8299	0.8002	0.7901	0.7861	0.8235	0.8122	0.7819	0.8411	0.8301	0.7998	0.8018	0.7877	0.8182	0.8324	0.8009	0.8507	0.8395	0.8149
547	0.7746	0.804	0.7668	0.8107	0.804	0.7966	0.8209	0.8085	0.7955	0.7922	0.7865	0.8098	0.8188	0.773	0.8183	0.7968	0.8082	0.7966	0.7871	0.8167	0.8217	0.7849	0.8238	0.8222	0.7986	0.7871	0.7857	0.8123	0.8187	0.7754	0.8392	0.8305	0.7976	0.7894	0.7859	0.8188	0.8113	0.7783	0.8403	0.8277	0.802	0.805	0.7872	0.8223	0.8337	0.7992	0.8554	0.8406	0.8223
551	0.7703	0.8063	0.7695	0.8078	0.8063	0.8001	0.8265	0.8012	0.8066	0.7949	0.7849	0.8087	0.8185	0.7749	0.8223	0.7924	0.8125	0.8001	0.7893	0.8169	0.8218	0.7856	0.8285	0.8258	0.8021	0.7905	0.7885	0.812	0.8231	0.7791	0.8428	0.8364	0.8005	0.7912	0.7883	0.8233	0.8141	0.782	0.8431	0.8313	0.8047	0.8061	0.7909	0.8254	0.8362	0.8035	0.8537	0.8427	0.8243
555	0.7813	0.8112	0.7704	0.8047	0.8112	0.7994	0.8281	0.8017	0.8085	0.7926	0.7922	0.8153	0.8277	0.7782	0.8207	0.7969	0.8129	0.7994	0.7945	0.8229	0.827	0.7822	0.8275	0.829	0.8018	0.7908	0.7888	0.8136	0.8245	0.7797	0.8564	0.8373	0.8019	0.7926	0.7907	0.826	0.8161	0.787	0.8439	0.8337	0.8031	0.8068	0.7915	0.8232	0.8378	0.8083	0.8532	0.8443	0.8252
559	0.7794	0.8101	0.7791	0.809	0.8101	0.8021	0.8291	0.8057	0.8159	0.7993	0.7881	0.8185	0.8258	0.7784	0.8266	0.7896	0.8149	0.8021	0.7969	0.8201	0.8249	0.7831	0.829	0.8289	0.8045	0.7909	0.7899	0.8152	0.8237	0.7773	0.8465	0.8348	0.8037	0.7942	0.7921	0.8276	0.8174	0.7861	0.8476	0.8361	0.8084	0.8115	0.7942	0.8303	0.8405	0.8033	0.8552	0.842	0.8317
563	0.7856	0.8143	0.7781	0.8134	0.8143	0.8027	0.8346	0.8095	0.8095	0.7938	0.7891	0.8172	0.8231	0.777	0.8232	0.805	0.8149	0.8027	0.7981	0.8267	0.8295	0.7858	0.8315	0.8278	0.8071	0.7945	0.7934	0.8176	0.8306	0.7845	0.8602	0.8414	0.8097	0.7994	0.7983	0.8326	0.8252	0.795	0.85	0.8394	0.7943	0.7987	0.7871	0.8144	0.8321	0.803	0.8485	0.8395	0.8226
567	0.7837	0.8127	0.7791	0.8054	0.8127	0.8095	0.8304	0.8041	0.8113	0.8016	0.7989	0.8238	0.8363	0.7791	0.8355	0.8051	0.8158	0.8095	0.7998	0.8244	0.8341	0.7877	0.8305	0.8292	0.8095	0.7951	0.7936	0.8224	0.8302	0.7831	0.8553	0.8422	0.8078	0.799	0.7971	0.8319	0.8231	0.7897	0.8513	0.8387	0.8127	0.8149	0.7998	0.8347	0.8453	0.811	0.8644	0.8503	0.8322
571	0.7906	0.8172	0.7808	0.8117	0.8172	0.8073	0.8317	0.8126	0.8144	0.7992	0.7912	0.8203	0.8318	0.7833	0.8345	0.8093	0.8229	0.8073	0.8015	0.8302	0.8346	0.7938	0.8387	0.8384	0.8096	0.7966	0.7964	0.8215	0.8332	0.7867	0.8639	0.8432	0.8084	0.7992	0.7976	0.8343	0.8243	0.7959	0.8525	0.8407	0.8126	0.8148	0.8007	0.8343	0.8453	0.8142	0.8622	0.8497	0.836
575	0.7904	0.8193	0.7792	0.8169	0.8193	0.8084	0.8331	0.806	0.8171	0.8034	0.7981	0.8249	0.8418	0.7808	0.8352	0.8075	0.8252	0.8084	0.806	0.8278	0.8347	0.7886	0.8402	0.8314	0.81	0.799	0.7991	0.8245	0.8362	0.7921	0.8669	0.8489	0.8195	0.8092	0.8048	0.8421	0.8325	0.8015	0.8615	0.8496	0.8101	0.8119	0.801	0.8317	0.8439	0.8127	0.8625	0.8525	0.8331
579	0.7901	0.8178	0.7795	0.8194	0.8178	0.8099	0.8363	0.8138	0.8185	0.8093	0.8009	0.8233	0.8403	0.7865	0.8333	0.8074	0.821	0.8099	0.8051	0.8317	0.8341	0.7933	0.8399	0.8351	0.8121	0.8013	0.7987	0.8253	0.836	0.7881	0.8561	0.849	0.8208	0.8121	0.8071	0.8435	0.8346	0.8002	0.8644	0.851	0.8146	0.8166	0.8014	0.8333	0.8468	0.8122	0.8629	0.8541	0.8336
583	0.7969	0.8164	0.7885	0.8141	0.8164	0.8089	0.8385	0.8195	0.8169	0.8121	0.8001	0.8275	0.8384	0.786	0.8418	0.8126	0.819	0.8089	0.8038	0.8282	0.835	0.7901	0.8362	0.8304	0.8056	0.7972	0.7938	0.8207	0.8356	0.7918	0.86	0.8507	0.8141	0.8069	0.8023	0.8407	0.8287	0.7973	0.8589	0.8462	0.8241	0.826	0.807	0.8435	0.8539	0.8216	0.8757	0.8588	0.8364
587	0.7904	0.8288	0.7793	0.8146	0.8288	0.8134	0.8453	0.8236	0.8211	0.8095	0.8022	0.8295	0.8414	0.788	0.8356	0.8113	0.8215	0.8134	0.8096	0.8334	0.8396	0.7958	0.8414	0.8413	0.814	0.8041	0.8013	0.8291	0.8394	0.7904	0.8641	0.8535	0.8244	0.8149	0.8101	0.847	0.8389	0.8025	0.8668	0.853	0.8135	0.8172	0.8035	0.835	0.8488	0.8151	0.8667	0.8554	0.8359
591	0.7882	0.8196	0.7786	0.8197	0.8196	0.816	0.8441	0.8111	0.8252	0.8086	0.8028	0.834	0.8429	0.7858	0.8374	0.8135	0.8254	0.816	0.8104	0.8367	0.8399	0.799	0.839	0.8365	0.8147	0.8053	0.8046	0.8277	0.8406	0.7942	0.8656	0.8556	0.8256	0.8165	0.8118	0.8478	0.8408	0.8043	0.8694	0.856	0.8156	0.8199	0.8053	0.8345	0.8515	0.8162	0.8708	0.8575	0.8352
595	0.7923	0.8239	0.7827	0.8221	0.8239	0.8181	0.8487	0.8164	0.8253	0.8105	0.8001	0.8282	0.8499	0.7944	0.8481	0.8135	0.8283	0.8181	0.8079	0.8375	0.8418	0.799	0.8407	0.8421	0.8162	0.8064	0.8046	0.8323	0.8425	0.7945	0.8666	0.8579	0.8257	0.8162	0.8125	0.848	0.8404	0.8062	0.8702	0.8556	0.8166	0.8193	0.8042	0.8376	0.8509	0.8175	0.8684	0.8589	0.8343
599	0.8037	0.8019	0.7841	0.8252	0.8245	0.817	0.8405	0.817	0.8196	0.8159	0.8017	0.8409	0.8428	0.7933	0.8447	0.8203	0.827	0.817	0.8124	0.8322	0.8411	0.7986	0.8429	0.8378	0.8123	0.8039	0.8019	0.8277	0.8389	0.7919	0.8649	0.8536	0.8298	0.8205	0.8163	0.8527	0.8443	0.807	0.8744	0.8581	0.8229	0.8248	0.8096	0.8437	0.8547	0.8199	0.8743	0.8616	0.8435
603	0.7987	0.8101	0.7871	0.8252	0.8249	0.8234	0.8505	0.814	0.8253	0.8184	0.8105	0.8381	0.849	0.7923	0.8436	0.8096	0.8352	0.8234	0.8168	0.8397	0.8453	0.7982	0.8469	0.8445	0.821	0.813	0.8101	0.8375	0.8459	0.8007	0.8742	0.8595	0.8303	0.8214	0.8171	0.8529	0.8468	0.8097	0.8748	0.8591	0.8212	0.8242	0.8117	0.8444	0.8557	0.8236	0.8745	0.863	0.8415
607	0.7963	0.8094	0.7903	0.8193	0.8207	0.8236	0.8479	0.8186	0.8259	0.8144	0.809	0.8345	0.8536	0.7984	0.8439	0.8198	0.8319	0.8236	0.8169	0.8447	0.8484	0.8062	0.8513	0.8468	0.8214	0.8112	0.8094	0.8367	0.8486	0.801	0.8698	0.8622	0.831	0.8232	0.8201	0.8544	0.847	0.8123	0.8767	0.8621	0.8255	0.8276	0.8141	0.846	0.8588	0.8233	0.8755	0.8614	0.8478
611	0.7988	0.8241	0.789	0.8306	0.826	0.8211	0.8473	0.8184	0.8253	0.8182	0.8087	0.837	0.8483	0.7982	0.847	0.8178	0.8343	0.8211	0.8157	0.841	0.8479	0.8041	0.8473	0.8456	0.8378	0.826	0.8241	0.8489	0.8637	0.8114	0.8844	0.87	0.8426	0.831	0.8284	0.8618	0.8574	0.8199	0.8837	0.8686	0.8297	0.8334	0.8187	0.8494	0.8627	0.8285	0.8806	0.8665	0.8427
615	0.7995	0.8243	0.7916	0.8292	0.8243	0.8251	0.847	0.8273	0.8288	0.8211	0.8118	0.8454	0.8515	0.803	0.8468	0.8273	0.8361	0.8251	0.8235	0.8461	0.8495	0.8083	0.8508	0.8522	0.8248	0.8152	0.8127	0.8389	0.8508	0.801	0.8767	0.863	0.8342	0.8268	0.8222	0.8593	0.8514	0.8165	0.8794	0.8648	0.831	0.8331	0.8187	0.8503	0.8629	0.8272	0.8801	0.865	0.8508
619	0.804	0.8817	0.7943	0.8329	0.823	0.8274	0.8438	0.8187	0.8393	0.8208	0.8144	0.8365	0.8596	0.7967	0.8508	0.822	0.8355	0.8274	0.8218	0.8455	0.8507	0.8062	0.8535	0.8537	0.825	0.8166	0.8131	0.8411	0.8528	0.803	0.8783	0.8645	0.8351	0.8273	0.8235	0.861	0.8532	0.8176	0.8828	0.8663	0.8299	0.8346	0.8197	0.852	0.8649	0.8295	0.8817	0.8667	0.8522
623	0.8066	0.882	0.8003	0.83	0.8477	0.8292	0.855	0.8233	0.8321	0.8193	0.8169	0.8395	0.8565	0.8017	0.8465	0.829	0.8338	0.8292	0.8204	0.8464	0.8538	0.8105	0.8545	0.8525	0.8265	0.8171	0.8167	0.8406	0.8561	0.8048	0.8779	0.8666	0.838	0.83	0.8251	0.861	0.8567	0.8194	0.8834	0.8696	0.8316	0.8357	0.8214	0.8528	0.8658	0.8299	0.882	0.8672	0.8538
627	0.8069	0.8829	0.7952	0.832	0.8326	0.8311	0.8549	0.8217	0.8302	0.8204	0.822	0.8406	0.8544	0.7992	0.8477	0.8262	0.8401	0.8311	0.8236	0.8475	0.8563	0.8097	0.8537	0.8529	0.8285	0.8203	0.8168	0.8431	0.8569	0.8072	0.8777	0.8679	0.8384	0.8297	0.8275	0.8628	0.8567	0.8211	0.8829	0.87	0.8327	0.8375	0.8231	0.8532	0.8675	0.8312	0.8829	0.8683	0.8547
631	0.8104	0.8875	0.7879	0.8309	0.8251	0.8334	0.8593	0.824	0.8385	0.824	0.8243	0.8414	0.8546	0.8035	0.8507	0.8218	0.841	0.8334	0.8235	0.8504	0.8593	0.8132	0.8546	0.8539	0.8326	0.8215	0.8206	0.8463	0.8584	0.8087	0.8836	0.8702	0.8389	0.8327	0.8284	0.8665	0.8587	0.8219	0.8867	0.8707	0.8349	0.8398	0.824	0.8584	0.8712	0.8343	0.8875	0.8716	0.8566
635	0.8064	0.8892	0.805	0.8409	0.8438	0.8354	0.8483	0.8243	0.8395	0.8226	0.8215	0.8469	0.8592	0.8041	0.8517	0.8364	0.8397	0.8354	0.8281	0.8504	0.859	0.8145	0.8574	0.8538	0.8307	0.8201	0.8186	0.8455	0.8595	0.8106	0.8845	0.8692	0.8414	0.8346	0.8289	0.8672	0.8593	0.8241	0.8878	0.8738	0.8374	0.8407	0.8263	0.8598	0.8715	0.8357	0.8892	0.8727	0.8582
639	0.8094	0.8896	0.8019	0.8385	0.8418	0.8353	0.86	0.8295	0.8371	0.8301	0.8231	0.8438	0.8631	0.8049	0.8576	0.8316	0.8395	0.8353	0.8281	0.8565	0.8617	0.8153	0.8599	0.857	0.8323	0.8243	0.8215	0.8469	0.8609	0.8103	0.8844	0.87	0.8431	0.8353	0.8316	0.868	0.8596	0.8262	0.8886	0.8759	0.8366	0.8438	0.8269	0.8583	0.8747	0.839	0.8896	0.8762	0.8591
643	0.8075	0.8928	0.8012	0.8355	0.8409	0.8366	0.8657	0.8397	0.8315	0.832	0.8222	0.8483	0.8672	0.8104	0.8595	0.8333	0.8425	0.8366	0.8283	0.855	0.8611	0.821	0.8675	0.8598	0.834	0.8249	0.8223	0.8496	0.8629	0.8157	0.8848	0.8746	0.844	0.8369	0.8328	0.8703	0.8627	0.8272	0.8938	0.8771	0.8362	0.8443	0.8302	0.8631	0.8757	0.8409	0.8928	0.8779	0.8611
647	0.8172	0.8935	0.7999	0.8401	0.8375	0.8431	0.8594	0.8459	0.8396	0.8321	0.8307	0.8549	0.8572	0.8087	0.8584	0.8312	0.8457	0.8431	0.8357	0.8595	0.8675	0.8198	0.8644	0.8618	0.836	0.827	0.826	0.8518	0.8677	0.8162	0.8928	0.8777	0.846	0.8383	0.835	0.871	0.8664	0.8285	0.8939	0.8757	0.8385	0.8453	0.8296	0.8638	0.8782	0.8403	0.8935	0.8768	0.8624
651	0.8056	0.8929	0.8099	0.8446	0.8462	0.8417	0.8717	0.8472	0.8403	0.8316	0.8293	0.8521	0.8687	0.8173	0.8658	0.84	0.8491	0.8417	0.8352	0.8565	0.8628	0.8223	0.8675	0.864	0.8349	0.8295	0.8276	0.8557	0.8671	0.8222	0.8944	0.8816	0.8474	0.8398	0.8367	0.8727	0.8666	0.8316	0.8953	0.8803	0.8387	0.8441	0.8294	0.8636	0.8765	0.8424	0.8929	0.8765	0.8637
655	0.8106	0.8988	0.8067	0.841	0.8399	0.8418	0.8623	0.8448	0.8463	0.8338	0.8244	0.8589	0.8718	0.8193	0.8653	0.842	0.8495	0.8418	0.8409	0.8623	0.8676	0.8215	0.8733	0.8685	0.8396	0.8307	0.8299	0.8584	0.8686	0.8212	0.896	0.8792	0.8497	0.8435	0.8388	0.878	0.8717	0.8339	0.8979	0.8819	0.8455	0.8474	0.8363	0.8692	0.8825	0.8465	0.8988	0.881	0.867
659	0.8127	0.8999	0.8061	0.8456	0.8383	0.8416	0.8626	0.828	0.8462	0.8371	0.8306	0.8646	0.8633	0.815	0.8638	0.8446	0.8502	0.8416	0.8378	0.8647	0.8672	0.8226	0.8699	0.8666	0.8397	0.8305	0.8296	0.8551	0.8683	0.8192	0.8952	0.8785	0.8498	0.8435	0.8383	0.8779	0.8701	0.8349	0.8995	0.8846	0.8477	0.85	0.8359	0.8711	0.885	0.8487	0.8999	0.8853	0.868
663	0.8132	0.9021	0.819	0.8485	0.8442	0.849	0.8675	0.8528	0.8495	0.8371	0.8245	0.8597	0.8668	0.8191	0.8671	0.8458	0.856	0.849	0.8396	0.8644	0.8743	0.8292	0.8763	0.869	0.8404	0.8325	0.8327	0.8584	0.8707	0.8288	0.9008	0.882	0.8519	0.8455	0.8411	0.8812	0.8721	0.8397	0.8999	0.887	0.8447	0.8507	0.8393	0.8715	0.8872	0.8528	0.9021	0.8861	0.8686
667	0.8149	0.9036	0.811	0.8538	0.8428	0.8466	0.8682	0.8426	0.8483	0.8365	0.8234	0.8607	0.8716	0.8175	0.8703	0.8482	0.8523	0.8466	0.8382	0.863	0.8725	0.8262	0.8715	0.8671	0.843	0.8336	0.8331	0.861	0.8717	0.8315	0.8984	0.8838	0.8526	0.8466	0.8423	0.881	0.8732	0.8384	0.9007	0.8878	0.8458	0.8508	0.838	0.8731	0.8863	0.8535	0.9036	0.8873	0.8695
671	0.8173	0.9063	0.8126	0.8522	0.8433	0.8489	0.8686	0.8332	0.8552	0.8414	0.8339	0.8595	0.869	0.8237	0.8661	0.8538	0.8547	0.8489	0.8427	0.8641	0.8738	0.8284	0.8791	0.8761	0.8445	0.8343	0.8344	0.8594	0.8777	0.8283	0.9048	0.8843	0.8553	0.8495	0.8435	0.8836	0.8771	0.8428	0.9044	0.8902	0.8511	0.855	0.8396	0.8751	0.8918	0.8531	0.9063	0.8879	0.8718
675	0.8174	0.9054	0.8222	0.8568	0.8581	0.8515	0.8832	0.8569	0.8577	0.8397	0.8303	0.8591	0.8745	0.8236	0.8698	0.8435	0.8572	0.8515	0.8412	0.8704	0.8796	0.8328	0.8788	0.8725	0.8451	0.8399	0.8405	0.8652	0.8813	0.8408	0.904	0.8954	0.8564	0.8503	0.8472	0.8861	0.8782	0.8504	0.9051	0.8905	0.8452	0.8515	0.84	0.8728	0.8906	0.8565	0.9054	0.8892	0.8718
679	0.8172	0.9099	0.824	0.8465	0.8501	0.8494	0.8651	0.8536	0.8572	0.841	0.8369	0.8613	0.8732	0.8287	0.8691	0.852	0.8602	0.8494	0.8451	0.8722	0.8801	0.8349	0.8793	0.872	0.8472	0.8384	0.8366	0.8638	0.8789	0.8331	0.9022	0.8909	0.8578	0.8517	0.8473	0.8865	0.8792	0.8449	0.9069	0.8929	0.8528	0.8567	0.8451	0.8786	0.8939	0.8602	0.9099	0.8912	0.8746
683	0.813	0.9103	0.8137	0.8627	0.8578	0.8508	0.8702	0.8506	0.8569	0.8457	0.836	0.864	0.8722	0.828	0.8699	0.8544	0.8595	0.8508	0.8442	0.8704	0.8875	0.8355	0.8791	0.876	0.848	0.838	0.838	0.8651	0.878	0.8345	0.9048	0.8872	0.8581	0.8524	0.8476	0.8892	0.8786	0.8448	0.905	0.8887	0.8558	0.8576	0.8476	0.879	0.8968	0.862	0.9103	0.8926	0.864
687	0.8165	0.912	0.8225	0.8525	0.8499	0.8497	0.8818	0.8601	0.8528	0.8477	0.8364	0.8655	0.8756	0.8222	0.8776	0.8516	0.8572	0.8497	0.8478	0.8703	0.8828	0.8379	0.8842	0.878	0.8498	0.8409	0.8407	0.8675	0.8787	0.8344	0.9064	0.8893	0.8596	0.8541	0.8494	0.8891	0.8801	0.8478	0.9087	0.8963	0.8546	0.8599	0.8468	0.8812	0.898	0.8619	0.912	0.8954	0.8775
691	0.8241	0.9137	0.8225	0.8592	0.8578	0.8573	0.8799	0.8545	0.86	0.8506	0.8355	0.8606	0.8798	0.8299	0.8699	0.8458	0.8602	0.8573	0.8463	0.8761	0.8837	0.8352	0.886	0.8743	0.8533	0.8425	0.8431	0.8701	0.8815	0.8432	0.9064	0.8945	0.8617	0.8582	0.852	0.8914	0.884	0.8533	0.9107	0.8959	0.8566	0.8588	0.8509	0.8832	0.9013	0.8667	0.9137	0.8974	0.8795
695	0.8235	0.9151	0.8259	0.8567	0.8596	0.8576	0.8838	0.8609	0.854	0.8495	0.8337	0.8649	0.8753	0.8345	0.8747	0.8547	0.8701	0.8576	0.8471	0.88	0.8845	0.8406	0.8869	0.8831	0.856	0.8449	0.8464	0.8721	0.8861	0.8429	0.9116	0.896	0.8625	0.8595	0.8541	0.8946	0.8864	0.8569	0.9118	0.8988	0.8577	0.8604	0.8515	0.8841	0.9028	0.8694	0.9151	0.9004	0.8815
699	0.8309	0.9177	0.8262	0.8494	0.8679	0.8561	0.8817	0.8601	0.8569	0.844	0.8359	0.8656	0.8768	0.827	0.878	0.8542	0.8625	0.8561	0.8541	0.8772	0.8889	0.8406	0.8851	0.8779	0.8518	0.8437	0.8435	0.871	0.8827	0.84	0.9169	0.8944	0.8616	0.8593	0.854	0.8956	0.8864	0.8572	0.9121	0.8972	0.8592	0.8619	0.8544	0.8853	0.9035	0.8707	0.9177	0.9026	0.8829
703	0.8409	0.9209	0.8287	0.8586	0.8595	0.863	0.8715	0.8626	0.8604	0.849	0.8369	0.8727	0.8805	0.8396	0.8848	0.852	0.8626	0.863	0.8494	0.875	0.8902	0.8441	0.8901	0.8778	0.8566	0.8487	0.8467	0.8743	0.8879	0.8443	0.9174	0.8958	0.8642	0.8614	0.8567	0.8962	0.8897	0.8596	0.9123	0.8983	0.8587	0.8629	0.8537	0.8852	0.9041	0.8733	0.9209	0.9027	0.8843
707	0.8242	0.9184	0.8264	0.8615	0.8585	0.8577	0.8866	0.8567	0.866	0.8534	0.8365	0.8691	0.8812	0.8351	0.8805	0.8655	0.8663	0.8577	0.8485	0.8762	0.8886	0.8468	0.887	0.8802	0.8525	0.8455	0.8456	0.8746	0.8879	0.8421	0.9101	0.8927	0.8638	0.8612	0.8575	0.8974	0.8886	0.8585	0.9113	0.8997	0.8594	0.8625	0.8548	0.8872	0.9037	0.8733	0.9184	0.8991	0.8852
711	0.8419	0.919	0.8278	0.8662	0.8653	0.8609	0.8966	0.8545	0.8661	0.8512	0.8389	0.8725	0.8879	0.8323	0.8854	0.868	0.8681	0.8609	0.8532	0.8828	0.8954	0.8459	0.8942	0.8803	0.8592	0.8508	0.8513	0.877	0.8891	0.8455	0.9182	0.8941	0.8668	0.8633	0.8617	0.8996	0.8932	0.8616	0.9125	0.8993	0.8605	0.8649	0.8558	0.8892	0.9057	0.8759	0.919	0.8982	0.8859
715	0.8332	0.9174	0.8384	0.8651	0.8665	0.8675	0.8855	0.8444	0.8615	0.8577	0.8437	0.8743	0.8906	0.83	0.8916	0.8623	0.874	0.8675	0.8501	0.884	0.8982	0.8469	0.8927	0.879	0.8617	0.8512	0.8503	0.8785	0.8909	0.8422	0.9162	0.8955	0.8661	0.864	0.8609	0.9013	0.8909	0.8595	0.9079	0.898	0.8606	0.8641	0.8551	0.8894	0.9075	0.8752	0.9174	0.8994	0.8868
719	0.8311	0.9258	0.8254	0.8697	0.8622	0.8661	0.8901	0.8473	0.8589	0.8577	0.838	0.8763	0.8764	0.828	0.8844	0.8696	0.8769	0.8661	0.8522	0.8854	0.9012	0.8427	0.8927	0.8731	0.8613	0.8528	0.8533	0.8791	0.8917	0.8426	0.9116	0.8992	0.866	0.8647	0.8616	0.9024	0.8908	0.8584	0.9078	0.9001	0.8612	0.8637	0.8576	0.8904	0.9062	0.8753	0.9258	0.9013	0.8865
[truncated: 47 more columns]

## Sheet: gradient culture of E. coli
DATA(x)	A1_DATA(y)	B1_DATA(y)	C1_DATA(y)	D1_DATA(y)	E1_DATA(y)	F1_DATA(y)	G1_DATA(y)	H1_DATA(y)	A2_DATA(y)	B2_DATA(y)	C2_DATA(y)	D2_DATA(y)	E2_DATA(y)	F2_DATA(y)	G2_DATA(y)	H2_DATA(y)	A3_DATA(y)	B3_DATA(y)	C3_DATA(y)	D3_DATA(y)	E3_DATA(y)	F3_DATA(y)	G3_DATA(y)	H3_DATA(y)	A4_DATA(y)	B4_DATA(y)	C4_DATA(y)
0	0	0	0	0	0	0	0	0	0	0	0	0	0	0	0	0	0	0	0	0	0	0	0	0	0	0	0
3	0.0022	0.0023	0.0003	0.004	0.0007	0.004	0.0012	0	0	0.0016	0.0007	0.0001	0	0.0006	0.0028	0.0034	0	0	0	0	0.0008	0.0015	0	0.0024	0.0028	0	0
6	0.0026	0.0023	0.0003	0.0057	0.0007	0.0066	0.0015	0	0	0.0027	0.0008	0	0	0	0.0041	0.004	0	0	0	0	0.0006	0.0024	0.0003	0.0033	0.0052	0	0
9	0.004	0.0035	0.0009	0.008	0.0009	0.0087	0.0029	0	0	0.0041	0.0013	0	0.0001	0.0004	0.0058	0.006	0	0	0.0012	0.0005	0.0022	0.0049	0.0016	0.005	0.0071	0	0
12	0.0045	0.0034	0.0003	0.0086	0	0.0094	0.0034	0	0	0.005	0.0001	0	0	0	0.0054	0.0055	0	0	0.0019	0	0.003	0.0059	0.0017	0.0049	0.0075	0	0
15	0.0083	0.0057	0.0023	0.0115	0.0017	0.0126	0.0055	0.0004	0.0004	0.0077	0.0022	0.0001	0.0008	0.0014	0.008	0.0077	0	0	0.0047	0.0022	0.006	0.0088	0.0044	0.0074	0.0098	0.0019	0
18	0.0094	0.0061	0.0024	0.012	0.0016	0.0138	0.0059	0.0003	0.0003	0.0112	0.002	0.0001	0.0009	0.0014	0.0087	0.0081	0	0	0.0073	0.0025	0.007	0.0096	0.005	0.0077	0.0105	0.0022	0
21	0.0118	0.0067	0.0026	0.0129	0.0016	0.0145	0.0066	0.0007	0.0008	0.0135	0.0022	0.0003	0.0011	0.002	0.0093	0.009	0	0	0.0091	0.0033	0.0082	0.0107	0.0055	0.0086	0.0107	0.0028	0
24	0.0124	0.0065	0.0017	0.0125	0.0007	0.0139	0.0055	0	0	0.0148	0.0014	0	0	0.0009	0.0088	0.0081	0	0	0.0105	0.0024	0.008	0.0104	0.0046	0.0077	0.0098	0.0023	0
27	0.0148	0.0067	0.0019	0.0129	0.0004	0.0141	0.0058	0	0	0.017	0.0014	0	0	0.001	0.0088	0.0082	0	0	0.0127	0.0027	0.0086	0.0108	0.0048	0.008	0.0097	0.0023	0
30	0.0155	0.0055	0.0001	0.0118	0	0.0125	0.0043	0	0	0.0182	0	0	0	0	0.0077	0.0067	0	0	0.0134	0.0012	0.0076	0.0093	0.0033	0.0061	0.0083	0.0012	0
33	0.0175	0.0063	0.0005	0.0123	0	0.0129	0.0049	0	0	0.0201	0.0006	0	0	0	0.0083	0.0071	0	0	0.0155	0.0018	0.0084	0.0101	0.0039	0.0064	0.009	0.0014	0
36	0.0207	0.0072	0.0012	0.0134	0	0.0141	0.0059	0	0	0.0235	0.0016	0	0	0.0003	0.0091	0.0081	0	0	0.0189	0.0027	0.0095	0.0114	0.0047	0.0075	0.0097	0.0025	0
39	0.0227	0.0069	0.0003	0.0128	0	0.0132	0.0054	0	0	0.0247	0.0013	0	0	0	0.0087	0.0072	0	0	0.0201	0.0021	0.0091	0.011	0.0043	0.0065	0.009	0	0
42	0.0259	0.0056	0	0.0111	0	0.0117	0.0038	0	0	0.0237	0.0001	0	0	0	0.0071	0.0054	0	0	0.0177	0.0013	0.0077	0.0094	0.0025	0.0047	0.0075	0	0
45	0.0301	0.0073	0	0.0124	0	0.0127	0.005	0	0	0.0277	0.0016	0	0	0	0.0081	0.0065	0	0	0.0216	0.0025	0.0089	0.0108	0.0036	0.0059	0.0087	0	0
48	0.0306	0.0068	0	0.0114	0	0.0116	0.0041	0	0	0.0331	0.0009	0	0	0	0.007	0.0055	0	0	0.0281	0.0017	0.0083	0.01	0.0027	0.0048	0.0081	0	0
51	0.0349	0.0074	0	0.0115	0	0.0116	0.0044	0	0	0.0343	0.0017	0	0	0	0.0072	0.0055	0	0	0.0277	0.0024	0.0084	0.0104	0.0027	0.0047	0.0078	0	0
54	0.038	0.0079	0	0.0115	0	0.0117	0.0013	0	0	0.0377	0.0018	0	0	0	0.0075	0.0082	0	0	0.0312	0.0026	0.0088	0.0107	0.003	0.005	0.0036	0	0
57	0.0409	0.0082	0	0.0113	0	0.011	0.004	0	0	0.041	0.0018	0	0	0	0.0069	0.0049	0	0	0.0451	0.0025	0.0081	0.0106	0.0027	0.0041	0.0071	0	0
60	0.0448	0.008	0	0.011	0	0.0107	0.0039	0	0	0.0449	0.0021	0	0	0	0.0067	0.0046	0	0	0.0375	0.0026	0.0079	0.0103	0.0026	0.0034	0.0072	0	0
63	0.0485	0.01	0	0.0122	0	0.012	0.0054	0	0.0027	0.0485	0.0036	0	0	0	0.0081	0.0062	0	0	0.0411	0.0042	0.0094	0.0118	0.0033	0.0049	0.0085	0	0
66	0.0513	0.0094	0	0.0109	0	0.0104	0.0039	0	0	0.0526	0.0026	0	0	0	0.0066	0.0047	0	0	0.0442	0.0034	0.0083	0.0107	0.0025	0.0031	0.0069	0	0
69	0.0548	0.0093	0	0.0105	0	0.0097	0.003	0	0	0.0562	0.0026	0	0	0	0.0061	0.0038	0	0	0.0482	0.0034	0.0078	0.0101	0.0016	0.0021	0.0061	0	0
72	0.0602	0.0106	0	0.011	0	0.0099	0.0035	0	0.0094	0.061	0.0038	0	0	0	0.0065	0.0042	0	0	0.0519	0.0049	0.0082	0.0106	0.002	0.0025	0.0067	0	0
75	0.0636	0.011	0	0.0106	0	0.0096	0.0031	0	0	0.0658	0.0041	0	0	0	0.0062	0.0041	0	0	0.0567	0.0051	0.0083	0.0105	0.0019	0.002	0.0063	0	0
78	0.0695	0.0126	0.0022	0.0114	0	0.0101	0.0038	0	0	0.0708	0.006	0	0	0	0.0069	0.0047	0	0	0.0633	0.0067	0.0139	0.0112	0.0026	0.0025	0.0069	0	0
81	0.0746	0.0138	0.0023	0.0115	0	0.0102	0.0038	0	0	0.0758	0.0069	0	0	0	0.0072	0.0051	0	0	0.0683	0.0081	0.0141	0.0114	0.0029	0.0026	0.0068	0	0
84	0.0781	0.0134	0.0004	0.0101	0	0.0083	0.0022	0	0	0.0788	0.0066	0	0	0	0.0054	0.0032	0	0	0.0719	0.0068	0.0125	0.0097	0.0014	0.0008	0.0054	0	0
87	0.0833	0.0148	0.0014	0.0111	0	0.0093	0.0032	0	0	0.0836	0.0082	0	0	0	0.0066	0.0043	0	0	0.079	0.0119	0.0136	0.0109	0.0025	0.0016	0.006	0	0
90	0.0862	0.0149	0	0.0098	0	0.0081	0.0019	0	0	0.0846	0.0079	0	0	0	0.0052	0.0031	0	0	0.0824	0.009	0.0127	0.0096	0.0012	0.0004	0.0049	0	0
93	0.0901	0.0159	0.0006	0.0103	0	0.0083	0.0026	0	0	0.0909	0.0097	0	0	0	0.006	0.0036	0	0	0.0912	0.0105	0.0129	0.0102	0.0017	0.0006	0.0052	0	0
96	0.0951	0.0169	0	0.0092	0	0.0072	0.0011	0	0	0.0941	0.009	0	0	0	0.0048	0.0023	0	0	0.0966	0.0109	0.0116	0.0088	0.0008	0	0.0041	0	0
99	0.1026	0.0175	0	0.01	0	0.0076	0.0015	0	0	0.1006	0.012	0	0	0	0.0054	0.003	0	0	0.1058	0.0198	0.0126	0.0096	0.0015	0	0.0045	0	0
102	0.1089	0.019	0	0.0099	0	0.0075	0.0013	0	0	0.105	0.0133	0	0	0	0.0052	0.0029	0	0	0.1127	0.0149	0.0124	0.0095	0.0013	0	0.0043	0	0
105	0.1154	0.0198	0	0.0096	0	0.007	0.0008	0	0	0.11	0.0143	0	0	0	0.005	0.0027	0	0	0.1218	0.0164	0.0121	0.0093	0.0012	0	0.0036	0	0
108	0.1223	0.0238	0.0051	0.0098	0	0.007	0.0007	0	0	0.1148	0.0175	0	0	0	0.0049	0.0028	0	0	0.1309	0.0233	0.0181	0.0092	0	0	0.0036	0	0
111	0.1292	0.0237	0.0061	0.0103	0	0.0076	0.0014	0	0	0.1231	0.0226	0	0	0	0.0056	0.0035	0	0	0.1404	0.0231	0.0201	0.01	0	0	0.0045	0	0
114	0.1366	0.0239	0.0049	0.0095	0	0.0069	0.0004	0	0	0.1284	0.0206	0	0	0	0.0046	0.0026	0	0	0.1509	0.0217	0.0181	0.0091	0	0	0.0033	0	0
117	0.142	0.0246	0.0063	0.0082	0	0.0055	0	0	0	0.1339	0.0181	0	0	0	0.0034	0.0015	0	0	0.1587	0.0212	0.0171	0.0076	0	0	0.0018	0	0
120	0.1494	0.0277	0.0031	0.0073	0	0.0047	0.0028	0	0	0.1419	0.0197	0	0	0	0.0025	0	0	0	0.1703	0.0234	0.0168	0.0068	0	0	0.0064	0	0
123	0.1586	0.0357	0.0026	0.0069	0	0.004	0.0015	0	0	0.1481	0.0273	0	0	0	0.0017	0	0	0	0.1787	0.0301	0.0157	0.0061	0	0	0.0055	0	0
126	0.1654	0.0293	0.0032	0.0071	0	0.0045	0.0018	0	0	0.1522	0.0326	0	0	0	0.002	0	0	0	0.1865	0.0278	0.0161	0.0062	0	0	0.0056	0	0
129	0.175	0.0327	0.0028	0.0067	0	0.0041	0.0012	0	0	0.1638	0.0248	0	0	0	0.0015	0	0	0	0.2002	0.0292	0.0157	0.006	0	0	0.0054	0	0
132	0.1855	0.0363	0.0043	0.0079	0	0.0048	0.0015	0	0	0.173	0.0297	0	0	0	0.0021	0	0	0	0.2134	0.031	0.0168	0.0056	0	0	0.005	0	0
135	0.196	0.0399	0.0026	0.006	0	0.0033	0.0001	0	0	0.1791	0.0354	0	0	0	0.0007	0	0	0	0.2234	0.0376	0.0159	0.0052	0	0	0.004	0	0
138	0.2073	0.0415	0.0039	0.0068	0	0.0036	0.0002	0	0	0.1898	0.0419	0	0	0	0.0015	0	0	0	0.2363	0.0449	0.0185	0.0057	0	0	0.004	0	0
141	0.2173	0.046	0.003	0.0064	0	0.0029	0	0	0.0014	0.2006	0.0432	0	0	0	0.0007	0	0	0	0.2498	0.0383	0.0167	0.0049	0	0	0.0032	0	0
144	0.2277	0.0496	0.0045	0.0064	0	0.0029	0	0	0	0.2099	0.0429	0	0	0	0.0008	0	0	0	0.2655	0.0439	0.0188	0.0046	0	0	0.003	0	0
147	0.24	0.0567	0.0044	0.0063	0	0.0028	0	0	0	0.2203	0.0487	0	0	0	0.0004	0	0	0	0.287	0.0483	0.0269	0.0045	0	0	0.0027	0	0
150	0.2554	0.0607	0.0097	0.0067	0	0.0032	0	0	0	0.2355	0.0566	0	0	0	0.0009	0	0	0	0.3069	0.0569	0.0188	0.0048	0	0	0.003	0	0
153	0.2736	0.0661	0.0054	0.0068	0	0.0029	0	0	0	0.2512	0.0658	0	0	0	0.0005	0	0	0	0.3233	0.0638	0.0204	0.0044	0	0	0.0025	0	0
156	0.2847	0.0812	0.0051	0.0062	0	0.0025	0	0	0	0.2612	0.0683	0	0	0	0	0	0	0	0.3294	0.0717	0.0264	0.0036	0	0	0.0017	0	0
159	0.3001	0.0837	0.0058	0.0067	0	0.0025	0	0	0	0.2772	0.0745	0	0	0	0	0	0	0	0.3383	0.0758	0.0202	0.0043	0	0	0.002	0	0
162	0.3135	0.0905	0.0081	0.0083	0	0.0044	0	0	0	0.2928	0.0862	0	0	0	0.0016	0	0	0	0.3483	0.0915	0.0221	0.0052	0	0	0.0027	0	0
165	0.3289	0.1073	0.014	0.0126	0	0.0087	0.0038	0	0	0.3086	0.1025	0.0027	0	0	0.0057	0.0028	0	0	0.3601	0.1054	0.0259	0.0095	0	0.001	0.0069	0	0
168	0.3516	0.1371	0.0228	0.0267	0.0039	0.0225	0.0173	0.0063	0.0077	0.3347	0.13	0.0247	0.0088	0.0138	0.0192	0.0165	0.0005	0	0.3822	0.1336	0.0349	0.0226	0.0097	0.0148	0.0214	0.0078	0
171	0.352	0.1383	0.0159	0.0182	0	0.0138	0.0084	0	0	0.3364	0.1304	0.0152	0	0.0049	0.0107	0.0078	0	0	0.3771	0.134	0.0277	0.0144	0.0008	0.0062	0.0117	0	0
174	0.3615	0.1499	0.0185	0.0194	0	0.0144	0.0091	0	0	0.3536	0.1446	0.0163	0	0.0056	0.0116	0.0087	0	0	0.3838	0.1432	0.0291	0.0153	0.0016	0.0066	0.012	0	0
177	0.3702	0.1654	0.018	0.0203	0	0.0156	0.01	0	0.0003	0.3608	0.1543	0.0153	0.0018	0.0067	0.0121	0.0094	0	0	0.3898	0.1588	0.0312	0.0163	0.0027	0.0081	0.0132	0.0002	0
180	0.3796	0.1804	0.0353	0.0229	0	0.0178	0.0122	0.0011	0.0021	0.369	0.1727	0.0296	0.004	0.0092	0.0145	0.0118	0	0	0.397	0.1727	0.0347	0.0178	0.0046	0.0101	0.0152	0.0021	0
183	0.3865	0.1933	0.0225	0.0227	0	0.0178	0.0122	0.0009	0.0024	0.3783	0.1848	0.0354	0.0033	0.0089	0.0145	0.0117	0	0	0.4019	0.192	0.0344	0.0186	0.0045	0.0102	0.0152	0.0021	0
186	0.393	0.2062	0.0253	0.0232	0.0019	0.0176	0.0118	0.0004	0.0013	0.3851	0.1962	0.0218	0.0038	0.0063	0.0139	0.0112	0	0	0.4062	0.2066	0.0373	0.0186	0.0078	0.0099	0.0148	0.0017	0
189	0.397	0.2155	0.0303	0.0232	0.003	0.0184	0.0125	0.001	0.0022	0.3914	0.2051	0.0391	0.0048	0.0063	0.0144	0.0119	0	0	0.4092	0.2089	0.0408	0.021	0.008	0.0105	0.0155	0.0022	0
192	0.4026	0.2283	0.027	0.0233	0	0.0189	0.0129	0.0013	0.0024	0.4019	0.2177	0.024	0.005	0.0093	0.0146	0.0123	0	0	0.4145	0.2247	0.0405	0.0203	0.0055	0.0109	0.0158	0.0026	0
195	0.4086	0.2422	0.0322	0.0246	0.0027	0.0193	0.0137	0.0018	0.0034	0.406	0.2317	0.0396	0.0048	0.0076	0.0153	0.0128	0	0	0.4198	0.2406	0.0444	0.02	0.0088	0.0118	0.0166	0.0031	0
198	0.4136	0.2566	0.0352	0.0244	0.0027	0.0193	0.0134	0.0017	0.0023	0.416	0.2449	0.0476	0.0101	0.0073	0.0151	0.0124	0	0	0.4236	0.253	0.0495	0.0202	0.0086	0.0116	0.0164	0.0029	0
201	0.4193	0.2707	0.0498	0.0252	0.0032	0.0198	0.0139	0.0019	0.0031	0.418	0.2604	0.0431	0.0073	0.0077	0.0155	0.0129	0	0	0.4285	0.2657	0.0643	0.0261	0.0092	0.012	0.0168	0.0033	0
204	0.4255	0.2847	0.0695	0.0278	0.0038	0.0205	0.0146	0.0028	0.0041	0.4244	0.2763	0.0437	0.0066	0.0083	0.0162	0.0136	0	0	0.4335	0.2802	0.0665	0.0213	0.0105	0.0133	0.0175	0.0038	0
207	0.4299	0.298	0.0591	0.0291	0.0035	0.0207	0.0144	0.0025	0.0035	0.4334	0.2925	0.0817	0.0078	0.0082	0.0159	0.0141	0	0	0.441	0.2908	0.0566	0.0213	0.0097	0.0129	0.0174	0.0038	0
210	0.4349	0.3096	0.058	0.0302	0.0034	0.0207	0.0146	0.0023	0.0036	0.4357	0.3054	0.0552	0.0117	0.0082	0.0159	0.014	0	0	0.4441	0.3026	0.0653	0.0272	0.0099	0.0129	0.0174	0.0034	0
213	0.4398	0.3198	0.0617	0.0275	0.004	0.0208	0.0146	0.0022	0.0037	0.4415	0.3172	0.0677	0.018	0.0083	0.0159	0.014	0	0	0.4506	0.315	0.0707	0.027	0.0108	0.0129	0.0175	0.0034	0
216	0.4437	0.3316	0.0618	0.0432	0.0057	0.0213	0.0151	0.0029	0.0038	0.4468	0.3293	0.0592	0.0141	0.0089	0.0164	0.0145	0	0	0.4522	0.3294	0.0761	0.0284	0.0107	0.0139	0.0181	0.0078	0
219	0.4476	0.3397	0.0712	0.0295	0.0042	0.0219	0.0161	0.003	0.0044	0.4515	0.3421	0.0701	0.0139	0.0094	0.0164	0.0147	0	0	0.4567	0.3424	0.0754	0.029	0.0105	0.0139	0.0184	0.008	0
222	0.4513	0.3554	0.0756	0.0287	0.0038	0.0216	0.0153	0.0028	0.0038	0.4531	0.3584	0.0758	0.0147	0.0091	0.0164	0.0143	0	0	0.4585	0.3573	0.1085	0.03	0.0101	0.014	0.0185	0.0077	0
225	0.4557	0.3719	0.0854	0.0299	0.0045	0.0222	0.0159	0.0034	0.0045	0.4604	0.3709	0.0978	0.0163	0.0126	0.0167	0.0146	0	0	0.4627	0.3683	0.1053	0.0333	0.0108	0.0145	0.019	0.0082	0
228	0.4601	0.3812	0.0902	0.0365	0.0049	0.0224	0.0161	0.0036	0.0049	0.4634	0.3795	0.103	0.0165	0.0099	0.0168	0.015	0	0	0.4669	0.3761	0.0969	0.031	0.0112	0.0148	0.0194	0.0084	0
231	0.4676	0.3874	0.1051	0.0324	0.0048	0.0226	0.0162	0.0034	0.0046	0.468	0.3865	0.1011	0.022	0.0111	0.0164	0.0147	0	0	0.4694	0.3893	0.112	0.0259	0.0116	0.0149	0.019	0.0081	0
234	0.4681	0.3937	0.1105	0.0386	0.0042	0.0221	0.0163	0.0032	0.0043	0.4716	0.3929	0.112	0.0254	0.01	0.0162	0.0142	0	0	0.473	0.3889	0.116	0.0317	0.0117	0.0147	0.0187	0.0077	0
237	0.4713	0.3989	0.1188	0.0328	0.005	0.0227	0.016	0.0032	0.0046	0.4766	0.4027	0.1251	0.0216	0.0106	0.0164	0.0145	0	0	0.4765	0.3944	0.1255	0.0367	0.0111	0.015	0.0192	0.0078	0
240	0.4759	0.4046	0.1301	0.0339	0.0086	0.018	0.0163	0.0052	0.0047	0.4802	0.4048	0.1357	0.0175	0.0087	0.0189	0.0148	0	0	0.4802	0.4005	0.1366	0.0361	0.0186	0.0095	0.0195	0.008	0
243	0.4791	0.4108	0.144	0.0357	0.0087	0.0176	0.0164	0.0051	0.0049	0.4943	0.4106	0.1457	0.0235	0.0096	0.0188	0.0148	0	0	0.4857	0.4065	0.1466	0.0347	0.0152	0.0097	0.0199	0.008	0
246	0.4823	0.4142	0.1564	0.0384	0.008	0.0174	0.0161	0.0045	0.0042	0.4869	0.4148	0.1561	0.0199	0.0089	0.0184	0.0142	0	0	0.4854	0.4104	0.157	0.0392	0.0158	0.009	0.019	0.0078	0
249	0.4852	0.4176	0.1636	0.0408	0.008	0.017	0.0158	0.0041	0.0042	0.4931	0.4191	0.1668	0.0202	0.0081	0.0182	0.014	0	0	0.4917	0.4151	0.1627	0.0408	0.0148	0.0088	0.0193	0.0074	0
252	0.4885	0.4232	0.1772	0.0406	0.0087	0.0179	0.017	0.0051	0.0055	0.4956	0.4271	0.1757	0.0224	0.0098	0.0189	0.0148	0	0	0.4937	0.4204	0.1743	0.0356	0.0164	0.0096	0.0201	0.008	0
255	0.4913	0.4282	0.1886	0.0511	0.0089	0.0179	0.0169	0.0051	0.0052	0.499	0.4336	0.1874	0.0279	0.0094	0.019	0.0148	0	0	0.4972	0.4259	0.1845	0.05	0.0198	0.0099	0.02	0.0082	0
258	0.4934	0.432	0.2	0.0525	0.0082	0.0174	0.0163	0.0042	0.0045	0.5028	0.4338	0.1995	0.0268	0.0099	0.0181	0.0138	0	0	0.5006	0.4301	0.1945	0.042	0.0174	0.0093	0.0197	0.0075	0
261	0.4971	0.4371	0.2133	0.0453	0.0086	0.0177	0.0123	0.0046	0.0047	0.5082	0.4392	0.2094	0.0285	0.0094	0.0187	0.0164	0	0	0.503	0.4365	0.2084	0.0549	0.018	0.0098	0.0145	0.0072	0
264	0.5005	0.4414	0.2266	0.0506	0.0091	0.0179	0.0124	0.0047	0.0048	0.508	0.4434	0.2208	0.0299	0.0106	0.0183	0.0165	0	0	0.5064	0.4397	0.2156	0.0465	0.0155	0.0094	0.0145	0.0075	0
267	0.5037	0.446	0.2415	0.0594	0.0088	0.0175	0.0121	0.0043	0.0045	0.5111	0.4505	0.2336	0.0362	0.0119	0.0183	0.0161	0	0	0.5105	0.4445	0.2275	0.0512	0.0156	0.0091	0.0144	0.0071	0
270	0.5174	0.4505	0.2536	0.0535	0.0089	0.0176	0.0121	0.0043	0.0046	0.5152	0.4526	0.2664	0.0425	0.0103	0.0185	0.0162	0	0	0.5128	0.4492	0.2389	0.0533	0.0149	0.0112	0.0144	0.0079	0
273	0.5105	0.4548	0.2726	0.0577	0.0297	0.0178	0.0125	0.0044	0.0044	0.5173	0.4571	0.259	0.0437	0.0153	0.0186	0.0169	0	0	0.5152	0.4538	0.2514	0.0574	0.0218	0.0098	0.0148	0.0078	0
276	0.514	0.4592	0.2798	0.0612	0.0095	0.0173	0.012	0.0039	0.0047	0.5196	0.4626	0.2699	0.0539	0.0109	0.018	0.0157	0	0	0.5164	0.4583	0.2649	0.0605	0.0167	0.0096	0.0146	0.0075	0
279	0.5165	0.4642	0.2975	0.0661	0.0097	0.0168	0.0119	0.004	0.0042	0.5248	0.4655	0.2811	0.0504	0.0115	0.0178	0.0154	0	0	0.521	0.4623	0.2757	0.0674	0.0176	0.0088	0.0142	0.0068	0
282	0.519	0.4662	0.2991	0.1133	0.0095	0.017	0.0119	0.0036	0.0036	0.5273	0.4688	0.2874	0.0599	0.015	0.0178	0.0154	0	0	0.5241	0.4654	0.2841	0.07	0.0224	0.0096	0.0138	0.007	0.0018
285	0.5231	0.4711	0.3114	0.0767	0.0137	0.0171	0.0119	0.0038	0.004	0.5297	0.4732	0.3026	0.059	0.0209	0.0181	0.0154	0	0	0.5269	0.4743	0.2972	0.0782	0.0171	0.0093	0.0143	0.0072	0.0017
288	0.53	0.4744	0.325	0.0822	0.0111	0.0222	0.012	0.0038	0.0038	0.5331	0.477	0.3197	0.1183	0.0129	0.0164	0.0155	0	0	0.5297	0.4781	0.3119	0.0874	0.0248	0.0147	0.0145	0.007	0.0019
291	0.5293	0.4789	0.3449	0.0882	0.0116	0.0222	0.0121	0.0036	0.0037	0.5364	0.4831	0.3387	0.0862	0.0453	0.0161	0.0152	0	0	0.5331	0.4847	0.3255	0.1029	0.0216	0.015	0.0144	0.0067	0.0015
294	0.5332	0.4834	0.3611	0.0967	0.0126	0.0225	0.0122	0.004	0.0039	0.5381	0.4857	0.351	0.0851	0.0168	0.0165	0.0154	0	0	0.535	0.4861	0.3427	0.1086	0.0232	0.017	0.0143	0.0069	0.0017
297	0.5361	0.4873	0.3717	0.1043	0.0136	0.0224	0.012	0.0034	0.0039	0.5477	0.4892	0.3606	0.0953	0.0147	0.016	0.015	0	0	0.5379	0.4903	0.3608	0.1149	0.0205	0.0155	0.0145	0.0069	0.0011
300	0.539	0.4913	0.3813	0.1166	0.0134	0.0221	0.0121	0.0034	0.0035	0.5473	0.4929	0.3695	0.1101	0.0156	0.0167	0.015	0	0	0.5409	0.4941	0.3751	0.1292	0.0265	0.0149	0.0144	0.0068	0.0011
303	0.5421	0.4947	0.3901	0.1266	0.0143	0.0222	0.012	0.0036	0.0039	0.5479	0.4968	0.3801	0.1165	0.0211	0.0166	0.0151	0	0	0.5446	0.4983	0.386	0.1337	0.0206	0.0148	0.0144	0.0068	0.0011
306	0.5513	0.4985	0.3978	0.1336	0.0161	0.0226	0.0124	0.0039	0.0045	0.5512	0.5005	0.386	0.1373	0.0181	0.0168	0.0151	0	0	0.5488	0.5021	0.3944	0.1525	0.023	0.0152	0.0149	0.0073	0.0013
309	0.5485	0.5022	0.4081	0.1452	0.019	0.0224	0.0122	0.0036	0.0045	0.5554	0.504	0.3953	0.144	0.0197	0.0171	0.0152	0	0	0.5531	0.5057	0.4023	0.1668	0.0343	0.0151	0.0148	0.007	0.0009
312	0.5496	0.5052	0.4089	0.1512	0.0238	0.0228	0.0126	0.0036	0.0037	0.557	0.5057	0.3974	0.1559	0.0279	0.0172	0.0153	0	0	0.555	0.5074	0.407	0.17	0.0259	0.0156	0.0148	0.0073	0.0004
315	0.5544	0.508	0.4154	0.1659	0.0216	0.0228	0.013	0.0043	0.0045	0.5609	0.5092	0.405	0.1643	0.0306	0.0179	0.0156	0	0	0.5591	0.5149	0.4141	0.1789	0.0274	0.0202	0.0156	0.0077	0.0008
318	0.5569	0.5105	0.4207	0.1778	0.0229	0.0227	0.0129	0.0039	0.0039	0.5646	0.5117	0.4104	0.1792	0.0266	0.0176	0.0153	0	0	0.5627	0.5136	0.4194	0.1885	0.0272	0.0151	0.015	0.0073	0.0005
321	0.5614	0.5135	0.4262	0.1893	0.0246	0.0229	0.013	0.0039	0.0043	0.5688	0.5149	0.4174	0.196	0.046	0.0182	0.0155	0	0	0.5722	0.5166	0.426	0.2005	0.0342	0.0153	0.0152	0.0075	0.0004
324	0.564	0.5162	0.4314	0.2013	0.0232	0.0228	0.0128	0.0038	0.0041	0.5719	0.518	0.4209	0.2116	0.0429	0.018	0.0152	0	0	0.5686	0.5199	0.4304	0.2141	0.0371	0.0154	0.0151	0.0074	0.0003
327	0.5672	0.5189	0.4374	0.216	0.0385	0.023	0.0128	0.0037	0.0039	0.5749	0.5209	0.4273	0.2254	0.0367	0.0184	0.0151	0	0	0.5717	0.5231	0.4363	0.2253	0.0506	0.0157	0.0152	0.0072	0.0002
330	0.5714	0.5233	0.442	0.2294	0.0278	0.0233	0.0134	0.0039	0.0043	0.5811	0.5249	0.4332	0.2419	0.0366	0.0191	0.0153	0	0	0.5755	0.5271	0.4417	0.2393	0.0444	0.0156	0.0153	0.0077	0.0002
333	0.5731	0.5261	0.4472	0.2447	0.0342	0.0233	0.013	0.0036	0.0041	0.5822	0.5279	0.438	0.2548	0.0354	0.0194	0.015	0	0	0.5775	0.5303	0.4466	0.2542	0.0434	0.0155	0.0154	0.0075	0
336	0.5769	0.5294	0.4522	0.2595	0.0318	0.0238	0.0133	0.0039	0.0042	0.589	0.5309	0.4437	0.2698	0.0475	0.02	0.0153	0	0	0.5811	0.5335	0.4516	0.2661	0.0499	0.0169	0.0153	0.0034	0.0001
339	0.5798	0.5331	0.4576	0.2714	0.0411	0.0251	0.0136	0.0039	0.0038	0.5889	0.5351	0.4497	0.2839	0.0517	0.0205	0.0151	0	0	0.5846	0.5378	0.4575	0.2799	0.0515	0.0159	0.0155	0.0036	0
342	0.584	0.5381	0.4627	0.2853	0.0489	0.0239	0.0138	0.0041	0.0039	0.5892	0.5401	0.4555	0.2956	0.0548	0.021	0.0155	0	0	0.5845	0.5418	0.4635	0.297	0.0603	0.0163	0.0157	0.0037	0
345	0.5859	0.5399	0.4661	0.2921	0.0787	0.0256	0.0137	0.0039	0.0047	0.5954	0.5418	0.4586	0.3071	0.0624	0.0218	0.0156	0	0	0.5867	0.5444	0.4675	0.302	0.0555	0.0168	0.0165	0.0037	0.0003
348	0.5883	0.5421	0.4699	0.3079	0.0717	0.0239	0.0142	0.0041	0.0043	0.597	0.5433	0.4631	0.3181	0.0615	0.022	0.0154	0	0	0.5949	0.5456	0.4699	0.3148	0.0738	0.0194	0.0159	0.0037	0
351	0.5914	0.5467	0.4754	0.3186	0.0544	0.0292	0.0141	0.0042	0.0044	0.5975	0.5512	0.4689	0.3353	0.0759	0.023	0.0158	0	0	0.5922	0.5513	0.4775	0.3263	0.0802	0.0181	0.0164	0.0039	0
354	0.5944	0.5489	0.4791	0.3299	0.056	0.026	0.014	0.0041	0.0044	0.6033	0.5505	0.4733	0.3524	0.0723	0.0235	0.0157	0	0	0.5984	0.5526	0.4791	0.3409	0.0856	0.0253	0.0166	0.0038	0
357	0.5979	0.5538	0.4848	0.3454	0.0717	0.0257	0.0151	0.0045	0.0047	0.6052	0.5554	0.4792	0.3708	0.0876	0.0244	0.0161	0	0	0.599	0.5581	0.4842	0.3632	0.0985	0.0189	0.017	0.004	0
360	0.5996	0.5576	0.4886	0.3621	0.0783	0.0255	0.0144	0.004	0.0039	0.6063	0.5611	0.4834	0.3838	0.0872	0.0248	0.0156	0	0	0.6007	0.5653	0.4882	0.3789	0.0905	0.0224	0.0165	0.0037	0
363	0.6026	0.5604	0.4927	0.3754	0.0771	0.0261	0.0157	0.0036	0.0036	0.6088	0.5618	0.488	0.3903	0.0954	0.0249	0.0154	0	0	0.6034	0.5652	0.4926	0.3876	0.1014	0.0205	0.0169	0.0032	0
366	0.6059	0.5645	0.4969	0.3843	0.0823	0.0267	0.0147	0.0037	0.0042	0.6173	0.5695	0.4931	0.3984	0.1071	0.0263	0.0154	0	0	0.6071	0.5693	0.497	0.3979	0.1232	0.0199	0.0165	0.0037	0
369	0.6096	0.5692	0.502	0.3939	0.0928	0.0271	0.015	0.0042	0.0045	0.6159	0.5716	0.4973	0.4059	0.1186	0.0274	0.0159	0	0	0.6095	0.5727	0.5008	0.4054	0.1391	0.029	0.0168	0.0036	0
372	0.6115	0.5717	0.5042	0.4006	0.0979	0.0283	0.0149	0.004	0.0043	0.6193	0.5735	0.5011	0.413	0.1354	0.0287	0.0162	0	0	0.6128	0.5766	0.5051	0.4125	0.1488	0.0252	0.0184	0.0034	0
375	0.6131	0.5742	0.508	0.4049	0.1158	0.029	0.0209	0.0042	0.0044	0.6204	0.5757	0.5041	0.4175	0.1437	0.0333	0.0162	0	0	0.6145	0.5788	0.5073	0.4174	0.1677	0.0248	0.0174	0.0038	0.0003
378	0.6166	0.5781	0.5106	0.4117	0.1338	0.0297	0.0161	0.0029	0.0046	0.6227	0.5791	0.5077	0.4232	0.1632	0.0312	0.0164	0	0	0.6168	0.5817	0.5124	0.4233	0.17	0.0314	0.0189	0.0037	0
381	0.6185	0.5818	0.5144	0.4175	0.1364	0.0306	0.0177	0.0032	0.0049	0.6272	0.5831	0.5116	0.4283	0.1817	0.0318	0.017	0	0	0.6204	0.5865	0.515	0.4288	0.1946	0.0255	0.0188	0.0039	0.0001
384	0.6215	0.5849	0.5232	0.4246	0.1433	0.0391	0.0167	0.0031	0.0048	0.6306	0.5874	0.5157	0.434	0.184	0.0348	0.0172	0	0	0.6228	0.5892	0.5229	0.4339	0.1981	0.0311	0.0178	0.0039	0
387	0.6245	0.5876	0.5254	0.428	0.161	0.0357	0.0166	0.003	0.0046	0.6321	0.5887	0.5185	0.4397	0.1944	0.0346	0.0304	0	0	0.6243	0.5918	0.5261	0.44	0.2151	0.0298	0.0181	0.004	0.0004
390	0.6277	0.591	0.5296	0.4332	0.178	0.0342	0.0172	0.0029	0.0043	0.6373	0.5917	0.5219	0.4445	0.2107	0.0374	0.0178	0	0	0.6278	0.595	0.5292	0.4454	0.224	0.0389	0.02	0.0042	0.0006
393	0.6305	0.5943	0.5321	0.4431	0.1898	0.0414	0.018	0.0031	0.0045	0.6386	0.5949	0.5252	0.4508	0.2253	0.0413	0.0181	0	0	0.6298	0.5986	0.5337	0.4509	0.2431	0.034	0.0186	0.0041	0.0008
396	0.633	0.5968	0.5343	0.4436	0.2	0.0374	0.0178	0.0032	0.0042	0.6413	0.5978	0.5283	0.4548	0.2513	0.0441	0.0185	0	0	0.6312	0.6014	0.5349	0.4562	0.2539	0.0392	0.0186	0.0041	0.0007
399	0.6358	0.601	0.5383	0.4485	0.2235	0.0409	0.0189	0.0034	0.0047	0.6464	0.6014	0.5339	0.4604	0.244	0.0415	0.0192	0	0	0.6346	0.6055	0.5382	0.4614	0.2656	0.0408	0.0192	0.004	0.0009
402	0.6392	0.6037	0.5415	0.4531	0.236	0.0408	0.0189	0.0031	0.0043	0.6469	0.6046	0.5384	0.466	0.2553	0.0488	0.02	0	0	0.6369	0.6083	0.5415	0.4667	0.2767	0.0424	0.0196	0.0041	0.0009
405	0.6394	0.6058	0.5446	0.4565	0.2471	0.0414	0.0194	0.0031	0.0042	0.6488	0.6069	0.5379	0.4694	0.2629	0.0461	0.0201	0	0	0.6383	0.6109	0.5433	0.4729	0.2821	0.044	0.0199	0.0041	0.0005
408	0.6427	0.6098	0.5478	0.4616	0.2554	0.0486	0.0251	0.0037	0.0049	0.6526	0.6106	0.542	0.474	0.2749	0.0628	0.021	0	0	0.6414	0.6144	0.5474	0.4754	0.2987	0.0536	0.0205	0.0046	0.0015
411	0.6478	0.6117	0.5517	0.4669	0.2708	0.0472	0.0221	0.003	0.0041	0.6543	0.6128	0.5452	0.4781	0.291	0.0714	0.0209	0	0	0.6427	0.6168	0.5502	0.4794	0.3095	0.0468	0.0225	0.0042	0.0004
414	0.6469	0.6145	0.5587	0.4707	0.287	0.0511	0.0214	0.003	0.004	0.6572	0.6155	0.5486	0.4829	0.3012	0.0575	0.0214	0	0	0.6448	0.6195	0.5579	0.4837	0.3241	0.0528	0.0203	0.004	0.0002
417	0.6526	0.6178	0.5627	0.4752	0.2945	0.0614	0.022	0.0028	0.0041	0.6604	0.6181	0.5522	0.4875	0.3215	0.0661	0.0223	0	0	0.6558	0.6226	0.5611	0.4889	0.3391	0.0611	0.022	0.004	0.0009
420	0.652	0.62	0.5679	0.4804	0.3073	0.0546	0.0232	0.0032	0.0043	0.6616	0.6204	0.5563	0.4926	0.3362	0.0719	0.0229	0	0	0.6506	0.6249	0.5677	0.4988	0.3585	0.0702	0.0215	0.004	0.0011
423	0.6541	0.6232	0.5706	0.4844	0.3221	0.06	0.0234	0.003	0.0041	0.6641	0.6228	0.5594	0.4974	0.3578	0.0686	0.0239	0	0	0.6534	0.6278	0.5677	0.5004	0.373	0.0696	0.0227	0.0042	0.0006
426	0.6582	0.6268	0.5735	0.496	0.3369	0.0655	0.0295	0.0032	0.0044	0.6652	0.6269	0.5665	0.5019	0.3721	0.076	0.0231	0	0	0.6548	0.6313	0.5715	0.5054	0.3832	0.0778	0.0294	0.0049	0.0013
429	0.6607	0.6289	0.5775	0.4941	0.3532	0.0698	0.0317	0.0032	0.0043	0.6687	0.6292	0.5674	0.5064	0.3819	0.0809	0.0244	0	0	0.6578	0.6337	0.5779	0.5069	0.3931	0.0893	0.0288	0.0046	0.0008
432	0.6632	0.6338	0.5817	0.4975	0.371	0.0746	0.0333	0.003	0.0043	0.6711	0.633	0.5711	0.5101	0.3911	0.093	0.025	0	0	0.6596	0.6361	0.5805	0.5122	0.4005	0.0954	0.0323	0.0045	0
435	0.6675	0.6364	0.5856	0.5017	0.3832	0.0831	0.0343	0.0033	0.0043	0.677	0.6349	0.5751	0.5143	0.3991	0.0998	0.0553	0	0	0.67	0.6396	0.5824	0.5149	0.4076	0.1064	0.0379	0.0045	0
438	0.6688	0.6379	0.5895	0.505	0.391	0.0871	0.0365	0.0026	0.0044	0.678	0.6369	0.5776	0.5176	0.4041	0.1154	0.0288	0	0	0.6647	0.6418	0.5851	0.5179	0.4132	0.1189	0.0324	0.0049	0
441	0.6706	0.6405	0.592	0.5129	0.3991	0.0937	0.0356	0.0034	0.0041	0.6796	0.6396	0.5812	0.521	0.4098	0.1194	0.0578	0	0	0.6672	0.6446	0.5893	0.5213	0.4167	0.1339	0.0343	0.0048	0
444	0.673	0.6432	0.5977	0.515	0.406	0.1021	0.0418	0.0024	0.0043	0.6843	0.6418	0.584	0.525	0.4167	0.1281	0.0325	0	0	0.6742	0.6469	0.5921	0.5253	0.423	0.1582	0.0351	0.0047	0
447	0.675	0.6458	0.5983	0.5162	0.4128	0.1149	0.0493	0.0026	0.0042	0.6843	0.6447	0.588	0.5282	0.4207	0.1403	0.0378	0	0	0.6725	0.6463	0.5959	0.5287	0.4276	0.1613	0.0453	0.0049	0
450	0.6777	0.6502	0.6023	0.52	0.4194	0.1328	0.0439	0.003	0.0047	0.687	0.6472	0.5917	0.5316	0.4267	0.152	0.0362	0	0	0.6772	0.6496	0.5995	0.5322	0.4341	0.1771	0.0366	0.0055	0
453	0.6802	0.6523	0.6061	0.5233	0.4243	0.1419	0.0521	0.0026	0.0047	0.6905	0.6505	0.5955	0.5349	0.4305	0.1792	0.0374	0	0	0.6837	0.6522	0.6023	0.5373	0.438	0.1878	0.0418	0.0051	0
456	0.6825	0.6539	0.6092	0.5304	0.4315	0.1485	0.0478	0.0027	0.0043	0.693	0.6526	0.5984	0.538	0.4367	0.1878	0.0407	0	0	0.691	0.6551	0.6063	0.5379	0.4441	0.2025	0.0501	0.0053	0
459	0.684	0.6566	0.6132	0.5291	0.4357	0.1631	0.0533	0.0032	0.0045	0.6942	0.6546	0.6016	0.5413	0.4415	0.2007	0.05	0	0	0.6939	0.6565	0.6103	0.5411	0.4497	0.2182	0.0424	0.0054	0
462	0.6871	0.66	0.6165	0.533	0.4421	0.1765	0.0533	0.003	0.0046	0.6983	0.659	0.6052	0.5443	0.4466	0.2172	0.0434	0	0	0.6985	0.6598	0.6134	0.5437	0.4547	0.2275	0.0553	0.0056	0
465	0.6903	0.6626	0.6201	0.5355	0.447	0.1953	0.0584	0.003	0.0043	0.7016	0.6602	0.6084	0.5486	0.4515	0.2318	0.0621	0	0	0.7018	0.6631	0.6164	0.5491	0.4592	0.238	0.0485	0.005	0
468	0.6967	0.6643	0.6224	0.5374	0.4503	0.2016	0.0747	0.0028	0.004	0.7029	0.6624	0.6106	0.5507	0.4547	0.2403	0.0489	0	0	0.7033	0.6656	0.619	0.5499	0.463	0.248	0.0598	0.0051	0
471	0.6956	0.668	0.6267	0.5441	0.4563	0.2143	0.0639	0.0035	0.0046	0.704	0.6665	0.6145	0.5547	0.46	0.2551	0.052	0	0	0.7057	0.6692	0.6227	0.5534	0.4678	0.264	0.0607	0.0055	0
474	0.7054	0.6714	0.6295	0.5446	0.4605	0.2314	0.0699	0.003	0.0042	0.7106	0.6682	0.617	0.5579	0.4641	0.2698	0.0582	0	0	0.7083	0.6719	0.6253	0.557	0.4725	0.2786	0.0588	0.0052	0
477	0.7066	0.6744	0.6333	0.5486	0.466	0.2451	0.0805	0.004	0.0046	0.7169	0.6714	0.6207	0.562	0.4702	0.2825	0.0618	0	0	0.7117	0.6743	0.6296	0.5604	0.4783	0.2888	0.0633	0.0053	0
480	0.7156	0.6774	0.6361	0.5522	0.4717	0.2538	0.0859	0.0042	0.0047	0.7245	0.6741	0.6235	0.5659	0.4746	0.2966	0.0697	0	0	0.7139	0.6769	0.6319	0.565	0.483	0.2982	0.0647	0.0056	0
483	0.7155	0.6796	0.6402	0.5559	0.4763	0.273	0.0966	0.0039	0.0042	0.7298	0.6766	0.6268	0.5691	0.4791	0.3058	0.0735	0	0	0.7175	0.6795	0.6394	0.5712	0.4877	0.3099	0.0789	0.0052	0
486	0.7197	0.682	0.6429	0.5596	0.4811	0.2826	0.1209	0.0036	0.0042	0.7292	0.6786	0.6294	0.5731	0.4829	0.3189	0.0801	0	0	0.7173	0.682	0.6382	0.5721	0.4923	0.3215	0.0869	0.0051	0
489	0.7208	0.6844	0.6462	0.5635	0.4862	0.2964	0.1204	0.0041	0.0046	0.7368	0.6808	0.6328	0.5775	0.488	0.3314	0.0885	0	0	0.727	0.6843	0.641	0.5767	0.4966	0.3393	0.0931	0.0054	0
492	0.7268	0.6872	0.6439	0.5671	0.4904	0.3105	0.1273	0.0033	0.0037	0.7341	0.683	0.6344	0.5805	0.4917	0.3431	0.0957	0	0	0.7209	0.6865	0.6389	0.58	0.5008	0.3553	0.0989	0.0046	0
495	0.7262	0.6895	0.6474	0.5716	0.4953	0.3186	0.1406	0.0039	0.0043	0.7349	0.6853	0.6373	0.585	0.4967	0.3619	0.1027	0	0	0.7218	0.689	0.642	0.5841	0.5056	0.3764	0.1103	0.0051	0
498	0.7292	0.6927	0.6505	0.5742	0.4985	0.3277	0.1524	0.0037	0.0041	0.7407	0.688	0.6407	0.5877	0.4992	0.375	0.1087	0	0	0.7261	0.6921	0.6461	0.5885	0.5082	0.3819	0.1128	0.0048	0
501	0.7301	0.694	0.6532	0.5783	0.5037	0.3416	0.1634	0.0042	0.0048	0.7412	0.6894	0.643	0.5923	0.5041	0.3903	0.1274	0	0	0.7265	0.6941	0.6475	0.5912	0.5135	0.3933	0.118	0.0054	0
504	0.732	0.696	0.6557	0.582	0.5074	0.3577	0.1814	0.0038	0.0044	0.7405	0.6913	0.6455	0.5958	0.5072	0.3982	0.1329	0	0	0.7267	0.6963	0.6501	0.5942	0.5168	0.3993	0.1349	0.0049	0
507	0.7337	0.6979	0.6589	0.5859	0.5119	0.3756	0.1874	0.0039	0.0045	0.7444	0.6936	0.6483	0.5991	0.5115	0.4055	0.1609	0	0	0.7292	0.6998	0.653	0.5972	0.5206	0.4078	0.1541	0.0048	0
510	0.7414	0.6999	0.6616	0.5894	0.5164	0.3919	0.2032	0.0037	0.0043	0.7462	0.6974	0.6515	0.6026	0.5154	0.4138	0.1623	0	0	0.7305	0.7054	0.656	0.6004	0.5243	0.4141	0.1648	0.0048	0
513	0.7387	0.7021	0.6647	0.5928	0.5209	0.4024	0.2239	0.0037	0.0046	0.7494	0.702	0.6545	0.6068	0.519	0.4195	0.1699	0	0	0.7332	0.7127	0.659	0.6048	0.5279	0.4201	0.1822	0.0049	0
516	0.74	0.7052	0.6679	0.5959	0.5248	0.4098	0.2288	0.0038	0.0046	0.75	0.7097	0.6569	0.61	0.5224	0.4264	0.18	0	0	0.7346	0.7189	0.6614	0.6082	0.5307	0.4253	0.194	0.0047	0
519	0.7418	0.7092	0.6709	0.5999	0.528	0.4174	0.2443	0.0037	0.0041	0.752	0.7153	0.6596	0.6138	0.5251	0.4313	0.1929	0	0	0.7362	0.7222	0.6646	0.6115	0.5335	0.4303	0.2142	0.0045	0
522	0.7446	0.7158	0.6743	0.6036	0.532	0.424	0.2584	0.0043	0.005	0.7539	0.7185	0.6629	0.6182	0.5292	0.438	0.2046	0	0	0.7377	0.7255	0.6673	0.6156	0.5376	0.4376	0.2246	0.0048	0
525	0.7462	0.7212	0.6767	0.6065	0.5351	0.4291	0.2692	0.0037	0.0041	0.7553	0.7206	0.6645	0.6212	0.532	0.4429	0.218	0	0	0.7381	0.7275	0.6698	0.6183	0.5408	0.4431	0.2348	0.0042	0
528	0.748	0.7253	0.6791	0.6106	0.5351	0.428	0.2832	0.0049	0.0054	0.7594	0.7225	0.6672	0.6262	0.5347	0.4492	0.2275	0	0	0.7425	0.7296	0.676	0.6232	0.5413	0.4418	0.251	0.0009	0
531	0.7482	0.7261	0.6805	0.6133	0.5405	0.4397	0.2943	0.0036	0.0045	0.7602	0.7236	0.6687	0.628	0.5377	0.4527	0.2387	0	0	0.7433	0.7306	0.6735	0.6248	0.5478	0.452	0.261	0.0042	0
534	0.7499	0.7299	0.6842	0.6168	0.544	0.4458	0.3081	0.0037	0.0044	0.7594	0.7266	0.6722	0.6323	0.5413	0.4579	0.2507	0	0	0.7442	0.7329	0.6759	0.6281	0.5517	0.4572	0.2702	0.0044	0
537	0.7524	0.7339	0.6842	0.6193	0.548	0.4519	0.3207	0.0046	0.0052	0.7581	0.7313	0.6745	0.6344	0.545	0.463	0.2644	0	0	0.7443	0.7376	0.6758	0.6307	0.5556	0.4633	0.2848	0.0043	0
540	0.7532	0.734	0.6856	0.6228	0.5508	0.4573	0.3315	0.0037	0.0046	0.7609	0.7307	0.6766	0.6383	0.5481	0.4687	0.2768	0	0	0.7453	0.7369	0.6768	0.6337	0.5588	0.4683	0.2968	0.0076	0
543	0.7523	0.7383	0.69	0.6319	0.555	0.4625	0.3468	0.0061	0.0054	0.7651	0.7348	0.6811	0.6418	0.5524	0.4738	0.2929	0.0005	0	0.7483	0.7414	0.6816	0.6377	0.5633	0.4744	0.3104	0.0082	0
546	0.7532	0.7393	0.6915	0.6302	0.558	0.4673	0.3666	0.0037	0.0044	0.765	0.7362	0.6831	0.6447	0.5565	0.4784	0.3039	0	0	0.7489	0.7422	0.6834	0.6405	0.5671	0.4787	0.3217	0.0075	0
549	0.7574	0.7425	0.6959	0.639	0.5622	0.4726	0.3869	0.0053	0.0047	0.7666	0.7401	0.6867	0.6502	0.5592	0.484	0.3161	0	0	0.7535	0.7455	0.6879	0.6451	0.5719	0.4843	0.3405	0.0075	0
552	0.7593	0.7448	0.6978	0.637	0.5658	0.4733	0.3953	0.0053	0.005	0.7688	0.7418	0.6883	0.6529	0.5634	0.4887	0.3281	0	0	0.7546	0.7472	0.6906	0.6489	0.5763	0.4843	0.3557	0.0075	0
555	0.7593	0.749	0.7006	0.6402	0.5693	0.4784	0.4048	0.0055	0.0047	0.7695	0.7447	0.6916	0.6568	0.5673	0.4938	0.342	0	0	0.7551	0.7492	0.6935	0.6512	0.5798	0.4891	0.3734	0.0076	0
558	0.7581	0.7464	0.7028	0.6438	0.5728	0.4832	0.4129	0.0055	0.0049	0.7698	0.743	0.692	0.6591	0.5718	0.4987	0.3581	0	0	0.7537	0.7494	0.6943	0.6538	0.5827	0.4938	0.3859	0.0075	0
561	0.7583	0.7479	0.7038	0.6456	0.5757	0.4863	0.4183	0.0051	0.0046	0.7707	0.7444	0.6956	0.6612	0.5745	0.5024	0.3715	0	0	0.7551	0.7505	0.6964	0.6552	0.5854	0.4971	0.3908	0.0074	0
564	0.7626	0.7511	0.707	0.6482	0.5789	0.4909	0.423	0.0047	0.0044	0.7699	0.7482	0.6974	0.6644	0.5785	0.5057	0.3895	0	0	0.7576	0.7528	0.6988	0.659	0.5888	0.5014	0.3996	0.0069	0
567	0.7648	0.7537	0.7103	0.6507	0.582	0.4959	0.4312	0.0049	0.0047	0.7739	0.7499	0.7001	0.6677	0.5812	0.511	0.3986	0	0	0.7599	0.7559	0.7026	0.6616	0.5922	0.5054	0.4078	0.007	0
570	0.7661	0.7593	0.7132	0.6561	0.5882	0.5021	0.4386	0.006	0.0056	0.7785	0.7524	0.7024	0.6724	0.5868	0.5163	0.4154	0.0002	0	0.7607	0.7573	0.7057	0.6664	0.5976	0.5122	0.4168	0.0082	0
573	0.7635	0.7544	0.7145	0.6578	0.5951	0.5059	0.4448	0.0049	0.0045	0.7758	0.7512	0.704	0.6744	0.5899	0.5197	0.4141	0	0	0.759	0.7575	0.7065	0.668	0.603	0.5154	0.4215	0.0071	0
576	0.7655	0.7564	0.7177	0.66	0.5984	0.5098	0.4439	0.0048	0.0044	0.7786	0.7537	0.7062	0.6764	0.5919	0.5236	0.4209	0	0	0.7626	0.76	0.7121	0.6696	0.6059	0.5197	0.4226	0.0067	0
579	0.7678	0.7591	0.7218	0.6633	0.5992	0.514	0.4506	0.0048	0.0054	0.7817	0.7562	0.7104	0.6808	0.5946	0.5276	0.4261	0	0	0.7715	0.762	0.7128	0.6735	0.6056	0.5229	0.4299	0.0088	0
582	0.771	0.7616	0.7261	0.6674	0.6064	0.5198	0.4619	0.0057	0.0052	0.7823	0.7587	0.7172	0.6844	0.6004	0.5331	0.433	0	0	0.7684	0.7644	0.7171	0.6799	0.6141	0.528	0.4405	0.008	0
585	0.7695	0.7615	0.7294	0.6695	0.6096	0.524	0.4624	0.0049	0.0049	0.7824	0.7592	0.7235	0.6873	0.6024	0.5356	0.446	0	0	0.7665	0.7649	0.7207	0.6796	0.6164	0.5304	0.4396	0.0073	0
588	0.7702	0.7639	0.7376	0.6729	0.6137	0.5284	0.4725	0.0052	0.0049	0.7875	0.7611	0.7292	0.6908	0.6059	0.5398	0.444	0	0	0.7689	0.7675	0.7272	0.6842	0.6202	0.534	0.4512	0.0078	0
591	0.7762	0.7665	0.7453	0.6762	0.6176	0.533	0.4782	0.005	0.0058	0.7843	0.7644	0.7331	0.6944	0.6105	0.5429	0.4496	0	0	0.7725	0.7699	0.7359	0.6881	0.6242	0.5382	0.4573	0.004	0
594	0.7734	0.7663	0.7477	0.679	0.6206	0.5361	0.4826	0.0059	0.0064	0.7866	0.7649	0.7347	0.6971	0.6126	0.5457	0.4542	0.0002	0	0.7714	0.771	0.7395	0.6891	0.6269	0.5413	0.4615	0.0086	0
597	0.7784	0.7709	0.7514	0.6817	0.6234	0.5394	0.4867	0.0056	0.0057	0.7883	0.7676	0.7386	0.7002	0.6172	0.5482	0.4598	0	0	0.7753	0.7787	0.7434	0.6942	0.6304	0.5434	0.4669	0.0082	0
600	0.7759	0.7685	0.7545	0.6854	0.6272	0.542	0.492	0.0054	0.0053	0.7889	0.7708	0.7405	0.704	0.6187	0.5519	0.4656	0	0	0.774	0.774	0.7453	0.6957	0.6335	0.5467	0.4718	0.0081	0
603	0.7903	0.7833	0.7673	0.6991	0.6409	0.5561	0.5064	0.0154	0.0152	0.801	0.7808	0.7537	0.7175	0.6327	0.5651	0.4811	0.0095	0.0058	0.7866	0.7896	0.7588	0.71	0.6473	0.5608	0.4865	0.0183	0.0072
606	0.7824	0.775	0.7616	0.6941	0.6358	0.5497	0.4991	0.0055	0.0056	0.7915	0.7734	0.748	0.7137	0.6272	0.56	0.4771	0	0	0.7758	0.7782	0.7527	0.7044	0.642	0.5553	0.4778	0.0083	0.0028
609	0.7813	0.7749	0.7644	0.6959	0.6382	0.5529	0.5049	0.0057	0.0057	0.7948	0.7747	0.7501	0.7137	0.63	0.5637	0.4824	0	0	0.7776	0.7811	0.756	0.7061	0.6457	0.5587	0.4836	0.0084	0.0031
612	0.7818	0.7772	0.7667	0.6991	0.6428	0.5565	0.5092	0.0054	0.0056	0.7967	0.7769	0.7526	0.7179	0.6341	0.5677	0.4872	0	0	0.7782	0.7856	0.7585	0.7101	0.6483	0.563	0.4883	0.008	0.0023
615	0.7823	0.778	0.7704	0.7018	0.6462	0.5601	0.5136	0.0054	0.0055	0.798	0.7777	0.7561	0.7208	0.6369	0.5711	0.4928	0	0	0.7833	0.7861	0.7622	0.7125	0.6521	0.567	0.4936	0.0081	0.0026
618	0.7841	0.7808	0.7727	0.7056	0.6498	0.5643	0.5189	0.0052	0.0052	0.7975	0.7804	0.7583	0.7245	0.6411	0.5758	0.4983	0	0	0.78	0.7894	0.7644	0.717	0.6562	0.5723	0.5	0.0077	0.0025
621	0.7861	0.7821	0.7759	0.7093	0.6546	0.5686	0.5248	0.0054	0.0053	0.7991	0.7827	0.7616	0.7281	0.6443	0.5793	0.5039	0	0	0.7809	0.7918	0.7676	0.7214	0.6593	0.5768	0.5038	0.0082	0.0026
624	0.788	0.7828	0.7775	0.7115	0.6569	0.5708	0.5272	0.0055	0.0054	0.8001	0.7834	0.7628	0.7306	0.6466	0.5829	0.5072	0	0	0.7809	0.7919	0.7686	0.7219	0.6611	0.5795	0.5071	0.008	0.0026
627	0.7876	0.785	0.7797	0.7138	0.6606	0.5752	0.5317	0.0056	0.0056	0.8014	0.7854	0.7653	0.7331	0.6499	0.5876	0.5123	0	0	0.7823	0.7943	0.7717	0.7257	0.666	0.5841	0.5118	0.0081	0.0019
630	0.7895	0.7864	0.7826	0.7175	0.6642	0.5838	0.5365	0.0057	0.0056	0.8037	0.7871	0.7681	0.7363	0.6533	0.5933	0.5171	0	0	0.785	0.7958	0.774	0.7292	0.6683	0.5923	0.5168	0.0083	0.0022
633	0.7921	0.7875	0.7848	0.7192	0.6672	0.5864	0.541	0.0053	0.0054	0.8046	0.7879	0.77	0.7396	0.6562	0.5965	0.5213	0	0	0.7848	0.7971	0.7762	0.7341	0.6709	0.5956	0.5204	0.0081	0.0018
636	0.7911	0.7901	0.7866	0.7219	0.67	0.591	0.5449	0.0054	0.0055	0.8051	0.7898	0.7718	0.7411	0.6593	0.5998	0.5264	0	0	0.7872	0.7988	0.7788	0.7398	0.6751	0.6001	0.5256	0.0082	0.0015
639	0.7915	0.7912	0.7887	0.7252	0.6742	0.5971	0.5488	0.0053	0.0051	0.8062	0.7914	0.7738	0.7438	0.6623	0.6037	0.5307	0	0	0.7886	0.7996	0.7807	0.7488	0.6791	0.6044	0.5299	0.0082	0.0015
642	0.7934	0.7931	0.7916	0.7283	0.6775	0.5994	0.5517	0.0052	0.005	0.8074	0.7937	0.7763	0.747	0.6654	0.6073	0.5352	0	0	0.7899	0.8017	0.783	0.7539	0.6825	0.6076	0.5332	0.0082	0.0013
645	0.793	0.7938	0.7927	0.7312	0.6811	0.6057	0.5549	0.0053	0.0054	0.8076	0.7933	0.778	0.7497	0.6693	0.6117	0.5396	0	0	0.7901	0.8049	0.7846	0.7578	0.6863	0.612	0.5368	0.0082	0.0019
648	0.7965	0.7957	0.7951	0.7351	0.6844	0.6079	0.5584	0.0052	0.0051	0.8117	0.7959	0.7804	0.753	0.6722	0.6157	0.5438	0	0	0.7929	0.8042	0.7869	0.7614	0.6888	0.6162	0.5398	0.008	0.0012
651	0.7968	0.7967	0.7965	0.7405	0.6878	0.612	0.5616	0.0051	0.0048	0.8128	0.7972	0.7815	0.7554	0.6752	0.6185	0.5478	0	0	0.7962	0.8058	0.7882	0.7644	0.6924	0.6194	0.543	0.008	0.0009
654	0.797	0.7989	0.799	0.746	0.6914	0.6148	0.5615	0.0054	0.0059	0.8157	0.7986	0.7845	0.7585	0.6777	0.6209	0.5507	0	0	0.7946	0.8072	0.7907	0.7677	0.696	0.6219	0.5442	0.005	0.0015
657	0.7978	0.7986	0.8001	0.7527	0.6938	0.619	0.5689	0.0055	0.0053	0.8166	0.7992	0.7852	0.7618	0.681	0.6258	0.5537	0	0	0.7946	0.8078	0.7918	0.7713	0.7005	0.6262	0.5497	0.0086	0.0013
660	0.7993	0.8013	0.8019	0.756	0.6965	0.6221	0.5727	0.0053	0.0052	0.8178	0.8012	0.7871	0.7669	0.6834	0.6291	0.5562	0	0	0.7964	0.8094	0.7933	0.7732	0.703	0.6298	0.5532	0.0081	0.0011
663	0.8006	0.803	0.8045	0.7594	0.7007	0.6266	0.5773	0.0059	0.0057	0.8209	0.8026	0.7897	0.7755	0.6876	0.6343	0.5604	0	0	0.7989	0.811	0.7959	0.7772	0.7066	0.6348	0.5579	0.0091	0.0015
666	0.8048	0.8034	0.8047	0.7627	0.7047	0.6299	0.5819	0.0059	0.0058	0.8245	0.8038	0.7915	0.7819	0.6913	0.6372	0.564	0	0	0.8003	0.8125	0.7968	0.78	0.7088	0.6372	0.5614	0.0091	0.0015
669	0.8037	0.8057	0.8075	0.7642	0.7069	0.6333	0.5849	0.0053	0.0052	0.822	0.8063	0.7925	0.782	0.6946	0.6404	0.567	0	0	0.7975	0.8148	0.7994	0.781	0.7116	0.6404	0.5649	0.0043	0.001
672	0.803	0.8071	0.8102	0.7682	0.7121	0.638	0.5908	0.0061	0.0062	0.8281	0.8077	0.7947	0.7869	0.6979	0.6448	0.5722	0.0002	0	0.8026	0.8153	0.8007	0.7849	0.7158	0.6453	0.5701	0.0049	0.0017
675	0.8056	0.8082	0.81	0.7709	0.7162	0.6409	0.5955	0.0058	0.0056	0.8291	0.8073	0.7958	0.7899	0.7016	0.648	0.5759	0	0	0.8042	0.8155	0.802	0.7871	0.7191	0.6485	0.5744	0.0046	0.001
678	0.8076	0.8097	0.8122	0.7722	0.7166	0.6439	0.5985	0.0051	0.0051	0.8288	0.8098	0.795	0.7903	0.6995	0.6493	0.5785	0	0	0.8036	0.8174	0.8047	0.7867	0.7191	0.65	0.5771	0.0041	0
681	0.8064	0.8113	0.8137	0.7751	0.7201	0.6476	0.603	0.0052	0.005	0.8378	0.8115	0.7984	0.7932	0.7044	0.6551	0.584	0	0	0.8091	0.8201	0.8054	0.7902	0.7231	0.6549	0.5824	0.0041	0.0003
684	0.8087	0.8123	0.8152	0.7769	0.7233	0.6509	0.6073	0.005	0.0051	0.84	0.8128	0.8	0.7961	0.7072	0.6582	0.5889	0	0	0.8049	0.8207	0.8066	0.7928	0.7267	0.6577	0.5863	0.004	0.0004
687	0.8124	0.8138	0.8158	0.779	0.7256	0.6531	0.6113	0.0052	0.0052	0.84	0.814	0.8011	0.7977	0.7093	0.6615	0.5922	0	0	0.8071	0.822	0.8077	0.794	0.7289	0.6598	0.5894	0.0043	0.0002
690	0.8115	0.8149	0.816	0.7809	0.7283	0.6572	0.6143	0.005	0.0054	0.8423	0.8152	0.8009	0.7992	0.7109	0.6631	0.5962	0	0	0.8134	0.8221	0.8105	0.7949	0.7318	0.6628	0.5926	0.0041	0
693	0.8127	0.8167	0.8199	0.7833	0.7314	0.6601	0.6186	0.0052	0.0051	0.8463	0.8183	0.8047	0.803	0.7151	0.6685	0.6004	0	0	0.8121	0.8253	0.8115	0.7979	0.7346	0.6672	0.5972	0.0042	0.0002
696	0.8133	0.8176	0.8201	0.7853	0.734	0.6636	0.6241	0.0057	0.006	0.8463	0.8185	0.8054	0.8045	0.7175	0.6713	0.6049	0	0	0.8135	0.8259	0.8125	0.799	0.7385	0.6714	0.6025	0.0047	0.0008
699	0.8152	0.8191	0.8211	0.7861	0.7377	0.6671	0.6278	0.0055	0.0058	0.8421	0.8195	0.8067	0.8071	0.7211	0.6756	0.6083	0	0	0.8162	0.8268	0.8143	0.8011	0.7419	0.6743	0.6063	0.0044	0.0003
702	0.813	0.8202	0.8226	0.7875	0.7403	0.6703	0.6321	0.0052	0.0055	0.8433	0.8204	0.8078	0.8084	0.7236	0.6782	0.6122	0	0	0.8162	0.8281	0.8156	0.8028	0.7474	0.6779	0.6103	0.0041	0.0006
705	0.815	0.8211	0.8235	0.7895	0.743	0.6737	0.6353	0.0054	0.0055	0.8462	0.8222	0.8081	0.8103	0.7261	0.6807	0.6159	0	0	0.8162	0.8297	0.8168	0.8041	0.7551	0.6803	0.6139	0.0043	0.0004
708	0.8179	0.8229	0.8254	0.7923	0.7418	0.6759	0.6389	0.005	0.005	0.8504	0.8247	0.8097	0.8121	0.7264	0.6847	0.619	0	0	0.8178	0.8321	0.8183	0.806	0.7557	0.6833	0.6177	0.0013	0.0009
711	0.814	0.8239	0.8258	0.7928	0.7484	0.6803	0.6429	0.0037	0.005	0.8514	0.8263	0.8101	0.8137	0.7337	0.6871	0.6234	0	0	0.8186	0.8321	0.8189	0.807	0.7633	0.6879	0.6218	0.0039	0
714	0.8198	0.8249	0.8327	0.7954	0.7511	0.6838	0.6474	0.0052	0.0055	0.8563	0.8286	0.8142	0.8154	0.741	0.6904	0.6297	0	0	0.8208	0.8339	0.8258	0.809	0.766	0.6911	0.6261	0.0041	0.0009
717	0.823	0.826	0.8345	0.7969	0.7521	0.6864	0.6496	0.0036	0.0049	0.8593	0.8297	0.8151	0.8173	0.7438	0.6947	0.6302	0	0	0.8224	0.8362	0.8273	0.8101	0.7668	0.6937	0.6279	0.004	0.0009
720	0.8184	0.8273	0.8357	0.8024	0.7553	0.6898	0.6539	0.004	0.0054	0.8595	0.8305	0.8167	0.8193	0.7488	0.6972	0.6344	0	0	0.8233	0.837	0.8289	0.8127	0.7695	0.6978	0.6327	0.0041	0.0009
723	0.8243	0.8285	0.8367	0.7999	0.7576	0.6936	0.6577	0.0041	0.0052	0.8592	0.8322	0.8172	0.8203	0.7508	0.7018	0.638	0	0	0.8254	0.8384	0.8295	0.8141	0.7716	0.7012	0.6357	0.0042	0.0004
726	0.8213	0.8292	0.8377	0.8025	0.761	0.6964	0.6619	0.0041	0.0051	0.8586	0.8334	0.8182	0.8215	0.7549	0.7055	0.6417	0	0	0.827	0.8403	0.8316	0.8158	0.7758	0.7062	0.6401	0.0041	0.0006
729	0.8222	0.83	0.8385	0.8024	0.7633	0.6988	0.665	0.0038	0.0051	0.8564	0.8342	0.8186	0.8232	0.7561	0.7081	0.6487	0	0	0.8288	0.842	0.8325	0.8174	0.7787	0.7068	0.6432	0.0039	0.0003
732	0.8245	0.8305	0.8403	0.8036	0.7651	0.7016	0.6691	0.0043	0.0052	0.8585	0.8351	0.8204	0.826	0.7595	0.7112	0.649	0	0	0.8319	0.8441	0.8342	0.8205	0.7785	0.7111	0.6475	0.0044	0.0001
735	0.8248	0.8321	0.8416	0.8056	0.7728	0.7063	0.6725	0.004	0.0051	0.864	0.8361	0.8209	0.8266	0.7613	0.7155	0.6526	0	0	0.8344	0.8461	0.835	0.8212	0.7822	0.7139	0.6506	0.0042	0.0009
738	0.8267	0.8329	0.8438	0.8067	0.7783	0.7103	0.6769	0.0044	0.0055	0.8669	0.8393	0.8229	0.8292	0.7647	0.7186	0.6567	0	0	0.8374	0.8476	0.8373	0.8252	0.7836	0.7182	0.6555	0.0048	0.0009
741	0.8307	0.8339	0.8444	0.8087	0.7845	0.7138	0.6799	0.0039	0.0049	0.8674	0.8396	0.8227	0.8297	0.7664	0.7207	0.6605	0	0	0.8368	0.848	0.8384	0.8261	0.7864	0.719	0.6583	0.0042	0.0012
744	0.8253	0.8342	0.851	0.8094	0.786	0.7161	0.6831	0.0041	0.0049	0.8652	0.8401	0.8302	0.8321	0.7683	0.723	0.6634	0	0	0.838	0.8503	0.8437	0.8276	0.7875	0.7227	0.6614	0.0041	0.0007
747	0.8281	0.8354	0.8525	0.8118	0.7898	0.7193	0.6867	0.0041	0.0052	0.8633	0.8425	0.8258	0.8343	0.7711	0.7252	0.6679	0	0	0.8391	0.8516	0.8452	0.8306	0.79	0.7252	0.6652	0.0048	0.0012
750	0.8296	0.8376	0.8543	0.8128	0.7899	0.7219	0.6936	0.0041	0.005	0.8654	0.844	0.8271	0.8352	0.7718	0.7286	0.6711	0	0	0.8408	0.8534	0.8462	0.832	0.7902	0.7278	0.6728	0.0046	0.0016
753	0.8286	0.8381	0.8554	0.8136	0.7947	0.725	0.6977	0.0042	0.0052	0.8654	0.8452	0.8342	0.8368	0.7751	0.731	0.6746	0	0	0.841	0.8524	0.8469	0.834	0.7935	0.7301	0.6759	0.0048	0.0016
756	0.8364	0.8361	0.8543	0.8144	0.7963	0.7273	0.7017	0.004	0.0048	0.869	0.8451	0.8286	0.8376	0.7769	0.7341	0.6771	0	0	0.8421	0.8505	0.8485	0.837	0.7936	0.7334	0.6801	0.0048	0.0016
759	0.8307	0.8361	0.8578	0.8156	0.7984	0.7308	0.7057	0.0043	0.005	0.8717	0.8467	0.8318	0.8389	0.7778	0.7358	0.6822	0	0	0.8441	0.8517	0.8506	0.84	0.7962	0.7379	0.6834	0.0049	0.0012
762	0.8304	0.8374	0.8592	0.8174	0.8022	0.7343	0.7095	0.004	0.0049	0.8718	0.8488	0.8309	0.8404	0.7825	0.7398	0.683	0	0	0.8459	0.8561	0.8516	0.8422	0.8004	0.7413	0.6862	0.0047	0
765	0.8352	0.8387	0.8606	0.8182	0.8038	0.736	0.7132	0.0041	0.005	0.8712	0.8513	0.8313	0.841	0.7821	0.7426	0.6871	0	0	0.8469	0.8552	0.8537	0.8419	0.8	0.7446	0.6905	0.0049	0
768	0.8307	0.8387	0.8622	0.8205	0.8053	0.7401	0.7171	0.0042	0.0051	0.8722	0.8503	0.8329	0.8422	0.7854	0.7457	0.6904	0	0	0.8484	0.8561	0.8554	0.8428	0.804	0.7494	0.6937	0.0054	0.0014
771	0.8336	0.8415	0.8657	0.8223	0.8077	0.7426	0.7207	0.0031	0.0051	0.8751	0.8544	0.8349	0.8445	0.7867	0.7493	0.6931	0	0	0.8524	0.8606	0.858	0.8446	0.8057	0.7551	0.6972	0.0055	0
774	0.8342	0.8416	0.8666	0.8232	0.8103	0.7461	0.7232	0.0046	0.0055	0.8738	0.854	0.8355	0.8455	0.7899	0.7538	0.697	0	0	0.8521	0.8597	0.8593	0.8471	0.808	0.7642	0.7009	0.0058	0
777	0.8345	0.8423	0.8683	0.8247	0.8128	0.7493	0.7267	0.0041	0.0054	0.8743	0.8553	0.8369	0.8465	0.7917	0.7589	0.6999	0	0	0.8551	0.8611	0.8603	0.8482	0.8097	0.7712	0.7047	0.0059	0
780	0.8381	0.8446	0.8701	0.8253	0.8128	0.7498	0.7283	0.0039	0.0055	0.8822	0.8572	0.839	0.8459	0.792	0.763	0.7031	0	0	0.8591	0.8644	0.862	0.85	0.8094	0.7721	0.7065	0.0061	0
783	0.8398	0.843	0.8717	0.8262	0.8144	0.7528	0.7322	0.004	0.0053	0.8829	0.8585	0.8408	0.848	0.7935	0.7698	0.7071	0	0	0.861	0.8653	0.8649	0.8515	0.8114	0.7745	0.7102	0.0061	0
786	0.8362	0.8456	0.8729	0.8272	0.8179	0.7558	0.736	0.0058	0.0062	0.8788	0.8593	0.8405	0.8491	0.7941	0.7734	0.7111	0	0	0.8628	0.865	0.8666	0.8526	0.8126	0.778	0.7152	0.0068	0
789	0.8378	0.8468	0.874	0.8285	0.8195	0.7585	0.738	0.0049	0.0055	0.8812	0.8604	0.8421	0.85	0.796	0.7774	0.7145	0	0	0.864	0.8653	0.8689	0.8539	0.8134	0.7808	0.7166	0.0059	0
792	0.8401	0.8478	0.8762	0.83	0.8217	0.7614	0.7415	0.0043	0.0056	0.8828	0.8633	0.8429	0.8511	0.7983	0.7808	0.718	0	0	0.8639	0.8684	0.8705	0.8569	0.8155	0.7844	0.7205	0.0062	0
795	0.8383	0.8481	0.8742	0.8331	0.8234	0.7642	0.7444	0.005	0.0055	0.8817	0.8624	0.843	0.8502	0.8	0.783	0.7199	0	0	0.8632	0.8692	0.8707	0.8579	0.817	0.7862	0.7226	0.0061	0
798	0.839	0.8508	0.8757	0.8322	0.8259	0.7687	0.7472	0.005	0.0055	0.8846	0.8647	0.8452	0.8533	0.8021	0.7859	0.7233	0	0	0.8638	0.8711	0.8714	0.8608	0.8192	0.7888	0.7257	0.0063	0
801	0.8401	0.8509	0.8773	0.8335	0.8273	0.7742	0.7512	0.0051	0.0056	0.8848	0.8652	0.8464	0.8543	0.8035	0.7891	0.7271	0	0	0.8613	0.8716	0.8739	0.8614	0.8205	0.7915	0.7285	0.006	0
804	0.8424	0.8526	0.8794	0.8344	0.8293	0.7828	0.7534	0.0052	0.0055	0.8859	0.8667	0.8482	0.8559	0.8047	0.7912	0.7295	0	0	0.8626	0.8734	0.8734	0.8631	0.8228	0.794	0.732	0.006	0
807	0.8402	0.8516	0.8811	0.8348	0.8305	0.7871	0.7564	0.005	0.0054	0.8852	0.8676	0.8504	0.8569	0.8053	0.7928	0.7324	0	0	0.8638	0.8728	0.8743	0.8639	0.8236	0.7953	0.734	0.0059	0
810	0.8413	0.8541	0.8767	0.8353	0.8269	0.7904	0.7602	0.005	0.0055	0.8857	0.8689	0.8482	0.8576	0.8056	0.795	0.7341	0	0	0.8646	0.8748	0.8704	0.8651	0.8206	0.7976	0.7373	0.0058	0
813	0.841	0.8544	0.8791	0.8375	0.8328	0.7921	0.7614	0.0046	0.0049	0.8863	0.869	0.8483	0.8575	0.8082	0.7991	0.7374	0	0	0.8651	0.8749	0.8754	0.8678	0.8256	0.8	0.7402	0.0056	0
816	0.8422	0.8554	0.8811	0.8394	0.8355	0.7969	0.7652	0.0051	0.0057	0.8874	0.8698	0.8503	0.8592	0.8102	0.801	0.742	0	0	0.867	0.8758	0.8796	0.8727	0.8279	0.8028	0.7433	0.006	0
819	0.8417	0.8569	0.883	0.8396	0.8325	0.7995	0.7684	0.0049	0.0054	0.887	0.8715	0.8514	0.8602	0.8108	0.8027	0.7428	0	0	0.8667	0.8748	0.8799	0.8757	0.8263	0.8045	0.7462	0.0056	0
822	0.842	0.8578	0.8845	0.8412	0.8375	0.8021	0.7708	0.0048	0.0053	0.8875	0.8733	0.8517	0.8605	0.8138	0.8051	0.7461	0	0	0.8687	0.8759	0.8815	0.8715	0.8306	0.8057	0.7494	0.0056	0
825	0.8604	0.8567	0.887	0.8435	0.8397	0.8055	0.775	0.0053	0.0062	0.889	0.8751	0.8547	0.8633	0.8172	0.8084	0.7507	0	0	0.8707	0.8782	0.8843	0.8754	0.8347	0.8089	0.7537	0.0063	0
828	0.8434	0.8594	0.8893	0.8474	0.8376	0.8082	0.7786	0.0055	0.0062	0.8892	0.8767	0.8559	0.8641	0.8161	0.8098	0.7531	0	0	0.87	0.8786	0.8859	0.8768	0.8318	0.8112	0.7567	0.0064	0
831	0.8426	0.8572	0.8889	0.8468	0.8424	0.8102	0.7824	0.0048	0.0057	0.89	0.8763	0.8565	0.8647	0.82	0.8122	0.7564	0	0	0.8704	0.8795	0.8836	0.8787	0.8371	0.8126	0.7603	0.0057	0
834	0.8445	0.8592	0.8884	0.8487	0.8433	0.8126	0.7892	0.0046	0.0055	0.8906	0.8769	0.8588	0.8662	0.8212	0.814	0.7595	0	0	0.8709	0.881	0.8832	0.8809	0.839	0.8142	0.7643	0.0055	0
837	0.8437	0.8617	0.8906	0.8505	0.8448	0.8143	0.7965	0.0047	0.0055	0.8902	0.8774	0.8597	0.8674	0.8228	0.8154	0.7635	0	0	0.8699	0.8817	0.8851	0.8813	0.8399	0.8166	0.7705	0.0054	0
840	0.8456	0.863	0.8913	0.8537	0.8479	0.8166	0.8002	0.0049	0.006	0.895	0.8778	0.8623	0.8692	0.8241	0.8169	0.7701	0	0	0.8733	0.8813	0.8865	0.8825	0.8408	0.8189	0.7784	0.0055	0
843	0.8534	0.8625	0.8941	0.8532	0.8469	0.8182	0.8028	0.0048	0.0055	0.8919	0.8791	0.8634	0.8691	0.8248	0.8186	0.7755	0	0	0.8706	0.8834	0.891	0.8831	0.8418	0.8203	0.7826	0.0054	0
846	0.8445	0.864	0.8955	0.8551	0.8476	0.8191	0.8052	0.0048	0.0057	0.8929	0.881	0.8618	0.8699	0.8263	0.8195	0.7807	0	0	0.8706	0.8852	0.8947	0.8868	0.8424	0.8216	0.7845	0.0055	0
849	0.8464	0.8624	0.8974	0.8591	0.851	0.8228	0.8096	0.0052	0.0062	0.8949	0.8811	0.8677	0.8737	0.8298	0.8228	0.7825	0	0	0.8716	0.8845	0.891	0.8909	0.8461	0.8252	0.789	0.0058	0
852	0.8477	0.8618	0.8987	0.8593	0.8522	0.8245	0.8123	0.005	0.0059	0.8975	0.8819	0.8674	0.8739	0.83	0.8245	0.7862	0	0	0.8726	0.8865	0.8923	0.8935	0.8476	0.8264	0.7924	0.0093	0
855	0.8481	0.8623	0.8949	0.8618	0.8544	0.8221	0.8152	0.0049	0.006	0.896	0.8834	0.8664	0.8766	0.8315	0.8241	0.7887	0	0	0.8716	0.8867	0.8901	0.8991	0.8501	0.8246	0.7952	0.0051	0
858	0.8468	0.8634	0.8999	0.862	0.8533	0.8276	0.8181	0.0066	0.006	0.8922	0.8845	0.8679	0.8754	0.8313	0.8275	0.7915	0.001	0	0.8661	0.8883	0.8949	0.8988	0.8495	0.8302	0.7986	0.009	0
861	0.8496	0.8696	0.9016	0.8648	0.8565	0.8316	0.8227	0.0062	0.0071	0.8951	0.8877	0.8702	0.878	0.8315	0.8308	0.7962	0	0	0.8694	0.8913	0.8982	0.9006	0.8528	0.8334	0.8027	0.0103	0
864	0.8509	0.8655	0.8956	0.8655	0.8566	0.832	0.8236	0.005	0.006	0.8962	0.885	0.8668	0.8787	0.8351	0.8314	0.7975	0	0	0.8684	0.8888	0.8933	0.9009	0.8533	0.8338	0.8037	0.0089	0
867	0.8512	0.8669	0.9015	0.8689	0.8584	0.8296	0.826	0.0064	0.0059	0.8967	0.8864	0.8709	0.8806	0.8336	0.8328	0.8028	0.0006	0	0.8689	0.8902	0.8989	0.9041	0.8547	0.8314	0.8065	0.0091	0
870	0.8483	0.8674	0.9009	0.8699	0.8584	0.8299	0.8278	0.0045	0.0056	0.8951	0.8859	0.8689	0.8823	0.8382	0.8336	0.8019	0	0	0.8671	0.8903	0.8962	0.9077	0.8556	0.8321	0.8088	0.0085	0
873	0.8504	0.8689	0.903	0.8715	0.8596	0.8319	0.8293	0.005	0.006	0.8952	0.8873	0.8713	0.8833	0.8342	0.8345	0.8041	0	0	0.8666	0.8909	0.8981	0.9092	0.8569	0.8336	0.8101	0.0091	0
876	0.8508	0.8731	0.8967	0.872	0.8599	0.8333	0.8313	0.0048	0.0058	0.8951	0.8879	0.8716	0.8831	0.8347	0.8354	0.8061	0	0	0.8667	0.8913	0.9001	0.9077	0.8575	0.8351	0.812	0.0088	0
879	0.8532	0.8701	0.899	0.876	0.8603	0.8331	0.8324	0.0065	0.0059	0.8977	0.8898	0.8746	0.8842	0.8351	0.8369	0.8086	0.0005	0	0.8683	0.8935	0.904	0.9096	0.8559	0.8362	0.8145	0.0088	0
882	0.8527	0.8731	0.8989	0.8722	0.862	0.8344	0.8342	0.0063	0.0058	0.8981	0.889	0.8734	0.884	0.8371	0.8385	0.8098	0.0004	0	0.8673	0.8927	0.902	0.911	0.8587	0.8374	0.8159	0.0088	0
885	0.851	0.874	0.9005	0.8736	0.8681	0.8387	0.8385	0.0065	0.0063	0.8935	0.887	0.8737	0.8865	0.8395	0.841	0.8135	0.0008	0	0.864	0.8913	0.9018	0.9144	0.8659	0.8405	0.8202	0.0091	0
888	0.8534	0.8726	0.9053	0.876	0.869	0.8379	0.8394	0.006	0.0059	0.8946	0.8875	0.8778	0.8875	0.841	0.8431	0.815	0.0003	0	0.8637	0.8912	0.9037	0.9167	0.8659	0.8419	0.821	0.0085	0
891	0.853	0.874	0.9066	0.8762	0.8685	0.8391	0.84	0.0059	0.0056	0.8962	0.8877	0.8773	0.8864	0.8396	0.8425	0.817	0	0	0.8644	0.8914	0.904	0.9153	0.8654	0.8417	0.8221	0.008	0
894	0.8561	0.877	0.9092	0.8803	0.8707	0.8403	0.8419	0.0059	0.0058	0.8968	0.8891	0.8782	0.8884	0.8413	0.8447	0.8171	0.0001	0	0.865	0.8924	0.9098	0.9169	0.8644	0.844	0.8247	0.0085	0
897	0.8546	0.877	0.9075	0.8786	0.8711	0.8414	0.8435	0.0054	0.0053	0.8958	0.8867	0.8758	0.8883	0.8422	0.8454	0.8195	0	0	0.8636	0.891	0.9078	0.9177	0.8673	0.8446	0.8263	0.0078	0
900	0.858	0.8783	0.9112	0.8817	0.8734	0.8428	0.8457	0.0062	0.0061	0.8972	0.8885	0.8794	0.8909	0.8439	0.8477	0.8223	0.0002	0	0.865	0.8928	0.9107	0.9217	0.8655	0.8469	0.8286	0.0086	0
903	0.8583	0.8786	0.9133	0.8824	0.8747	0.8456	0.8468	0.0062	0.006	0.897	0.888	0.8812	0.8917	0.845	0.8495	0.8235	0.0004	0	0.8642	0.8916	0.9108	0.923	0.8681	0.8488	0.8301	0.0088	0
906	0.8587	0.8797	0.9141	0.882	0.8761	0.8462	0.8487	0.0067	0.0064	0.8962	0.889	0.883	0.8933	0.8459	0.8508	0.8259	0.0006	0	0.8642	0.8921	0.9116	0.9244	0.8671	0.8498	0.8319	0.0087	0
909	0.8592	0.8814	0.9144	0.8866	0.8777	0.8474	0.8511	0.0062	0.0061	0.8937	0.8875	0.8818	0.8947	0.848	0.853	0.828	0.0001	0	0.8608	0.8905	0.9109	0.9265	0.8693	0.8518	0.834	0.0086	0
912	0.8607	0.8823	0.9171	0.8867	0.8785	0.8487	0.8527	0.0066	0.0066	0.8963	0.8887	0.8843	0.8957	0.8487	0.8535	0.8296	0.0007	0	0.8636	0.8917	0.9115	0.9304	0.87	0.8523	0.8357	0.0093	0
915	0.8644	0.8826	0.9175	0.8893	0.8779	0.8494	0.8548	0.0063	0.0063	0.8972	0.8889	0.8898	0.8932	0.8498	0.8546	0.8311	0.0005	0	0.864	0.8927	0.9132	0.9301	0.8704	0.8532	0.8373	0.0091	0
918	0.8628	0.8825	0.9181	0.8902	0.8803	0.8511	0.8552	0.0065	0.0064	0.8947	0.888	0.8879	0.8962	0.851	0.8561	0.8329	0.0006	0	0.8625	0.8915	0.9138	0.9308	0.8707	0.8551	0.8387	0.0092	0
921	0.8645	0.8797	0.9197	0.892	0.8812	0.8512	0.8562	0.0067	0.0067	0.895	0.8886	0.8889	0.8966	0.8522	0.858	0.8342	0.0006	0	0.863	0.8915	0.9156	0.9353	0.872	0.8562	0.8396	0.0093	0
924	0.8661	0.8825	0.9212	0.8937	0.8824	0.853	0.8586	0.0067	0.0067	0.895	0.8886	0.8906	0.8969	0.854	0.859	0.8368	0.0008	0	0.863	0.8921	0.9167	0.9354	0.8762	0.8582	0.8424	0.0097	0
927	0.8638	0.8806	0.9214	0.8936	0.8822	0.8548	0.8613	0.0068	0.0069	0.8942	0.8882	0.8906	0.8974	0.8561	0.8601	0.8377	0.0009	0	0.8633	0.8927	0.9169	0.9364	0.8773	0.8591	0.8442	0.0096	0.0043
930	0.8642	0.8827	0.9221	0.8928	0.8829	0.8559	0.8585	0.0061	0.006	0.8925	0.8896	0.8951	0.8987	0.8591	0.862	0.8375	0.0001	0	0.8622	0.8958	0.9181	0.9365	0.8787	0.8601	0.8416	0.0086	0.0035
933	0.864	0.8832	0.9224	0.8937	0.8849	0.8579	0.8592	0.0063	0.0062	0.8898	0.8894	0.8942	0.901	0.8597	0.8621	0.8385	0.0002	0	0.8596	0.8953	0.9174	0.939	0.8775	0.8615	0.8408	0.0087	0.0034
936	0.8647	0.8816	0.9235	0.8935	0.8853	0.8581	0.8608	0.0063	0.0062	0.8905	0.8891	0.8956	0.9017	0.8604	0.8635	0.8401	0.0003	0	0.86	0.8956	0.9183	0.9395	0.8816	0.8628	0.844	0.0087	0.0035
939	0.8646	0.8825	0.9242	0.8955	0.8873	0.8597	0.8609	0.0067	0.0067	0.8907	0.8893	0.8963	0.9028	0.8617	0.8654	0.842	0.0007	0	0.8595	0.895	0.9184	0.9401	0.8827	0.864	0.8461	0.0094	0.0039
942	0.8642	0.8834	0.9244	0.8988	0.8865	0.8609	0.8632	0.006	0.0061	0.8887	0.8889	0.8977	0.9035	0.8619	0.8661	0.8424	0.0001	0	0.8582	0.8951	0.9188	0.9408	0.8825	0.8645	0.8468	0.0085	0.0031
945	0.8637	0.8805	0.9243	0.8975	0.8887	0.8671	0.8641	0.006	0.006	0.8888	0.8881	0.899	0.9047	0.8636	0.8686	0.8442	0	0	0.8577	0.8945	0.9188	0.9404	0.8846	0.8702	0.8486	0.0088	0.003
948	0.8639	0.8825	0.9255	0.8978	0.8897	0.8683	0.8661	0.0061	0.0062	0.8878	0.8889	0.9012	0.9053	0.8651	0.8697	0.8451	0.0002	0	0.8574	0.8953	0.9199	0.9415	0.8848	0.8708	0.8496	0.009	0.0029
951	0.8627	0.8805	0.925	0.8987	0.8907	0.8695	0.8669	0.006	0.006	0.8875	0.8878	0.8997	0.9056	0.8665	0.8702	0.8461	0	0	0.856	0.8943	0.919	0.9415	0.8849	0.8727	0.8511	0.0088	0.0028
954	0.8642	0.882	0.9262	0.9009	0.8925	0.8714	0.8698	0.0064	0.0064	0.888	0.8884	0.9007	0.9069	0.8684	0.8723	0.8484	0.0004	0	0.8572	0.8954	0.9243	0.9425	0.8886	0.8739	0.853	0.0094	0.0025
957	0.8645	0.8834	0.9267	0.9064	0.894	0.8726	0.8711	0.0066	0.0066	0.887	0.8891	0.9013	0.9081	0.8694	0.8733	0.8504	0.0006	0	0.8568	0.8957	0.9209	0.9429	0.8888	0.8756	0.8541	0.0095	0.0027
960	0.8642	0.8826	0.927	0.9057	0.8951	0.8735	0.8728	0.0064	0.0066	0.8869	0.8885	0.9015	0.9093	0.8702	0.8746	0.8513	0.0004	0	0.8557	0.8953	0.9211	0.943	0.8905	0.8768	0.8558	0.0096	0.0027
963	0.8635	0.8827	0.9271	0.9079	0.8959	0.8752	0.8734	0.0059	0.0058	0.8865	0.8881	0.9016	0.9098	0.8694	0.8745	0.8522	0	0	0.8554	0.8953	0.9238	0.9431	0.887	0.8761	0.8545	0.0089	0.0022
966	0.8642	0.8827	0.9271	0.9091	0.8961	0.8755	0.8751	0.0063	0.0063	0.8858	0.8879	0.9018	0.9085	0.8701	0.8754	0.8537	0.0004	0	0.8541	0.8948	0.922	0.9426	0.8896	0.8781	0.857	0.0094	0.0026
969	0.8646	0.8827	0.927	0.91	0.8989	0.877	0.8775	0.0064	0.0066	0.8859	0.888	0.9027	0.9107	0.8736	0.8774	0.8547	0.0005	0	0.8538	0.8947	0.9218	0.9437	0.8918	0.8796	0.8585	0.0096	0.0025
972	0.8682	0.8872	0.9325	0.9156	0.9048	0.8836	0.884	0.0118	0.0119	0.8903	0.8931	0.9072	0.9159	0.8773	0.8826	0.8596	0.0056	0.0011	0.8577	0.8999	0.9275	0.9482	0.8956	0.8848	0.8641	0.0148	0.0075
975	0.8629	0.8825	0.9272	0.9125	0.9006	0.8794	0.8798	0.0065	0.0067	0.881	0.8887	0.9023	0.9106	0.8729	0.8788	0.8556	0.0004	0	0.8486	0.8958	0.9232	0.9428	0.8911	0.8816	0.86	0.01	0.0023
978	0.8606	0.8813	0.9256	0.9107	0.9008	0.8799	0.88	0.0058	0.0057	0.8798	0.8873	0.9012	0.9103	0.8725	0.8789	0.8557	0	0	0.8466	0.894	0.922	0.9421	0.8904	0.8809	0.8606	0.0088	0.0017
981	0.8689	0.8813	0.9257	0.9125	0.9022	0.8809	0.8814	0.0058	0.0058	0.8795	0.8872	0.9017	0.9115	0.8736	0.88	0.8568	0	0	0.8458	0.8939	0.9238	0.9421	0.8921	0.8824	0.8619	0.009	0.0016
984	0.8587	0.881	0.9249	0.9142	0.9032	0.8829	0.8841	0.006	0.006	0.8778	0.8867	0.9021	0.9124	0.8748	0.8813	0.8575	0	0	0.8438	0.8932	0.9218	0.942	0.8923	0.8837	0.8627	0.0092	0.0018
987	0.86	0.8811	0.9251	0.9144	0.9046	0.8848	0.885	0.0063	0.0062	0.8784	0.8874	0.9029	0.9132	0.8763	0.8827	0.8594	0.0001	0	0.8434	0.8937	0.9229	0.9421	0.8936	0.8844	0.8652	0.0096	0.0022
990	0.8592	0.8811	0.9248	0.9152	0.9057	0.8853	0.8869	0.0067	0.0066	0.8768	0.8872	0.9035	0.9132	0.8778	0.8838	0.8603	0.0007	0	0.8425	0.8938	0.923	0.9419	0.8948	0.8866	0.8654	0.0056	0.0021
993	0.8586	0.8817	0.9234	0.9164	0.9065	0.8881	0.8889	0.0065	0.0065	0.8768	0.8869	0.9024	0.9149	0.8778	0.883	0.8619	0.0002	0	0.8414	0.8929	0.9218	0.9411	0.8931	0.8848	0.8666	0.0055	0.0019
996	0.8596	0.8799	0.9224	0.9149	0.9064	0.8877	0.8906	0.0064	0.0064	0.8771	0.8858	0.9028	0.9133	0.8809	0.887	0.865	0.0004	0	0.8416	0.8913	0.9216	0.9403	0.8975	0.8894	0.8713	0.0056	0.0019
999	0.8585	0.8802	0.9223	0.9156	0.9083	0.8884	0.8902	0.0067	0.0066	0.8746	0.886	0.9026	0.9153	0.8799	0.8871	0.8651	0.0007	0	0.8401	0.8911	0.9215	0.94	0.8971	0.8894	0.8696	0.0061	0.0017
1002	0.8577	0.8799	0.9212	0.9156	0.9087	0.8894	0.8932	0.0069	0.0068	0.8742	0.8855	0.9026	0.9164	0.8807	0.8869	0.8664	0.0006	0	0.8389	0.8901	0.9209	0.9397	0.8971	0.8901	0.8711	0.0059	0.0015
1005	0.8573	0.8803	0.9203	0.9148	0.9083	0.8898	0.8924	0.0072	0.0071	0.8767	0.8853	0.901	0.9143	0.8799	0.8881	0.8677	0.0012	0	0.8406	0.8895	0.9215	0.9384	0.8975	0.8892	0.873	0.0063	0.0014
1008	0.8554	0.8789	0.9191	0.915	0.9088	0.8902	0.8947	0.0071	0.0076	0.8724	0.8841	0.9008	0.9145	0.8823	0.8896	0.8686	0.0014	0	0.8375	0.8886	0.9195	0.9375	0.8998	0.8925	0.8755	0.0064	0.0024

## Sheet: gradient culture of S. aureus
DATA(x)	A1_DATA(y)	B1_DATA(y)	C1_DATA(y)	D1_DATA(y)	E1_DATA(y)	F1_DATA(y)	G1_DATA(y)	H1_DATA(y)	A2_DATA(y)	B2_DATA(y)	C2_DATA(y)	D2_DATA(y)	E2_DATA(y)	F2_DATA(y)	G2_DATA(y)	H2_DATA(y)	A3_DATA(y)	B3_DATA(y)	C3_DATA(y)	D3_DATA(y)	E3_DATA(y)	F3_DATA(y)	G3_DATA(y)	H3_DATA(y)	A4_DATA(y)	B4_DATA(y)	C4_DATA(y)
0	0	0	0	0	0	0	0	0	0	0	0	0	0	0	0	0	0	0	0	0	0	0	0	0	0	0	0
3	0.0016	0.0012	0.0009	0.0005	0.0037	0.0003	0.0026	0	0	0.001	0.0006	0.0006	0.0003	0.0006	0.0013	0.0024	0.0008	0	0.0006	0.0009	0.0006	0.0013	0.0011	0.0015	0.0032	0	0
6	0.0011	0	0.0004	0	0.0001	0	0	0	0	0.0005	0.0004	0	0	0	0	0	0	0.0004	0.0003	0.0025	0	0.0001	0.0004	0.0002	0	0	0
9	0.0022	0	0.0007	0.0008	0.0007	0.0004	0.0003	0	0	0.0016	0.0008	0	0	0	0.0001	0	0	0.001	0.0021	0.0033	0.0007	0.001	0.0013	0.0011	0.0004	0	0
12	0.0025	0	0.0001	0.0005	0.0004	0	0	0	0	0.0018	0.0003	0	0	0	0	0	0	0.001	0.0022	0.0028	0.0005	0.0006	0.0008	0.0008	0	0	0
15	0.003	0	0	0.0006	0.0005	0.0003	0	0	0	0.0021	0	0	0	0	0.0016	0	0	0	0.003	0.0029	0.0007	0.0011	0.0008	0.0052	0	0	0
18	0.004	0.0001	0.0002	0.001	0.0003	0	0	0	0	0.003	0.0005	0	0	0	0.0004	0	0	0	0.0041	0.0034	0.0016	0.0023	0	0.0017	0	0	0
21	0.0049	0.0003	0.0002	0.001	0.0007	0.0006	0	0	0	0.0038	0.0003	0	0	0	0.0019	0	0	0.0003	0.0047	0.0033	0.0014	0.0015	0.0015	0.0059	0	0	0
24	0.0061	0.0007	0.0003	0.0013	0.001	0.001	0	0	0	0.0055	0.0004	0	0	0	0.0021	0	0	0.001	0.0063	0.0038	0.002	0.0021	0.0019	0.0063	0	0	0
27	0.0067	0.0006	0	0.0011	0.0006	0.0006	0	0	0	0.006	0.0004	0	0	0	0.0016	0	0	0.0006	0.0063	0.0034	0.0017	0.0018	0.0018	0.0057	0	0	0
30	0.0086	0.0012	0.0003	0.0017	0.0014	0.001	0	0	0	0.0078	0.001	0	0	0	0.0019	0	0	0.0007	0.0086	0.004	0.0024	0.0025	0.0022	0.0061	0	0	0
33	0.0095	0.0014	0.0003	0.0015	0.0006	0.0004	0	0	0	0.0087	0.001	0	0	0	0.0004	0	0	0	0.0092	0.0044	0.0025	0.0034	0.0003	0.0021	0	0	0
36	0.0107	0.0012	0	0.0014	0.0009	0.0007	0	0	0	0.01	0.0008	0	0	0	0.0017	0	0	0.0006	0.011	0.0039	0.0021	0.0024	0.0022	0.0059	0	0	0
39	0.0125	0.0015	0	0.0014	0.0005	0.0003	0	0	0	0.0118	0.0011	0	0	0	0	0	0	0	0.0124	0.0043	0.0027	0.0035	0.0001	0.0021	0	0	0
42	0.0151	0.0024	0.0007	0.0023	0.0018	0.0014	0	0	0	0.0143	0.0017	0.0002	0	0	0.0021	0	0	0.0008	0.0149	0.0049	0.0029	0.0033	0.0029	0.0065	0	0	0
45	0.0174	0.0023	0.0005	0.002	0.0015	0.0012	0	0	0	0.0164	0.0016	0.0001	0	0	0.002	0	0	0.0008	0.0169	0.0048	0.0027	0.0033	0.0026	0.0064	0	0	0
48	0.0199	0.0022	0.0002	0.0017	0.0014	0.0009	0	0	0	0.0188	0.0015	0	0	0	0.0017	0	0	0.0003	0.0192	0.0047	0.0024	0.0029	0.0025	0.006	0	0	0
51	0.0227	0.0025	0.0003	0.0018	0.0015	0.0012	0	0	0	0.0216	0.0016	0	0	0	0.0014	0	0	0.0002	0.0219	0.005	0.0025	0.0028	0.0026	0.006	0	0	0
54	0.027	0.0036	0.0011	0.0025	0.0019	0.0017	0	0	0	0.0256	0.0027	0.0005	0.0003	0	0.001	0	0	0	0.0265	0.0062	0.0035	0.0047	0.0015	0.003	0	0	0
57	0.0298	0.0037	0.0007	0.0023	0.0019	0.0013	0	0	0	0.0287	0.0024	0	0	0	0.0017	0	0	0.0003	0.0289	0.0056	0.0027	0.0031	0.003	0.0062	0	0	0
60	0.0347	0.0042	0.0009	0.0025	0.0022	0.0017	0	0	0	0.0332	0.0031	0.0004	0	0	0.0021	0	0	0.0007	0.0333	0.0064	0.0031	0.0037	0.0036	0.0068	0	0	0
63	0.0373	0.0042	0.0006	0.0019	0.0018	0.0013	0	0	0	0.0355	0.0029	0	0	0	0.0017	0	0	0.0002	0.0357	0.0062	0.0027	0.0035	0.003	0.0061	0	0	0
66	0.0422	0.0045	0.0007	0.0022	0.0021	0.0013	0	0	0	0.0406	0.0033	0	0	0	0.0016	0	0	0.0004	0.0406	0.0066	0.0031	0.0035	0.0031	0.0061	0	0	0
69	0.0484	0.0057	0.0012	0.0027	0.0027	0.0018	0	0	0	0.0464	0.0043	0.0006	0	0	0.0019	0	0	0.0012	0.0465	0.0075	0.0035	0.0043	0.0035	0.0065	0	0	0
72	0.0543	0.0059	0.0011	0.0025	0.0024	0.0017	0	0	0	0.0522	0.0043	0.0002	0	0	0.0018	0	0	0.0006	0.0518	0.008	0.0035	0.0042	0.0036	0.0062	0	0	0
75	0.0611	0.0067	0.001	0.0022	0.0017	0.0013	0	0	0	0.0591	0.0052	0.0004	0.0001	0	0.0004	0	0	0	0.0591	0.0086	0.0039	0.0054	0.0012	0.0025	0	0	0
78	0.0704	0.0076	0.0013	0.0027	0.0025	0.0023	0	0	0	0.0664	0.0059	0.0005	0.0001	0	0.0016	0	0	0	0.0636	0.0093	0.0039	0.0053	0.0045	0.0055	0	0	0
81	0.0776	0.0081	0.0009	0.0026	0.0025	0.0016	0	0	0	0.0749	0.0064	0.0002	0	0	0.0015	0	0	0.0005	0.0743	0.0097	0.0035	0.0043	0.0037	0.006	0	0	0
84	0.0873	0.0091	0.0012	0.0027	0.0025	0.0017	0	0	0	0.0845	0.0074	0.0005	0	0	0.0016	0	0	0.001	0.0837	0.0106	0.0038	0.0046	0.0038	0.0063	0	0	0
87	0.0991	0.01	0.0009	0.0024	0.0022	0.0018	0	0	0	0.0947	0.0081	0.0002	0	0	0.0011	0	0	0	0.0913	0.0115	0.0038	0.0056	0.0047	0.0049	0	0	0
90	0.1102	0.0113	0.0015	0.0033	0.0029	0.0019	0	0	0	0.1059	0.0095	0.0009	0.0003	0	0.0017	0	0	0	0.1021	0.0125	0.0041	0.005	0.0039	0.0061	0	0	0
93	0.1207	0.0132	0.0017	0.0029	0.0029	0.0018	0	0	0	0.1167	0.011	0.0009	0	0	0.0015	0	0	0.0009	0.1128	0.0141	0.0042	0.0049	0.0041	0.0059	0	0	0
96	0.1266	0.0133	0.0013	0.0028	0.0013	0.0011	0	0	0	0.123	0.0113	0.0008	0.0002	0	0	0	0	0	0.1185	0.0144	0.0041	0.0059	0.0013	0.002	0	0	0
99	0.1351	0.0153	0.0014	0.0023	0.0023	0.0013	0	0	0	0.1312	0.013	0.0006	0	0	0.0012	0	0	0	0.1266	0.0159	0.0039	0.0048	0.0041	0.0052	0	0	0
102	0.144	0.0175	0.002	0.0028	0.0032	0.0018	0	0	0	0.1396	0.0151	0.0012	0	0	0.0015	0	0	0	0.1356	0.018	0.0044	0.0051	0.0045	0.0057	0	0	0
105	0.1533	0.0191	0.0016	0.0026	0.0024	0.0014	0	0	0	0.1493	0.0167	0.0009	0	0	0.0011	0	0	0	0.1448	0.0195	0.0043	0.0048	0.0043	0.0054	0	0	0
108	0.1633	0.0218	0.002	0.0026	0.0028	0.0016	0	0	0	0.1598	0.0192	0.0013	0	0	0.0011	0	0	0	0.1539	0.022	0.0046	0.0051	0.0045	0.0053	0	0	0
111	0.1723	0.0247	0.0025	0.0029	0.0019	0.0016	0	0	0	0.1696	0.0219	0.0019	0.0006	0	0.0002	0	0	0	0.1624	0.0246	0.0057	0.0068	0.0023	0.0022	0	0	0
114	0.1804	0.0272	0.0024	0.0026	0.0026	0.0015	0	0	0	0.1777	0.0243	0.0014	0	0	0.0008	0	0	0	0.1701	0.0268	0.0047	0.0051	0.0044	0.0051	0	0	0
117	0.1901	0.0308	0.0027	0.0029	0.0028	0.0017	0	0	0	0.187	0.0278	0.002	0	0	0.0009	0	0	0	0.179	0.0301	0.0052	0.0055	0.0048	0.0053	0	0	0
120	0.1994	0.0342	0.0031	0.0035	0.0027	0.0016	0	0	0	0.1964	0.0313	0.0024	0	0	0.0012	0	0	0	0.1874	0.0332	0.0053	0.0058	0.0051	0.0053	0	0	0
123	0.2088	0.0386	0.0033	0.0026	0.0025	0.0014	0	0	0	0.2056	0.0352	0.0024	0	0	0.0008	0	0	0	0.1967	0.0373	0.0053	0.0056	0.0049	0.005	0	0	0
126	0.2158	0.0417	0.0032	0.0024	0.0016	0.0009	0	0	0	0.2122	0.038	0.0024	0	0	0	0	0	0	0.2022	0.04	0.0057	0.0066	0.0023	0.0016	0	0	0
129	0.2274	0.0474	0.0043	0.0035	0.0032	0.0021	0	0	0	0.2238	0.0435	0.0036	0.0002	0	0.0011	0	0	0	0.2136	0.0454	0.0067	0.0061	0.0059	0.0054	0	0	0
132	0.2389	0.053	0.0049	0.0032	0.0028	0.0018	0	0	0	0.2351	0.0488	0.0038	0.0001	0	0.0007	0	0	0	0.225	0.0504	0.0065	0.0059	0.0052	0.005	0	0	0
135	0.2523	0.0591	0.005	0.0029	0.0026	0.0015	0	0	0	0.2479	0.0548	0.004	0	0	0.0005	0	0	0	0.2374	0.0563	0.0069	0.0057	0.0053	0.0048	0	0	0
138	0.2621	0.0665	0.0064	0.0033	0.0031	0.002	0	0	0	0.258	0.062	0.0049	0.0002	0	0.0009	0	0	0	0.2471	0.0635	0.0077	0.0064	0.0057	0.0052	0	0	0
141	0.2708	0.0742	0.0057	0.0032	0.0029	0.0016	0	0	0	0.267	0.0699	0.0066	0	0	0.0005	0	0	0	0.2561	0.0705	0.0117	0.006	0.0054	0.0047	0	0	0
144	0.2801	0.0833	0.0061	0.0029	0.0023	0.0013	0	0	0	0.276	0.0781	0.007	0	0	0.0004	0	0	0	0.2644	0.0789	0.0122	0.0061	0.0054	0.0046	0	0	0
147	0.2895	0.0933	0.0072	0.0029	0.0025	0.0015	0	0	0	0.2851	0.0881	0.0077	0	0	0	0	0	0	0.2732	0.0884	0.0128	0.0062	0.0053	0.0042	0	0	0
150	0.3041	0.1048	0.0084	0.0035	0.0029	0.0017	0	0	0	0.2998	0.0992	0.0093	0.0005	0	0.0004	0	0	0	0.2857	0.0994	0.0141	0.0069	0.0059	0.0045	0	0	0
153	0.3128	0.1164	0.0093	0.0034	0.0023	0.0011	0	0	0	0.309	0.1103	0.0099	0	0	0	0	0	0	0.2964	0.11	0.0146	0.0064	0.0055	0.0042	0	0	0
156	0.3184	0.1278	0.01	0.0033	0.0028	0.0013	0	0	0	0.3141	0.1214	0.0107	0.0001	0	0.0001	0	0	0	0.3025	0.1212	0.0155	0.0065	0.0057	0.0044	0	0	0
159	0.3225	0.1339	0.0114	0.0034	0.0024	0.0012	0	0	0	0.3181	0.1275	0.012	0	0	0	0	0	0	0.3062	0.1276	0.0166	0.0065	0.0051	0.004	0	0	0
162	0.3275	0.1408	0.0129	0.0035	0.0023	0.0012	0	0	0	0.3234	0.1337	0.0133	0.0002	0	0	0	0	0	0.3114	0.1337	0.0177	0.0065	0.0054	0.0038	0	0	0
165	0.3338	0.1511	0.0148	0.0038	0.0026	0.0013	0	0	0	0.3292	0.1436	0.0153	0.0006	0	0	0	0	0	0.317	0.1433	0.0194	0.0069	0.0056	0.0041	0	0	0
168	0.3389	0.1616	0.0175	0.0045	0.0032	0.0021	0	0	0	0.3337	0.1546	0.018	0.0013	0.0001	0.0007	0	0	0	0.3224	0.1539	0.0218	0.0076	0.0063	0.0044	0	0	0
171	0.3436	0.1736	0.0193	0.0044	0.0026	0.0017	0	0	0	0.3387	0.1661	0.0197	0.0014	0	0.0002	0	0	0	0.3269	0.1648	0.0233	0.008	0.0064	0.0041	0	0	0
174	0.3485	0.1827	0.0215	0.0042	0.0039	0.0012	0	0	0	0.343	0.1756	0.0217	0.0011	0	0	0	0	0	0.3314	0.1741	0.0253	0.0076	0.002	0.0038	0	0	0
177	0.3531	0.1928	0.0247	0.005	0.0045	0.0017	0	0	0	0.3478	0.1852	0.0251	0.0019	0	0.0002	0	0	0	0.3363	0.1837	0.0285	0.0083	0.0028	0.0042	0	0	0
180	0.3573	0.2022	0.0277	0.005	0.0039	0.0014	0	0	0	0.3522	0.1947	0.0279	0.0018	0	0	0	0	0	0.3409	0.1926	0.0309	0.0085	0.0026	0.0038	0	0	0
183	0.3622	0.2119	0.0312	0.0054	0.0039	0.0003	0	0	0	0.3565	0.2039	0.0313	0.0028	0	0	0	0	0	0.345	0.2018	0.0342	0.0099	0.0033	0.0008	0	0	0
186	0.3668	0.2213	0.0352	0.006	0.0042	0.0016	0	0	0	0.3608	0.2136	0.0351	0.0026	0	0.0001	0	0	0	0.3501	0.2118	0.0381	0.0091	0.0028	0.0043	0	0	0
189	0.369	0.2283	0.0378	0.0059	0.0039	0.0014	0	0	0	0.3634	0.2201	0.0376	0.0025	0	0	0	0	0	0.3525	0.218	0.0406	0.009	0.0026	0.0041	0	0	0
192	0.3739	0.2397	0.043	0.0067	0.0046	0.0018	0	0	0	0.3682	0.2316	0.0449	0.0033	0	0.0002	0	0	0	0.3569	0.229	0.0497	0.0097	0.003	0.0042	0	0	0
195	0.378	0.2511	0.0485	0.0072	0.0046	0.0019	0	0	0	0.3719	0.2427	0.0482	0.0039	0	0.0003	0	0	0	0.3611	0.2406	0.0502	0.0103	0.003	0.0045	0	0	0
198	0.3818	0.2639	0.0536	0.0077	0.0029	0.0011	0	0	0	0.3756	0.2551	0.0534	0.0044	0	0	0	0	0	0.3649	0.2525	0.0555	0.0119	0.0002	0.0011	0	0	0
201	0.3858	0.2739	0.0604	0.0082	0.0046	0.0015	0	0	0	0.3796	0.2649	0.0621	0.0045	0	0	0	0	0	0.3692	0.2621	0.0663	0.011	0.0029	0.0042	0	0	0
204	0.3899	0.2834	0.0678	0.0091	0.0046	0.0017	0	0	0	0.3838	0.274	0.0696	0.0056	0	0.0002	0	0	0	0.3732	0.2715	0.0735	0.0117	0.0032	0.0044	0	0	0
207	0.3945	0.2931	0.0765	0.0101	0.0045	0.0018	0	0	0	0.3876	0.2826	0.0781	0.0063	0	0.0003	0	0	0	0.3771	0.2786	0.0816	0.0126	0.0033	0.0048	0	0	0
210	0.3976	0.3006	0.0851	0.0107	0.0043	0.0014	0	0	0	0.3907	0.2916	0.0866	0.0065	0	0	0	0	0	0.3802	0.2888	0.0898	0.0125	0.0029	0.0045	0	0	0
213	0.4015	0.3129	0.0957	0.0116	0.0035	0.0018	0	0	0	0.3948	0.3029	0.0949	0.0082	0	0.0011	0.0002	0	0	0.3842	0.2983	0.0953	0.015	0.0012	0.0054	0.0001	0	0
216	0.4054	0.3259	0.1065	0.0128	0.0043	0.0013	0	0	0	0.3984	0.3168	0.1084	0.0086	0	0.0001	0.0013	0	0	0.3875	0.3129	0.1101	0.0146	0.0034	0.0045	0.0028	0	0
219	0.4078	0.3307	0.1147	0.0141	0.0048	0.0016	0	0	0	0.4009	0.3208	0.1162	0.0098	0	0.0003	0.0015	0	0	0.3904	0.3174	0.118	0.0157	0.0036	0.0046	0.0028	0	0
222	0.4113	0.3352	0.1261	0.0151	0.0043	0.0012	0	0	0	0.4045	0.3239	0.1274	0.0108	0	0	0.0006	0	0	0.3935	0.3193	0.1286	0.0164	0.0031	0.0043	0.0023	0	0
225	0.4155	0.3403	0.1346	0.0172	0.0048	0.0017	0	0	0	0.4086	0.3294	0.1365	0.0126	0	0.0006	0.0013	0	0	0.3979	0.3247	0.1369	0.0182	0.0039	0.005	0.0028	0	0
228	0.4186	0.3452	0.1417	0.0186	0.0047	0.0015	0	0	0	0.4115	0.3338	0.1434	0.014	0	0.0001	0.0007	0	0	0.4007	0.3292	0.1429	0.0194	0.0036	0.0044	0.002	0	0
231	0.4226	0.3505	0.1514	0.0206	0.0049	0.0016	0	0	0	0.4154	0.3389	0.153	0.0158	0	0.0003	0.0008	0	0	0.4044	0.3341	0.1525	0.0211	0.0042	0.0047	0.0021	0	0
234	0.4269	0.3551	0.1626	0.0236	0.006	0.0021	0	0	0	0.4196	0.3441	0.164	0.0186	0.0007	0.0009	0.0009	0	0	0.4087	0.3394	0.1633	0.0235	0.0048	0.0053	0.0021	0	0
237	0.4302	0.3589	0.1736	0.026	0.0058	0.002	0	0	0	0.4228	0.3485	0.1751	0.0209	0.0009	0.0008	0.0011	0	0	0.4116	0.3435	0.1742	0.0256	0.0048	0.0052	0.0023	0	0
240	0.4336	0.3633	0.1834	0.0285	0.0072	0.0017	0	0	0	0.4261	0.3525	0.185	0.0231	0.0007	0.0004	0.0004	0	0	0.4153	0.3474	0.1832	0.0275	0.0027	0.0048	0.0016	0	0
243	0.4371	0.3675	0.1926	0.0322	0.0058	0.0017	0	0	0	0.4296	0.357	0.1939	0.026	0.001	0.0005	0.0004	0	0	0.4182	0.3517	0.1919	0.0303	0.005	0.0049	0.0017	0	0
246	0.4407	0.3723	0.202	0.0355	0.0062	0.0016	0	0	0	0.4331	0.3617	0.2043	0.0303	0.0017	0	0	0	0	0.4215	0.3562	0.2019	0.0349	0.0065	0.002	0	0	0
249	0.4435	0.3763	0.2111	0.0397	0.0066	0.0018	0	0	0	0.4363	0.3651	0.2127	0.0328	0.0015	0.0006	0.0001	0	0	0.4242	0.3601	0.2099	0.0365	0.0054	0.005	0.001	0	0
252	0.4452	0.3784	0.2181	0.0424	0.0067	0.0015	0	0	0	0.4381	0.3679	0.2194	0.0358	0.0015	0.0005	0.0003	0	0.0001	0.4254	0.3626	0.2161	0.0391	0.0056	0.0049	0.001	0	0
255	0.448	0.3822	0.2281	0.0473	0.0066	0.0021	0	0	0	0.4412	0.3719	0.2279	0.0405	0.0016	0.0018	0	0	0	0.4281	0.3664	0.2231	0.0443	0.0045	0.0061	0	0	0
258	0.451	0.3865	0.2388	0.0531	0.0096	0.0018	0	0	0	0.4444	0.3757	0.2411	0.0452	0.0027	0.0006	0	0	0.0005	0.4309	0.3704	0.2372	0.0481	0.0048	0.0051	0.0009	0	0
261	0.4537	0.3909	0.2507	0.0596	0.0101	0.002	0	0	0	0.4468	0.3796	0.2526	0.051	0.0033	0.0007	0.0002	0	0	0.4336	0.3742	0.2488	0.0535	0.0054	0.0052	0.0007	0	0
264	0.4567	0.3945	0.2634	0.0662	0.0107	0.0019	0	0	0	0.4494	0.3836	0.2635	0.0571	0.004	0.0008	0.0001	0	0.0001	0.4363	0.378	0.2577	0.0596	0.006	0.0054	0.0007	0	0
267	0.4595	0.398	0.2728	0.0741	0.009	0.0018	0	0	0	0.4523	0.3876	0.2729	0.0645	0.004	0	0	0	0	0.4387	0.3817	0.2666	0.0674	0.007	0.0027	0	0	0
270	0.4625	0.4025	0.2822	0.0831	0.0127	0.0026	0	0	0	0.4556	0.3918	0.2841	0.0726	0.0059	0.0013	0.0004	0	0.0012	0.4424	0.3861	0.2794	0.0741	0.0077	0.0059	0.0009	0	0
273	0.4651	0.4058	0.2909	0.0925	0.0135	0.0025	0	0	0	0.4581	0.3954	0.2931	0.0814	0.0066	0.0012	0.0003	0	0.0006	0.4446	0.3894	0.2881	0.0827	0.0085	0.0059	0.0007	0	0
276	0.4674	0.4091	0.2992	0.1026	0.0144	0.0023	0	0	0	0.4603	0.3991	0.2992	0.0912	0.0072	0.0013	0	0	0.0005	0.4463	0.3931	0.2926	0.092	0.0091	0.0057	0.0007	0	0
279	0.471	0.414	0.3115	0.1151	0.0167	0.0037	0	0	0	0.4639	0.4037	0.3122	0.103	0.0097	0.0026	0.0011	0.0002	0.0015	0.4501	0.3973	0.3052	0.1039	0.0114	0.0072	0.0016	0	0
282	0.4722	0.4156	0.3205	0.1221	0.0168	0.0029	0	0	0	0.4649	0.4053	0.3216	0.1097	0.0098	0.002	0.0001	0	0.0004	0.451	0.3988	0.3139	0.1103	0.0115	0.0064	0.0007	0	0
285	0.4741	0.4191	0.329	0.1341	0.0181	0.0025	0	0	0	0.4667	0.4088	0.3295	0.1221	0.0118	0.0004	0	0	0	0.4532	0.4022	0.321	0.1229	0.0172	0.003	0	0	0
288	0.4768	0.4223	0.3337	0.1403	0.0195	0.0029	0	0	0	0.4691	0.4122	0.3338	0.1302	0.0123	0.0018	0	0	0	0.4554	0.4058	0.325	0.1325	0.0139	0.0065	0.0003	0	0
291	0.4796	0.4264	0.3383	0.1487	0.0207	0.0031	0	0	0	0.4721	0.416	0.3388	0.1377	0.0145	0.001	0	0	0	0.4583	0.4095	0.3304	0.14	0.0187	0.004	0	0	0
294	0.4823	0.4299	0.3432	0.1579	0.0235	0.0034	0	0	0	0.4744	0.4194	0.3439	0.1461	0.0162	0.0022	0	0	0.0004	0.4603	0.4127	0.3349	0.1477	0.0177	0.0069	0.0002	0	0
297	0.4846	0.4333	0.3478	0.1696	0.0261	0.0035	0	0	0	0.477	0.4232	0.3485	0.1565	0.0182	0.0028	0	0	0.0004	0.4626	0.416	0.3393	0.1573	0.0198	0.0072	0.0002	0	0
300	0.4871	0.4367	0.3517	0.1802	0.0284	0.0038	0	0	0	0.4797	0.4259	0.3531	0.1676	0.0209	0.0028	0	0	0.0004	0.4646	0.419	0.3436	0.1684	0.022	0.0072	0.0005	0	0
303	0.4905	0.4405	0.3565	0.1908	0.0311	0.0041	0	0	0	0.483	0.4301	0.3577	0.1793	0.0245	0.002	0.0006	0	0	0.4676	0.4229	0.3487	0.1804	0.0282	0.0046	0.0012	0	0
306	0.4933	0.4433	0.3607	0.1996	0.0348	0.0044	0	0	0	0.486	0.4329	0.362	0.1877	0.0267	0.0034	0	0	0.0005	0.4697	0.426	0.3525	0.1891	0.0278	0.0079	0.0002	0	0
309	0.4965	0.4465	0.3651	0.2093	0.0383	0.0048	0	0	0	0.4887	0.4364	0.3663	0.1972	0.0303	0.0038	0	0	0	0.4721	0.4292	0.3567	0.1976	0.0311	0.0083	0	0	0
312	0.4997	0.45	0.3677	0.2156	0.041	0.0051	0	0	0	0.4915	0.4396	0.3693	0.2033	0.0328	0.004	0	0	0.0003	0.475	0.4325	0.3596	0.2041	0.0333	0.0084	0.0004	0	0
315	0.5016	0.4524	0.3724	0.2256	0.0459	0.0057	0	0	0	0.4933	0.442	0.3739	0.2137	0.0375	0.0048	0.0001	0	0.0006	0.4772	0.4346	0.3638	0.2136	0.0377	0.0093	0.0005	0	0
318	0.5047	0.456	0.3765	0.236	0.0492	0.0062	0	0	0	0.4963	0.4452	0.3781	0.2234	0.0422	0.0053	0.0004	0	0.0006	0.4799	0.4376	0.3681	0.2237	0.0446	0.0096	0.0007	0	0
321	0.5072	0.4587	0.3801	0.2469	0.0565	0.0069	0	0	0	0.4982	0.4477	0.382	0.234	0.0473	0.0059	0	0	0.0003	0.4825	0.4407	0.3721	0.2339	0.0472	0.0102	0.0005	0	0
324	0.5103	0.4624	0.3849	0.2595	0.0633	0.0081	0	0	0	0.5014	0.4515	0.3869	0.2462	0.054	0.0071	0.0011	0	0.0011	0.4858	0.4437	0.3778	0.2451	0.0536	0.0112	0.0015	0	0
327	0.5121	0.4644	0.3877	0.271	0.0687	0.0082	0	0	0	0.5026	0.4532	0.3899	0.2578	0.0604	0.0073	0.0003	0	0	0.4878	0.4461	0.38	0.2571	0.0615	0.0115	0.0008	0	0
330	0.514	0.4672	0.3914	0.2798	0.0796	0.0085	0.0003	0	0	0.5051	0.4561	0.3944	0.2681	0.0686	0.0067	0.0005	0	0	0.4898	0.4486	0.3844	0.2684	0.0688	0.0083	0.0003	0	0
333	0.517	0.4708	0.3957	0.2892	0.0862	0.0102	0	0	0	0.5075	0.4593	0.3983	0.2768	0.077	0.0094	0.0007	0	0.0005	0.4923	0.452	0.3883	0.2771	0.0771	0.0129	0.0012	0	0
336	0.5191	0.4731	0.3993	0.2982	0.0959	0.0111	0	0	0	0.5093	0.4619	0.4015	0.2858	0.0858	0.01	0.0004	0	0	0.494	0.4541	0.3916	0.2858	0.0856	0.0134	0.001	0	0
339	0.5218	0.4764	0.4035	0.3074	0.1077	0.0127	0.0001	0	0	0.5116	0.4647	0.4062	0.295	0.0965	0.0119	0.001	0	0.0001	0.4961	0.457	0.3959	0.2955	0.0964	0.015	0.0017	0	0
342	0.5228	0.4789	0.4065	0.319	0.1184	0.0134	0	0	0	0.5128	0.4664	0.4087	0.305	0.1072	0.0124	0.0003	0	0.0002	0.4977	0.4587	0.3986	0.3035	0.1061	0.0152	0.001	0	0
345	0.5243	0.4803	0.4092	0.3282	0.1271	0.014	0.0014	0	0	0.5145	0.4681	0.4102	0.3147	0.1154	0.0123	0.0017	0.0009	0	0.4988	0.4604	0.3992	0.3126	0.1162	0.0127	0.0027	0	0
348	0.527	0.4832	0.4132	0.3363	0.1393	0.0164	0	0	0	0.5175	0.4707	0.4138	0.3255	0.1276	0.0155	0.0009	0	0.0002	0.5031	0.4627	0.4016	0.3253	0.1265	0.0176	0.0016	0	0
351	0.5286	0.4855	0.4165	0.3408	0.147	0.0176	0.0011	0	0	0.5198	0.4729	0.4178	0.3307	0.1357	0.0159	0.002	0.0013	0	0.5051	0.4652	0.4056	0.3312	0.1366	0.0153	0.0036	0	0
354	0.5314	0.4887	0.4198	0.3453	0.1549	0.0198	0	0	0	0.5218	0.4757	0.4212	0.3349	0.143	0.0194	0.0011	0.0002	0.0003	0.5075	0.4675	0.409	0.3351	0.1417	0.0205	0.002	0	0
357	0.5334	0.4913	0.4237	0.35	0.1647	0.0219	0	0	0	0.5236	0.478	0.425	0.3394	0.1526	0.0213	0.0008	0	0	0.5094	0.4698	0.4122	0.3394	0.1503	0.0219	0.0019	0	0
360	0.5357	0.4947	0.4274	0.3554	0.1774	0.025	0.0004	0	0	0.5263	0.4815	0.4286	0.3449	0.1645	0.022	0.0014	0.0004	0	0.5116	0.4727	0.4164	0.3449	0.1616	0.0201	0.0022	0	0
363	0.5376	0.4971	0.4302	0.359	0.1875	0.0273	0	0	0	0.5278	0.4838	0.4317	0.3488	0.1751	0.0245	0.0013	0	0	0.5134	0.4748	0.4191	0.3485	0.1717	0.0215	0.0019	0	0
366	0.5397	0.5007	0.4343	0.3635	0.1974	0.0306	0.0002	0	0	0.53	0.4874	0.4355	0.3534	0.186	0.0277	0.0016	0	0.0005	0.5154	0.478	0.4226	0.3532	0.1828	0.0242	0.0026	0	0
369	0.5421	0.5042	0.4377	0.3683	0.2071	0.0341	0.0004	0	0	0.5319	0.4907	0.4387	0.3579	0.1956	0.0314	0.0018	0.0002	0.0002	0.5171	0.4811	0.4261	0.3576	0.1924	0.0274	0.0027	0	0
372	0.5441	0.507	0.4412	0.3722	0.2175	0.0377	0.0013	0	0	0.5342	0.4937	0.4427	0.3626	0.2057	0.0362	0.0026	0.0011	0	0.519	0.4844	0.4299	0.3627	0.2031	0.0314	0.0044	0	0
375	0.5454	0.5088	0.4431	0.3752	0.2231	0.0408	0.0005	0	0	0.5348	0.4951	0.4444	0.3646	0.2119	0.038	0.0018	0	0.0001	0.5199	0.4857	0.4312	0.3641	0.2076	0.0324	0.0028	0	0
378	0.5476	0.5118	0.4467	0.3793	0.2328	0.0455	0.001	0	0	0.5374	0.4979	0.4483	0.3693	0.2216	0.043	0.0023	0.0003	0.0004	0.5228	0.4889	0.4348	0.3689	0.2168	0.0365	0.0035	0	0
381	0.5494	0.5139	0.4495	0.3833	0.243	0.0508	0.0007	0	0	0.539	0.4999	0.4511	0.3732	0.2317	0.048	0.0024	0	0.0001	0.5243	0.4912	0.4378	0.3726	0.2268	0.0401	0.0035	0	0
384	0.5515	0.5163	0.4525	0.3869	0.2555	0.0566	0.001	0	0	0.5412	0.5024	0.4546	0.3777	0.2438	0.0552	0.0029	0.0009	0	0.526	0.4934	0.4414	0.3771	0.2395	0.0463	0.0047	0	0
387	0.5541	0.5189	0.4559	0.3917	0.2663	0.0638	0.0015	0	0	0.5432	0.5046	0.4573	0.3815	0.2571	0.0614	0.0031	0.0001	0.0004	0.5282	0.4956	0.444	0.3803	0.2533	0.0512	0.0044	0	0
390	0.5563	0.5214	0.4587	0.395	0.2794	0.0707	0.003	0	0	0.5453	0.507	0.4606	0.3856	0.2678	0.0694	0.0046	0.0009	0	0.5306	0.4982	0.4472	0.385	0.2633	0.0576	0.0072	0	0
393	0.5588	0.5241	0.4623	0.3997	0.2871	0.0799	0.0023	0	0	0.548	0.5096	0.4637	0.3896	0.2776	0.0774	0.0039	0.0003	0.0007	0.5325	0.5009	0.4504	0.3886	0.2746	0.0638	0.0054	0	0
396	0.5611	0.5264	0.4647	0.4033	0.2976	0.0893	0.002	0	0	0.5499	0.5123	0.4669	0.3937	0.2862	0.0879	0.004	0.0012	0	0.5347	0.5031	0.4539	0.3933	0.2819	0.0724	0.0049	0	0
399	0.5632	0.5288	0.4677	0.4069	0.3047	0.0995	0.0028	0	0	0.5518	0.5145	0.4693	0.3968	0.296	0.0974	0.0047	0.0003	0.0007	0.5361	0.505	0.4557	0.3959	0.2925	0.0796	0.0064	0	0
402	0.5654	0.5308	0.4701	0.411	0.3134	0.111	0.0036	0	0	0.5538	0.5161	0.4722	0.4004	0.3045	0.1082	0.0023	0.0002	0.0003	0.5382	0.507	0.4586	0.3993	0.3008	0.0891	0.0019	0	0
405	0.5679	0.5332	0.4733	0.4143	0.328	0.1182	0.0036	0	0	0.5564	0.5185	0.4752	0.4045	0.3168	0.1156	0.0023	0	0.0003	0.5399	0.5091	0.4617	0.4039	0.31	0.0954	0.002	0	0
408	0.5697	0.5348	0.4749	0.4169	0.3358	0.1308	0.0043	0	0	0.558	0.5198	0.4768	0.4069	0.3267	0.1284	0.0032	0.0001	0.0004	0.5411	0.5105	0.4629	0.4052	0.3215	0.1066	0.0031	0	0
411	0.5733	0.5371	0.4784	0.4204	0.3418	0.1415	0.0052	0	0	0.5613	0.5226	0.4801	0.4104	0.3328	0.1362	0.0042	0.0001	0.0006	0.5438	0.5127	0.4661	0.4091	0.3303	0.1177	0.0042	0	0
414	0.5758	0.5391	0.4811	0.4242	0.3474	0.1485	0.0058	0	0	0.5637	0.5243	0.4827	0.414	0.3383	0.1438	0.0047	0.0001	0.0002	0.545	0.5147	0.4686	0.4128	0.3352	0.13	0.0051	0	0
417	0.5779	0.5414	0.4837	0.4277	0.3512	0.1578	0.0066	0	0	0.5657	0.5265	0.4854	0.4176	0.3423	0.1532	0.0055	0	0.0004	0.5471	0.5167	0.4709	0.4161	0.3391	0.1373	0.006	0	0
420	0.5804	0.5442	0.4872	0.4314	0.3565	0.1686	0.0076	0	0	0.568	0.5292	0.4883	0.4214	0.3477	0.1644	0.0067	0.0001	0.0008	0.5498	0.519	0.4737	0.4196	0.3443	0.1446	0.0077	0	0
423	0.5823	0.5459	0.4898	0.4347	0.3609	0.1803	0.0084	0	0	0.5697	0.5311	0.4911	0.4249	0.352	0.1756	0.0075	0	0.0003	0.5524	0.5209	0.4758	0.4233	0.3488	0.1538	0.0088	0	0
426	0.5846	0.5488	0.4941	0.4393	0.366	0.1917	0.0102	0	0	0.5722	0.5339	0.4953	0.429	0.3571	0.1875	0.0093	0.0003	0.0012	0.555	0.5236	0.4796	0.4274	0.3539	0.1652	0.011	0	0
429	0.5864	0.5505	0.4967	0.4424	0.3698	0.2015	0.0114	0	0	0.5733	0.5352	0.4982	0.4325	0.361	0.1964	0.0103	0	0.0009	0.5566	0.5251	0.4821	0.4309	0.3575	0.1762	0.0123	0	0
432	0.5888	0.5531	0.5013	0.446	0.3749	0.2112	0.013	0	0	0.5756	0.5381	0.5023	0.4364	0.3656	0.2065	0.0124	0.0003	0.001	0.5598	0.5276	0.4859	0.4344	0.3622	0.1871	0.0147	0	0
435	0.5905	0.5556	0.5043	0.4493	0.3786	0.2209	0.0146	0	0	0.5767	0.5401	0.5049	0.4394	0.37	0.2164	0.014	0	0.0003	0.5608	0.5295	0.4887	0.4374	0.3662	0.1957	0.0166	0	0
438	0.5921	0.5576	0.5068	0.4519	0.3816	0.2274	0.0163	0	0	0.5789	0.5424	0.5075	0.4419	0.3728	0.2227	0.0157	0.0004	0.0013	0.5637	0.5319	0.4914	0.4405	0.3692	0.2024	0.0186	0	0
441	0.5943	0.5597	0.5094	0.455	0.3859	0.2377	0.0179	0	0	0.5803	0.544	0.5097	0.4454	0.377	0.2334	0.0174	0.0001	0.0007	0.5644	0.5332	0.494	0.4431	0.3731	0.2116	0.0208	0	0
444	0.5956	0.5613	0.5114	0.4584	0.3899	0.2482	0.0201	0	0	0.582	0.5457	0.5126	0.4489	0.3808	0.2439	0.02	0	0.0007	0.5661	0.5351	0.4962	0.4464	0.3771	0.2214	0.024	0	0
447	0.5972	0.5633	0.5144	0.4617	0.3941	0.2601	0.0227	0	0	0.5835	0.5491	0.5148	0.4519	0.3849	0.256	0.0228	0.0004	0.0011	0.5675	0.5392	0.4985	0.4496	0.3809	0.231	0.0277	0	0
450	0.5996	0.5665	0.5173	0.4649	0.3979	0.2733	0.0257	0	0	0.5857	0.5506	0.5176	0.4549	0.3891	0.2686	0.026	0.0002	0.0003	0.5696	0.5396	0.5014	0.4526	0.3852	0.2425	0.0313	0	0
453	0.6015	0.5682	0.5195	0.4676	0.4023	0.2841	0.0291	0	0	0.5873	0.5538	0.52	0.4581	0.3928	0.2802	0.0298	0.0003	0.0012	0.5713	0.5434	0.5038	0.4558	0.3887	0.2579	0.0358	0	0
456	0.6035	0.5711	0.5226	0.471	0.4065	0.2931	0.0329	0	0	0.5892	0.5562	0.523	0.461	0.397	0.2872	0.0337	0.0005	0.0007	0.573	0.546	0.5065	0.4587	0.3928	0.2668	0.0408	0	0
459	0.6054	0.5731	0.5249	0.4738	0.4102	0.3021	0.0368	0	0	0.591	0.5586	0.5252	0.4636	0.401	0.296	0.038	0.0004	0.0004	0.5748	0.548	0.5086	0.4614	0.3968	0.2755	0.0459	0	0
462	0.6074	0.5755	0.5274	0.4761	0.4136	0.3113	0.0412	0	0	0.5925	0.5606	0.5271	0.4664	0.4044	0.307	0.0426	0.0002	0.0008	0.5762	0.5498	0.5106	0.464	0.3999	0.2886	0.0519	0	0
465	0.6094	0.5783	0.5297	0.4793	0.4174	0.3238	0.0466	0	0	0.594	0.5627	0.5299	0.4694	0.4083	0.3196	0.0479	0.0003	0.0005	0.578	0.5516	0.513	0.4671	0.4038	0.2978	0.0585	0	0
468	0.611	0.5801	0.5313	0.4812	0.4201	0.3329	0.0497	0	0	0.5962	0.5645	0.5315	0.472	0.4106	0.3272	0.0526	0.0012	0	0.5796	0.5532	0.5152	0.4702	0.4056	0.2994	0.0641	0	0
471	0.6122	0.5832	0.5342	0.4842	0.4241	0.3432	0.0562	0	0	0.5973	0.5677	0.5342	0.4746	0.4145	0.3366	0.0585	0.0002	0.0007	0.5808	0.5554	0.517	0.4722	0.4096	0.3138	0.0713	0	0
474	0.6142	0.586	0.5361	0.4871	0.4276	0.348	0.0628	0	0	0.5985	0.5702	0.5362	0.4774	0.4179	0.3417	0.0657	0.0002	0.0007	0.582	0.5576	0.5192	0.4749	0.4126	0.3277	0.0805	0	0
477	0.6164	0.589	0.5386	0.4906	0.4316	0.353	0.0706	0	0	0.6007	0.5732	0.5387	0.4807	0.422	0.3463	0.0742	0.0006	0.001	0.5842	0.5602	0.522	0.4782	0.4172	0.3357	0.0903	0	0
480	0.6176	0.5909	0.5414	0.4931	0.435	0.3584	0.0788	0	0	0.6023	0.5752	0.5409	0.4833	0.4252	0.3513	0.0833	0.0003	0.0008	0.5851	0.563	0.5238	0.4807	0.4202	0.3405	0.101	0	0
483	0.6196	0.5934	0.5439	0.4966	0.439	0.3627	0.0886	0	0	0.6041	0.5778	0.5436	0.4871	0.4294	0.3563	0.0934	0.0005	0.0016	0.5875	0.5661	0.5262	0.4844	0.4243	0.345	0.1126	0	0
486	0.6214	0.5955	0.5459	0.4997	0.4426	0.3677	0.0987	0	0	0.6058	0.5797	0.5457	0.4904	0.4331	0.3605	0.1037	0.0005	0.0008	0.5894	0.5684	0.5287	0.4873	0.4278	0.3499	0.1248	0	0
489	0.6229	0.5973	0.5483	0.5034	0.4463	0.3719	0.1099	0	0	0.6072	0.5816	0.5481	0.4945	0.4365	0.365	0.1152	0.0003	0.0012	0.5906	0.5703	0.5309	0.4911	0.4312	0.3541	0.1325	0	0
492	0.6251	0.5995	0.5506	0.5073	0.45	0.3768	0.1214	0	0	0.6091	0.584	0.5504	0.4982	0.4402	0.3696	0.1282	0.0006	0.0014	0.5925	0.5724	0.533	0.4951	0.4345	0.3588	0.14	0	0
495	0.6271	0.602	0.5534	0.5111	0.4551	0.3806	0.1346	0	0	0.6108	0.586	0.5531	0.5022	0.4449	0.3722	0.1365	0.0013	0	0.5942	0.5747	0.5358	0.4995	0.4399	0.3597	0.1507	0	0
498	0.6287	0.6038	0.556	0.5141	0.4577	0.3863	0.141	0	0	0.6126	0.5879	0.5552	0.5044	0.4476	0.3782	0.1432	0.0005	0.0013	0.5959	0.5759	0.5374	0.5021	0.4418	0.3673	0.16	0	0
501	0.6297	0.6048	0.5569	0.5158	0.4595	0.3884	0.1457	0	0	0.6137	0.5885	0.5565	0.506	0.4496	0.3806	0.1491	0.0004	0.001	0.5966	0.5773	0.5388	0.5035	0.4437	0.3699	0.167	0	0
504	0.6317	0.6068	0.5596	0.5189	0.4627	0.3933	0.1559	0	0	0.6152	0.5906	0.559	0.5091	0.4529	0.3846	0.1605	0.0013	0	0.5979	0.5793	0.5413	0.5072	0.4466	0.3727	0.1788	0	0
507	0.6337	0.6093	0.562	0.5214	0.4658	0.3972	0.1658	0	0	0.6157	0.5929	0.5614	0.511	0.4561	0.3887	0.1715	0.0007	0.001	0.5968	0.5817	0.5436	0.5092	0.4502	0.3783	0.1888	0	0
510	0.6364	0.6113	0.5642	0.5243	0.469	0.4012	0.1773	0	0	0.6181	0.5947	0.5634	0.5137	0.4593	0.3925	0.1826	0.0003	0.0008	0.5988	0.5831	0.5454	0.5115	0.453	0.3823	0.1974	0	0
513	0.6392	0.613	0.5667	0.527	0.4721	0.4051	0.1894	0	0	0.6224	0.5964	0.566	0.5173	0.462	0.3956	0.1932	0.0014	0	0.6028	0.5847	0.5482	0.5151	0.4541	0.3835	0.2072	0	0
516	0.6426	0.6149	0.569	0.529	0.4748	0.4095	0.1987	0	0	0.6254	0.5984	0.568	0.5189	0.4651	0.4004	0.202	0.0003	0.0015	0.6019	0.5867	0.55	0.5166	0.459	0.3899	0.2168	0	0
519	0.6497	0.6176	0.5721	0.5323	0.4786	0.4144	0.2086	0	0	0.6314	0.6009	0.5713	0.5224	0.4688	0.405	0.2132	0.0012	0.0016	0.6052	0.5895	0.5531	0.5201	0.4628	0.3945	0.2284	0	0
522	0.6532	0.6189	0.5741	0.5347	0.4809	0.4178	0.2178	0	0	0.635	0.6023	0.5731	0.5245	0.4712	0.4084	0.2223	0.0002	0.0014	0.6083	0.5907	0.5546	0.522	0.4651	0.3981	0.2384	0	0
525	0.6563	0.6216	0.5767	0.537	0.4833	0.4215	0.2291	0.0001	0.0001	0.6378	0.6039	0.5754	0.5276	0.4734	0.4107	0.2345	0.0012	0	0.6132	0.5924	0.5572	0.5254	0.4661	0.3987	0.2525	0.0001	0.0001
528	0.6594	0.623	0.58	0.5396	0.4869	0.4265	0.2377	0	0	0.6405	0.6062	0.578	0.5294	0.4774	0.4162	0.2443	0.0002	0.0013	0.6186	0.5941	0.5591	0.527	0.4712	0.4055	0.2633	0	0
531	0.6604	0.6243	0.5816	0.5408	0.4882	0.4284	0.2443	0	0	0.6414	0.6065	0.5796	0.5309	0.4788	0.4184	0.2517	0	0.0011	0.6203	0.5948	0.5599	0.5284	0.4726	0.4075	0.2698	0	0
534	0.6625	0.6261	0.585	0.5436	0.4912	0.4317	0.255	0	0	0.6437	0.6084	0.5823	0.5339	0.4817	0.4208	0.2638	0.0005	0	0.6228	0.5967	0.5625	0.5318	0.4753	0.408	0.2791	0	0
537	0.6645	0.6281	0.5875	0.5457	0.4943	0.4366	0.2665	0	0	0.6454	0.6098	0.5855	0.5353	0.4849	0.4254	0.2728	0	0.0006	0.6249	0.5979	0.5643	0.533	0.4786	0.4144	0.2877	0	0
540	0.6661	0.6305	0.5898	0.5484	0.4976	0.4402	0.2776	0	0	0.6472	0.6119	0.5888	0.5379	0.4882	0.4293	0.2825	0	0.0002	0.6271	0.5998	0.5677	0.5356	0.482	0.4181	0.2964	0	0
543	0.6677	0.6324	0.5926	0.5508	0.5012	0.444	0.2863	0	0	0.6493	0.614	0.5913	0.5407	0.4917	0.4333	0.292	0	0	0.6283	0.6017	0.5711	0.5382	0.4851	0.4218	0.3068	0	0
546	0.6693	0.6345	0.5951	0.5534	0.505	0.4482	0.295	0	0	0.6506	0.616	0.5937	0.5432	0.4955	0.4366	0.2996	0	0	0.6302	0.6033	0.5737	0.5408	0.4886	0.4255	0.3212	0	0
549	0.6715	0.6374	0.598	0.5569	0.509	0.4516	0.3044	0	0	0.6526	0.6184	0.5969	0.5469	0.4994	0.4395	0.3128	0	0	0.6319	0.6061	0.5774	0.5448	0.4909	0.4266	0.3313	0	0
552	0.6727	0.6392	0.6	0.5585	0.5134	0.4561	0.314	0	0	0.6539	0.6202	0.5987	0.5484	0.5037	0.4443	0.3264	0	0	0.6337	0.6075	0.579	0.5461	0.4968	0.433	0.3348	0	0
555	0.6738	0.6411	0.6021	0.561	0.5166	0.4594	0.3278	0	0	0.6554	0.6217	0.6004	0.5506	0.5068	0.4477	0.3337	0	0	0.6346	0.6092	0.5812	0.5484	0.5001	0.4362	0.3393	0	0
558	0.6749	0.6432	0.6039	0.5633	0.5196	0.4627	0.3373	0.0001	0.0001	0.6564	0.6238	0.6028	0.553	0.5099	0.4511	0.3383	0	0	0.635	0.6111	0.5831	0.5507	0.5031	0.44	0.3447	0.0001	0.0001
561	0.6761	0.6453	0.6059	0.5657	0.5219	0.4653	0.3412	0	0	0.6576	0.6257	0.6047	0.5564	0.5117	0.4533	0.3424	0	0	0.6363	0.6132	0.5855	0.5539	0.5039	0.4425	0.3484	0	0
564	0.6772	0.6471	0.6079	0.5681	0.5243	0.4683	0.346	0	0	0.6589	0.6277	0.6066	0.5582	0.5141	0.4553	0.3477	0	0	0.6367	0.6148	0.5879	0.5562	0.5061	0.4433	0.3534	0	0
567	0.6784	0.6493	0.61	0.5701	0.5282	0.4722	0.351	0	0	0.66	0.6305	0.6086	0.56	0.5179	0.46	0.3522	0	0	0.6381	0.6171	0.5899	0.5576	0.5112	0.4496	0.3577	0	0
570	0.6796	0.6531	0.6122	0.5725	0.5311	0.4754	0.3563	0	0	0.6609	0.6345	0.6105	0.5622	0.5208	0.4634	0.3577	0	0	0.6386	0.6196	0.5914	0.5598	0.5137	0.4531	0.3622	0	0
573	0.6802	0.6582	0.6137	0.5748	0.5334	0.4783	0.3603	0	0.0001	0.6619	0.64	0.6122	0.5642	0.5228	0.4659	0.3613	0	0	0.6398	0.6235	0.593	0.5616	0.5158	0.4558	0.3662	0	0.0001
576	0.682	0.6642	0.6174	0.5778	0.537	0.482	0.3653	0	0	0.6636	0.6453	0.617	0.5674	0.5262	0.4697	0.367	0	0	0.6415	0.6305	0.5988	0.5648	0.5195	0.4597	0.3714	0	0
579	0.6826	0.6676	0.6188	0.5806	0.5385	0.4838	0.3686	0	0	0.6643	0.6483	0.6169	0.5708	0.5271	0.4706	0.3701	0	0	0.6416	0.6347	0.5975	0.5688	0.5191	0.4594	0.3736	0	0
582	0.6847	0.6716	0.6221	0.5835	0.5427	0.4887	0.3747	0	0	0.6664	0.6518	0.6216	0.5731	0.5318	0.4759	0.3766	0.0004	0	0.6437	0.639	0.6034	0.5707	0.5247	0.466	0.3802	0	0
585	0.685	0.673	0.623	0.5854	0.5451	0.4908	0.3785	0	0	0.6665	0.6533	0.6229	0.5751	0.5342	0.4781	0.3807	0	0	0.6439	0.6407	0.6047	0.5721	0.5269	0.4681	0.384	0	0
588	0.6864	0.6756	0.6254	0.589	0.5482	0.4944	0.3834	0	0	0.6678	0.6552	0.625	0.5782	0.5369	0.4813	0.385	0	0	0.6453	0.6435	0.6069	0.5747	0.5298	0.4711	0.3883	0	0
591	0.6881	0.6779	0.6279	0.5928	0.5503	0.4968	0.3887	0	0	0.6693	0.6577	0.6276	0.5825	0.5392	0.483	0.3908	0.0004	0	0.6467	0.6458	0.6097	0.579	0.5317	0.4719	0.3937	0	0
594	0.6876	0.678	0.6284	0.5942	0.5522	0.4997	0.3899	0.0001	0.0001	0.6691	0.658	0.6279	0.5831	0.541	0.4861	0.3917	0	0	0.6462	0.6462	0.6098	0.5791	0.534	0.4757	0.3945	0.0001	0.0001
597	0.6893	0.6806	0.6314	0.5977	0.5555	0.5046	0.3953	0	0	0.6707	0.66	0.6304	0.587	0.5442	0.4902	0.3966	0.0005	0	0.648	0.6487	0.6126	0.5833	0.5372	0.4794	0.3993	0	0.0001
600	0.6911	0.6821	0.6338	0.6004	0.5574	0.5085	0.3987	0	0	0.6721	0.6618	0.633	0.5899	0.5456	0.4925	0.4001	0.0018	0	0.6489	0.6504	0.6155	0.5865	0.5373	0.4803	0.4024	0	0
603	0.6916	0.6834	0.6353	0.6026	0.5607	0.5133	0.4034	0	0	0.6734	0.663	0.6347	0.5921	0.5493	0.4973	0.4049	0.0006	0	0.6499	0.6515	0.6164	0.589	0.5422	0.4857	0.4066	0	0
606	0.6932	0.6852	0.6381	0.6057	0.564	0.5176	0.4082	0	0	0.6748	0.6653	0.6374	0.5955	0.5525	0.5023	0.4097	0.0013	0.0009	0.6513	0.6537	0.6193	0.5924	0.5458	0.4895	0.4111	0	0
609	0.6946	0.6869	0.6404	0.6085	0.5671	0.5216	0.4128	0	0	0.6764	0.6668	0.6398	0.5982	0.554	0.5067	0.4142	0.002	0.0013	0.6531	0.6552	0.6211	0.5956	0.5452	0.4931	0.4155	0	0
612	0.6956	0.6887	0.6434	0.6116	0.5693	0.5246	0.4169	0	0	0.6776	0.6686	0.6423	0.6016	0.5576	0.5098	0.4186	0.0032	0.001	0.654	0.6571	0.6238	0.5993	0.5495	0.4951	0.4202	0	0
615	0.6969	0.689	0.6448	0.6132	0.5727	0.5285	0.4216	0	0	0.6779	0.6692	0.6438	0.6028	0.5608	0.5141	0.4225	0.003	0.0019	0.6547	0.6578	0.6255	0.6001	0.5534	0.5014	0.4236	0	0
618	0.6969	0.69	0.6466	0.6149	0.5744	0.5307	0.4246	0	0	0.6783	0.6699	0.6452	0.6047	0.5612	0.5166	0.4258	0.0019	0.0013	0.6546	0.6577	0.6264	0.6018	0.5526	0.5047	0.4265	0	0
621	0.6979	0.6908	0.6487	0.6175	0.5772	0.5339	0.4288	0	0	0.6795	0.6711	0.6476	0.6069	0.5638	0.5197	0.4297	0.0021	0.0017	0.6557	0.6592	0.6287	0.6042	0.5546	0.5084	0.4304	0	0
624	0.6987	0.6922	0.6515	0.6192	0.5792	0.5363	0.4322	0	0	0.6807	0.6723	0.6519	0.6084	0.5659	0.5221	0.4326	0.0028	0.002	0.6567	0.6607	0.635	0.606	0.5573	0.5113	0.4333	0	0
627	0.6993	0.6926	0.6537	0.6213	0.5816	0.5391	0.436	0	0	0.681	0.6728	0.6545	0.611	0.5684	0.5249	0.4367	0.0026	0.0018	0.657	0.6611	0.6369	0.6082	0.5595	0.5143	0.4366	0	0
630	0.7006	0.6942	0.6578	0.6239	0.5848	0.5426	0.4405	0	0	0.6818	0.6742	0.6587	0.6137	0.5714	0.5282	0.4406	0.003	0.0023	0.6581	0.6621	0.6396	0.6109	0.5622	0.5176	0.4401	0	0
633	0.6997	0.6936	0.6606	0.6248	0.5852	0.5434	0.4442	0.0001	0.0001	0.6811	0.6738	0.6611	0.6148	0.572	0.5283	0.4442	0.0015	0.0002	0.6574	0.6622	0.6393	0.6124	0.5627	0.5166	0.4437	0.0001	0.0001
636	0.7005	0.694	0.6668	0.6264	0.5882	0.547	0.4468	0.0001	0.0001	0.6823	0.6743	0.6677	0.6163	0.5749	0.532	0.4458	0.0018	0.0012	0.6583	0.6624	0.6488	0.6132	0.5658	0.5218	0.445	0.0001	0.0001
639	0.7013	0.6952	0.6707	0.6287	0.5911	0.5498	0.4515	0.0001	0.0001	0.683	0.6754	0.6713	0.6183	0.5774	0.5349	0.4534	0.0019	0.0013	0.6593	0.6636	0.6534	0.6155	0.5682	0.5248	0.4538	0.0001	0.0001
642	0.7033	0.6971	0.6745	0.6321	0.5952	0.5534	0.4558	0	0	0.6851	0.6772	0.6752	0.6213	0.581	0.5386	0.4537	0.0029	0.0021	0.661	0.6651	0.657	0.6185	0.5718	0.5286	0.4527	0	0
645	0.7044	0.6984	0.6778	0.6346	0.5989	0.557	0.4603	0	0	0.6863	0.6786	0.6781	0.6239	0.5841	0.5418	0.461	0.0036	0.0027	0.6621	0.6664	0.6601	0.6211	0.5747	0.5317	0.4612	0	0
648	0.7047	0.6988	0.6798	0.6366	0.6025	0.56	0.4636	0	0	0.6868	0.6795	0.6803	0.6258	0.5876	0.5447	0.4638	0.0036	0.0028	0.6628	0.6674	0.6626	0.6228	0.5774	0.534	0.4637	0	0
651	0.7035	0.6981	0.6796	0.6365	0.6036	0.5602	0.4648	0.0001	0.0001	0.6854	0.6785	0.6798	0.6259	0.5889	0.5449	0.4644	0.0017	0.0007	0.6605	0.6657	0.6628	0.623	0.5777	0.535	0.4643	0.0001	0.0001
654	0.706	0.7	0.6832	0.6403	0.6084	0.5638	0.4693	0.0001	0.0001	0.6875	0.6792	0.6837	0.6302	0.5944	0.5482	0.4681	0.0039	0.0013	0.6633	0.6662	0.6672	0.6278	0.5838	0.5365	0.4671	0.0001	0.0001
657	0.7057	0.7002	0.6835	0.6406	0.6085	0.5656	0.4712	0	0	0.6873	0.6802	0.6833	0.63	0.5945	0.55	0.47	0.0025	0.0018	0.6633	0.6681	0.6655	0.6272	0.5838	0.5402	0.4697	0	0
660	0.7063	0.7002	0.6845	0.6423	0.6102	0.568	0.4746	0	0	0.6876	0.6796	0.6846	0.6317	0.5968	0.5526	0.4726	0.0023	0.0013	0.663	0.6663	0.6668	0.6289	0.5869	0.5428	0.4728	0	0
663	0.7074	0.7016	0.6866	0.6448	0.613	0.5714	0.478	0	0	0.6889	0.6808	0.6866	0.6341	0.5997	0.5557	0.4764	0.0029	0.002	0.6645	0.6675	0.6685	0.6315	0.59	0.5457	0.4762	0	0
666	0.7078	0.7022	0.6874	0.6466	0.6151	0.5736	0.4809	0	0	0.6891	0.6813	0.687	0.6359	0.601	0.5581	0.479	0.0026	0.0015	0.6649	0.6678	0.6694	0.6331	0.5922	0.5479	0.479	0	0
669	0.7085	0.7033	0.6889	0.649	0.6178	0.5766	0.4845	0	0	0.69	0.6822	0.6885	0.6382	0.604	0.5607	0.4829	0.0031	0.0054	0.6659	0.6687	0.6706	0.635	0.595	0.5507	0.4823	0	0
672	0.7091	0.7039	0.6896	0.6503	0.6194	0.5786	0.4867	0	0	0.6903	0.6826	0.6892	0.6398	0.6056	0.5626	0.486	0.0025	0.0014	0.6663	0.6689	0.6713	0.6367	0.5964	0.5527	0.4851	0	0
675	0.7093	0.7043	0.6904	0.6526	0.6218	0.5804	0.4888	0.0001	0.0001	0.6905	0.6831	0.6902	0.6424	0.6081	0.5634	0.4888	0.0029	0.0034	0.6662	0.6697	0.6728	0.6398	0.5996	0.5524	0.4879	0.0001	0.0001
678	0.7093	0.7045	0.691	0.6534	0.6227	0.5832	0.4918	0	0.0001	0.6911	0.6834	0.6905	0.6428	0.6091	0.5665	0.4936	0.0018	0.0035	0.6667	0.6697	0.6726	0.6398	0.6003	0.5565	0.4924	0	0.0001
681	0.7119	0.7068	0.6933	0.6569	0.6265	0.5877	0.4972	0.0001	0.0001	0.6929	0.6856	0.6928	0.6466	0.6131	0.5711	0.4992	0.0033	0.0049	0.6685	0.6721	0.6752	0.644	0.6041	0.561	0.498	0.0001	0.0001
684	0.7117	0.7067	0.6939	0.659	0.628	0.5896	0.4999	0.0001	0.0001	0.6928	0.6857	0.6932	0.6489	0.6148	0.5729	0.5021	0.0027	0.0044	0.6688	0.6721	0.6752	0.646	0.6055	0.563	0.5008	0.0001	0.0001
687	0.7116	0.7071	0.6941	0.66	0.6292	0.5913	0.5016	0	0	0.6926	0.6856	0.6935	0.6512	0.6157	0.5741	0.5037	0.0023	0.0036	0.6685	0.6722	0.6754	0.6483	0.6067	0.5641	0.502	0	0
690	0.7126	0.7081	0.6955	0.6636	0.6324	0.5938	0.5056	0.0001	0	0.6933	0.687	0.6952	0.6585	0.6189	0.5758	0.5071	0.003	0.0032	0.6698	0.673	0.6775	0.6555	0.6102	0.5646	0.5051	0.0001	0.0001
693	0.7119	0.7074	0.6953	0.6672	0.632	0.5973	0.5091	0	0	0.6927	0.6861	0.6944	0.6613	0.619	0.5778	0.5091	0.0014	0.0025	0.6684	0.6729	0.6763	0.659	0.6099	0.5683	0.5073	0	0.0001
696	0.7141	0.7103	0.6974	0.6746	0.6364	0.6023	0.5143	0	0	0.6952	0.6884	0.6969	0.6663	0.6229	0.5822	0.514	0.0031	0.0047	0.6712	0.6749	0.6789	0.6636	0.614	0.5725	0.5113	0	0
699	0.7146	0.7104	0.6986	0.6786	0.6384	0.6051	0.518	0	0	0.695	0.6889	0.6976	0.6689	0.6249	0.5848	0.517	0.0031	0.0038	0.6713	0.6753	0.6794	0.6664	0.6157	0.5746	0.5138	0	0
702	0.7148	0.7106	0.6985	0.6809	0.6398	0.6075	0.5206	0	0	0.6949	0.6889	0.698	0.6706	0.6264	0.5871	0.5196	0.0026	0.0041	0.6709	0.6757	0.6795	0.6682	0.6173	0.5766	0.5162	0	0
705	0.7158	0.712	0.6999	0.6834	0.6422	0.6102	0.5243	0	0	0.6958	0.6903	0.6994	0.6732	0.6289	0.5907	0.5232	0.0031	0.0042	0.6723	0.6768	0.6809	0.6706	0.6194	0.5797	0.5192	0	0
708	0.716	0.7129	0.701	0.6861	0.644	0.6132	0.5277	0	0	0.696	0.6907	0.7002	0.6752	0.6295	0.5947	0.526	0.0031	0.0044	0.6723	0.6774	0.6818	0.6727	0.6199	0.5829	0.522	0	0
711	0.7166	0.7134	0.7017	0.6881	0.6463	0.6151	0.5305	0.0001	0.0001	0.6964	0.6914	0.7009	0.6766	0.6327	0.5972	0.5286	0.0032	0.0038	0.6731	0.6781	0.6823	0.6741	0.6235	0.5847	0.5245	0.0001	0.0001
714	0.717	0.7137	0.7023	0.6898	0.6476	0.6181	0.5336	0	0	0.6966	0.6924	0.7014	0.6778	0.6334	0.5999	0.5318	0.0033	0.0042	0.6739	0.6789	0.6833	0.6755	0.6237	0.5877	0.5271	0	0
717	0.7171	0.7138	0.7017	0.6907	0.6492	0.6191	0.5355	0	0	0.696	0.6921	0.6993	0.6785	0.6358	0.6012	0.5333	0.0027	0.0034	0.6736	0.6787	0.6791	0.676	0.6266	0.5899	0.528	0	0
720	0.7179	0.7145	0.703	0.6926	0.6513	0.6224	0.539	0	0	0.6971	0.6926	0.7003	0.6801	0.6366	0.6042	0.5368	0.0033	0.0043	0.6743	0.6794	0.6797	0.6774	0.6266	0.5935	0.5314	0	0
723	0.7186	0.7156	0.7042	0.6941	0.6536	0.6247	0.5425	0	0	0.6973	0.6938	0.7018	0.6817	0.6401	0.6066	0.5399	0.0037	0.0047	0.6753	0.6808	0.6813	0.6789	0.6308	0.5966	0.5342	0	0
726	0.719	0.7162	0.7048	0.6952	0.6558	0.627	0.5453	0	0	0.6973	0.6943	0.7019	0.6826	0.6423	0.6089	0.5424	0.004	0.0046	0.6756	0.6814	0.6817	0.6799	0.6331	0.5992	0.5365	0	0
729	0.7189	0.7162	0.7046	0.6961	0.6577	0.629	0.5479	0	0	0.6971	0.6939	0.7019	0.6831	0.6439	0.6108	0.5444	0.0032	0.004	0.6749	0.6808	0.681	0.6803	0.6348	0.601	0.5386	0	0
732	0.7196	0.7169	0.7055	0.6966	0.6592	0.6313	0.5508	0	0	0.6977	0.6949	0.7029	0.684	0.6455	0.6129	0.5471	0.0033	0.0042	0.6759	0.6816	0.6821	0.6817	0.6364	0.603	0.5407	0	0
735	0.7205	0.7178	0.7069	0.6987	0.6617	0.6339	0.5543	0	0	0.6983	0.6953	0.7039	0.6857	0.6485	0.6157	0.5501	0.0034	0.0042	0.6762	0.6823	0.6828	0.6831	0.6391	0.606	0.5439	0	0
738	0.7209	0.7188	0.7077	0.6996	0.6639	0.6363	0.5574	0	0	0.6991	0.6964	0.7044	0.6863	0.6503	0.6176	0.5528	0.0037	0.0043	0.6769	0.6833	0.6832	0.6836	0.6408	0.6082	0.5459	0	0
741	0.7219	0.7194	0.7085	0.7007	0.666	0.6383	0.5601	0	0	0.6992	0.6973	0.7049	0.6872	0.6526	0.6199	0.5558	0.004	0.0043	0.6777	0.684	0.6843	0.6846	0.643	0.6107	0.549	0	0
744	0.7227	0.7204	0.7094	0.7019	0.6688	0.6412	0.5632	0	0	0.7004	0.698	0.706	0.6885	0.6557	0.6229	0.5587	0.0046	0.0049	0.6788	0.685	0.6851	0.6856	0.6457	0.6131	0.5521	0	0
747	0.7225	0.7203	0.7095	0.7022	0.6703	0.6429	0.5653	0	0	0.6998	0.698	0.7059	0.6886	0.6588	0.6243	0.5604	0.0035	0.0041	0.6786	0.6848	0.6851	0.686	0.6479	0.6148	0.5538	0	0
750	0.7232	0.7214	0.7112	0.7037	0.6744	0.644	0.5677	0	0	0.7003	0.6988	0.7077	0.6907	0.6641	0.625	0.5629	0.0043	0.0035	0.6786	0.6857	0.6864	0.6885	0.6535	0.6144	0.5561	0	0
753	0.7243	0.7223	0.7117	0.7046	0.6773	0.6474	0.5708	0.0001	0.0001	0.7014	0.7	0.708	0.6911	0.6686	0.6283	0.5654	0.0043	0.0046	0.6807	0.6868	0.6876	0.6884	0.6581	0.6192	0.5586	0.0001	0.0001
756	0.7246	0.7229	0.7125	0.706	0.6838	0.6495	0.5736	0	0	0.7017	0.6998	0.7088	0.6921	0.6729	0.631	0.5684	0.0045	0.0046	0.6797	0.6873	0.6872	0.6897	0.6633	0.6218	0.5618	0	0
759	0.7253	0.7226	0.7128	0.7063	0.6879	0.6515	0.576	0	0	0.7032	0.7002	0.7091	0.6927	0.6758	0.6327	0.5707	0.0048	0.0044	0.6828	0.6872	0.6876	0.6897	0.6661	0.6231	0.5633	0	0
762	0.7258	0.7239	0.714	0.7085	0.6917	0.6541	0.5793	0	0	0.7036	0.7009	0.7099	0.6962	0.6787	0.6354	0.5741	0.0054	0.0048	0.6831	0.6882	0.6881	0.6937	0.6692	0.626	0.5668	0	0
765	0.7249	0.7234	0.7135	0.7081	0.6932	0.6549	0.5807	0	0	0.7029	0.7004	0.7095	0.6961	0.6796	0.6367	0.5753	0.0044	0.0041	0.6825	0.6875	0.6881	0.6934	0.6705	0.6273	0.5678	0	0
768	0.7253	0.7243	0.7141	0.7083	0.695	0.6571	0.5836	0.0001	0.0001	0.7031	0.701	0.7104	0.6944	0.6815	0.6386	0.5781	0.0045	0.0038	0.683	0.6878	0.6888	0.6914	0.6725	0.6295	0.5705	0.0001	0.0001
771	0.7266	0.725	0.7154	0.7105	0.6988	0.6605	0.5873	0	0	0.7046	0.702	0.7113	0.6986	0.6846	0.6416	0.5823	0.0054	0.0048	0.6836	0.6886	0.6893	0.6956	0.6751	0.6318	0.5739	0	0
774	0.727	0.7258	0.7159	0.7115	0.7003	0.6625	0.5897	0	0	0.7047	0.7026	0.712	0.699	0.686	0.6433	0.586	0.0053	0.0048	0.6842	0.6896	0.69	0.6962	0.6765	0.6338	0.5766	0	0
777	0.7275	0.726	0.7169	0.7116	0.7019	0.6642	0.5924	0	0	0.7051	0.7028	0.7124	0.6975	0.687	0.6457	0.5891	0.0049	0.0045	0.6846	0.6898	0.6902	0.6943	0.678	0.6361	0.5797	0	0
780	0.7279	0.7268	0.7172	0.7124	0.7034	0.6663	0.5948	0	0	0.7055	0.7031	0.713	0.6986	0.6885	0.6472	0.5918	0.0053	0.0051	0.6852	0.6901	0.6912	0.6948	0.6792	0.6376	0.5825	0	0
783	0.728	0.7267	0.7173	0.7132	0.7048	0.6665	0.5993	0	0	0.7058	0.7036	0.7117	0.6993	0.6899	0.6468	0.5951	0.0052	0.0039	0.6853	0.6905	0.6885	0.6961	0.6815	0.6363	0.5865	0	0
786	0.7287	0.7267	0.7183	0.7138	0.7051	0.6694	0.6016	0	0	0.7058	0.7046	0.7138	0.7015	0.6899	0.6503	0.5961	0.0053	0.0048	0.6859	0.6913	0.6924	0.6988	0.6809	0.6405	0.588	0	0
789	0.7292	0.728	0.7184	0.7152	0.7072	0.6717	0.6045	0	0	0.7059	0.7045	0.7127	0.7024	0.6916	0.6526	0.5987	0.0051	0.0046	0.6853	0.6915	0.6896	0.6997	0.6821	0.6431	0.591	0	0
792	0.7295	0.7279	0.7189	0.7157	0.7076	0.6736	0.6069	0	0	0.7061	0.7048	0.7131	0.7034	0.6925	0.6543	0.6012	0.0046	0.0045	0.6857	0.6917	0.6899	0.7003	0.6828	0.6448	0.5928	0	0
795	0.7308	0.7298	0.7204	0.7172	0.7106	0.6754	0.6105	0	0	0.7078	0.7065	0.7146	0.7049	0.6965	0.6544	0.6043	0.0055	0.005	0.6871	0.6932	0.6909	0.7017	0.688	0.6441	0.5961	0	0
798	0.7314	0.7299	0.721	0.7173	0.711	0.6775	0.6125	0	0	0.7081	0.7071	0.7151	0.7031	0.6972	0.6564	0.6065	0.0053	0.005	0.6878	0.6937	0.692	0.6993	0.6896	0.6463	0.5982	0	0
801	0.7324	0.7308	0.7222	0.719	0.713	0.6801	0.6157	0	0	0.7093	0.7078	0.7161	0.7044	0.6988	0.659	0.6094	0.0059	0.0052	0.689	0.6946	0.6926	0.701	0.6909	0.6486	0.6013	0	0
804	0.7326	0.7314	0.7223	0.7192	0.7137	0.6831	0.6179	0	0	0.7095	0.7077	0.7165	0.7048	0.6997	0.6611	0.6117	0.0054	0.0051	0.6886	0.6944	0.693	0.7014	0.6915	0.6505	0.6034	0	0
807	0.7324	0.7315	0.7231	0.7196	0.7142	0.687	0.6194	0	0	0.7091	0.7085	0.7172	0.7059	0.6988	0.6639	0.6134	0.005	0.0038	0.6884	0.6953	0.6935	0.7022	0.6897	0.6529	0.6056	0	0
810	0.7339	0.733	0.724	0.7213	0.7157	0.6936	0.6229	0	0	0.7104	0.7094	0.7181	0.7069	0.7019	0.6677	0.6164	0.0058	0.0054	0.6899	0.6962	0.6946	0.7034	0.6936	0.6559	0.6079	0	0
813	0.734	0.7327	0.7242	0.721	0.7157	0.6957	0.6241	0	0	0.7102	0.709	0.7181	0.7067	0.7016	0.6702	0.6173	0.0054	0.005	0.6894	0.6955	0.6939	0.7033	0.6937	0.6572	0.6088	0	0
816	0.7335	0.7324	0.7241	0.7213	0.716	0.6984	0.6263	0	0	0.7099	0.709	0.718	0.7072	0.7005	0.6768	0.62	0.0053	0.0035	0.689	0.6955	0.6941	0.7038	0.6915	0.6618	0.6112	0	0
819	0.7349	0.7334	0.7255	0.7224	0.7175	0.7018	0.6283	0	0	0.711	0.7102	0.7193	0.7083	0.7037	0.6805	0.6218	0.0054	0.0054	0.6905	0.6967	0.695	0.7048	0.695	0.6682	0.6136	0	0
822	0.736	0.7345	0.7262	0.7237	0.7187	0.7043	0.6306	0	0	0.7117	0.7106	0.7199	0.7092	0.7044	0.6837	0.6243	0.0059	0.0056	0.6916	0.6976	0.6961	0.7055	0.6964	0.6724	0.616	0	0
825	0.736	0.7341	0.7263	0.7237	0.7193	0.7062	0.6317	0	0	0.7114	0.7117	0.72	0.7095	0.7051	0.6857	0.6224	0.0055	0.0056	0.6912	0.6981	0.6972	0.7061	0.6966	0.6755	0.6131	0	0
828	0.7364	0.7352	0.727	0.7249	0.7207	0.7081	0.6345	0	0	0.7123	0.7118	0.7209	0.711	0.7062	0.6884	0.625	0.0054	0.0056	0.6918	0.6982	0.6971	0.7071	0.6978	0.6783	0.6157	0	0
831	0.7368	0.7357	0.7274	0.725	0.7213	0.7096	0.6363	0	0	0.7124	0.7118	0.7213	0.7112	0.7069	0.6899	0.6268	0.0049	0.0048	0.6924	0.6983	0.6969	0.7075	0.6981	0.6802	0.6175	0	0
834	0.7383	0.7373	0.7292	0.7268	0.7232	0.7116	0.6389	0	0	0.714	0.7135	0.7228	0.7128	0.7082	0.6931	0.6297	0.0054	0.0056	0.6939	0.7002	0.6985	0.709	0.6998	0.6827	0.6202	0	0
837	0.7384	0.7373	0.7294	0.7272	0.7239	0.7131	0.6412	0	0	0.7138	0.7138	0.7232	0.7132	0.7089	0.694	0.6313	0.0056	0.0055	0.6937	0.7003	0.6989	0.7096	0.7002	0.6846	0.622	0	0
840	0.74	0.7387	0.7307	0.7286	0.7248	0.7147	0.6434	0	0	0.7152	0.7156	0.7246	0.7144	0.7099	0.6958	0.6337	0.0059	0.0058	0.6954	0.702	0.7004	0.7107	0.7012	0.6865	0.6244	0	0
843	0.7392	0.7387	0.7301	0.7285	0.7251	0.7153	0.6446	0	0	0.7145	0.7161	0.7237	0.7141	0.7101	0.6965	0.6349	0.0057	0.0057	0.6946	0.7036	0.6995	0.7101	0.7014	0.6868	0.6253	0	0
846	0.7398	0.7393	0.7313	0.7295	0.7262	0.7164	0.6471	0	0	0.7156	0.717	0.7253	0.7151	0.7114	0.6982	0.6374	0.0058	0.0059	0.6957	0.7046	0.7007	0.7114	0.7027	0.6887	0.628	0	0
849	0.7394	0.7389	0.7309	0.7289	0.7254	0.7168	0.6481	0.0001	0.0001	0.7149	0.7169	0.7244	0.7151	0.7108	0.6979	0.638	0.0047	0.0048	0.6956	0.7046	0.7	0.7111	0.7019	0.6889	0.6284	0.0001	0.0001
852	0.74	0.7401	0.7321	0.7306	0.7263	0.7189	0.6514	0	0	0.7153	0.7156	0.7259	0.7168	0.7114	0.7011	0.6413	0.0062	0.0041	0.6951	0.7027	0.7013	0.7132	0.7014	0.6914	0.6318	0	0
855	0.7417	0.7408	0.7324	0.7307	0.7279	0.7199	0.6529	0	0	0.7164	0.7184	0.7259	0.7166	0.713	0.7006	0.6427	0.0053	0.0051	0.697	0.7059	0.702	0.7128	0.704	0.6916	0.633	0	0
858	0.742	0.7417	0.7328	0.7314	0.7293	0.7209	0.6551	0	0	0.7162	0.7189	0.7264	0.7174	0.7137	0.7017	0.6453	0.0055	0.0056	0.697	0.7064	0.7022	0.7137	0.7044	0.693	0.6353	0	0
861	0.7428	0.7425	0.7338	0.7325	0.7298	0.724	0.6572	0	0	0.7176	0.7197	0.7274	0.7186	0.7148	0.7061	0.6475	0.006	0.0061	0.6984	0.7072	0.7033	0.7145	0.7057	0.698	0.6378	0	0
864	0.7439	0.7437	0.7346	0.7333	0.7311	0.7248	0.6598	0	0	0.7184	0.7211	0.7282	0.7194	0.7158	0.7075	0.6501	0.0062	0.0066	0.6992	0.7085	0.7041	0.7157	0.7065	0.6996	0.6402	0	0
867	0.7433	0.7438	0.7345	0.7336	0.7313	0.7252	0.6611	0	0	0.7177	0.7209	0.7279	0.7193	0.7161	0.7079	0.6514	0.0059	0.006	0.6985	0.7086	0.7039	0.7159	0.7068	0.7	0.6416	0	0
870	0.7445	0.7448	0.7357	0.7346	0.7319	0.7259	0.6649	0	0	0.7192	0.722	0.7291	0.7208	0.7166	0.7074	0.6551	0.0072	0.006	0.6998	0.7098	0.7053	0.7175	0.7063	0.6983	0.6449	0	0
873	0.7444	0.7454	0.7359	0.7347	0.7327	0.7274	0.6646	0	0	0.7192	0.7224	0.7293	0.7211	0.7176	0.7098	0.6551	0.006	0.0063	0.7004	0.7098	0.7056	0.7177	0.7081	0.7017	0.645	0	0
876	0.7443	0.7452	0.7358	0.7353	0.7322	0.7271	0.6668	0	0	0.7185	0.7219	0.7292	0.7212	0.717	0.7083	0.6567	0.0067	0.0047	0.6994	0.7094	0.7054	0.7179	0.7062	0.6993	0.6467	0	0
879	0.7461	0.7468	0.7374	0.7368	0.7353	0.7302	0.67	0	0	0.7205	0.7237	0.7305	0.7227	0.7198	0.7119	0.6598	0.007	0.0072	0.7014	0.7113	0.7068	0.7193	0.7102	0.7042	0.6498	0	0
882	0.7452	0.7472	0.7375	0.7367	0.7349	0.7306	0.6709	0	0	0.7201	0.7237	0.7301	0.7225	0.72	0.7124	0.661	0.0065	0.0066	0.7011	0.7105	0.7065	0.7194	0.7104	0.7045	0.6511	0	0
885	0.7462	0.7471	0.7376	0.7376	0.7355	0.7313	0.673	0	0	0.7206	0.7243	0.7309	0.7234	0.7208	0.7128	0.6631	0.0061	0.0062	0.7022	0.7117	0.7072	0.7203	0.7106	0.7053	0.6529	0	0
888	0.7465	0.7475	0.7382	0.7381	0.7362	0.7321	0.6747	0	0	0.7205	0.7245	0.731	0.724	0.721	0.7137	0.6649	0.006	0.0058	0.7021	0.7118	0.7071	0.7206	0.7112	0.706	0.6549	0	0
891	0.7457	0.7474	0.7372	0.7372	0.7357	0.7313	0.6757	0	0	0.7195	0.7242	0.7305	0.723	0.7204	0.7132	0.6655	0.0047	0.0046	0.7012	0.7114	0.7069	0.7198	0.7105	0.7057	0.6555	0	0
894	0.7466	0.7485	0.7387	0.7387	0.7371	0.7331	0.6786	0	0	0.7211	0.7248	0.7312	0.7242	0.7219	0.7145	0.6684	0.0048	0.0047	0.7022	0.7123	0.7075	0.7209	0.7118	0.7068	0.6589	0	0
897	0.7476	0.7494	0.7394	0.7393	0.7384	0.7342	0.6813	0	0	0.7216	0.7257	0.7319	0.7248	0.7229	0.7154	0.6715	0.0051	0.0055	0.7032	0.713	0.7082	0.7219	0.7128	0.7077	0.6625	0	0
900	0.7481	0.7504	0.7398	0.74	0.7384	0.735	0.6852	0	0	0.7218	0.7265	0.7324	0.7256	0.7232	0.7162	0.6755	0.0052	0.0054	0.7035	0.7136	0.7088	0.7225	0.7134	0.7083	0.668	0	0
903	0.7475	0.7497	0.74	0.7398	0.7386	0.735	0.6892	0	0	0.721	0.7261	0.7322	0.7257	0.7232	0.7165	0.6797	0.0043	0.0048	0.7024	0.7134	0.7085	0.7227	0.7131	0.7084	0.672	0	0
906	0.7479	0.7503	0.7402	0.7406	0.7394	0.7358	0.6932	0	0	0.7216	0.7269	0.7324	0.7265	0.7241	0.7172	0.6842	0.0047	0.0046	0.7037	0.7143	0.7087	0.7231	0.7139	0.7096	0.6755	0	0
909	0.7482	0.7522	0.7414	0.7409	0.74	0.7366	0.6969	0	0	0.7211	0.7272	0.7338	0.7273	0.7253	0.7183	0.6878	0.0047	0.0046	0.701	0.7152	0.71	0.7245	0.7151	0.7102	0.6786	0	0
912	0.7477	0.7515	0.741	0.7407	0.7401	0.737	0.6991	0	0	0.7208	0.7274	0.7342	0.7274	0.7252	0.7187	0.69	0.0043	0.0044	0.701	0.715	0.7102	0.7243	0.7158	0.7105	0.6806	0	0
915	0.749	0.7538	0.7423	0.7423	0.741	0.7384	0.7023	0	0	0.7215	0.7286	0.7346	0.7285	0.7266	0.7196	0.6932	0.0048	0.0046	0.7013	0.7163	0.711	0.7257	0.7168	0.7115	0.6835	0	0
918	0.7501	0.7549	0.7439	0.7438	0.7426	0.7398	0.7049	0	0	0.7233	0.7297	0.7368	0.7302	0.7277	0.7213	0.696	0.0052	0.0059	0.7022	0.7174	0.7123	0.7272	0.7178	0.7133	0.6863	0	0
921	0.7504	0.7554	0.7436	0.7439	0.7426	0.7402	0.7058	0	0	0.7236	0.7299	0.737	0.7302	0.7284	0.7216	0.6969	0.0043	0.0045	0.7025	0.7168	0.7127	0.7273	0.719	0.7135	0.6875	0	0
924	0.7506	0.7563	0.7449	0.7449	0.7434	0.7415	0.708	0	0	0.7249	0.7309	0.7384	0.7317	0.7295	0.7229	0.6997	0.0043	0.0053	0.7035	0.718	0.7135	0.7287	0.7203	0.715	0.6896	0	0
927	0.7512	0.7575	0.7457	0.7455	0.7445	0.7426	0.71	0	0	0.7262	0.7317	0.7396	0.7323	0.7305	0.724	0.7009	0.0047	0.0053	0.704	0.7185	0.7149	0.7296	0.7215	0.7156	0.6914	0	0
930	0.7525	0.7586	0.747	0.7466	0.7459	0.7442	0.7118	0	0	0.7274	0.7328	0.741	0.7334	0.7315	0.7256	0.7033	0.0053	0.006	0.7042	0.7191	0.7162	0.7306	0.7227	0.7169	0.6932	0	0
933	0.7531	0.7594	0.7481	0.7478	0.7465	0.7454	0.7135	0	0	0.7283	0.7337	0.742	0.7347	0.7329	0.7267	0.7046	0.0049	0.0062	0.7047	0.7203	0.7168	0.7319	0.7241	0.7182	0.6949	0	0
936	0.7531	0.7595	0.7481	0.7478	0.7465	0.7456	0.7139	0	0	0.7291	0.7342	0.742	0.7352	0.733	0.7267	0.7052	0.005	0.0056	0.7051	0.7203	0.7173	0.7323	0.7242	0.7179	0.6957	0	0
939	0.7537	0.7604	0.7489	0.7488	0.7478	0.7465	0.7157	0	0	0.7306	0.7354	0.7434	0.736	0.7345	0.7278	0.7065	0.0053	0.0063	0.7057	0.7216	0.7188	0.7333	0.7257	0.7192	0.6968	0	0
942	0.7538	0.7612	0.7497	0.7491	0.748	0.7472	0.7163	0	0	0.7315	0.7358	0.7443	0.7365	0.7349	0.7288	0.7076	0.0046	0.0027	0.7066	0.7219	0.7195	0.7339	0.7261	0.7203	0.6983	0	0
945	0.7557	0.7631	0.7514	0.7511	0.7485	0.7482	0.7181	0	0	0.7336	0.7379	0.7462	0.7389	0.7354	0.7283	0.7095	0.0068	0.0029	0.7079	0.7243	0.7215	0.7364	0.7263	0.7195	0.7003	0	0
948	0.7562	0.764	0.7525	0.7522	0.75	0.7499	0.7204	0	0	0.735	0.7393	0.7474	0.7406	0.7369	0.73	0.7115	0.0073	0.0037	0.7089	0.7253	0.723	0.738	0.7278	0.7209	0.7022	0	0
951	0.7573	0.7648	0.7536	0.7531	0.7507	0.7509	0.7218	0	0	0.7366	0.7402	0.7483	0.7414	0.7379	0.7308	0.7131	0.0075	0.0038	0.7101	0.7267	0.7241	0.7392	0.7289	0.722	0.7035	0	0
954	0.7574	0.7651	0.7538	0.7534	0.7524	0.7528	0.7227	0	0	0.7373	0.7405	0.7493	0.7414	0.7398	0.7336	0.7146	0.0062	0.0045	0.7104	0.7269	0.725	0.7385	0.7312	0.7251	0.7042	0	0
957	0.7568	0.7646	0.7536	0.7529	0.7522	0.7529	0.7231	0	0	0.737	0.7403	0.749	0.741	0.7399	0.7335	0.7141	0.0055	0.0037	0.71	0.7265	0.7249	0.7386	0.7314	0.7252	0.7044	0	0
960	0.7576	0.7658	0.7546	0.7548	0.7525	0.7529	0.7247	0	0	0.7383	0.7418	0.7504	0.7436	0.74	0.7329	0.7161	0.0061	0.0037	0.7105	0.7281	0.7262	0.7411	0.7312	0.7238	0.7064	0	0
963	0.7578	0.7657	0.7548	0.7543	0.7537	0.7546	0.7253	0	0	0.7385	0.7415	0.7504	0.7426	0.741	0.7354	0.7166	0.0058	0.0035	0.7116	0.7285	0.7262	0.7403	0.7328	0.727	0.7069	0	0
966	0.7576	0.7656	0.7549	0.7545	0.7534	0.7537	0.7255	0	0	0.7389	0.7422	0.7507	0.7437	0.7411	0.7335	0.7159	0.0054	0.0037	0.7117	0.7288	0.7268	0.7416	0.7323	0.7248	0.706	0	0
969	0.7578	0.7662	0.7554	0.7554	0.7539	0.7544	0.7254	0	0	0.7396	0.7427	0.7515	0.7443	0.7415	0.7344	0.7137	0.0065	0.0034	0.7119	0.7292	0.7274	0.7417	0.7327	0.7248	0.7038	0	0
972	0.7572	0.7661	0.7551	0.7551	0.7537	0.7551	0.7271	0	0	0.7392	0.7425	0.751	0.7442	0.741	0.7348	0.7178	0.0049	0.0026	0.7114	0.7292	0.7274	0.7415	0.7321	0.7256	0.7086	0	0
975	0.7568	0.7659	0.7558	0.7548	0.7543	0.7565	0.7281	0	0	0.7398	0.7426	0.7531	0.7435	0.7425	0.7366	0.7187	0.0044	0.0029	0.7124	0.729	0.7302	0.7407	0.7341	0.7282	0.7088	0	0
978	0.759	0.7679	0.7581	0.7572	0.7555	0.7573	0.7299	0	0	0.7414	0.7446	0.7556	0.7459	0.743	0.7367	0.7207	0.006	0.0034	0.7143	0.7315	0.7327	0.7437	0.7336	0.7279	0.7112	0	0
981	0.7594	0.768	0.7585	0.7583	0.7566	0.7581	0.7304	0	0	0.7422	0.7447	0.7559	0.7476	0.7446	0.7383	0.721	0.0061	0.0045	0.7144	0.7316	0.733	0.7453	0.7361	0.7295	0.7111	0	0
984	0.7593	0.7681	0.7586	0.7577	0.7579	0.76	0.7321	0	0	0.7422	0.7451	0.7562	0.7465	0.7455	0.7402	0.7229	0.0062	0.0045	0.7149	0.7322	0.7331	0.7441	0.7372	0.7318	0.7128	0	0
987	0.7586	0.7681	0.7586	0.7578	0.7573	0.7598	0.7325	0	0	0.7421	0.745	0.7559	0.7465	0.7452	0.7399	0.723	0.0053	0.004	0.7143	0.7319	0.7333	0.7437	0.7371	0.7319	0.7132	0	0
990	0.7589	0.7688	0.7588	0.7581	0.758	0.7608	0.7332	0	0	0.743	0.7458	0.7561	0.747	0.7458	0.7406	0.7239	0.0056	0.0041	0.7151	0.7323	0.7336	0.7447	0.7375	0.7328	0.7141	0	0
993	0.76	0.7696	0.7602	0.7596	0.7594	0.7623	0.735	0	0	0.7441	0.7467	0.7573	0.7485	0.7473	0.742	0.7254	0.0061	0.0045	0.7166	0.7335	0.7348	0.746	0.7387	0.7342	0.7157	0	0
996	0.7605	0.7699	0.7605	0.7601	0.7604	0.7631	0.7362	0	0	0.7445	0.7473	0.7583	0.7493	0.7482	0.7432	0.7266	0.0065	0.0049	0.7166	0.7343	0.7355	0.7467	0.7393	0.7351	0.717	0	0

## Sheet: Bifidobacterium longum
DATA(x)	A1_DATA(y)	B1_DATA(y)	C1_DATA(y)	D1_DATA(y)	E1_DATA(y)	F1_DATA(y)	G1_DATA(y)	H1_DATA(y)	A2_DATA(y)	B2_DATA(y)	C2_DATA(y)	D2_DATA(y)	E2_DATA(y)	F2_DATA(y)	G2_DATA(y)	H2_DATA(y)	A3_DATA(y)	B3_DATA(y)	C3_DATA(y)	D3_DATA(y)	E3_DATA(y)	F3_DATA(y)	G3_DATA(y)	H3_DATA(y)	A4_DATA(y)	B4_DATA(y)	C4_DATA(y)	D4_DATA(y)	E4_DATA(y)	F4_DATA(y)	G4_DATA(y)	H4_DATA(y)	A5_DATA(y)	B5_DATA(y)	C5_DATA(y)	D5_DATA(y)	E5_DATA(y)	F5_DATA(y)	G5_DATA(y)	H5_DATA(y)	A6_DATA(y)	B6_DATA(y)	C6_DATA(y)	D6_DATA(y)	E6_DATA(y)	F6_DATA(y)	G6_DATA(y)	H6_DATA(y)	A7_DATA(y)
0	0	0	0	0	0	0	0	0	0.0001	0	0	0	0.0002	0	0	0	0	0	0	0.0002	0	0	0	0	0	0	0.0002	0	0.0001	0	0.0004	0.0006	0	0.0004	0	0.0001	0.0005	0.0001	0	0.0046	0	0	0	0	0	0.0004	0.001	0.0018	0.0006
1	0	0	0	0	0	0	0	0	0.0001	0	0	0	0.0002	0	0	0	0	0	0	0.0002	0	0	0	0	0	0	0.0002	0	0.0001	0	0.0004	0.0006	0	0.0004	0	0.0001	0.0005	0.0001	0	0.0046	0	0	0	0	0	0.0004	0.001	0.0018	0.0006
2	0	0	0	0	0	0	0	0	0.0001	0	0	0	0.0001	0.0002	0.0006	0	0	0	0	0.0001	0	0	0.0001	0.0005	0	0	0.0001	0	0.0001	0	0.0003	0.0006	0	0.0003	0	0.0001	0.0003	0.0001	0.0014	0.0031	0	0	0	0	0.0019	0.0004	0.0011	0.0034	0.0007
3	0	0	0	0	0	0	0	0	0.0001	0.0006	0	0	0.0003	0	0.0002	0	0	0	0	0.0001	0	0	0	0.0005	0	0	0.0001	0	0.0001	0	0.0003	0.0004	0	0.0003	0	0.0001	0.0003	0.0001	0.0004	0.0031	0	0	0	0	0.0005	0.0003	0.0008	0.0017	0.0005
4	0	0	0	0	0	0	0	0	0.0001	0.0001	0	0	0.0002	0	0.0002	0	0	0	0	0.0001	0	0	0	0.0002	0	0	0.0001	0	0.0001	0	0.0005	0.0005	0.0001	0.0005	0.0001	0.0001	0.0005	0.0001	0.0008	0.004	0	0	0	0	0.0005	0.0003	0.0008	0.0017	0.0005
5	0	0	0	0	0	0	0	0	0.0001	0.0001	0	0	0.0002	0	0.0002	0	0	0	0	0.0001	0	0	0	0.0002	0	0	0.0001	0	0.0001	0	0.0003	0.0004	0	0.0003	0	0.0001	0.0019	0.0001	0.0004	0.0032	0	0	0	0	0.0005	0.0003	0.0008	0.0017	0.0005
6	0	0	0	0	0	0	0	0	0.0001	0.0001	0	0	0.0002	0	0.0002	0	0	0	0	0.0001	0	0	0	0.0002	0	0	0.0001	0	0.0001	0	0.0003	0.0004	0	0.0003	0	0.0001	0.0031	0.0001	0.0007	0.0047	0	0	0	0	0.0005	0.0003	0.0008	0.0017	0.0005
7	0	0	0	0	0	0	0	0	0.0001	0.0001	0	0	0.0002	0	0.0002	0	0	0	0	0.0001	0	0	0	0.0002	0	0	0.0001	0	0.0001	0	0.0003	0.0004	0	0.0003	0	0.0001	0.0009	0.0001	0.0005	0.0036	0	0	0	0	0.0005	0.0003	0.0008	0.0022	0.0005
8	0	0	0	0	0	0	0	0	0.0001	0.0001	0	0	0.0002	0	0.0002	0	0	0	0	0.0001	0	0	0	0.0002	0	0	0.0001	0	0.0001	0.0003	0.0003	0.0004	0	0.0003	0	0.0001	0.0012	0.0001	0.0006	0.0036	0	0	0	0	0.0005	0.0003	0.0008	0.0018	0.0005
9	0	0	0	0	0	0	0	0	0.0001	0.0001	0	0	0.0002	0	0.0002	0	0	0	0	0.0001	0	0	0	0.0002	0	0	0.0001	0	0.0001	0	0.0003	0.0004	0	0.0003	0	0.0001	0.0009	0.0001	0.0006	0.0041	0	0	0	0	0.0005	0.0003	0.0008	0.0021	0.0005
10	0	0	0	0	0	0	0	0	0.0001	0.0002	0	0	0.0002	0	0.0002	0	0	0	0	0.0001	0	0	0	0.0002	0	0	0.0001	0	0.0001	0	0.0003	0.0004	0	0.0003	0	0.0001	0.0012	0.0001	0.0005	0.0034	0	0	0	0	0.0008	0.0003	0.0008	0.002	0.0005
11	0	0	0	0	0	0	0	0	0.0001	0.0002	0	0	0.0002	0	0.0002	0	0	0	0	0.0001	0	0	0	0.0002	0	0	0.0001	0	0.0001	0	0.0003	0.0004	0	0.0003	0	0.0001	0.0019	0.0001	0.0007	0.0033	0	0	0	0	0.001	0.0003	0.0008	0.002	0.0005
12	0	0	0	0	0	0	0	0	0.0001	0.0002	0	0	0.0002	0	0.0002	0	0	0	0	0.0001	0	0	0	0.0002	0	0	0.0001	0	0.0001	0	0.0003	0.0004	0	0.0003	0	0.0001	0.0012	0.0001	0.0006	0.0033	0	0	0	0	0.0008	0.0003	0.0007	0.0017	0.0004
13	0	0	0	0	0	0	0	0	0.0001	0.0001	0	0	0.0002	0	0.0002	0	0	0	0	0.0001	0	0	0	0.0002	0	0	0.0001	0	0.0001	0	0.0003	0.0004	0	0.0003	0	0.0001	0.0013	0.0001	0.0005	0.0033	0	0	0	0	0.0007	0.0003	0.0007	0.0017	0.0004
14	0	0	0	0	0	0	0	0	0.0001	0.0001	0	0	0.0002	0	0.0002	0	0	0	0	0.0001	0	0	0	0.0002	0	0	0.0001	0	0.0001	0	0.0003	0.0004	0	0.0003	0	0.0001	0.0019	0.0001	0.0005	0.0032	0	0	0	0	0.0008	0.0003	0.0007	0.0017	0.0004
15	0	0	0	0	0	0	0	0	0.0001	0.0001	0	0	0.0002	0	0.0002	0	0	0	0	0.0001	0	0	0	0.0002	0	0	0.0001	0	0.0001	0	0.0003	0.0004	0	0.0003	0	0.0001	0.0014	0.0001	0.0006	0.0032	0	0	0	0	0.0006	0.0003	0.0007	0.0017	0.0004
16	0	0	0	0	0	0	0	0	0.0001	0.0001	0	0	0.0002	0	0.0002	0	0	0	0	0.0001	0	0	0	0.0002	0	0	0.0001	0	0.0001	0	0.0003	0.0004	0	0.0003	0	0.0001	0.0012	0.0001	0.0005	0.0031	0	0	0	0	0.001	0.0003	0.0007	0.0017	0.0004
17	0	0	0	0	0	0	0	0	0.0001	0.0001	0	0	0.0002	0	0.0002	0	0	0	0	0.0001	0	0	0	0.0002	0	0	0.0001	0	0.0001	0	0.0003	0.0004	0	0.0003	0	0.0001	0.0018	0.0001	0.0005	0.0031	0	0	0	0	0.0007	0.0003	0.0007	0.0016	0.0004
18	0	0	0	0	0	0	0	0	0.0001	0.0001	0	0	0.0002	0	0.0002	0	0	0	0	0.0001	0	0	0	0.0002	0	0	0.0001	0	0.0001	0	0.0003	0.0004	0	0.0003	0	0.0001	0.0013	0.0001	0.0005	0.0032	0	0	0	0	0.0009	0.0003	0.0007	0.0016	0.0004
19	0	0	0	0	0	0	0	0	0.0001	0.0001	0	0	0.0002	0	0.0002	0	0	0	0	0.0001	0	0	0	0.0002	0	0	0.0001	0	0.0001	0	0.0003	0.0004	0	0.0003	0	0.0001	0.0023	0.0001	0.0005	0.0029	0	0	0	0	0.0007	0.0003	0.0007	0.0016	0.0004
20	0	0	0	0	0	0	0	0	0.0001	0.0001	0	0	0.0002	0	0.0002	0	0	0	0	0.0001	0	0	0	0.0002	0	0	0.0001	0	0.0001	0	0.0003	0.0004	0	0.0003	0	0.0001	0.0014	0.0001	0.0005	0.0029	0	0	0	0	0.0007	0.0003	0.0006	0.0015	0.0004
21	0	0	0	0	0	0	0	0	0.0001	0.0001	0	0	0.0002	0	0.0002	0	0	0	0	0.0001	0	0	0	0.0002	0	0	0.0001	0	0.0001	0	0.0003	0.0004	0	0.0003	0	0.0001	0.0026	0.0001	0.0005	0.0028	0	0	0	0	0.0007	0.0003	0.0006	0.0015	0.0004
22	0	0	0	0	0	0	0	0	0.0001	0.0001	0	0	0.0002	0	0.0002	0	0	0	0	0.0001	0	0	0	0.0002	0	0	0.0001	0	0.0001	0	0.0003	0.0004	0	0.0003	0	0.0001	0.0015	0.0001	0.0005	0.0028	0	0	0	0	0.0007	0.0003	0.0006	0.0015	0.0004
23	0	0	0	0	0	0	0	0	0.0001	0.0001	0	0	0.0002	0	0.0002	0	0	0	0	0.0001	0	0	0	0.0002	0	0	0.0001	0	0.0001	0	0.0003	0.0004	0	0.0003	0	0.0001	0.0015	0.0001	0.0005	0.0027	0	0	0	0	0.0007	0.0003	0.0006	0.0014	0.0004
24	0	0	0	0	0	0	0	0	0.0001	0.0001	0	0	0.0002	0	0.0002	0	0	0	0	0.0001	0	0	0	0.0002	0	0	0.0001	0	0.0001	0	0.0003	0.0004	0	0.0003	0	0.0001	0.0015	0.0001	0.0005	0.0027	0	0	0	0	0.001	0.0003	0.0006	0.0014	0.0004
25	0	0	0	0	0	0	0	0	0.0001	0.0001	0	0	0.0002	0	0.0002	0	0	0	0	0.0001	0	0	0	0.0002	0	0	0.0001	0	0.0001	0	0.0003	0.0004	0	0.0003	0	0.0001	0.0015	0.0001	0.0004	0.0026	0	0	0	0	0.0009	0.0003	0.0006	0.0014	0.0004
26	0	0	0	0	0	0	0	0	0.0001	0.0001	0	0	0.0002	0	0.0002	0	0	0	0	0.0001	0	0	0	0.0002	0	0	0.0001	0	0.0001	0	0.0003	0.0004	0	0.0003	0	0.0001	0.0028	0.0001	0.0004	0.0026	0	0	0	0	0.0007	0.0003	0.0006	0.0014	0.0004
27	0	0	0	0	0	0	0	0	0.0001	0.0001	0	0	0.0002	0	0.0002	0	0	0	0	0.0001	0	0	0	0.0002	0	0	0.0001	0	0.0001	0	0.0003	0.0004	0	0.0003	0	0.0001	0.0016	0.0001	0.0004	0.0025	0	0	0	0	0.0007	0.0003	0.0006	0.0013	0.0004
28	0	0	0	0	0	0	0	0	0.0001	0.0001	0	0	0.0002	0	0.0002	0	0	0	0	0.0001	0	0	0	0.0002	0	0	0.0001	0	0.0001	0	0.0003	0.0004	0	0.0003	0	0.0001	0.0019	0.0001	0.0004	0.0024	0	0	0	0	0.0007	0.0003	0.0005	0.0013	0.0004
29	0	0	0	0	0	0	0	0	0.0001	0.0001	0	0	0.0002	0	0.0002	0	0	0	0	0.0001	0	0	0	0.0002	0	0	0.0001	0	0.0001	0	0.0003	0.0004	0	0.0003	0	0.0001	0.0016	0.0001	0.0004	0.0024	0	0	0	0	0.0008	0.0003	0.0005	0.0013	0.0004
30	0	0	0	0	0	0	0	0	0.0001	0.0001	0	0	0.0002	0	0.0002	0	0	0	0	0.0001	0	0	0	0.0002	0	0	0.0001	0	0.0001	0	0.0003	0.0004	0	0.0003	0	0.0001	0.0016	0.0001	0.0004	0.0023	0	0	0	0	0.0007	0.0003	0.0005	0.0012	0.0004
31	0	0	0	0	0	0	0	0	0.0001	0.0001	0	0	0.0002	0	0.0002	0	0	0	0	0.0001	0	0	0	0.0002	0	0	0.0001	0	0.0001	0	0.0003	0.0004	0	0.0003	0	0.0001	0.0018	0.0001	0.0004	0.0023	0	0	0	0	0.0007	0.0003	0.0005	0.0012	0.0004
32	0	0	0	0	0	0	0	0	0.0001	0.0001	0	0	0.0002	0	0.0002	0	0	0	0	0.0001	0	0	0	0.0002	0	0	0.0001	0	0.0001	0	0.0003	0.0004	0	0.0003	0	0.0001	0.0019	0.0001	0.0004	0.0022	0	0	0	0	0.0007	0.0003	0.0005	0.0012	0.0004
33	0	0	0	0	0	0	0	0	0.0001	0.0001	0	0	0.0002	0	0.0002	0	0	0	0	0.0001	0	0	0	0.0002	0	0	0.0001	0	0.0001	0	0.0003	0.0004	0	0.0003	0	0.0001	0.0016	0.0001	0.0004	0.0022	0	0	0	0	0.0007	0.0003	0.0005	0.0012	0.0004
34	0	0	0	0	0	0	0	0	0.0001	0.0001	0	0	0.0002	0	0.0002	0	0	0	0	0.0001	0	0	0	0.0002	0	0	0.0001	0	0.0001	0	0.0003	0.0004	0	0.0003	0	0.0001	0.0016	0.0001	0.0004	0.0022	0	0	0	0	0.0007	0.0003	0.0005	0.0011	0.0004
35	0	0	0	0	0	0	0	0	0.0001	0.0001	0	0	0.0002	0	0.0002	0	0	0	0	0.0001	0	0	0	0.0002	0	0	0.0001	0	0.0001	0	0.0003	0.0004	0	0.0003	0	0.0001	0.0024	0.0001	0.0004	0.0021	0	0	0	0	0.0006	0.0003	0.0005	0.0011	0.0004
36	0	0	0	0	0	0	0	0	0.0001	0.0001	0	0	0.0002	0	0.0002	0	0	0	0	0.0001	0	0	0	0.0002	0	0	0.0001	0	0.0001	0	0.0003	0.0004	0	0.0003	0	0.0001	0.0016	0.0001	0.0004	0.0021	0	0	0	0	0.0006	0.0003	0.0005	0.0011	0.0004
37	0	0	0	0	0	0	0	0	0.0001	0.0001	0	0	0.0002	0	0.0002	0	0	0	0	0.0001	0	0	0	0.0002	0	0	0.0001	0	0.0001	0	0.0003	0.0004	0	0.0003	0	0.0001	0.0016	0.0001	0.0004	0.002	0	0	0	0	0.0006	0.0003	0.0004	0.0011	0.0004
38	0	0	0	0	0	0	0	0	0.0001	0.0001	0	0	0.0002	0	0.0002	0	0	0	0	0.0001	0	0	0	0.0002	0	0	0.0001	0	0.0001	0	0.0003	0.0004	0	0.0003	0	0.0001	0.0016	0.0001	0.0004	0.002	0	0	0	0	0.0006	0.0003	0.0004	0.001	0.0004
39	0	0	0	0	0	0	0	0	0.0001	0.0001	0	0	0.0002	0	0.0002	0	0	0	0	0.0001	0	0	0	0.0002	0	0	0.0001	0	0.0001	0	0.0003	0.0004	0	0.0003	0	0.0001	0.0016	0.0001	0.0004	0.0019	0	0	0	0	0.0006	0.0003	0.0004	0.001	0.0004
40	0	0	0	0	0	0	0	0	0.0001	0.0001	0	0	0.0002	0	0.0002	0	0	0	0	0.0001	0	0	0	0.0002	0	0	0.0001	0	0.0001	0	0.0003	0.0004	0	0.0003	0	0.0001	0.0018	0.0001	0.0004	0.0019	0	0	0	0	0.0008	0.0003	0.0004	0.001	0.0004
41	0	0	0	0	0	0	0	0	0.0001	0.0001	0	0	0.0002	0	0.0002	0	0	0	0	0.0001	0	0	0	0.0002	0	0	0.0001	0	0.0001	0	0.0003	0.0004	0	0.0003	0	0.0001	0.0016	0.0001	0.0004	0.0019	0	0	0	0	0.0006	0.0003	0.0004	0.001	0.0004
42	0	0	0	0	0	0	0	0	0.0001	0.0001	0	0	0.0002	0	0.0002	0	0	0	0	0.0001	0	0	0	0.0002	0	0	0.0001	0	0.0001	0	0.0003	0.0004	0	0.0003	0	0.0001	0.0015	0.0001	0.0004	0.0018	0	0	0	0	0.0006	0.0003	0.0004	0.001	0.0004
43	0	0	0	0	0	0	0	0	0.0001	0.0001	0	0	0.0002	0	0.0002	0	0	0	0	0.0001	0	0	0	0.0002	0	0	0.0001	0	0.0001	0	0.0003	0.0004	0	0.0003	0	0.0001	0.0016	0.0001	0.0004	0.0018	0	0	0	0	0.0006	0.0003	0.0004	0.0009	0.0004
44	0	0	0	0	0	0	0	0	0.0001	0.0001	0	0	0.0002	0	0.0002	0	0	0	0	0.0001	0	0	0	0.0002	0	0	0.0001	0	0.0001	0	0.0003	0.0004	0	0.0003	0	0.0001	0.0018	0.0001	0.0004	0.0018	0	0	0	0	0.0006	0.0003	0.0004	0.0009	0.0004
45	0	0	0	0	0	0	0	0	0.0001	0.0001	0	0	0.0002	0	0.0002	0	0	0	0	0.0001	0	0	0	0.0002	0	0	0.0001	0	0.0001	0	0.0003	0.0004	0	0.0003	0	0.0001	0.0015	0.0001	0.0004	0.0017	0	0	0	0	0.0006	0.0003	0.0004	0.0009	0.0004
46	0	0	0	0	0	0	0	0	0.0001	0.0001	0	0	0.0002	0	0.0002	0	0	0	0	0.0001	0	0	0	0.0002	0	0	0.0001	0	0.0001	0	0.0003	0.0004	0	0.0003	0	0.0001	0.0016	0.0001	0.0004	0.0017	0	0	0	0	0.0006	0.0003	0.0004	0.0009	0.0004
47	0	0	0	0	0	0	0	0	0.0001	0.0001	0	0	0.0002	0	0.0002	0	0	0	0	0.0001	0	0	0	0.0002	0	0	0.0001	0	0.0001	0	0.0003	0.0004	0	0.0003	0	0.0001	0.0022	0.0001	0.0004	0.0016	0	0	0	0	0.0006	0.0003	0.0004	0.0009	0.0004
48	0	0	0	0	0	0	0	0	0.0001	0.0001	0	0	0.0002	0	0.0002	0	0	0	0	0.0001	0	0	0	0.0002	0	0	0.0001	0	0.0001	0	0.0003	0.0004	0	0.0003	0	0.0001	0.0015	0.0001	0.0004	0.0016	0	0	0	0	0.0006	0.0003	0.0004	0.0008	0.0004
49	0	0	0	0	0	0	0	0	0.0001	0.0001	0	0	0.0002	0	0.0002	0	0	0	0	0.0001	0	0	0	0.0002	0	0	0.0001	0	0.0001	0	0.0003	0.0004	0	0.0003	0	0.0001	0.0023	0.0001	0.0004	0.0016	0	0	0	0	0.0006	0.0003	0.0004	0.0008	0.0004
50	0	0	0	0	0	0	0	0	0.0001	0.0001	0	0	0.0002	0	0.0002	0	0	0	0	0.0001	0	0	0	0.0002	0	0	0.0001	0	0.0001	0	0.0003	0.0004	0	0.0003	0	0.0001	0.002	0.0001	0.0004	0.0016	0	0	0	0	0.0005	0.0003	0.0004	0.0008	0.0004
51	0	0	0	0	0	0	0	0	0.0001	0.0001	0	0	0.0002	0	0.0002	0	0	0	0	0.0001	0	0	0	0.0002	0	0	0.0001	0	0.0001	0	0.0003	0.0004	0	0.0003	0	0.0001	0.0024	0.0001	0.0004	0.0015	0	0	0	0	0.0005	0.0003	0.0004	0.0008	0.0004
52	0	0	0.0001	0	0	0	0	0	0.0001	0.0001	0	0	0.0002	0	0.0002	0	0	0	0	0.0001	0	0	0	0.0002	0	0	0.0001	0	0.0001	0	0.0003	0.0004	0	0.0003	0	0.0001	0.0024	0.0001	0.0004	0.0015	0	0	0	0	0.0005	0.0003	0.0004	0.0008	0.0004
53	0	0	0.0001	0	0.0001	0	0	0	0.0001	0.0001	0	0	0.0002	0	0.0002	0	0	0	0	0.0001	0	0	0	0.0002	0	0	0.0001	0	0.0001	0	0.0003	0.0004	0	0.0003	0	0.0001	0.0025	0.0001	0.0004	0.0015	0	0	0	0	0.0005	0.0003	0.0004	0.0008	0.0004
54	0	0	0.0001	0	0.0003	0	0	0	0.0001	0.0001	0	0	0.0002	0	0.0002	0	0	0	0	0.0001	0	0	0	0.0002	0	0	0.0001	0	0.0001	0	0.0003	0.0004	0	0.0003	0	0.0001	0.0025	0.0001	0.0004	0.0014	0	0	0	0	0.0005	0.0003	0.0004	0.0008	0.0004
55	0	0	0.0002	0	0.0002	0	0	0	0.0001	0.0001	0	0	0.0002	0	0.0002	0	0	0	0	0.0001	0	0	0	0.0002	0	0	0.0001	0	0.0001	0	0.0003	0.0004	0	0.0003	0	0.0001	0.0025	0.0001	0.0004	0.0014	0	0	0	0	0.0005	0.0003	0.0004	0.0007	0.0004
56	0.0001	0.0001	0.0003	0	0.0004	0	0	0	0.0001	0.0001	0	0	0.0002	0	0.0002	0	0	0	0	0.0001	0	0	0	0.0002	0	0	0.0001	0	0.0001	0	0.0003	0.0004	0	0.0003	0	0.0001	0.0026	0.0001	0.0004	0.0014	0	0	0	0	0.0005	0.0003	0.0004	0.0007	0.0004
57	0	0	0.0004	0	0.0004	0	0	0	0.0001	0.0001	0	0	0.0002	0	0.0002	0	0	0	0	0.0001	0	0	0	0.0002	0	0	0.0001	0	0.0001	0	0.0003	0.0004	0	0.0003	0	0.0001	0.0022	0.0001	0.0004	0.0014	0	0	0	0	0.0005	0.0003	0.0004	0.0007	0.0004
58	0.0002	0.0001	0.0004	0	0.0005	0	0	0	0.0001	0.0001	0	0	0.0002	0	0.0002	0	0	0	0	0.0001	0	0	0	0.0002	0	0	0.0001	0	0.0001	0	0.0003	0.0004	0	0.0003	0	0.0001	0.0026	0.0001	0.0004	0.0013	0	0	0	0	0.0005	0.0003	0.0004	0.0007	0.0004
59	0.0002	0.0002	0.0006	0.0001	0.0006	0	0	0	0.0001	0.0001	0	0	0.0002	0	0.0002	0	0	0	0	0.0001	0	0	0	0.0002	0	0	0.0001	0	0.0001	0	0.0003	0.0004	0	0.0003	0	0.0001	0.0027	0.0001	0.0004	0.0013	0	0	0	0	0.0004	0.0003	0.0004	0.0007	0.0004
60	0.0003	0.0003	0.0007	0.0002	0.0007	0	0	0	0.0001	0.0001	0	0	0.0002	0	0.0002	0	0	0	0	0.0001	0	0	0	0.0002	0	0	0.0001	0	0.0001	0	0.0003	0.0004	0	0.0003	0	0.0001	0.0028	0.0001	0.0004	0.0013	0	0	0	0	0.0004	0.0003	0.0004	0.0007	0.0004
61	0.0005	0.0004	0.0009	0.0003	0.0009	0	0	0	0.0001	0.0001	0	0	0.0002	0	0.0002	0	0	0	0	0.0001	0	0	0	0.0002	0	0	0.0001	0	0.0001	0	0.0003	0.0004	0	0.0003	0	0.0001	0.0029	0.0001	0.0004	0.0012	0	0	0	0	0.0004	0.0003	0.0004	0.0007	0.0004
62	0.0004	0.0004	0.0009	0.0003	0.0009	0	0	0	0.0001	0.0001	0	0	0.0002	0	0.0002	0	0	0	0	0.0001	0	0	0	0.0002	0	0	0.0001	0	0.0001	0	0.0003	0.0004	0	0.0003	0	0.0001	0.0024	0.0001	0.0004	0.0012	0	0	0	0	0.0004	0.0003	0.0004	0.0007	0.0004
63	0.0006	0.0006	0.0011	0.0004	0.0011	0	0	0	0.0001	0.0001	0	0	0.0002	0	0.0002	0	0	0	0	0.0001	0	0	0	0.0002	0	0	0.0001	0	0.0001	0	0.0003	0.0004	0	0.0003	0	0.0001	0.0025	0.0001	0.0004	0.0012	0	0	0	0	0.0004	0.0003	0.0004	0.0006	0.0004
64	0.0006	0.0006	0.0012	0.0004	0.0012	0	0	0	0.0001	0.0001	0	0	0.0002	0	0.0002	0	0	0	0	0.0001	0	0	0	0.0002	0	0	0.0001	0	0.0001	0	0.0003	0.0004	0	0.0003	0	0.0001	0.0023	0.0001	0.0004	0.0012	0	0	0	0	0.0004	0.0003	0.0004	0.0006	0.0004
65	0.001	0.0009	0.0014	0.0006	0.0015	0	0	0	0.0001	0.0001	0	0	0.0002	0	0.0002	0	0	0	0	0.0001	0	0	0	0.0002	0	0	0.0001	0	0.0001	0	0.0003	0.0004	0	0.0003	0	0.0001	0.0026	0.0001	0.0004	0.0011	0	0	0	0	0.0004	0.0003	0.0004	0.0006	0.0004
66	0.0009	0.0009	0.0015	0.0007	0.0015	0	0	0	0.0001	0.0001	0	0	0.0002	0	0.0002	0	0	0	0	0.0001	0	0	0	0.0002	0	0	0.0001	0	0.0001	0	0.0003	0.0004	0	0.0003	0	0.0001	0.0023	0.0001	0.0004	0.0011	0	0	0	0	0.0004	0.0003	0.0004	0.0006	0.0004
67	0.0012	0.0011	0.0017	0.0009	0.0018	0	0	0	0.0001	0.0001	0	0	0.0002	0	0.0002	0	0	0	0	0.0001	0	0	0	0.0002	0	0	0.0001	0	0.0001	0	0.0003	0.0004	0	0.0003	0	0.0001	0.0024	0.0001	0.0004	0.0011	0	0	0	0	0.0004	0.0003	0.0004	0.0006	0.0004
68	0.0014	0.0013	0.0019	0.001	0.0019	0	0	0	0.0001	0.0001	0	0	0.0002	0	0.0002	0	0	0	0	0.0001	0	0	0	0.0002	0	0	0.0001	0	0.0001	0	0.0003	0.0004	0	0.0003	0	0.0001	0.0023	0.0001	0.0004	0.0011	0	0	0	0	0.0004	0.0003	0.0004	0.0006	0.0004
69	0.0014	0.0014	0.0021	0.0012	0.0021	0	0	0	0.0001	0.0001	0	0	0.0002	0	0.0002	0	0	0	0	0.0001	0	0	0	0.0002	0	0	0.0001	0	0.0001	0	0.0003	0.0004	0	0.0003	0	0.0001	0.0022	0.0001	0.0004	0.001	0	0	0	0	0.0004	0.0003	0.0004	0.0006	0.0004
70	0.0017	0.0015	0.0024	0.0014	0.0026	0	0	0	0.0001	0.0001	0	0	0.0002	0	0.0002	0	0	0	0	0.0001	0	0	0	0.0002	0	0	0.0001	0	0.0001	0	0.0003	0.0004	0	0.0003	0	0.0001	0.0022	0.0001	0.0004	0.001	0	0	0	0	0.0005	0.0003	0.0004	0.0006	0.0004
71	0.0018	0.0017	0.0026	0.0015	0.0026	0	0	0	0.0001	0.0001	0	0	0.0002	0	0.0002	0	0	0	0	0.0001	0	0	0	0.0002	0	0	0.0001	0	0.0001	0	0.0003	0.0004	0	0.0003	0	0.0001	0.0021	0.0001	0.0004	0.001	0	0	0	0	0.0004	0.0003	0.0004	0.0005	0.0004
72	0.002	0.002	0.0029	0.0017	0.0028	0	0	0	0.0001	0.0001	0	0	0.0002	0	0.0002	0	0	0	0	0.0001	0	0	0	0.0002	0	0	0.0001	0	0.0001	0	0.0003	0.0004	0	0.0003	0	0.0001	0.0021	0.0001	0.0004	0.001	0	0	0	0	0.0004	0.0003	0.0004	0.0005	0.0004
73	0.0023	0.0022	0.003	0.0019	0.003	0	0	0	0.0001	0.0001	0	0	0.0002	0	0.0002	0	0	0	0	0.0001	0	0	0	0.0002	0	0	0.0001	0	0.0001	0	0.0003	0.0004	0	0.0003	0	0.0001	0.002	0.0001	0.0004	0.001	0	0	0	0	0.0004	0.0003	0.0004	0.0005	0.0004
74	0.0026	0.0024	0.0032	0.0021	0.0034	0	0	0	0.0001	0.0001	0	0	0.0002	0	0.0002	0	0	0	0	0.0001	0	0	0	0.0002	0	0	0.0001	0	0.0001	0	0.0003	0.0004	0	0.0003	0	0.0001	0.002	0.0001	0.0004	0.0009	0	0	0	0	0.0004	0.0003	0.0004	0.0005	0.0004
75	0.0028	0.0026	0.0036	0.0024	0.0036	0	0	0	0.0001	0.0001	0	0	0.0002	0	0.0002	0	0	0	0	0.0001	0	0	0	0.0002	0	0	0.0001	0	0.0001	0	0.0003	0.0004	0	0.0003	0	0.0001	0.002	0.0001	0.0004	0.0009	0	0	0	0	0.0004	0.0003	0.0004	0.0005	0.0004
76	0.0032	0.0029	0.004	0.0027	0.004	0	0	0	0.0001	0.0001	0	0	0.0002	0	0.0002	0	0	0	0	0.0001	0	0	0	0.0002	0	0	0.0001	0	0.0001	0	0.0003	0.0004	0	0.0003	0	0.0001	0.0019	0.0001	0.0004	0.0009	0	0	0	0	0.0004	0.0003	0.0004	0.0005	0.0004
77	0.0032	0.003	0.0041	0.0029	0.0042	0	0	0	0.0001	0.0001	0	0	0.0002	0	0.0002	0	0	0	0	0.0001	0	0	0	0.0002	0	0	0.0001	0	0.0001	0	0.0003	0.0004	0	0.0003	0	0.0001	0.0019	0.0001	0.0004	0.0009	0	0	0	0	0.0004	0.0003	0.0004	0.0005	0.0004
78	0.0036	0.0033	0.0044	0.003	0.0044	0	0	0	0.0001	0.0001	0	0	0.0002	0	0.0002	0	0	0	0	0.0001	0	0	0	0.0002	0	0	0.0001	0	0.0001	0	0.0003	0.0004	0	0.0003	0	0.0001	0.0018	0.0001	0.0004	0.0009	0	0	0	0	0.0004	0.0003	0.0004	0.0005	0.0004
79	0.004	0.0037	0.0048	0.0034	0.0048	0	0	0	0.0001	0.0001	0	0	0.0002	0	0.0002	0	0	0	0	0.0001	0	0	0	0.0002	0	0	0.0001	0	0.0001	0	0.0003	0.0004	0	0.0003	0	0.0001	0.0018	0.0001	0.0004	0.0008	0	0	0	0	0.0004	0.0003	0.0004	0.0005	0.0004
80	0.0044	0.0042	0.0051	0.0037	0.0052	0	0	0	0.0001	0.0001	0	0	0.0002	0	0.0002	0	0	0	0	0.0001	0	0	0	0.0002	0	0	0.0001	0	0.0001	0	0.0003	0.0004	0	0.0003	0	0.0001	0.0018	0.0001	0.0004	0.0008	0	0	0	0	0.0004	0.0003	0.0004	0.0004	0.0004
81	0.0044	0.0042	0.0054	0.0039	0.0054	0	0	0	0.0001	0.0001	0	0	0.0002	0	0.0002	0	0	0	0	0.0001	0	0	0	0.0002	0	0	0.0001	0	0.0001	0	0.0003	0.0004	0	0.0003	0	0.0001	0.0017	0.0001	0.0004	0.0008	0	0	0	0	0.0004	0.0003	0.0004	0.0004	0.0004
82	0.0049	0.0046	0.0057	0.0043	0.0058	0	0	0	0.0001	0.0001	0	0	0.0002	0	0.0002	0	0	0	0	0.0001	0	0	0	0.0002	0	0	0.0001	0	0.0001	0	0.0003	0.0004	0	0.0003	0	0.0001	0.0017	0.0001	0.0004	0.0008	0	0	0	0	0.0004	0.0003	0.0004	0.0004	0.0004
83	0.0052	0.005	0.0062	0.0046	0.0062	0	0	0	0.0001	0.0001	0	0	0.0002	0	0.0002	0	0	0	0	0.0001	0	0	0	0.0002	0	0	0.0001	0	0.0001	0	0.0003	0.0004	0	0.0003	0	0.0001	0.0017	0.0001	0.0004	0.0008	0	0	0	0	0.0004	0.0003	0.0004	0.0004	0.0004
84	0.0055	0.0053	0.0066	0.0051	0.0067	0	0	0	0.0001	0.0001	0	0	0.0002	0	0.0002	0	0	0	0	0.0001	0	0	0	0.0002	0	0	0.0001	0	0.0001	0	0.0003	0.0004	0	0.0003	0	0.0001	0.0016	0.0001	0.0004	0.0008	0	0	0	0	0.0008	0.0003	0.0004	0.0004	0.0004
85	0.0059	0.0058	0.0069	0.0055	0.0072	0	0	0	0.0001	0.0001	0	0	0.0002	0	0.0002	0	0	0	0	0.0001	0	0	0	0.0002	0	0	0.0001	0	0.0001	0	0.0003	0.0004	0	0.0003	0	0.0001	0.0016	0.0001	0.0004	0.0008	0	0	0	0	0.0004	0.0003	0.0004	0.0004	0.0004
86	0.0063	0.006	0.0072	0.0057	0.0075	0	0	0	0.0001	0.0001	0	0	0.0002	0	0.0002	0	0	0	0	0.0001	0	0	0	0.0002	0	0	0.0001	0	0.0001	0	0.0003	0.0004	0	0.0003	0	0.0001	0.0016	0.0001	0.0004	0.0007	0	0	0	0	0.0004	0.0003	0.0004	0.0004	0.0004
87	0.0067	0.0064	0.0076	0.0061	0.0078	0	0	0	0.0001	0.0001	0	0	0.0002	0	0.0002	0	0	0	0	0.0001	0	0	0	0.0002	0	0	0.0001	0	0.0001	0	0.0003	0.0004	0	0.0003	0	0.0001	0.0015	0.0001	0.0004	0.0007	0	0	0	0	0.0004	0.0003	0.0004	0.0004	0.0004
88	0.0071	0.0068	0.0082	0.0065	0.0083	0	0	0	0.0001	0.0001	0	0	0.0002	0	0.0002	0	0	0	0	0.0001	0	0	0	0.0002	0	0	0.0001	0	0.0001	0	0.0003	0.0004	0	0.0003	0	0.0001	0.0015	0.0001	0.0004	0.0007	0	0	0	0	0.0004	0.0003	0.0004	0.0004	0.0004
89	0.0075	0.0073	0.0086	0.0069	0.0087	0	0	0	0.0001	0.0001	0	0	0.0002	0	0.0002	0	0	0	0	0.0001	0	0	0	0.0002	0	0	0.0001	0	0.0001	0	0.0003	0.0004	0	0.0003	0	0.0001	0.0015	0.0001	0.0004	0.0007	0	0	0	0	0.0004	0.0003	0.0004	0.0004	0.0004
90	0.008	0.0078	0.009	0.0073	0.0091	0	0	0	0.0001	0.0001	0	0	0.0002	0	0.0002	0	0	0	0	0.0001	0	0	0	0.0002	0	0	0.0001	0	0.0001	0	0.0003	0.0004	0	0.0003	0	0.0001	0.0014	0.0001	0.0004	0.0007	0	0	0	0	0.0004	0.0003	0.0004	0.0004	0.0004
91	0.0084	0.0081	0.0093	0.0077	0.0095	0	0	0	0.0001	0.0001	0	0	0.0002	0	0.0002	0	0	0	0	0.0001	0	0	0	0.0002	0	0	0.0001	0	0.0001	0	0.0003	0.0004	0	0.0003	0	0.0001	0.0014	0.0001	0.0004	0.0007	0	0	0	0	0.0004	0.0003	0.0004	0.0004	0.0004
92	0.0089	0.0087	0.0099	0.0083	0.0102	0	0	0	0.0001	0.0001	0	0	0.0002	0	0.0002	0	0	0	0	0.0001	0	0	0	0.0002	0	0	0.0001	0	0.0001	0	0.0003	0.0004	0	0.0003	0	0.0001	0.0014	0.0001	0.0004	0.0007	0	0	0	0	0.0004	0.0003	0.0004	0.0004	0.0004
93	0.0093	0.009	0.0103	0.0087	0.0106	0	0	0	0.0001	0.0001	0	0	0.0002	0	0.0002	0	0	0	0	0.0001	0	0	0	0.0002	0	0	0.0001	0	0.0001	0	0.0003	0.0004	0	0.0003	0	0.0001	0.0014	0.0001	0.0004	0.0007	0	0	0	0	0.0004	0.0003	0.0004	0.0004	0.0004
94	0.0098	0.0095	0.0107	0.0091	0.011	0	0	0	0.0001	0.0001	0	0	0.0002	0	0.0002	0	0	0	0	0.0001	0	0	0	0.0002	0	0	0.0001	0	0.0001	0	0.0003	0.0004	0	0.0003	0	0.0001	0.0013	0.0001	0.0004	0.0006	0	0	0	0	0.0004	0.0003	0.0004	0.0004	0.0004
95	0.0104	0.01	0.0113	0.0096	0.0116	0.0001	0	0	0.0001	0.0001	0	0	0.0002	0	0.0002	0	0	0	0	0.0001	0	0	0	0.0002	0	0	0.0001	0	0.0001	0	0.0003	0.0004	0	0.0003	0	0.0001	0.0013	0.0001	0.0004	0.0006	0	0	0	0	0.0004	0.0003	0.0004	0.0004	0.0004
96	0.0108	0.0106	0.0117	0.01	0.0119	0.0001	0	0	0.0001	0.0001	0	0	0.0002	0	0.0002	0	0	0	0	0.0001	0	0	0	0.0002	0	0	0.0001	0	0.0001	0	0.0003	0.0004	0	0.0003	0	0.0001	0.0013	0.0001	0.0004	0.0006	0	0	0	0	0.0004	0.0003	0.0004	0.0004	0.0004
97	0.0113	0.0109	0.0123	0.0106	0.0125	0.0001	0	0	0.0001	0.0001	0	0	0.0002	0	0.0002	0	0	0	0	0.0001	0	0	0	0.0002	0	0	0.0001	0	0.0001	0	0.0003	0.0004	0	0.0003	0	0.0001	0.0012	0.0001	0.0004	0.0006	0	0	0	0	0.0004	0.0003	0.0004	0.0004	0.0004
98	0.0119	0.0115	0.0128	0.0111	0.013	0.0001	0	0	0.0001	0.0001	0	0	0.0002	0	0.0002	0	0	0	0	0.0001	0	0	0	0.0002	0	0	0.0001	0	0.0001	0	0.0003	0.0004	0	0.0003	0	0.0001	0.0012	0.0001	0.0004	0.0006	0	0	0	0	0.0004	0.0003	0.0004	0.0004	0.0004
99	0.0123	0.012	0.0132	0.0116	0.0135	0.0001	0	0	0.0001	0.0001	0	0	0.0002	0	0.0002	0	0	0	0	0.0001	0	0	0	0.0002	0	0	0.0001	0	0.0001	0	0.0003	0.0004	0	0.0003	0	0.0001	0.0013	0.0001	0.0004	0.0006	0	0	0	0	0.0004	0.0003	0.0004	0.0004	0.0004
100	0.0129	0.0125	0.0139	0.0121	0.0141	0.0002	0	0.0001	0.0002	0.0001	0	0	0.0002	0	0.0002	0	0	0	0	0.0001	0	0	0	0.0002	0	0	0.0001	0	0.0001	0	0.0003	0.0004	0	0.0003	0	0.0001	0.0013	0.0001	0.0004	0.0006	0	0	0	0	0.0005	0.0003	0.0004	0.0004	0.0004
101	0.0135	0.013	0.0144	0.0127	0.0147	0.0002	0	0.0001	0.0001	0.0001	0	0	0.0002	0	0.0002	0	0	0	0	0.0001	0	0	0	0.0002	0	0	0.0001	0	0.0001	0	0.0003	0.0004	0	0.0003	0	0.0001	0.0012	0.0001	0.0004	0.0006	0	0	0	0	0.0004	0.0003	0.0004	0.0004	0.0004
102	0.014	0.0136	0.0151	0.0132	0.0152	0.0002	0	0.0001	0.0001	0.0001	0	0	0.0002	0	0.0002	0	0	0	0	0.0001	0	0	0	0.0002	0	0	0.0001	0	0.0001	0	0.0003	0.0004	0	0.0003	0	0.0001	0.0012	0.0001	0.0004	0.0005	0	0	0	0	0.0004	0.0003	0.0004	0.0004	0.0004
103	0.0146	0.0142	0.0157	0.0138	0.0159	0.0004	0	0.0002	0.0002	0.0001	0	0	0.0002	0	0.0002	0	0	0	0	0.0001	0	0	0	0.0002	0	0	0.0001	0	0.0001	0	0.0003	0.0004	0	0.0003	0	0.0001	0.0011	0.0001	0.0004	0.0005	0	0	0	0	0.0004	0.0003	0.0004	0.0004	0.0004
104	0.0152	0.0148	0.0163	0.0144	0.0165	0.0003	0	0.0002	0.0001	0.0001	0	0	0.0002	0	0.0002	0	0	0	0	0.0001	0	0	0	0.0002	0	0	0.0001	0	0.0001	0	0.0003	0.0004	0	0.0003	0	0.0001	0.0011	0.0001	0.0004	0.0005	0	0	0	0	0.0004	0.0003	0.0004	0.0004	0.0004
105	0.0158	0.0155	0.0168	0.015	0.0171	0.0004	0	0.0002	0.0002	0.0001	0	0	0.0002	0	0.0002	0	0	0	0	0.0001	0	0	0	0.0002	0	0	0.0001	0	0.0001	0	0.0003	0.0004	0	0.0003	0	0.0001	0.0011	0.0001	0.0004	0.0005	0	0	0	0	0.0004	0.0003	0.0004	0.0004	0.0004
106	0.0165	0.016	0.0177	0.0157	0.0178	0.0005	0.0001	0.0003	0.0003	0.0001	0	0	0.0002	0	0.0002	0	0	0	0	0.0001	0	0	0	0.0002	0	0	0.0001	0	0.0001	0	0.0003	0.0004	0	0.0003	0	0.0001	0.0011	0.0001	0.0004	0.0005	0	0	0	0	0.0004	0.0003	0.0004	0.0004	0.0004
107	0.0171	0.0166	0.0182	0.0163	0.0185	0.0006	0.0001	0.0003	0.0003	0.0001	0	0	0.0002	0	0.0002	0	0	0	0	0.0001	0	0	0	0.0002	0	0	0.0001	0	0.0001	0	0.0003	0.0004	0	0.0003	0	0.0001	0.0011	0.0001	0.0004	0.0005	0	0	0	0	0.0004	0.0003	0.0004	0.0004	0.0004
108	0.0176	0.0171	0.0188	0.0169	0.019	0.0005	0	0.0004	0.0003	0.0001	0	0	0.0002	0	0.0002	0	0	0	0	0.0001	0	0	0	0.0002	0	0	0.0001	0	0.0001	0	0.0003	0.0004	0	0.0003	0	0.0001	0.0011	0.0001	0.0004	0.0005	0	0	0	0	0.0004	0.0003	0.0004	0.0004	0.0004
109	0.0183	0.0177	0.0192	0.0175	0.0197	0.0006	0	0.0003	0.0002	0.0001	0	0	0.0002	0	0.0002	0	0	0	0	0.0001	0	0	0	0.0002	0	0	0.0001	0	0.0001	0	0.0003	0.0004	0	0.0003	0	0.0001	0.001	0.0001	0.0004	0.0005	0	0	0	0	0.0004	0.0003	0.0004	0.0004	0.0004
110	0.019	0.0186	0.02	0.0181	0.0204	0.0007	0.0001	0.0005	0.0003	0.0003	0	0	0.0002	0	0.0002	0	0	0	0	0.0001	0	0	0	0.0002	0	0	0.0001	0	0.0001	0	0.0003	0.0004	0	0.0003	0	0.0001	0.001	0.0001	0.0004	0.0005	0	0	0	0	0.0004	0.0003	0.0004	0.0004	0.0004
111	0.0197	0.0193	0.0208	0.0189	0.0211	0.0006	0.0001	0.0005	0.0004	0.0003	0	0	0.0002	0	0.0002	0	0	0	0	0.0001	0	0	0	0.0002	0	0	0.0001	0	0.0001	0	0.0003	0.0004	0	0.0003	0	0.0001	0.001	0.0001	0.0004	0.0004	0	0	0	0	0.0004	0.0003	0.0004	0.0004	0.0004
112	0.0204	0.0199	0.0215	0.0197	0.0219	0.0008	0.0001	0.0005	0.0004	0.0003	0	0	0.0002	0	0.0002	0	0	0	0	0.0001	0	0	0	0.0002	0	0	0.0001	0	0.0001	0	0.0003	0.0004	0	0.0003	0	0.0001	0.001	0.0001	0.0004	0.0004	0	0	0	0	0.0004	0.0003	0.0004	0.0004	0.0004
113	0.0208	0.0204	0.022	0.0201	0.0223	0.0008	0.0002	0.0005	0.0004	0.0001	0	0	0.0002	0	0.0002	0	0	0	0	0.0001	0	0	0	0.0002	0	0	0.0001	0	0.0001	0	0.0003	0.0004	0	0.0003	0	0.0001	0.001	0.0001	0.0004	0.0004	0	0	0	0	0.0004	0.0003	0.0004	0.0004	0.0004
114	0.0215	0.021	0.0228	0.0209	0.0231	0.001	0.0002	0.0006	0.0005	0.0003	0	0	0.0002	0	0.0002	0	0	0	0	0.0001	0	0	0	0.0002	0	0	0.0001	0	0.0001	0	0.0003	0.0004	0	0.0003	0	0.0001	0.0009	0.0001	0.0004	0.0004	0	0	0	0	0.0004	0.0003	0.0004	0.0004	0.0004
115	0.0224	0.0217	0.0235	0.0215	0.0238	0.0011	0.0004	0.0007	0.0006	0.0004	0	0	0.0002	0	0.0002	0	0	0	0	0.0001	0	0	0	0.0002	0	0	0.0001	0	0.0001	0	0.0003	0.0004	0	0.0003	0	0.0001	0.0009	0.0001	0.0004	0.0004	0	0	0	0	0.0004	0.0003	0.0004	0.0004	0.0004
116	0.0231	0.0224	0.0243	0.0222	0.0245	0.0011	0.0003	0.0008	0.0006	0.0004	0	0	0.0002	0	0.0002	0	0	0	0	0.0001	0	0	0	0.0002	0	0	0.0001	0	0.0001	0	0.0003	0.0004	0	0.0003	0	0.0001	0.0009	0.0001	0.0004	0.0004	0	0	0	0	0.0004	0.0003	0.0004	0.0004	0.0004
117	0.0236	0.0231	0.0249	0.023	0.0253	0.0013	0.0004	0.0009	0.0007	0.0004	0	0	0.0002	0	0.0002	0	0	0	0	0.0001	0	0	0	0.0002	0	0	0.0001	0	0.0001	0	0.0003	0.0004	0	0.0003	0	0.0001	0.0009	0.0001	0.0004	0.0004	0	0	0	0	0.0004	0.0003	0.0004	0.0004	0.0004
118	0.0246	0.0238	0.0257	0.0238	0.0261	0.0014	0.0005	0.001	0.0008	0.0004	0	0	0.0002	0	0.0002	0	0	0	0	0.0001	0	0	0	0.0002	0	0	0.0001	0	0.0001	0	0.0003	0.0004	0	0.0003	0	0.0001	0.0009	0.0001	0.0004	0.0004	0	0	0	0	0.0004	0.0003	0.0004	0.0004	0.0004
119	0.0253	0.0245	0.0264	0.0245	0.0267	0.0015	0.0006	0.001	0.0008	0.0007	0	0	0.0002	0	0.0002	0	0	0	0	0.0001	0	0	0	0.0002	0	0	0.0001	0	0.0001	0	0.0003	0.0004	0	0.0003	0	0.0001	0.0008	0.0001	0.0004	0.0004	0	0	0	0	0.0004	0.0003	0.0004	0.0004	0.0004
120	0.026	0.0254	0.0272	0.0252	0.0276	0.0015	0.0007	0.0011	0.0009	0.0007	0	0	0.0002	0	0.0002	0	0	0	0	0.0001	0	0	0	0.0002	0	0	0.0001	0	0.0001	0	0.0003	0.0004	0	0.0003	0	0.0001	0.0008	0.0001	0.0004	0.0004	0	0	0	0	0.0004	0.0003	0.0004	0.0004	0.0004
121	0.0268	0.0261	0.0279	0.026	0.0284	0.0017	0.0008	0.0012	0.0009	0.0008	0	0	0.0002	0	0.0002	0	0	0	0	0.0001	0	0	0	0.0002	0	0	0.0001	0	0.0001	0	0.0003	0.0004	0	0.0003	0	0.0001	0.0008	0.0001	0.0004	0.0004	0	0	0	0	0.0004	0.0003	0.0004	0.0004	0.0004
122	0.0276	0.0268	0.0288	0.0267	0.0291	0.0016	0.0008	0.0012	0.001	0.0008	0	0	0.0002	0	0.0002	0	0	0	0	0.0001	0	0	0	0.0002	0	0	0.0001	0	0.0001	0	0.0003	0.0004	0	0.0003	0	0.0001	0.0008	0.0001	0.0004	0.0004	0	0	0	0	0.0004	0.0003	0.0004	0.0004	0.0004
123	0.0283	0.0275	0.0295	0.0277	0.0299	0.0019	0.0009	0.0013	0.0011	0.001	0	0	0.0002	0	0.0002	0	0	0	0	0.0001	0	0	0	0.0002	0	0	0.0001	0	0.0001	0	0.0003	0.0004	0	0.0003	0	0.0001	0.0008	0.0001	0.0004	0.0004	0	0	0	0	0.0004	0.0003	0.0004	0.0004	0.0004
124	0.0292	0.0282	0.0305	0.0285	0.0307	0.002	0.001	0.0015	0.0012	0.001	0	0	0.0002	0	0.0002	0	0	0	0	0.0001	0	0	0	0.0002	0	0	0.0001	0	0.0001	0	0.0003	0.0004	0	0.0003	0	0.0001	0.0008	0.0001	0.0004	0.0004	0	0	0	0	0.0004	0.0003	0.0004	0.0004	0.0004
125	0.03	0.0293	0.0313	0.0294	0.0317	0.0021	0.0011	0.0017	0.0013	0.0011	0	0	0.0002	0	0.0002	0	0	0	0	0.0001	0	0	0	0.0002	0	0	0.0001	0	0.0001	0	0.0003	0.0004	0	0.0003	0	0.0001	0.0008	0.0001	0.0004	0.0004	0	0	0	0	0.0004	0.0003	0.0004	0.0004	0.0004
126	0.031	0.03	0.0321	0.0302	0.0325	0.0022	0.0012	0.0017	0.0013	0.0012	0	0	0.0002	0	0.0002	0	0	0	0	0.0001	0	0	0	0.0002	0	0	0.0001	0	0.0001	0	0.0003	0.0004	0	0.0003	0	0.0001	0.0007	0.0001	0.0004	0.0004	0	0	0	0	0.0004	0.0003	0.0004	0.0004	0.0004
127	0.0319	0.0309	0.0331	0.0312	0.0336	0.0023	0.0013	0.0019	0.0016	0.0013	0	0	0.0002	0	0.0002	0	0	0	0	0.0001	0	0	0	0.0002	0	0	0.0001	0	0.0001	0	0.0003	0.0004	0	0.0003	0	0.0001	0.0007	0.0001	0.0004	0.0004	0	0	0	0	0.0004	0.0003	0.0004	0.0004	0.0004
128	0.0326	0.0315	0.0337	0.0318	0.0342	0.0024	0.0014	0.0018	0.0015	0.0013	0	0	0.0002	0	0.0002	0	0	0	0	0.0001	0	0	0	0.0002	0	0	0.0001	0	0.0001	0	0.0003	0.0004	0	0.0003	0	0.0001	0.0007	0.0001	0.0004	0.0004	0	0	0	0	0.0004	0.0003	0.0004	0.0004	0.0004
129	0.0334	0.0324	0.0346	0.0327	0.0351	0.0025	0.0016	0.002	0.0016	0.0015	0	0	0.0002	0	0.0002	0	0	0	0	0.0001	0	0	0	0.0002	0	0	0.0001	0	0.0001	0	0.0003	0.0004	0	0.0003	0	0.0001	0.0007	0.0001	0.0004	0.0004	0	0	0	0	0.0004	0.0003	0.0004	0.0004	0.0004
130	0.0342	0.0332	0.0356	0.0337	0.036	0.0026	0.0016	0.0021	0.0017	0.0015	0	0	0.0002	0	0.0002	0	0	0	0	0.0001	0	0	0	0.0002	0	0	0.0001	0	0.0001	0	0.0003	0.0004	0	0.0003	0	0.0001	0.0007	0.0001	0.0004	0.0004	0	0	0	0	0.0004	0.0003	0.0004	0.0004	0.0004
131	0.0352	0.0342	0.0364	0.0346	0.037	0.0026	0.0017	0.0022	0.0017	0.0016	0	0	0.0002	0	0.0002	0	0	0	0	0.0001	0	0	0	0.0002	0	0	0.0001	0	0.0001	0	0.0003	0.0004	0	0.0003	0	0.0001	0.0007	0.0001	0.0004	0.0004	0	0	0	0	0.0004	0.0003	0.0004	0.0004	0.0004
132	0.036	0.035	0.0374	0.0355	0.0378	0.0029	0.0018	0.0023	0.002	0.0017	0	0	0.0002	0	0.0002	0	0	0	0	0.0001	0	0	0	0.0002	0	0	0.0001	0	0.0001	0	0.0003	0.0004	0	0.0003	0	0.0001	0.0007	0.0001	0.0004	0.0004	0	0	0	0	0.0004	0.0003	0.0004	0.0004	0.0004
133	0.0372	0.0359	0.0384	0.0365	0.039	0.003	0.0021	0.0024	0.002	0.0019	0	0	0.0002	0	0.0002	0	0	0	0	0.0001	0	0	0	0.0002	0	0	0.0001	0	0.0001	0	0.0003	0.0004	0	0.0003	0	0.0001	0.0007	0.0001	0.0004	0.0004	0	0	0	0	0.0004	0.0003	0.0004	0.0004	0.0004
134	0.0381	0.0367	0.0393	0.0374	0.0399	0.0032	0.0022	0.0027	0.0022	0.002	0	0	0.0002	0	0.0002	0	0	0	0	0.0001	0	0	0	0.0002	0	0	0.0001	0	0.0001	0	0.0003	0.0004	0	0.0003	0	0.0001	0.0006	0.0001	0.0004	0.0004	0	0	0	0	0.0004	0.0003	0.0004	0.0004	0.0004
135	0.0391	0.0377	0.0403	0.0384	0.0409	0.0033	0.0023	0.0028	0.0023	0.002	0	0	0.0002	0	0.0002	0	0	0	0	0.0001	0	0	0	0.0002	0	0	0.0001	0	0.0001	0	0.0003	0.0004	0	0.0003	0	0.0001	0.0006	0.0001	0.0004	0.0004	0	0	0	0	0.0004	0.0003	0.0004	0.0004	0.0004
136	0.04	0.0385	0.0413	0.0393	0.0417	0.0034	0.0024	0.0029	0.0024	0.0022	0	0	0.0002	0	0.0002	0	0	0	0	0.0001	0	0	0	0.0002	0	0	0.0001	0	0.0001	0	0.0003	0.0004	0	0.0003	0	0.0001	0.0006	0.0001	0.0004	0.0004	0	0	0	0	0.0004	0.0003	0.0004	0.0004	0.0004
137	0.041	0.0396	0.0422	0.0404	0.0428	0.0035	0.0025	0.003	0.0025	0.0022	0	0	0.0002	0	0.0002	0	0	0	0	0.0001	0	0	0	0.0002	0	0	0.0001	0	0.0001	0	0.0003	0.0004	0	0.0003	0	0.0001	0.0006	0.0001	0.0004	0.0004	0	0	0	0	0.0004	0.0003	0.0004	0.0004	0.0004
138	0.042	0.0405	0.0432	0.0413	0.0439	0.0037	0.0028	0.0032	0.0026	0.0025	0	0	0.0002	0	0.0002	0	0	0	0	0.0001	0	0	0	0.0002	0	0	0.0001	0	0.0001	0	0.0003	0.0004	0	0.0003	0	0.0001	0.0006	0.0001	0.0004	0.0004	0	0	0	0	0.0004	0.0003	0.0004	0.0004	0.0004
139	0.043	0.0414	0.0443	0.0423	0.0449	0.0038	0.0029	0.0034	0.0028	0.0026	0	0	0.0002	0	0.0002	0	0	0	0	0.0001	0	0	0	0.0002	0	0	0.0001	0	0.0001	0	0.0003	0.0004	0	0.0003	0	0.0001	0.0006	0.0001	0.0004	0.0004	0	0	0	0	0.0004	0.0003	0.0004	0.0004	0.0004
140	0.044	0.0426	0.0452	0.0433	0.0458	0.004	0.003	0.0035	0.0029	0.0027	0	0	0.0002	0	0.0002	0	0	0	0	0.0001	0	0	0	0.0002	0	0	0.0001	0	0.0001	0	0.0003	0.0004	0	0.0003	0	0.0001	0.0006	0.0001	0.0004	0.0004	0	0	0	0	0.0004	0.0003	0.0004	0.0004	0.0004
141	0.045	0.0434	0.0462	0.0443	0.0468	0.0041	0.0031	0.0036	0.003	0.0028	0	0	0.0002	0	0.0002	0	0	0	0	0.0001	0	0	0	0.0002	0	0	0.0001	0	0.0001	0	0.0003	0.0004	0	0.0003	0	0.0001	0.0006	0.0001	0.0004	0.0004	0	0	0	0	0.0004	0.0003	0.0004	0.0004	0.0004
142	0.0461	0.0444	0.0473	0.0454	0.048	0.0043	0.0034	0.0037	0.0033	0.0029	0	0	0.0002	0	0.0002	0	0	0	0	0.0001	0	0	0	0.0002	0	0	0.0001	0	0.0001	0	0.0003	0.0004	0	0.0003	0	0.0001	0.0005	0.0001	0.0004	0.0004	0	0	0	0	0.0004	0.0003	0.0004	0.0004	0.0004
143	0.0472	0.0455	0.0485	0.0465	0.049	0.0044	0.0035	0.0039	0.0033	0.003	0	0	0.0002	0	0.0002	0	0	0	0	0.0001	0	0	0	0.0002	0	0	0.0001	0	0.0001	0	0.0003	0.0004	0	0.0003	0	0.0001	0.0005	0.0001	0.0004	0.0004	0	0	0	0	0.0004	0.0003	0.0004	0.0004	0.0004
144	0.0484	0.0465	0.0495	0.0475	0.0502	0.0047	0.0037	0.0041	0.0035	0.0032	0	0	0.0002	0	0.0002	0	0	0	0	0.0001	0	0	0	0.0002	0	0	0.0001	0	0.0001	0	0.0003	0.0004	0	0.0003	0	0.0001	0.0005	0.0001	0.0004	0.0004	0	0	0	0	0.0004	0.0003	0.0004	0.0004	0.0004
145	0.0494	0.0476	0.0505	0.0487	0.0512	0.0048	0.0039	0.0043	0.0037	0.0034	0	0	0.0002	0	0.0002	0	0	0	0	0.0001	0	0	0	0.0002	0	0	0.0001	0	0.0001	0	0.0003	0.0004	0	0.0003	0	0.0001	0.0005	0.0001	0.0004	0.0004	0	0	0	0	0.0004	0.0003	0.0004	0.0004	0.0004
146	0.0505	0.0484	0.0517	0.0497	0.0524	0.005	0.0041	0.0045	0.0038	0.0036	0	0	0.0002	0	0.0002	0	0	0	0	0.0001	0	0	0	0.0002	0	0	0.0001	0	0.0001	0	0.0003	0.0004	0	0.0003	0	0.0001	0.0005	0.0001	0.0004	0.0004	0	0	0	0	0.0004	0.0003	0.0004	0.0004	0.0004
147	0.0517	0.0496	0.0529	0.0509	0.0536	0.0053	0.0043	0.0046	0.0041	0.0036	0	0	0.0002	0	0.0002	0	0	0	0	0.0001	0	0	0	0.0002	0	0	0.0001	0	0.0001	0	0.0003	0.0004	0	0.0003	0	0.0001	0.0005	0.0001	0.0004	0.0004	0	0	0	0	0.0004	0.0003	0.0004	0.0004	0.0004
148	0.0527	0.0507	0.054	0.052	0.0547	0.0053	0.0044	0.0048	0.0042	0.0039	0	0	0.0002	0	0.0002	0	0	0	0	0.0001	0	0	0	0.0002	0	0	0.0001	0	0.0001	0	0.0003	0.0004	0	0.0003	0	0.0001	0.0005	0.0001	0.0004	0.0004	0	0	0	0	0.0004	0.0003	0.0004	0.0004	0.0004
149	0.0539	0.0518	0.0551	0.0531	0.0558	0.0055	0.0046	0.005	0.0044	0.004	0	0	0.0002	0	0.0002	0	0	0	0	0.0001	0	0	0	0.0002	0	0	0.0001	0	0.0001	0	0.0003	0.0004	0	0.0003	0	0.0001	0.0005	0.0001	0.0004	0.0004	0	0	0	0	0.0004	0.0003	0.0004	0.0004	0.0004
150	0.0552	0.0531	0.0563	0.0543	0.0569	0.0058	0.0048	0.0051	0.0045	0.0041	0	0	0.0002	0	0.0002	0	0	0	0	0.0001	0	0	0	0.0002	0	0	0.0001	0	0.0001	0	0.0003	0.0004	0	0.0003	0	0.0001	0.0005	0.0001	0.0004	0.0004	0	0	0	0	0.0004	0.0003	0.0004	0.0004	0.0004
151	0.0564	0.0541	0.0576	0.0556	0.0584	0.006	0.0052	0.0054	0.0048	0.0043	0	0	0.0002	0	0.0002	0	0	0	0	0.0001	0	0	0	0.0002	0	0	0.0001	0	0.0001	0	0.0003	0.0004	0	0.0003	0	0.0001	0.0004	0.0001	0.0004	0.0004	0	0	0	0	0.0004	0.0003	0.0004	0.0004	0.0004
152	0.0575	0.0553	0.0587	0.0566	0.0595	0.0061	0.0054	0.0057	0.005	0.0046	0	0	0.0002	0	0.0002	0	0	0	0	0.0001	0	0	0	0.0002	0	0	0.0001	0	0.0001	0	0.0003	0.0004	0	0.0003	0	0.0001	0.0004	0.0001	0.0004	0.0004	0	0	0	0	0.0004	0.0003	0.0004	0.0004	0.0004
153	0.0588	0.0565	0.0599	0.058	0.0606	0.0063	0.0055	0.0058	0.0052	0.0047	0	0	0.0002	0	0.0002	0	0	0	0	0.0001	0	0	0	0.0002	0	0	0.0001	0	0.0001	0	0.0003	0.0004	0	0.0003	0	0.0001	0.0004	0.0001	0.0004	0.0004	0	0	0	0	0.0004	0.0003	0.0004	0.0004	0.0004
154	0.0602	0.0577	0.0613	0.0595	0.0621	0.0066	0.0057	0.006	0.0054	0.0049	0	0	0.0002	0	0.0002	0	0	0	0	0.0001	0	0	0	0.0002	0	0	0.0001	0	0.0001	0	0.0003	0.0004	0	0.0003	0	0.0001	0.0004	0.0001	0.0004	0.0004	0	0	0	0	0.0004	0.0003	0.0004	0.0004	0.0004
155	0.0614	0.0589	0.0626	0.0606	0.0633	0.0067	0.006	0.0062	0.0057	0.0051	0	0	0.0002	0	0.0002	0	0	0	0	0.0001	0	0	0	0.0002	0	0	0.0001	0	0.0001	0	0.0003	0.0004	0	0.0003	0	0.0001	0.0004	0.0001	0.0004	0.0004	0	0	0	0	0.0004	0.0003	0.0004	0.0004	0.0004
156	0.0627	0.0603	0.0638	0.0618	0.0645	0.0071	0.0062	0.0065	0.0058	0.0053	0	0	0.0002	0	0.0002	0	0	0	0	0.0001	0	0	0	0.0002	0	0	0.0001	0	0.0001	0	0.0003	0.0004	0	0.0003	0	0.0001	0.0004	0.0001	0.0004	0.0004	0	0	0	0	0.0004	0.0003	0.0004	0.0004	0.0004
157	0.064	0.0613	0.0651	0.063	0.0658	0.0072	0.0063	0.0066	0.006	0.0053	0	0	0.0002	0	0.0002	0	0	0	0	0.0001	0	0	0	0.0002	0	0	0.0001	0	0.0001	0	0.0003	0.0004	0	0.0003	0	0.0001	0.0004	0.0001	0.0004	0.0004	0	0	0	0	0.0004	0.0003	0.0004	0.0004	0.0004
158	0.0654	0.0628	0.0665	0.0645	0.0671	0.0075	0.0066	0.0069	0.0063	0.0056	0	0	0.0002	0	0.0002	0	0	0	0	0.0001	0	0	0	0.0002	0	0	0.0001	0	0.0001	0	0.0003	0.0004	0	0.0003	0	0.0001	0.0004	0.0001	0.0004	0.0004	0	0	0	0	0.0004	0.0003	0.0004	0.0004	0.0004
159	0.0667	0.064	0.0678	0.0658	0.0685	0.0076	0.0069	0.007	0.0065	0.0059	0	0	0.0002	0	0.0002	0	0	0	0	0.0001	0	0	0	0.0002	0	0	0.0001	0	0.0001	0	0.0003	0.0004	0	0.0003	0	0.0001	0.0004	0.0001	0.0004	0.0004	0	0	0	0	0.0004	0.0003	0.0004	0.0004	0.0004
160	0.068	0.0653	0.069	0.067	0.0698	0.008	0.0072	0.0072	0.0067	0.006	0	0	0.0002	0	0.0002	0	0	0	0	0.0001	0	0	0	0.0002	0	0	0.0001	0	0.0001	0	0.0003	0.0004	0	0.0003	0	0.0001	0.0004	0.0001	0.0004	0.0004	0	0	0	0	0.0004	0.0003	0.0004	0.0004	0.0004
161	0.0696	0.0665	0.0704	0.0684	0.071	0.0083	0.0075	0.0075	0.0071	0.0063	0	0	0.0002	0	0.0002	0	0	0	0	0.0001	0	0	0	0.0002	0	0	0.0001	0	0.0001	0	0.0003	0.0004	0	0.0003	0	0.0001	0.0004	0.0001	0.0004	0.0004	0	0	0	0	0.0004	0.0003	0.0004	0.0004	0.0004
162	0.0707	0.0677	0.0716	0.0697	0.0723	0.0085	0.0077	0.0077	0.0072	0.0065	0	0	0.0002	0	0.0002	0	0	0	0	0.0001	0	0	0	0.0002	0	0	0.0001	0	0.0001	0	0.0003	0.0004	0	0.0003	0	0.0001	0.0004	0.0001	0.0004	0.0004	0	0	0	0	0.0004	0.0003	0.0004	0.0004	0.0004
163	0.0724	0.0693	0.0732	0.0713	0.0737	0.0088	0.0079	0.008	0.0075	0.0066	0	0	0.0002	0	0.0002	0	0	0	0	0.0001	0	0	0	0.0002	0	0	0.0001	0	0.0001	0	0.0003	0.0004	0	0.0003	0	0.0001	0.0004	0.0001	0.0004	0.0004	0	0	0	0	0.0004	0.0003	0.0004	0.0004	0.0004
164	0.0737	0.0705	0.0746	0.0726	0.0752	0.009	0.0082	0.0082	0.0076	0.0069	0	0	0.0002	0	0.0002	0	0	0	0	0.0001	0	0	0	0.0002	0	0	0.0001	0	0.0001	0	0.0003	0.0004	0	0.0003	0	0.0001	0.0004	0.0001	0.0004	0.0004	0	0	0	0	0.0004	0.0003	0.0004	0.0004	0.0004
165	0.0752	0.0718	0.076	0.074	0.0766	0.0092	0.0084	0.0085	0.0079	0.0071	0	0	0.0002	0	0.0002	0	0	0	0	0.0001	0	0	0	0.0002	0	0	0.0001	0	0.0001	0	0.0003	0.0004	0	0.0003	0	0.0001	0.0004	0.0001	0.0004	0.0004	0	0	0	0	0.0004	0.0003	0.0004	0.0004	0.0004
166	0.0768	0.0733	0.0774	0.0755	0.078	0.0096	0.0087	0.0087	0.0082	0.0074	0	0	0.0002	0	0.0002	0	0	0	0	0.0001	0	0	0	0.0002	0	0	0.0001	0	0.0001	0	0.0003	0.0004	0	0.0003	0	0.0001	0.0004	0.0001	0.0004	0.0004	0	0	0	0	0.0004	0.0003	0.0004	0.0004	0.0004
167	0.0782	0.0746	0.0789	0.0769	0.0794	0.0098	0.009	0.009	0.0084	0.0076	0	0	0.0002	0	0.0002	0	0	0	0	0.0001	0	0	0	0.0002	0	0	0.0001	0	0.0001	0	0.0003	0.0004	0	0.0003	0	0.0001	0.0004	0.0001	0.0004	0.0004	0	0	0	0	0.0004	0.0003	0.0004	0.0004	0.0004
168	0.0796	0.0758	0.0804	0.0783	0.0809	0.01	0.0093	0.0093	0.0086	0.0079	0	0	0.0002	0	0.0002	0	0	0	0	0.0001	0	0	0	0.0002	0	0	0.0001	0	0.0001	0	0.0003	0.0004	0	0.0003	0	0.0001	0.0004	0.0001	0.0004	0.0004	0	0	0	0	0.0004	0.0003	0.0004	0.0004	0.0004
169	0.081	0.0774	0.0817	0.0797	0.0823	0.0104	0.0095	0.0094	0.0089	0.0081	0	0	0.0002	0	0.0002	0	0	0	0	0.0001	0	0	0	0.0002	0	0	0.0001	0	0.0001	0	0.0003	0.0004	0	0.0003	0	0.0001	0.0004	0.0001	0.0004	0.0004	0	0	0	0	0.0004	0.0003	0.0004	0.0004	0.0004
170	0.0825	0.0787	0.0832	0.0814	0.0837	0.0106	0.0097	0.0098	0.0092	0.0083	0	0	0.0002	0	0.0002	0	0	0	0	0.0001	0	0	0	0.0002	0	0	0.0001	0	0.0001	0	0.0003	0.0004	0	0.0003	0	0.0001	0.0004	0.0001	0.0004	0.0004	0	0	0	0	0.0004	0.0003	0.0004	0.0004	0.0004
171	0.0842	0.0803	0.0848	0.0829	0.0852	0.0109	0.01	0.01	0.0095	0.0085	0	0	0.0002	0	0.0002	0	0	0	0	0.0001	0	0	0	0.0002	0	0	0.0001	0	0.0001	0	0.0003	0.0004	0	0.0003	0	0.0001	0.0004	0.0001	0.0004	0.0004	0	0	0	0	0.0004	0.0003	0.0004	0.0004	0.0004
172	0.0855	0.0817	0.0864	0.0844	0.0869	0.0112	0.0104	0.0104	0.0098	0.0088	0	0	0.0002	0	0.0002	0	0	0	0	0.0001	0	0	0	0.0002	0	0	0.0001	0	0.0001	0	0.0003	0.0004	0	0.0003	0	0.0001	0.0004	0.0001	0.0004	0.0004	0	0	0	0	0.0004	0.0003	0.0004	0.0004	0.0004
173	0.087	0.0831	0.0879	0.086	0.0884	0.0114	0.0106	0.0107	0.0101	0.0091	0	0	0.0002	0	0.0002	0	0	0	0	0.0001	0	0	0	0.0002	0	0	0.0001	0	0.0001	0	0.0003	0.0004	0	0.0003	0	0.0001	0.0004	0.0001	0.0004	0.0004	0	0	0	0	0.0004	0.0003	0.0004	0.0004	0.0004
174	0.0886	0.0846	0.0894	0.0874	0.0899	0.0118	0.0109	0.0109	0.0102	0.0093	0	0	0.0002	0	0.0002	0	0	0	0	0.0001	0	0	0	0.0002	0	0	0.0001	0	0.0001	0	0.0003	0.0004	0	0.0003	0	0.0001	0.0004	0.0001	0.0004	0.0004	0	0	0	0	0.0004	0.0003	0.0004	0.0004	0.0004
175	0.0902	0.086	0.0909	0.089	0.0913	0.012	0.0112	0.0111	0.0106	0.0095	0	0	0.0002	0	0.0002	0	0	0	0	0.0001	0	0	0	0.0002	0	0	0.0001	0	0.0001	0	0.0003	0.0004	0	0.0003	0	0.0001	0.0004	0.0001	0.0004	0.0004	0	0	0	0	0.0004	0.0003	0.0004	0.0004	0.0004
176	0.0918	0.0875	0.0925	0.0905	0.0929	0.0123	0.0115	0.0114	0.0109	0.0098	0	0	0.0002	0	0.0002	0	0	0	0	0.0001	0	0	0	0.0002	0	0	0.0001	0	0.0001	0	0.0003	0.0004	0	0.0003	0	0.0001	0.0004	0.0001	0.0004	0.0004	0	0	0	0	0.0004	0.0003	0.0004	0.0004	0.0004
177	0.0936	0.0891	0.0942	0.0922	0.0945	0.0125	0.0118	0.0118	0.0111	0.0101	0	0	0.0002	0	0.0002	0	0	0	0	0.0001	0	0	0	0.0002	0	0	0.0001	0	0.0001	0	0.0003	0.0004	0	0.0003	0	0.0001	0.0004	0.0001	0.0004	0.0004	0	0	0	0	0.0004	0.0003	0.0004	0.0004	0.0004
178	0.0952	0.0906	0.0957	0.0939	0.0961	0.0129	0.012	0.012	0.0113	0.0104	0	0	0.0002	0	0.0002	0	0	0	0	0.0001	0	0	0	0.0002	0	0	0.0001	0	0.0001	0	0.0003	0.0004	0	0.0003	0	0.0001	0.0004	0.0001	0.0004	0.0004	0	0	0	0	0.0004	0.0003	0.0004	0.0004	0.0004
179	0.0969	0.0924	0.0974	0.0955	0.0978	0.0132	0.0122	0.0122	0.0116	0.0105	0	0	0.0002	0	0.0002	0	0	0	0	0.0001	0	0	0	0.0002	0	0	0.0001	0	0.0001	0	0.0003	0.0004	0	0.0003	0	0.0001	0.0004	0.0001	0.0004	0.0004	0	0	0	0	0.0004	0.0003	0.0004	0.0004	0.0004
180	0.0985	0.0938	0.0991	0.0972	0.0993	0.0135	0.0126	0.0126	0.0119	0.0108	0	0	0.0002	0	0.0002	0	0	0	0	0.0001	0	0	0	0.0002	0	0	0.0001	0	0.0001	0	0.0003	0.0004	0	0.0003	0	0.0001	0.0004	0.0001	0.0004	0.0004	0	0	0	0	0.0004	0.0003	0.0004	0.0004	0.0004
181	0.1001	0.0956	0.1009	0.0988	0.1009	0.0138	0.0128	0.0129	0.0122	0.0112	0	0	0.0002	0	0.0002	0	0	0	0	0.0001	0	0	0	0.0002	0	0	0.0001	0	0.0001	0	0.0003	0.0004	0	0.0003	0	0.0001	0.0004	0.0001	0.0004	0.0004	0	0	0	0	0.0004	0.0003	0.0004	0.0004	0.0004
182	0.1019	0.097	0.1025	0.1004	0.1027	0.014	0.0131	0.0132	0.0124	0.0114	0	0	0.0002	0	0.0002	0	0	0	0	0.0001	0	0	0	0.0002	0	0	0.0001	0	0.0001	0	0.0003	0.0004	0	0.0003	0	0.0001	0.0004	0.0001	0.0004	0.0004	0	0	0	0	0.0004	0.0003	0.0004	0.0004	0.0004
183	0.1037	0.0984	0.1041	0.1022	0.1043	0.0143	0.0134	0.0135	0.0129	0.0116	0	0	0.0002	0	0.0002	0	0	0	0	0.0001	0	0	0	0.0002	0	0	0.0001	0	0.0001	0	0.0003	0.0004	0	0.0003	0	0.0001	0.0004	0.0001	0.0004	0.0004	0	0	0	0	0.0004	0.0003	0.0004	0.0004	0.0004
184	0.1051	0.1	0.1057	0.1038	0.106	0.0147	0.0137	0.0137	0.0131	0.012	0	0	0.0002	0	0.0002	0	0	0	0	0.0001	0	0	0	0.0002	0	0	0.0001	0	0.0001	0	0.0003	0.0004	0	0.0003	0	0.0001	0.0004	0.0001	0.0004	0.0004	0	0	0	0	0.0004	0.0003	0.0004	0.0004	0.0004
185	0.1069	0.1018	0.1075	0.1054	0.1077	0.0151	0.0141	0.014	0.0134	0.0123	0	0	0.0002	0	0.0002	0	0	0	0	0.0001	0	0	0	0.0002	0	0	0.0001	0	0.0001	0	0.0003	0.0004	0	0.0003	0	0.0001	0.0004	0.0001	0.0004	0.0004	0	0	0	0	0.0004	0.0003	0.0004	0.0004	0.0004
186	0.1086	0.1036	0.1094	0.1072	0.1094	0.0154	0.0143	0.0145	0.0137	0.0125	0	0	0.0002	0	0.0002	0	0	0	0	0.0001	0	0	0	0.0002	0	0	0.0001	0	0.0001	0	0.0003	0.0004	0	0.0003	0	0.0001	0.0004	0.0001	0.0004	0.0004	0	0	0	0	0.0004	0.0003	0.0004	0.0004	0.0004
187	0.1103	0.1052	0.1111	0.109	0.1112	0.0157	0.0147	0.0148	0.014	0.0128	0	0	0.0002	0	0.0002	0	0	0	0	0.0001	0	0	0	0.0002	0	0	0.0001	0	0.0001	0	0.0003	0.0004	0	0.0003	0	0.0001	0.0004	0.0001	0.0004	0.0004	0	0	0	0	0.0004	0.0003	0.0004	0.0004	0.0004
188	0.1121	0.1069	0.1128	0.1108	0.1129	0.016	0.015	0.0151	0.0143	0.0132	0	0	0.0002	0	0.0002	0	0	0	0	0.0001	0	0	0	0.0002	0	0	0.0001	0	0.0001	0	0.0003	0.0004	0	0.0003	0	0.0001	0.0004	0.0001	0.0004	0.0004	0	0	0	0	0.0004	0.0003	0.0004	0.0004	0.0004
189	0.1142	0.1087	0.1146	0.1127	0.1149	0.0163	0.0152	0.0154	0.0147	0.0136	0	0	0.0002	0	0.0002	0	0	0	0	0.0001	0	0	0	0.0002	0	0	0.0001	0	0.0001	0	0.0003	0.0004	0	0.0003	0	0.0001	0.0004	0.0001	0.0004	0.0004	0	0	0	0	0.0004	0.0003	0.0004	0.0004	0.0004
190	0.1159	0.1104	0.1166	0.1143	0.1164	0.0167	0.0156	0.0158	0.015	0.0138	0	0	0.0002	0	0.0002	0	0	0	0	0.0001	0	0	0	0.0002	0	0	0.0001	0	0.0001	0	0.0003	0.0004	0	0.0003	0	0.0001	0.0004	0.0001	0.0004	0.0004	0	0	0	0	0.0004	0.0003	0.0004	0.0004	0.0004
191	0.1178	0.112	0.1181	0.1161	0.1183	0.017	0.0158	0.0161	0.0154	0.0142	0	0	0.0002	0	0.0002	0	0	0	0	0.0001	0	0	0	0.0002	0	0	0.0001	0	0.0001	0	0.0003	0.0004	0	0.0003	0	0.0001	0.0004	0.0001	0.0004	0.0004	0	0	0	0	0.0004	0.0003	0.0004	0.0004	0.0004
192	0.1195	0.1137	0.1199	0.1179	0.1199	0.0173	0.0162	0.0164	0.0158	0.0144	0	0	0.0002	0	0.0002	0	0	0	0	0.0001	0	0	0	0.0002	0	0	0.0001	0	0.0001	0	0.0003	0.0004	0	0.0003	0	0.0001	0.0004	0.0001	0.0004	0.0004	0	0	0	0	0.0004	0.0003	0.0004	0.0004	0.0004
193	0.1214	0.1154	0.1217	0.1196	0.1218	0.0179	0.0166	0.0168	0.0161	0.0149	0	0	0.0002	0	0.0002	0	0	0	0	0.0001	0	0	0	0.0002	0	0	0.0001	0	0.0001	0	0.0003	0.0004	0	0.0003	0	0.0001	0.0004	0.0001	0.0004	0.0004	0	0	0	0	0.0004	0.0003	0.0004	0.0004	0.0004
194	0.123	0.1171	0.1233	0.1213	0.1235	0.0182	0.017	0.0172	0.0164	0.0151	0	0	0.0002	0	0.0002	0	0	0	0	0.0001	0	0	0	0.0002	0	0	0.0001	0	0.0001	0	0.0003	0.0004	0	0.0003	0	0.0001	0.0004	0.0001	0.0004	0.0004	0	0	0	0	0.0004	0.0003	0.0004	0.0004	0.0004
195	0.1249	0.1189	0.1253	0.123	0.1252	0.0185	0.0173	0.0176	0.0168	0.0154	0	0	0.0002	0	0.0002	0	0	0	0	0.0001	0	0	0	0.0002	0	0	0.0001	0	0.0001	0	0.0003	0.0004	0	0.0003	0	0.0001	0.0004	0.0001	0.0004	0.0004	0	0	0	0	0.0004	0.0003	0.0004	0.0004	0.0004
196	0.1266	0.1206	0.1272	0.1249	0.1272	0.019	0.0178	0.0179	0.0172	0.0159	0	0	0.0002	0	0.0002	0	0	0	0	0.0001	0	0	0	0.0002	0	0	0.0001	0	0.0001	0	0.0003	0.0004	0	0.0003	0	0.0001	0.0004	0.0001	0.0004	0.0004	0	0	0	0	0.0004	0.0003	0.0004	0.0004	0.0004
197	0.1284	0.1224	0.1289	0.1268	0.129	0.0193	0.018	0.0183	0.0175	0.0163	0	0	0.0002	0	0.0002	0	0	0	0	0.0001	0	0	0	0.0002	0	0	0.0001	0	0.0001	0	0.0003	0.0004	0	0.0003	0	0.0001	0.0004	0.0001	0.0004	0.0004	0	0	0	0	0.0004	0.0003	0.0004	0.0004	0.0004
198	0.1305	0.1243	0.1308	0.1286	0.1307	0.0196	0.0184	0.0188	0.0179	0.0165	0	0	0.0002	0	0.0002	0	0	0	0	0.0001	0	0	0	0.0002	0	0	0.0001	0	0.0001	0	0.0003	0.0004	0	0.0003	0	0.0001	0.0004	0.0001	0.0004	0.0004	0	0	0	0	0.0004	0.0003	0.0004	0.0004	0.0004
199	0.1324	0.1258	0.1326	0.1304	0.1325	0.02	0.0187	0.019	0.0183	0.0169	0	0	0.0002	0	0.0002	0	0	0	0	0.0001	0	0	0	0.0002	0	0	0.0001	0	0.0001	0	0.0003	0.0004	0	0.0003	0	0.0001	0.0004	0.0001	0.0004	0.0004	0	0	0	0	0.0004	0.0003	0.0004	0.0004	0.0004
200	0.134	0.1276	0.1344	0.1322	0.1343	0.0204	0.019	0.0194	0.0187	0.0172	0.0001	0.0001	0.0002	0	0.0002	0	0	0	0	0.0001	0	0	0	0.0002	0	0	0.0001	0	0.0001	0	0.0003	0.0004	0	0.0003	0	0.0001	0.0004	0.0001	0.0004	0.0004	0	0	0	0	0.0004	0.0003	0.0004	0.0004	0.0004
201	0.136	0.1292	0.1362	0.134	0.1362	0.0207	0.0194	0.0198	0.0191	0.0176	0	0.0001	0.0002	0	0.0002	0	0	0	0	0.0001	0	0	0	0.0002	0	0	0.0001	0	0.0001	0	0.0003	0.0004	0	0.0003	0	0.0001	0.0004	0.0001	0.0004	0.0004	0	0	0	0	0.0004	0.0003	0.0004	0.0004	0.0004
202	0.1382	0.1314	0.1384	0.1361	0.1383	0.0213	0.0198	0.0203	0.0195	0.018	0.0001	0.0001	0.0002	0	0.0002	0	0	0	0	0.0001	0	0	0	0.0002	0	0	0.0001	0	0.0001	0	0.0003	0.0004	0	0.0003	0	0.0001	0.0004	0.0001	0.0004	0.0004	0	0	0	0	0.0004	0.0003	0.0004	0.0004	0.0004
203	0.1399	0.1332	0.1403	0.1381	0.1402	0.0217	0.0202	0.0206	0.02	0.0184	0	0.0001	0.0002	0	0.0002	0	0	0	0	0.0001	0	0	0	0.0002	0	0	0.0001	0	0.0001	0	0.0003	0.0004	0	0.0003	0	0.0001	0.0004	0.0001	0.0004	0.0004	0	0	0	0	0.0004	0.0003	0.0004	0.0004	0.0004
204	0.142	0.1352	0.1423	0.14	0.1422	0.0221	0.0208	0.0211	0.0204	0.0188	0	0.0001	0.0002	0	0.0002	0	0	0	0	0.0001	0	0	0	0.0002	0	0	0.0001	0	0.0001	0	0.0003	0.0004	0	0.0003	0	0.0001	0.0004	0.0001	0.0004	0.0004	0	0	0	0	0.0004	0.0003	0.0004	0.0004	0.0004
205	0.1438	0.1371	0.1444	0.142	0.1442	0.0225	0.0212	0.0216	0.0208	0.0193	0.0002	0.0002	0.0002	0.0001	0.0002	0	0	0	0	0.0001	0	0	0	0.0002	0	0	0.0001	0	0.0001	0	0.0003	0.0004	0	0.0003	0	0.0001	0.0004	0.0001	0.0004	0.0004	0	0	0	0	0.0004	0.0003	0.0004	0.0004	0.0004
206	0.146	0.1393	0.1465	0.144	0.1461	0.0228	0.0214	0.022	0.0212	0.0196	0.0001	0.0001	0.0002	0	0.0002	0	0	0	0	0.0001	0	0	0	0.0002	0	0	0.0001	0	0.0001	0	0.0003	0.0004	0	0.0003	0	0.0001	0.0004	0.0001	0.0004	0.0004	0	0	0	0	0.0004	0.0003	0.0004	0.0004	0.0004
207	0.1482	0.1412	0.1487	0.1461	0.1483	0.0234	0.0219	0.0223	0.0217	0.02	0.0002	0.0002	0.0002	0.0001	0.0002	0	0	0	0	0.0001	0	0	0	0.0002	0	0	0.0001	0	0.0001	0	0.0003	0.0004	0	0.0003	0	0.0001	0.0004	0.0001	0.0004	0.0004	0	0	0	0	0.0004	0.0003	0.0004	0.0004	0.0004
208	0.1504	0.1432	0.1507	0.1482	0.1504	0.0238	0.0223	0.0228	0.022	0.0205	0.0002	0.0002	0.0002	0	0.0002	0	0	0	0	0.0001	0	0	0	0.0002	0	0	0.0001	0	0.0001	0	0.0003	0.0004	0	0.0003	0	0.0001	0.0004	0.0001	0.0004	0.0004	0	0	0	0	0.0004	0.0003	0.0004	0.0004	0.0004
209	0.1524	0.1454	0.1528	0.1505	0.1528	0.0243	0.0228	0.0233	0.0227	0.021	0.0002	0.0001	0.0002	0	0.0002	0	0	0	0	0.0001	0	0	0	0.0002	0	0	0.0001	0	0.0001	0	0.0003	0.0004	0	0.0003	0	0.0001	0.0004	0.0001	0.0004	0.0004	0	0	0	0	0.0004	0.0003	0.0004	0.0004	0.0004
210	0.1546	0.1472	0.1548	0.1524	0.1545	0.0248	0.0232	0.0236	0.023	0.0213	0.0002	0.0002	0.0002	0.0001	0.0002	0	0	0	0	0.0001	0	0	0	0.0002	0	0	0.0001	0	0.0001	0	0.0003	0.0004	0	0.0003	0	0.0001	0.0004	0.0001	0.0004	0.0004	0	0	0	0	0.0004	0.0003	0.0004	0.0004	0.0004
211	0.1567	0.1493	0.1569	0.1545	0.1566	0.0252	0.0236	0.0242	0.0235	0.0217	0.0002	0.0002	0.0002	0.0001	0.0002	0	0	0	0	0.0001	0	0	0	0.0002	0	0	0.0001	0	0.0001	0	0.0003	0.0004	0	0.0003	0	0.0001	0.0004	0.0001	0.0004	0.0004	0	0	0	0	0.0004	0.0003	0.0004	0.0004	0.0004
212	0.1587	0.1512	0.159	0.1566	0.1588	0.0256	0.0242	0.0247	0.0239	0.0222	0.0002	0.0002	0.0002	0.0001	0.0002	0	0	0	0	0.0001	0	0	0	0.0002	0	0	0.0001	0	0.0001	0	0.0003	0.0004	0	0.0003	0	0.0001	0.0004	0.0001	0.0004	0.0004	0	0	0	0	0.0004	0.0003	0.0004	0.0004	0.0004
213	0.161	0.1533	0.1612	0.1587	0.1609	0.0262	0.0246	0.0251	0.0244	0.0227	0.0002	0.0002	0.0002	0.0001	0.0002	0	0	0	0	0.0001	0	0	0	0.0002	0	0	0.0001	0	0.0001	0	0.0003	0.0004	0	0.0003	0	0.0001	0.0004	0.0001	0.0004	0.0004	0	0	0	0	0.0004	0.0003	0.0004	0.0004	0.0004
214	0.1632	0.1554	0.1634	0.1609	0.1631	0.0266	0.025	0.0257	0.0249	0.0231	0.0003	0.0002	0.0002	0.0001	0.0002	0	0	0	0	0.0001	0	0	0	0.0002	0	0	0.0001	0	0.0001	0	0.0003	0.0004	0	0.0003	0	0.0001	0.0004	0.0001	0.0004	0.0004	0	0	0	0	0.0004	0.0003	0.0004	0.0004	0.0004
215	0.1655	0.1577	0.1657	0.1632	0.1654	0.0271	0.0254	0.0261	0.0253	0.0235	0.0003	0.0002	0.0002	0.0001	0.0002	0	0	0	0	0.0001	0	0	0	0.0002	0	0	0.0001	0	0.0001	0	0.0003	0.0004	0	0.0003	0	0.0001	0.0004	0.0001	0.0004	0.0004	0	0	0	0	0.0004	0.0003	0.0004	0.0004	0.0004
216	0.1674	0.1595	0.1677	0.1651	0.1673	0.0275	0.0259	0.0264	0.0258	0.0239	0.0003	0.0002	0.0002	0.0001	0.0002	0	0	0	0	0.0001	0	0	0	0.0002	0	0	0.0001	0	0.0001	0	0.0003	0.0004	0	0.0003	0	0.0001	0.0004	0.0001	0.0004	0.0004	0	0	0	0	0.0004	0.0003	0.0004	0.0004	0.0004
217	0.1695	0.1617	0.1698	0.1674	0.1695	0.028	0.0264	0.0271	0.0262	0.0244	0.0003	0.0003	0.0002	0.0002	0.0002	0	0	0	0	0.0001	0	0	0	0.0002	0	0	0.0001	0	0.0001	0	0.0003	0.0004	0	0.0003	0	0.0001	0.0004	0.0001	0.0004	0.0004	0	0	0	0	0.0004	0.0003	0.0004	0.0004	0.0004
218	0.172	0.1636	0.172	0.1695	0.1717	0.0285	0.0269	0.0275	0.0267	0.0249	0.0003	0.0003	0.0002	0.0002	0.0002	0	0	0	0	0.0001	0	0	0	0.0002	0	0	0.0001	0	0.0001	0	0.0003	0.0004	0	0.0003	0	0.0001	0.0004	0.0001	0.0004	0.0004	0	0	0	0	0.0004	0.0003	0.0004	0.0004	0.0004
219	0.1745	0.1664	0.1746	0.1722	0.1743	0.0291	0.0274	0.0281	0.0274	0.0255	0.0003	0.0002	0.0002	0.0002	0.0002	0	0	0	0	0.0001	0	0	0	0.0002	0	0	0.0001	0	0.0001	0	0.0003	0.0004	0	0.0003	0	0.0001	0.0004	0.0001	0.0004	0.0004	0	0	0	0	0.0004	0.0003	0.0004	0.0004	0.0004
220	0.1765	0.1681	0.1767	0.1741	0.1763	0.0295	0.0279	0.0286	0.0277	0.026	0.0004	0.0002	0.0002	0.0002	0.0002	0	0	0	0	0.0001	0	0	0	0.0002	0	0	0.0001	0	0.0001	0	0.0003	0.0004	0	0.0003	0	0.0001	0.0004	0.0001	0.0004	0.0004	0	0	0	0	0.0004	0.0003	0.0004	0.0004	0.0004
221	0.1788	0.1702	0.1789	0.1764	0.1785	0.0301	0.0285	0.0292	0.0283	0.0264	0.0005	0.0003	0.0002	0.0003	0.0002	0	0	0	0	0.0001	0	0	0	0.0002	0	0	0.0001	0	0.0001	0	0.0003	0.0004	0	0.0003	0	0.0001	0.0004	0.0001	0.0004	0.0004	0	0	0	0	0.0004	0.0003	0.0004	0.0004	0.0004
222	0.1812	0.1727	0.1811	0.1787	0.1807	0.0307	0.0289	0.0297	0.0289	0.0269	0.0004	0.0003	0.0003	0.0003	0.0002	0	0	0	0	0.0001	0	0	0	0.0002	0	0	0.0001	0	0.0001	0	0.0003	0.0004	0	0.0003	0	0.0001	0.0004	0.0001	0.0004	0.0004	0	0	0	0	0.0004	0.0003	0.0004	0.0004	0.0004
223	0.1834	0.1747	0.1835	0.181	0.183	0.0312	0.0296	0.0302	0.0294	0.0274	0.0005	0.0003	0.0003	0.0003	0.0002	0	0	0	0	0.0001	0	0	0	0.0002	0	0	0.0001	0	0.0001	0	0.0003	0.0004	0	0.0003	0	0.0001	0.0004	0.0001	0.0004	0.0004	0	0	0	0	0.0004	0.0003	0.0004	0.0004	0.0004
224	0.1859	0.177	0.1858	0.1833	0.1855	0.0317	0.03	0.0307	0.03	0.0279	0.0005	0.0003	0.0002	0.0003	0.0002	0	0	0	0	0.0001	0	0	0	0.0002	0	0	0.0001	0	0.0001	0	0.0003	0.0004	0	0.0003	0	0.0001	0.0004	0.0001	0.0004	0.0004	0	0	0	0	0.0004	0.0003	0.0004	0.0004	0.0004
225	0.188	0.1792	0.1882	0.1856	0.1878	0.0323	0.0306	0.0312	0.0305	0.0286	0.0005	0.0003	0.0002	0.0003	0.0002	0	0	0	0	0.0001	0	0	0	0.0002	0	0	0.0001	0	0.0001	0	0.0003	0.0004	0	0.0003	0	0.0001	0.0004	0.0001	0.0004	0.0004	0	0	0	0	0.0004	0.0003	0.0004	0.0004	0.0004
226	0.1904	0.1814	0.1905	0.1879	0.19	0.033	0.0312	0.0318	0.031	0.0292	0.0006	0.0003	0.0003	0.0004	0.0002	0	0	0	0	0.0001	0	0	0	0.0002	0	0	0.0001	0	0.0001	0	0.0003	0.0004	0	0.0003	0	0.0001	0.0004	0.0001	0.0004	0.0004	0	0	0	0	0.0004	0.0003	0.0004	0.0004	0.0004
227	0.1926	0.1837	0.1927	0.1902	0.1924	0.0334	0.0315	0.0323	0.0314	0.0295	0.0005	0.0004	0.0003	0.0004	0.0002	0	0	0	0	0.0001	0	0	0	0.0002	0	0	0.0001	0	0.0001	0	0.0003	0.0004	0	0.0003	0	0.0001	0.0004	0.0001	0.0004	0.0004	0	0	0	0	0.0004	0.0003	0.0004	0.0004	0.0004
228	0.195	0.1859	0.1952	0.1925	0.1948	0.034	0.0322	0.0328	0.0321	0.0302	0.0005	0.0003	0.0003	0.0004	0.0002	0	0	0	0	0.0001	0	0	0	0.0002	0	0	0.0001	0	0.0001	0	0.0003	0.0004	0	0.0003	0	0.0001	0.0004	0.0001	0.0004	0.0004	0	0	0	0	0.0004	0.0003	0.0004	0.0004	0.0004
229	0.1976	0.188	0.1974	0.1949	0.1969	0.0345	0.0327	0.0334	0.0326	0.0306	0.0006	0.0003	0.0003	0.0004	0.0002	0	0	0	0	0.0001	0	0	0	0.0002	0	0	0.0001	0	0.0001	0	0.0003	0.0004	0	0.0003	0	0.0001	0.0004	0.0001	0.0004	0.0004	0	0	0	0	0.0004	0.0003	0.0004	0.0004	0.0004
230	0.2	0.1905	0.2	0.1974	0.1996	0.0351	0.0336	0.0342	0.0334	0.0314	0.0006	0.0003	0.0003	0.0005	0.0002	0	0	0	0	0.0001	0	0	0	0.0002	0	0	0.0001	0	0.0001	0	0.0003	0.0004	0	0.0003	0	0.0001	0.0004	0.0001	0.0004	0.0004	0	0	0	0	0.0004	0.0003	0.0004	0.0004	0.0004
231	0.2023	0.1927	0.2022	0.1996	0.2018	0.0358	0.034	0.0346	0.0339	0.0318	0.0006	0.0003	0.0003	0.0005	0.0002	0	0	0	0	0.0001	0	0	0	0.0002	0	0	0.0001	0	0.0001	0	0.0003	0.0004	0	0.0003	0	0.0001	0.0004	0.0001	0.0004	0.0004	0	0	0	0	0.0004	0.0003	0.0004	0.0004	0.0004
232	0.2048	0.1949	0.2047	0.2022	0.2043	0.0364	0.0345	0.0353	0.0343	0.0324	0.0006	0.0003	0.0004	0.0005	0.0002	0	0	0	0	0.0001	0	0	0	0.0002	0	0	0.0001	0	0.0001	0	0.0003	0.0004	0	0.0003	0	0.0001	0.0004	0.0001	0.0004	0.0004	0	0	0	0	0.0004	0.0003	0.0004	0.0004	0.0004
233	0.2073	0.1975	0.2073	0.2047	0.2069	0.0372	0.0353	0.0358	0.0352	0.0331	0.0007	0.0003	0.0003	0.0005	0.0002	0	0	0	0	0.0001	0	0	0	0.0002	0	0	0.0001	0	0.0001	0	0.0003	0.0004	0	0.0003	0	0.0001	0.0004	0.0001	0.0004	0.0004	0	0	0	0	0.0004	0.0003	0.0004	0.0004	0.0004
234	0.2096	0.1999	0.2098	0.2071	0.2092	0.0377	0.0359	0.0365	0.0357	0.0337	0.0006	0.0003	0.0004	0.0005	0.0002	0	0	0	0	0.0001	0	0	0	0.0002	0	0	0.0001	0	0.0001	0	0.0003	0.0004	0	0.0003	0	0.0001	0.0004	0.0001	0.0004	0.0004	0	0	0	0	0.0004	0.0003	0.0004	0.0004	0.0004
235	0.2122	0.2023	0.2121	0.2095	0.2116	0.0384	0.0365	0.0371	0.0364	0.0342	0.0008	0.0004	0.0005	0.0006	0.0002	0	0	0	0	0.0001	0	0	0	0.0002	0	0	0.0001	0	0.0001	0	0.0003	0.0004	0	0.0003	0	0.0001	0.0004	0.0001	0.0004	0.0004	0	0	0	0	0.0004	0.0003	0.0004	0.0004	0.0004
236	0.2147	0.2047	0.2145	0.2119	0.2141	0.039	0.0372	0.0377	0.037	0.0349	0.0008	0.0003	0.0004	0.0007	0.0002	0	0	0	0	0.0001	0	0	0	0.0002	0	0	0.0001	0	0.0001	0	0.0003	0.0004	0	0.0003	0	0.0001	0.0004	0.0001	0.0004	0.0004	0	0	0	0	0.0004	0.0003	0.0004	0.0004	0.0004
237	0.2171	0.207	0.2171	0.2144	0.2165	0.0396	0.0377	0.0383	0.0377	0.0355	0.0008	0.0003	0.0004	0.0006	0.0002	0	0	0	0	0.0001	0	0	0	0.0002	0	0	0.0001	0	0.0001	0	0.0003	0.0004	0	0.0003	0	0.0001	0.0004	0.0001	0.0004	0.0004	0	0	0	0	0.0004	0.0003	0.0004	0.0004	0.0004
238	0.2197	0.2093	0.2195	0.217	0.2192	0.0402	0.0383	0.0389	0.0383	0.0361	0.0008	0.0003	0.0004	0.0007	0.0002	0	0	0	0	0.0001	0	0	0	0.0002	0	0	0.0001	0	0.0001	0	0.0003	0.0004	0	0.0003	0	0.0001	0.0004	0.0001	0.0004	0.0004	0	0	0	0	0.0004	0.0003	0.0004	0.0004	0.0004
239	0.2223	0.212	0.2224	0.2196	0.2216	0.0408	0.0389	0.0396	0.039	0.0368	0.0008	0.0003	0.0006	0.0008	0.0002	0	0	0	0	0.0001	0	0	0	0.0002	0	0	0.0001	0	0.0001	0	0.0003	0.0004	0	0.0003	0	0.0001	0.0004	0.0001	0.0004	0.0004	0	0	0	0	0.0004	0.0003	0.0004	0.0004	0.0004
240	0.225	0.2147	0.2251	0.2222	0.2245	0.0415	0.0396	0.0403	0.0397	0.0375	0.0008	0.0003	0.0005	0.0008	0.0002	0	0	0	0	0.0001	0	0	0	0.0002	0	0	0.0001	0	0.0001	0	0.0003	0.0004	0	0.0003	0	0.0001	0.0004	0.0001	0.0004	0.0004	0	0	0	0	0.0004	0.0003	0.0004	0.0004	0.0004
241	0.2275	0.217	0.2276	0.2247	0.227	0.0424	0.0404	0.041	0.0405	0.0382	0.0008	0.0003	0.0005	0.0008	0.0002	0	0	0	0	0.0001	0	0	0	0.0002	0	0	0.0001	0	0.0001	0	0.0003	0.0004	0	0.0003	0	0.0001	0.0004	0.0001	0.0004	0.0004	0	0	0	0	0.0004	0.0003	0.0004	0.0004	0.0004
242	0.2301	0.2196	0.2302	0.2274	0.2296	0.043	0.0411	0.0418	0.0411	0.0389	0.0009	0.0004	0.0006	0.0009	0.0002	0	0	0	0	0.0001	0	0	0	0.0002	0	0	0.0001	0	0.0001	0	0.0003	0.0004	0	0.0003	0	0.0001	0.0004	0.0001	0.0004	0.0004	0	0	0	0	0.0004	0.0003	0.0004	0.0004	0.0004
243	0.2325	0.2221	0.2324	0.2298	0.232	0.0438	0.0419	0.0425	0.0418	0.0397	0.001	0.0004	0.0006	0.0009	0.0002	0	0	0	0	0.0001	0	0	0	0.0002	0	0	0.0001	0	0.0001	0	0.0003	0.0004	0	0.0003	0	0.0001	0.0004	0.0001	0.0004	0.0004	0	0	0	0	0.0004	0.0003	0.0004	0.0004	0.0004
244	0.2348	0.224	0.2348	0.2321	0.2343	0.0445	0.0425	0.0431	0.0424	0.0402	0.001	0.0003	0.0007	0.0009	0.0002	0	0	0	0	0.0001	0	0	0	0.0002	0	0	0.0001	0	0.0001	0	0.0003	0.0004	0	0.0003	0	0.0001	0.0004	0.0001	0.0004	0.0004	0	0	0	0	0.0004	0.0003	0.0004	0.0004	0.0004
245	0.2375	0.2267	0.2377	0.2347	0.237	0.045	0.0431	0.0437	0.0432	0.0408	0.0009	0.0003	0.0006	0.0009	0.0002	0	0	0	0	0.0001	0	0	0	0.0002	0	0	0.0001	0	0.0001	0	0.0003	0.0004	0	0.0003	0	0.0001	0.0004	0.0001	0.0004	0.0004	0	0	0	0	0.0004	0.0003	0.0004	0.0004	0.0004
246	0.24	0.2293	0.2401	0.2373	0.2395	0.0459	0.0439	0.0444	0.0438	0.0414	0.0011	0.0003	0.0007	0.001	0.0002	0	0	0	0	0.0001	0	0	0	0.0002	0	0	0.0001	0	0.0001	0	0.0003	0.0004	0	0.0003	0	0.0001	0.0004	0.0001	0.0004	0.0004	0	0	0	0	0.0004	0.0003	0.0004	0.0004	0.0004
247	0.2428	0.2318	0.2426	0.2398	0.242	0.0465	0.0446	0.0453	0.0446	0.0422	0.0011	0.0004	0.0008	0.0011	0.0002	0	0	0	0	0.0001	0	0	0	0.0002	0	0	0.0001	0	0.0001	0	0.0003	0.0004	0	0.0003	0	0.0001	0.0004	0.0001	0.0004	0.0004	0	0	0	0	0.0004	0.0003	0.0004	0.0004	0.0004
248	0.2454	0.2343	0.2453	0.2424	0.2447	0.0474	0.0452	0.046	0.0454	0.043	0.0012	0.0004	0.0008	0.0012	0.0002	0	0	0	0	0.0001	0	0	0	0.0002	0	0	0.0001	0	0.0001	0	0.0003	0.0004	0	0.0003	0	0.0001	0.0004	0.0001	0.0004	0.0004	0	0	0	0	0.0004	0.0003	0.0004	0.0004	0.0004
249	0.2479	0.2367	0.2479	0.245	0.2473	0.0481	0.0461	0.0467	0.046	0.0436	0.0013	0.0004	0.001	0.0012	0.0002	0	0	0	0	0.0001	0	0	0	0.0002	0	0	0.0001	0	0.0001	0	0.0003	0.0004	0	0.0003	0	0.0001	0.0004	0.0001	0.0004	0.0004	0	0	0	0	0.0004	0.0003	0.0004	0.0004	0.0004
250	0.2505	0.2392	0.2505	0.2476	0.2499	0.0488	0.0468	0.0473	0.0468	0.0443	0.0012	0.0003	0.0008	0.0012	0.0002	0	0	0	0	0.0001	0	0	0	0.0002	0	0	0.0001	0	0.0001	0	0.0003	0.0004	0	0.0003	0	0.0001	0.0004	0.0001	0.0004	0.0004	0	0	0	0	0.0004	0.0003	0.0004	0.0004	0.0004
251	0.2533	0.2417	0.2531	0.2502	0.2525	0.0496	0.0476	0.0482	0.0476	0.0452	0.0014	0.0005	0.001	0.0013	0.0002	0	0	0	0	0.0001	0	0	0	0.0002	0	0	0.0001	0	0.0001	0	0.0003	0.0004	0	0.0003	0	0.0001	0.0004	0.0001	0.0004	0.0004	0	0	0	0	0.0004	0.0003	0.0004	0.0004	0.0004
252	0.2557	0.244	0.2558	0.2526	0.255	0.0503	0.0484	0.0489	0.0483	0.0458	0.0013	0.0004	0.001	0.0013	0.0002	0	0	0	0	0.0001	0	0	0	0.0002	0	0	0.0001	0	0.0001	0	0.0003	0.0004	0	0.0003	0	0.0001	0.0004	0.0001	0.0004	0.0004	0	0	0	0	0.0004	0.0003	0.0004	0.0004	0.0004
253	0.2584	0.2467	0.2583	0.2555	0.2578	0.0512	0.049	0.0497	0.0491	0.0465	0.0015	0.0005	0.0011	0.0014	0.0002	0	0	0	0	0.0001	0	0	0	0.0002	0	0	0.0001	0	0.0001	0	0.0003	0.0004	0	0.0003	0	0.0001	0.0004	0.0001	0.0004	0.0004	0	0	0	0	0.0004	0.0003	0.0004	0.0004	0.0004
254	0.2611	0.2492	0.261	0.258	0.2603	0.0519	0.0497	0.0504	0.0498	0.0472	0.0016	0.0006	0.0012	0.0016	0.0002	0	0	0	0	0.0001	0	0	0	0.0002	0	0	0.0001	0	0.0001	0	0.0003	0.0004	0	0.0003	0	0.0001	0.0004	0.0001	0.0004	0.0004	0	0	0	0	0.0004	0.0003	0.0004	0.0004	0.0004
255	0.2638	0.2518	0.2636	0.2606	0.2629	0.0528	0.0506	0.0512	0.0506	0.048	0.0015	0.0005	0.0012	0.0015	0.0002	0	0	0	0	0.0001	0	0	0	0.0002	0	0	0.0001	0	0.0001	0	0.0003	0.0004	0	0.0003	0	0.0001	0.0004	0.0001	0.0004	0.0004	0	0	0	0	0.0004	0.0003	0.0004	0.0004	0.0004
256	0.2664	0.2541	0.2661	0.2631	0.2656	0.0535	0.0513	0.052	0.0515	0.0489	0.0017	0.0006	0.0013	0.0016	0.0002	0	0	0	0	0.0001	0	0	0	0.0002	0	0	0.0001	0	0.0001	0	0.0003	0.0004	0	0.0003	0	0.0001	0.0004	0.0001	0.0004	0.0004	0	0	0	0	0.0004	0.0003	0.0004	0.0004	0.0004
257	0.2691	0.2568	0.2689	0.2659	0.2682	0.0543	0.0522	0.0528	0.0522	0.0496	0.0018	0.0007	0.0014	0.0017	0.0002	0	0	0	0	0.0001	0	0	0	0.0002	0	0	0.0001	0	0.0001	0	0.0003	0.0004	0	0.0003	0	0.0001	0.0004	0.0001	0.0004	0.0004	0	0	0	0	0.0004	0.0003	0.0004	0.0004	0.0004
258	0.2718	0.2594	0.2715	0.2685	0.2709	0.0551	0.0529	0.0535	0.0529	0.0503	0.0018	0.0007	0.0014	0.0018	0.0002	0	0	0	0	0.0001	0	0	0	0.0002	0	0	0.0001	0	0.0001	0	0.0003	0.0004	0	0.0003	0	0.0001	0.0004	0.0001	0.0004	0.0004	0	0	0	0	0.0004	0.0003	0.0004	0.0004	0.0004
259	0.2744	0.2619	0.2742	0.2712	0.2736	0.056	0.0538	0.0545	0.054	0.0511	0.0019	0.0008	0.0015	0.0018	0.0002	0	0	0	0	0.0001	0	0	0	0.0002	0	0	0.0001	0	0.0001	0	0.0003	0.0004	0	0.0003	0	0.0001	0.0004	0.0001	0.0004	0.0004	0	0	0	0	0.0004	0.0003	0.0004	0.0004	0.0004
260	0.2771	0.2645	0.277	0.2739	0.2762	0.0567	0.0544	0.0551	0.0546	0.0518	0.002	0.0008	0.0016	0.002	0.0002	0	0	0	0	0.0001	0	0	0	0.0002	0	0	0.0001	0	0.0001	0	0.0003	0.0004	0	0.0003	0	0.0001	0.0004	0.0001	0.0004	0.0004	0	0	0	0	0.0004	0.0003	0.0004	0.0004	0.0004
261	0.2797	0.267	0.2797	0.2764	0.2788	0.0575	0.0553	0.056	0.0555	0.0526	0.002	0.0009	0.0016	0.002	0.0002	0	0	0	0	0.0001	0	0	0	0.0002	0	0	0.0001	0	0.0001	0	0.0003	0.0004	0	0.0003	0	0.0001	0.0004	0.0001	0.0004	0.0004	0	0	0	0	0.0004	0.0003	0.0004	0.0004	0.0004
262	0.2826	0.2695	0.2822	0.2791	0.2815	0.0584	0.0564	0.0569	0.0562	0.0535	0.0023	0.0011	0.0018	0.0022	0.0002	0	0	0	0	0.0001	0	0	0	0.0002	0	0	0.0001	0	0.0001	0	0.0003	0.0004	0	0.0003	0	0.0001	0.0004	0.0001	0.0004	0.0004	0	0	0	0	0.0004	0.0003	0.0004	0.0004	0.0004
263	0.2851	0.2721	0.2848	0.2817	0.2841	0.0592	0.057	0.0577	0.057	0.0542	0.0023	0.0011	0.0019	0.0022	0.0002	0	0	0	0	0.0001	0	0	0	0.0002	0	0	0.0001	0	0.0001	0	0.0003	0.0004	0	0.0003	0	0.0001	0.0004	0.0001	0.0004	0.0004	0	0	0	0	0.0004	0.0003	0.0004	0.0004	0.0004
264	0.2878	0.2745	0.2877	0.2843	0.2868	0.0602	0.0579	0.0585	0.0579	0.055	0.0025	0.0012	0.002	0.0024	0.0002	0	0	0	0	0.0001	0	0	0	0.0002	0	0	0.0001	0	0.0001	0	0.0003	0.0004	0	0.0003	0	0.0001	0.0004	0.0001	0.0004	0.0004	0	0	0	0	0.0004	0.0003	0.0004	0.0004	0.0004
265	0.2905	0.2772	0.2903	0.2871	0.2896	0.0609	0.0587	0.0594	0.0588	0.0558	0.0026	0.0014	0.0021	0.0025	0.0002	0	0	0	0	0.0001	0	0	0	0.0002	0	0	0.0001	0	0.0001	0	0.0003	0.0004	0	0.0003	0	0.0001	0.0004	0.0001	0.0004	0.0004	0	0	0	0	0.0004	0.0003	0.0004	0.0004	0.0004
266	0.2932	0.2798	0.293	0.2897	0.2921	0.0619	0.0595	0.0603	0.0596	0.0567	0.0027	0.0014	0.0022	0.0026	0.0002	0	0	0	0	0.0001	0	0	0	0.0002	0	0	0.0001	0	0.0001	0	0.0003	0.0004	0	0.0003	0	0.0001	0.0004	0.0001	0.0004	0.0004	0	0	0	0	0.0004	0.0003	0.0004	0.0004	0.0004
267	0.296	0.2822	0.2958	0.2924	0.2947	0.0629	0.0604	0.0612	0.0606	0.0576	0.0028	0.0016	0.0024	0.0027	0.0002	0	0	0	0	0.0001	0	0	0	0.0002	0	0	0.0001	0	0.0001	0	0.0003	0.0004	0	0.0003	0	0.0001	0.0004	0.0001	0.0004	0.0004	0	0	0	0	0.0004	0.0003	0.0004	0.0004	0.0004
268	0.2987	0.285	0.2984	0.2952	0.2975	0.0637	0.0614	0.0622	0.0615	0.0586	0.003	0.0018	0.0025	0.0028	0.0003	0	0	0	0	0.0001	0	0	0	0.0002	0	0	0.0001	0	0.0001	0	0.0003	0.0004	0	0.0003	0	0.0001	0.0004	0.0001	0.0004	0.0004	0	0	0	0	0.0004	0.0003	0.0004	0.0004	0.0004
269	0.3014	0.2874	0.3013	0.2978	0.3002	0.0646	0.0621	0.063	0.0623	0.0592	0.0031	0.0019	0.0026	0.0031	0.0002	0	0	0	0	0.0001	0	0	0	0.0002	0	0	0.0001	0	0.0001	0	0.0003	0.0004	0	0.0003	0	0.0001	0.0004	0.0001	0.0004	0.0004	0	0	0	0	0.0004	0.0003	0.0004	0.0004	0.0004
270	0.3041	0.2901	0.304	0.3005	0.3029	0.0654	0.0631	0.0639	0.0632	0.0603	0.0032	0.0019	0.0028	0.0032	0.0004	0	0	0	0	0.0001	0	0	0	0.0002	0	0	0.0001	0	0.0001	0	0.0003	0.0004	0	0.0003	0	0.0001	0.0004	0.0001	0.0004	0.0004	0	0	0	0	0.0004	0.0003	0.0004	0.0004	0.0004
271	0.3068	0.2926	0.3067	0.3034	0.3057	0.0664	0.0641	0.0648	0.0642	0.0611	0.0034	0.0022	0.0029	0.0033	0.0004	0	0	0	0	0.0001	0	0	0	0.0002	0	0	0.0001	0	0.0001	0	0.0003	0.0004	0	0.0003	0	0.0001	0.0004	0.0001	0.0004	0.0004	0	0	0	0	0.0004	0.0003	0.0004	0.0004	0.0004
272	0.3097	0.2952	0.3094	0.3061	0.3084	0.0675	0.0648	0.0658	0.065	0.0621	0.0035	0.0022	0.003	0.0034	0.0003	0	0	0	0	0.0001	0	0	0	0.0002	0	0	0.0001	0	0.0001	0	0.0003	0.0004	0	0.0003	0	0.0001	0.0004	0.0001	0.0004	0.0004	0	0	0	0	0.0004	0.0003	0.0004	0.0004	0.0004
273	0.3123	0.2978	0.3121	0.3086	0.311	0.0683	0.0659	0.0667	0.066	0.0628	0.0037	0.0025	0.0031	0.0036	0.0002	0	0	0	0	0.0001	0	0	0	0.0002	0	0	0.0001	0	0.0001	0	0.0003	0.0004	0	0.0003	0	0.0001	0.0004	0.0001	0.0004	0.0004	0	0	0	0	0.0004	0.0003	0.0004	0.0004	0.0004
274	0.315	0.3004	0.3147	0.3113	0.3137	0.0692	0.0666	0.0674	0.067	0.0638	0.0038	0.0026	0.0032	0.0037	0.0002	0	0	0	0	0.0001	0	0	0	0.0002	0	0	0.0001	0	0.0001	0	0.0003	0.0004	0	0.0003	0	0.0001	0.0004	0.0001	0.0004	0.0004	0	0	0	0	0.0004	0.0003	0.0004	0.0004	0.0004
275	0.3178	0.3029	0.3175	0.314	0.3164	0.0702	0.0679	0.0686	0.0679	0.0647	0.0041	0.0027	0.0035	0.0039	0.0002	0	0	0	0	0.0001	0	0	0	0.0002	0	0	0.0001	0	0.0001	0	0.0003	0.0004	0	0.0003	0	0.0001	0.0004	0.0001	0.0004	0.0004	0	0	0	0	0.0004	0.0003	0.0004	0.0004	0.0004
276	0.3207	0.3056	0.3204	0.3168	0.319	0.0712	0.0688	0.0695	0.0688	0.0657	0.0042	0.0029	0.0036	0.0039	0.0003	0	0	0	0	0.0001	0	0	0	0.0002	0	0	0.0001	0	0.0001	0	0.0003	0.0004	0	0.0003	0	0.0001	0.0004	0.0001	0.0004	0.0004	0	0	0	0	0.0004	0.0003	0.0004	0.0004	0.0004
277	0.3232	0.3082	0.3231	0.3194	0.3218	0.0721	0.0695	0.0705	0.07	0.0666	0.0043	0.0032	0.0038	0.0042	0.0002	0	0	0	0	0.0001	0	0	0	0.0002	0	0	0.0001	0	0.0001	0	0.0003	0.0004	0	0.0003	0	0.0001	0.0004	0.0001	0.0004	0.0004	0	0	0	0	0.0004	0.0003	0.0004	0.0004	0.0004
278	0.3261	0.3108	0.3258	0.3221	0.3247	0.0734	0.0706	0.0715	0.071	0.0676	0.0044	0.0032	0.004	0.0043	0.0002	0	0	0	0	0.0001	0	0	0	0.0002	0	0	0.0001	0	0.0001	0	0.0003	0.0004	0	0.0003	0	0.0001	0.0004	0.0001	0.0004	0.0004	0	0	0	0	0.0004	0.0003	0.0004	0.0004	0.0004
279	0.3288	0.3134	0.3285	0.325	0.3273	0.0742	0.0716	0.0725	0.0718	0.0686	0.0046	0.0033	0.0041	0.0045	0.0002	0	0	0	0	0.0001	0	0	0	0.0002	0	0	0.0001	0	0.0001	0	0.0003	0.0004	0	0.0003	0	0.0001	0.0004	0.0001	0.0004	0.0004	0	0	0	0	0.0004	0.0003	0.0004	0.0004	0.0004
280	0.3314	0.3158	0.3311	0.3275	0.3298	0.0754	0.0726	0.0735	0.0728	0.0696	0.0048	0.0035	0.0042	0.0047	0.0005	0	0	0	0	0.0001	0	0	0	0.0002	0	0	0.0001	0	0.0001	0	0.0003	0.0004	0	0.0003	0	0.0001	0.0004	0.0001	0.0004	0.0004	0	0	0	0	0.0004	0.0003	0.0004	0.0004	0.0004
281	0.3343	0.3186	0.3341	0.3304	0.3329	0.0765	0.0737	0.0748	0.0741	0.0706	0.0049	0.0035	0.0044	0.0049	0.0007	0	0	0	0	0.0001	0	0	0	0.0002	0	0	0.0001	0	0.0001	0	0.0003	0.0004	0	0.0003	0	0.0001	0.0004	0.0001	0.0004	0.0004	0	0	0	0	0.0004	0.0003	0.0004	0.0004	0.0004
282	0.3369	0.3211	0.3367	0.333	0.3353	0.0774	0.0747	0.0757	0.075	0.0716	0.005	0.0038	0.0045	0.005	0.0003	0	0	0	0	0.0001	0	0	0	0.0002	0	0	0.0001	0	0.0001	0	0.0003	0.0004	0	0.0003	0	0.0001	0.0004	0.0001	0.0004	0.0004	0	0	0	0	0.0004	0.0003	0.0004	0.0004	0.0004
283	0.3396	0.3237	0.3394	0.3358	0.3381	0.0785	0.0757	0.0766	0.0762	0.0726	0.0053	0.004	0.0048	0.0052	0.0005	0	0	0	0	0.0001	0	0	0	0.0002	0	0	0.0001	0	0.0001	0	0.0003	0.0004	0	0.0003	0	0.0001	0.0004	0.0001	0.0004	0.0004	0	0	0	0	0.0004	0.0003	0.0004	0.0004	0.0004
284	0.3425	0.3263	0.3423	0.3383	0.3408	0.0798	0.0768	0.0777	0.0775	0.0735	0.0054	0.0042	0.005	0.0054	0.0003	0	0	0	0	0.0001	0	0	0	0.0002	0	0	0.0001	0	0.0001	0	0.0003	0.0004	0	0.0003	0	0.0001	0.0004	0.0001	0.0004	0.0004	0	0	0	0	0.0004	0.0003	0.0004	0.0004	0.0004
285	0.3452	0.3288	0.3448	0.341	0.3435	0.0806	0.0778	0.0788	0.0781	0.0746	0.0057	0.0044	0.0051	0.0056	0.0006	0	0	0	0	0.0001	0	0	0	0.0002	0	0	0.0001	0	0.0001	0	0.0003	0.0004	0	0.0003	0	0.0001	0.0004	0.0001	0.0004	0.0004	0	0	0	0	0.0004	0.0003	0.0004	0.0004	0.0004
286	0.3478	0.3313	0.3476	0.3436	0.3461	0.0817	0.0788	0.0799	0.0794	0.0756	0.0059	0.0045	0.0052	0.0057	0.0003	0	0	0	0	0.0001	0	0	0	0.0002	0	0	0.0001	0	0.0001	0	0.0003	0.0004	0	0.0003	0	0.0001	0.0004	0.0001	0.0004	0.0004	0	0	0	0	0.0004	0.0003	0.0004	0.0004	0.0004
287	0.3506	0.3341	0.3503	0.3465	0.3489	0.0829	0.0798	0.081	0.0804	0.0768	0.006	0.0047	0.0055	0.006	0.001	0	0	0	0	0.0001	0	0	0	0.0002	0	0	0.0001	0	0.0001	0	0.0003	0.0004	0	0.0003	0	0.0001	0.0004	0.0001	0.0004	0.0004	0	0	0	0	0.0004	0.0003	0.0004	0.0004	0.0004
288	0.3532	0.3364	0.3529	0.349	0.3515	0.084	0.0808	0.082	0.0815	0.0776	0.0062	0.0049	0.0057	0.0061	0.0004	0	0	0	0	0.0001	0	0	0	0.0002	0	0	0.0001	0	0.0001	0	0.0003	0.0004	0	0.0003	0	0.0001	0.0004	0.0001	0.0004	0.0004	0	0	0	0	0.0004	0.0003	0.0004	0.0004	0.0004
289	0.3559	0.339	0.3557	0.3516	0.3541	0.0849	0.0818	0.0831	0.0824	0.0787	0.0064	0.005	0.0058	0.0063	0.001	0	0	0	0	0.0001	0	0	0	0.0002	0	0	0.0001	0	0.0001	0	0.0003	0.0004	0	0.0003	0	0.0001	0.0004	0.0001	0.0004	0.0004	0	0	0	0	0.0004	0.0003	0.0004	0.0004	0.0004
290	0.3585	0.3416	0.3583	0.3544	0.3567	0.0861	0.0832	0.0841	0.0836	0.0799	0.0066	0.0053	0.006	0.0065	0.0007	0	0	0	0	0.0001	0	0	0	0.0002	0	0	0.0001	0	0.0001	0	0.0003	0.0004	0	0.0003	0	0.0001	0.0004	0.0001	0.0004	0.0004	0	0	0	0	0.0004	0.0003	0.0004	0.0004	0.0004
291	0.3613	0.3442	0.3611	0.3572	0.3595	0.0874	0.0843	0.0855	0.0849	0.0811	0.0068	0.0054	0.0063	0.0067	0.0009	0	0	0	0	0.0001	0	0	0	0.0002	0	0	0.0001	0	0.0001	0	0.0003	0.0004	0	0.0003	0	0.0001	0.0004	0.0001	0.0004	0.0004	0	0	0	0	0.0004	0.0003	0.0004	0.0004	0.0004
292	0.364	0.3466	0.3638	0.3596	0.3621	0.0884	0.085	0.0865	0.0858	0.0821	0.007	0.0057	0.0064	0.0069	0.0011	0	0	0	0	0.0001	0	0	0	0.0002	0	0	0.0001	0	0.0001	0	0.0003	0.0004	0	0.0003	0	0.0001	0.0004	0.0001	0.0004	0.0004	0	0	0	0	0.0004	0.0003	0.0004	0.0004	0.0004
293	0.3667	0.3491	0.3664	0.3622	0.3648	0.0897	0.0864	0.0877	0.087	0.083	0.0073	0.0058	0.0066	0.0071	0.001	0	0	0	0	0.0001	0	0	0	0.0002	0	0	0.0001	0	0.0001	0	0.0003	0.0004	0	0.0003	0	0.0001	0.0004	0.0001	0.0004	0.0004	0	0	0	0	0.0004	0.0003	0.0004	0.0004	0.0004
294	0.3694	0.3519	0.3692	0.365	0.3675	0.0909	0.0873	0.0889	0.0883	0.0843	0.0075	0.0061	0.0068	0.0074	0.0007	0	0	0	0	0.0001	0	0	0	0.0002	0	0	0.0001	0	0.0001	0	0.0003	0.0004	0	0.0003	0	0.0001	0.0004	0.0001	0.0004	0.0004	0	0	0	0	0.0004	0.0003	0.0004	0.0004	0.0004
295	0.3723	0.3545	0.372	0.3679	0.3704	0.0919	0.0887	0.0901	0.0895	0.0855	0.0076	0.0062	0.007	0.0075	0.0015	0	0	0	0	0.0001	0	0	0	0.0002	0	0	0.0001	0	0.0001	0	0.0003	0.0004	0	0.0003	0	0.0001	0.0004	0.0001	0.0004	0.0004	0	0	0	0	0.0004	0.0003	0.0004	0.0004	0.0004
296	0.3749	0.3571	0.3746	0.3705	0.3731	0.0931	0.0897	0.0913	0.0908	0.0868	0.0078	0.0064	0.0073	0.0077	0.0008	0	0	0	0	0.0001	0	0	0	0.0002	0	0	0.0001	0	0.0001	0	0.0003	0.0004	0	0.0003	0	0.0001	0.0004	0.0001	0.0004	0.0004	0	0	0	0	0.0004	0.0003	0.0004	0.0004	0.0004
297	0.3777	0.3595	0.3773	0.3732	0.3757	0.0944	0.091	0.0924	0.0919	0.0879	0.0081	0.0067	0.0075	0.0081	0.0017	0	0	0	0	0.0001	0	0	0	0.0002	0	0	0.0001	0	0.0001	0	0.0003	0.0004	0	0.0003	0	0.0001	0.0004	0.0001	0.0004	0.0004	0	0	0	0	0.0004	0.0003	0.0004	0.0004	0.0004
298	0.3803	0.3622	0.3801	0.376	0.3784	0.0956	0.0922	0.0938	0.0932	0.0894	0.0085	0.007	0.0079	0.0084	0.0009	0	0	0	0	0.0001	0	0	0	0.0002	0	0	0.0001	0	0.0001	0	0.0003	0.0004	0	0.0003	0	0.0001	0.0004	0.0001	0.0004	0.0004	0	0	0	0	0.0004	0.0003	0.0004	0.0004	0.0004
299	0.3829	0.3646	0.3826	0.3785	0.3808	0.0968	0.0931	0.095	0.0943	0.0901	0.0086	0.0072	0.008	0.0085	0.0009	0	0	0	0	0.0001	0	0	0	0.0002	0	0	0.0001	0	0.0001	0	0.0003	0.0004	0	0.0003	0	0.0001	0.0004	0.0001	0.0004	0.0004	0	0	0	0	0.0004	0.0003	0.0004	0.0004	0.0004
300	0.3855	0.3669	0.3851	0.381	0.3835	0.098	0.0944	0.0964	0.0957	0.0917	0.0089	0.0074	0.0083	0.0087	0.0015	0	0	0	0	0.0001	0	0	0	0.0002	0	0	0.0001	0	0.0001	0	0.0003	0.0004	0	0.0003	0	0.0001	0.0004	0.0001	0.0004	0.0004	0	0	0	0	0.0004	0.0003	0.0004	0.0004	0.0004
301	0.3883	0.3696	0.3879	0.3836	0.3861	0.099	0.0958	0.0974	0.0967	0.0925	0.0091	0.0076	0.0086	0.009	0.0018	0	0	0	0	0.0001	0	0	0	0.0002	0	0	0.0001	0	0.0001	0	0.0003	0.0004	0	0.0003	0	0.0001	0.0004	0.0001	0.0004	0.0004	0	0	0	0	0.0004	0.0003	0.0004	0.0004	0.0004
302	0.3906	0.3719	0.3903	0.3861	0.3887	0.1003	0.0968	0.0985	0.0977	0.0937	0.0092	0.0077	0.0086	0.0091	0.0012	0	0	0	0	0.0001	0	0	0	0.0002	0	0	0.0001	0	0.0001	0	0.0003	0.0004	0	0.0003	0	0.0001	0.0004	0.0001	0.0004	0.0004	0	0	0	0	0.0004	0.0003	0.0004	0.0004	0.0004
303	0.3934	0.3745	0.3929	0.3888	0.3913	0.1017	0.0979	0.0998	0.099	0.0948	0.0096	0.008	0.0089	0.0094	0.0018	0	0	0	0	0.0001	0	0	0	0.0002	0	0	0.0001	0	0.0001	0	0.0003	0.0004	0	0.0003	0	0.0001	0.0004	0.0001	0.0004	0.0004	0	0	0	0	0.0004	0.0003	0.0004	0.0004	0.0004
304	0.3962	0.3772	0.3957	0.3916	0.3942	0.1031	0.0993	0.1013	0.1005	0.0964	0.0099	0.0083	0.0092	0.0098	0.0021	0	0	0	0	0.0001	0	0	0	0.0002	0	0	0.0001	0	0.0001	0	0.0003	0.0004	0	0.0003	0	0.0001	0.0004	0.0001	0.0004	0.0004	0	0	0	0	0.0004	0.0003	0.0004	0.0004	0.0004
305	0.3988	0.3795	0.3982	0.3941	0.3966	0.1042	0.1005	0.1026	0.1016	0.0975	0.01	0.0085	0.0094	0.0099	0.0023	0	0	0	0	0.0001	0	0	0	0.0002	0	0	0.0001	0	0.0001	0	0.0003	0.0004	0	0.0003	0	0.0001	0.0004	0.0001	0.0004	0.0004	0	0	0	0	0.0004	0.0003	0.0004	0.0004	0.0004
306	0.4015	0.3821	0.401	0.3968	0.3993	0.1058	0.1016	0.1037	0.103	0.0987	0.0104	0.0088	0.0097	0.0102	0.0025	0	0	0	0	0.0001	0	0	0	0.0002	0	0	0.0001	0	0.0001	0	0.0003	0.0004	0	0.0003	0	0.0001	0.0004	0.0001	0.0004	0.0004	0	0	0	0	0.0004	0.0003	0.0004	0.0004	0.0004
307	0.4041	0.3846	0.4035	0.3993	0.4018	0.1068	0.1027	0.105	0.1042	0.1	0.0106	0.009	0.0099	0.0104	0.0018	0	0	0	0	0.0001	0	0	0	0.0002	0	0	0.0001	0	0.0001	0	0.0003	0.0004	0	0.0003	0	0.0001	0.0004	0.0001	0.0004	0.0004	0	0	0	0	0.0004	0.0003	0.0004	0.0004	0.0004
308	0.4067	0.387	0.4061	0.4019	0.4044	0.1082	0.1042	0.1066	0.1055	0.1013	0.0109	0.0093	0.0102	0.0107	0.0028	0	0	0	0	0.0001	0	0	0	0.0002	0	0	0.0001	0	0.0001	0	0.0003	0.0004	0	0.0003	0	0.0001	0.0004	0.0001	0.0004	0.0004	0	0	0	0	0.0004	0.0003	0.0004	0.0004	0.0004
309	0.4093	0.3895	0.4087	0.4045	0.4071	0.1095	0.1058	0.1079	0.107	0.1026	0.0112	0.0097	0.0105	0.0111	0.0019	0	0	0	0	0.0001	0	0	0	0.0002	0	0	0.0001	0	0.0001	0	0.0003	0.0004	0	0.0003	0	0.0001	0.0004	0.0001	0.0004	0.0004	0	0	0	0	0.0004	0.0003	0.0004	0.0004	0.0004
310	0.4118	0.3919	0.4112	0.4069	0.4095	0.1108	0.1067	0.1091	0.1081	0.1035	0.0113	0.0098	0.0107	0.0113	0.0032	0	0	0	0	0.0001	0	0	0	0.0002	0	0	0.0001	0	0.0001	0	0.0003	0.0004	0	0.0003	0	0.0001	0.0004	0.0001	0.0004	0.0004	0	0	0	0	0.0004	0.0003	0.0004	0.0004	0.0004
311	0.4144	0.3944	0.4137	0.4095	0.4122	0.1122	0.1081	0.1104	0.1094	0.105	0.0116	0.01	0.0111	0.0115	0.0032	0	0	0	0	0.0001	0	0	0	0.0002	0	0	0.0001	0	0.0001	0	0.0003	0.0004	0	0.0003	0	0.0001	0.0004	0.0001	0.0004	0.0004	0	0	0	0	0.0004	0.0003	0.0004	0.0004	0.0004
312	0.417	0.3969	0.4163	0.4121	0.4147	0.1133	0.1092	0.1117	0.1107	0.1062	0.0119	0.0104	0.0113	0.0118	0.0027	0	0	0	0	0.0001	0	0	0	0.0002	0	0	0.0001	0	0.0001	0	0.0003	0.0004	0	0.0003	0	0.0001	0.0004	0.0001	0.0004	0.0004	0	0	0	0	0.0004	0.0003	0.0004	0.0004	0.0004
313	0.4196	0.3992	0.4189	0.4147	0.4173	0.1149	0.1105	0.1131	0.1121	0.1076	0.0122	0.0106	0.0115	0.012	0.0026	0	0	0	0	0.0001	0	0	0	0.0002	0	0	0.0001	0	0.0001	0	0.0003	0.0004	0	0.0003	0	0.0001	0.0004	0.0001	0.0004	0.0004	0	0	0	0	0.0004	0.0003	0.0004	0.0004	0.0004
314	0.4222	0.4016	0.4215	0.4173	0.4198	0.1161	0.1118	0.1143	0.1134	0.1087	0.0125	0.0109	0.0119	0.0123	0.0027	0	0	0	0	0.0001	0	0	0	0.0002	0	0	0.0001	0	0.0001	0	0.0003	0.0004	0	0.0003	0	0.0001	0.0004	0.0001	0.0004	0.0004	0	0	0	0	0.0004	0.0003	0.0004	0.0004	0.0004
315	0.4247	0.404	0.424	0.4197	0.4223	0.1177	0.1131	0.1159	0.1149	0.1103	0.0128	0.0112	0.0121	0.0126	0.0038	0	0	0	0	0.0001	0	0	0	0.0002	0	0	0.0001	0	0.0001	0	0.0003	0.0004	0	0.0003	0	0.0001	0.0004	0.0001	0.0004	0.0004	0	0	0	0	0.0004	0.0003	0.0004	0.0004	0.0004
316	0.4274	0.4067	0.4266	0.4223	0.4249	0.119	0.1147	0.1172	0.1162	0.1117	0.0131	0.0115	0.0124	0.0129	0.0035	0	0	0	0	0.0001	0	0	0	0.0002	0	0	0.0001	0	0.0001	0	0.0003	0.0004	0	0.0003	0	0.0001	0.0004	0.0001	0.0004	0.0004	0	0	0	0	0.0004	0.0003	0.0004	0.0004	0.0004
317	0.4299	0.409	0.4291	0.4249	0.4274	0.1203	0.1159	0.1188	0.1176	0.1128	0.0134	0.0119	0.0127	0.0132	0.0041	0	0	0	0	0.0001	0	0	0	0.0002	0	0	0.0001	0	0.0001	0	0.0003	0.0004	0	0.0003	0	0.0001	0.0004	0.0001	0.0004	0.0004	0	0	0	0	0.0004	0.0003	0.0004	0.0004	0.0004
318	0.4325	0.4114	0.4316	0.4273	0.4299	0.1217	0.117	0.1198	0.1189	0.1141	0.0136	0.012	0.0129	0.0135	0.0042	0	0	0	0	0.0001	0	0	0	0.0002	0	0	0.0001	0	0.0001	0	0.0003	0.0004	0	0.0003	0	0.0001	0.0004	0.0001	0.0004	0.0004	0	0	0	0	0.0004	0.0003	0.0004	0.0004	0.0004
319	0.435	0.4137	0.4342	0.43	0.4325	0.1231	0.1184	0.1213	0.1203	0.1155	0.0139	0.0124	0.0134	0.0138	0.0037	0	0	0	0	0.0001	0	0	0	0.0002	0	0	0.0001	0	0.0001	0	0.0003	0.0004	0	0.0003	0	0.0001	0.0004	0.0001	0.0004	0.0004	0	0	0	0	0.0004	0.0003	0.0004	0.0004	0.0004
320	0.4375	0.4162	0.4369	0.4325	0.4351	0.1246	0.12	0.123	0.1219	0.117	0.0143	0.0126	0.0137	0.0142	0.0047	0	0	0	0	0.0001	0	0	0	0.0002	0	0	0.0001	0	0.0001	0	0.0003	0.0004	0	0.0003	0	0.0001	0.0004	0.0001	0.0004	0.0004	0	0	0	0	0.0004	0.0003	0.0004	0.0004	0.0004
321	0.4402	0.4189	0.4396	0.4352	0.4378	0.1262	0.1214	0.1245	0.1235	0.1186	0.0147	0.013	0.0139	0.0144	0.0048	0	0	0	0	0.0001	0	0	0	0.0002	0	0	0.0001	0	0.0001	0	0.0003	0.0004	0	0.0003	0	0.0001	0.0004	0.0001	0.0004	0.0004	0	0	0	0	0.0004	0.0003	0.0004	0.0004	0.0004
322	0.4428	0.4213	0.4422	0.4377	0.4403	0.1278	0.1231	0.126	0.1248	0.1202	0.0149	0.0133	0.0142	0.0147	0.005	0	0	0	0	0.0001	0	0	0	0.0002	0	0	0.0001	0	0.0001	0	0.0003	0.0004	0	0.0003	0	0.0001	0.0004	0.0001	0.0004	0.0004	0	0	0	0	0.0004	0.0003	0.0004	0.0004	0.0004
323	0.4454	0.4237	0.4447	0.4402	0.4429	0.129	0.1243	0.1273	0.1261	0.1215	0.0153	0.0135	0.0145	0.0152	0.0048	0	0	0	0	0.0001	0	0	0	0.0002	0	0	0.0001	0	0.0001	0	0.0003	0.0004	0	0.0003	0	0.0001	0.0004	0.0001	0.0004	0.0004	0	0	0	0	0.0004	0.0003	0.0004	0.0004	0.0004
324	0.4477	0.4259	0.447	0.4425	0.4452	0.1306	0.1255	0.129	0.1276	0.1228	0.0155	0.0139	0.0148	0.0155	0.0046	0	0	0	0	0.0001	0	0	0	0.0002	0	0	0.0001	0	0.0001	0	0.0003	0.0004	0	0.0003	0	0.0001	0.0004	0.0001	0.0004	0.0004	0	0	0	0	0.0004	0.0003	0.0004	0.0004	0.0004
325	0.45	0.428	0.4493	0.4448	0.4474	0.1317	0.1267	0.1299	0.1287	0.1239	0.0158	0.0142	0.0151	0.0157	0.0058	0	0	0	0	0.0001	0	0	0	0.0002	0	0	0.0001	0	0.0001	0	0.0003	0.0004	0	0.0003	0	0.0001	0.0004	0.0001	0.0004	0.0004	0	0	0	0	0.0004	0.0003	0.0004	0.0004	0.0004
326	0.4524	0.4302	0.4517	0.4471	0.4498	0.1333	0.1281	0.1313	0.13	0.1252	0.0161	0.0145	0.0155	0.016	0.005	0	0	0	0	0.0001	0	0	0	0.0002	0	0	0.0001	0	0.0001	0	0.0003	0.0004	0	0.0003	0	0.0001	0.0004	0.0001	0.0004	0.0004	0	0	0	0	0.0004	0.0003	0.0004	0.0004	0.0004
327	0.4549	0.4326	0.4542	0.4497	0.4522	0.1346	0.1295	0.1328	0.1315	0.1266	0.0165	0.0148	0.0158	0.0164	0.0061	0	0	0	0	0.0001	0	0	0	0.0002	0	0	0.0001	0	0.0001	0	0.0003	0.0004	0	0.0003	0	0.0001	0.0004	0.0001	0.0004	0.0004	0	0	0	0	0.0004	0.0003	0.0004	0.0004	0.0004
328	0.4574	0.4351	0.4566	0.452	0.4547	0.1361	0.1308	0.1342	0.1328	0.128	0.0168	0.0152	0.0162	0.0168	0.0064	0	0	0	0	0.0001	0	0	0	0.0002	0	0	0.0001	0	0.0001	0	0.0003	0.0004	0	0.0003	0	0.0001	0.0004	0.0001	0.0004	0.0004	0	0	0	0	0.0004	0.0003	0.0004	0.0004	0.0004
329	0.4598	0.4373	0.459	0.4545	0.4572	0.1374	0.1323	0.1356	0.1344	0.1293	0.0173	0.0156	0.0165	0.0171	0.0061	0	0	0	0	0.0001	0	0	0	0.0002	0	0	0.0001	0	0.0001	0	0.0003	0.0004	0	0.0003	0	0.0001	0.0004	0.0001	0.0004	0.0004	0	0	0	0	0.0004	0.0003	0.0004	0.0004	0.0004
330	0.4623	0.4397	0.4615	0.457	0.4595	0.1387	0.1334	0.1371	0.1357	0.1307	0.0176	0.0159	0.0168	0.0174	0.0069	0	0	0	0	0.0001	0	0	0	0.0002	0	0	0.0001	0	0.0001	0	0.0003	0.0004	0	0.0003	0	0.0001	0.0004	0.0001	0.0004	0.0004	0	0	0	0	0.0004	0.0003	0.0004	0.0004	0.0004
331	0.4647	0.4419	0.4639	0.4594	0.462	0.1404	0.1353	0.1386	0.1374	0.1321	0.018	0.0163	0.0172	0.0178	0.0071	0	0	0	0	0.0001	0	0	0	0.0002	0	0	0.0001	0	0.0001	0	0.0003	0.0004	0	0.0003	0	0.0001	0.0004	0.0001	0.0004	0.0004	0	0	0	0	0.0004	0.0003	0.0004	0.0004	0.0004
332	0.4671	0.4443	0.4662	0.4616	0.4643	0.1417	0.1362	0.1399	0.1386	0.1335	0.0183	0.0166	0.0174	0.0181	0.0067	0	0	0	0	0.0001	0	0	0	0.0002	0	0	0.0001	0	0.0001	0	0.0003	0.0004	0	0.0003	0	0.0001	0.0004	0.0001	0.0004	0.0004	0	0	0	0	0.0004	0.0003	0.0004	0.0004	0.0004
333	0.4696	0.4466	0.4688	0.4642	0.4668	0.1432	0.138	0.1416	0.1404	0.135	0.0186	0.0169	0.0179	0.0185	0.0078	0	0	0	0	0.0001	0	0	0	0.0002	0	0	0.0001	0	0.0001	0	0.0003	0.0004	0	0.0003	0	0.0001	0.0004	0.0001	0.0004	0.0004	0	0	0	0	0.0004	0.0003	0.0004	0.0004	0.0004
334	0.4718	0.4488	0.471	0.4664	0.4691	0.1447	0.1392	0.1428	0.1415	0.1364	0.019	0.0173	0.0183	0.0189	0.008	0	0	0	0	0.0001	0	0	0	0.0002	0	0	0.0001	0	0.0001	0	0.0003	0.0004	0	0.0003	0	0.0001	0.0004	0.0001	0.0004	0.0004	0	0	0	0	0.0004	0.0003	0.0004	0.0004	0.0004
335	0.4742	0.451	0.4732	0.4687	0.4714	0.1462	0.1408	0.1443	0.1431	0.138	0.0193	0.0176	0.0186	0.0191	0.0082	0	0	0	0	0.0001	0	0	0	0.0002	0	0	0.0001	0	0.0001	0	0.0003	0.0004	0	0.0003	0	0.0001	0.0004	0.0001	0.0004	0.0004	0	0	0	0	0.0004	0.0003	0.0004	0.0004	0.0004
336	0.4767	0.4532	0.4757	0.4711	0.4738	0.1479	0.1424	0.1461	0.1446	0.1393	0.0196	0.0179	0.0189	0.0195	0.0082	0	0	0	0	0.0001	0	0	0	0.0002	0	0	0.0001	0	0.0001	0	0.0003	0.0004	0	0.0003	0	0.0001	0.0004	0.0001	0.0004	0.0004	0	0	0	0	0.0004	0.0003	0.0004	0.0004	0.0004
337	0.479	0.4554	0.4782	0.4735	0.4762	0.1494	0.1439	0.1475	0.1462	0.1409	0.0201	0.0184	0.0194	0.0199	0.0089	0	0	0	0	0.0001	0	0	0	0.0002	0	0	0.0001	0	0.0001	0	0.0003	0.0004	0	0.0003	0	0.0001	0.0004	0.0001	0.0004	0.0004	0	0	0	0	0.0004	0.0003	0.0004	0.0004	0.0004
338	0.4815	0.4578	0.4806	0.476	0.4786	0.1512	0.1456	0.1494	0.148	0.1426	0.0207	0.0188	0.0197	0.0204	0.0092	0	0	0	0	0.0001	0	0	0	0.0002	0	0	0.0001	0	0.0001	0	0.0003	0.0004	0	0.0003	0	0.0001	0.0004	0.0001	0.0004	0.0004	0	0	0	0	0.0004	0.0003	0.0004	0.0004	0.0004
339	0.4841	0.4602	0.4832	0.4786	0.481	0.1529	0.1472	0.1512	0.1497	0.1442	0.0208	0.019	0.0201	0.0207	0.0098	0	0	0	0	0.0001	0	0	0	0.0002	0	0	0.0001	0	0.0001	0	0.0003	0.0004	0	0.0003	0	0.0001	0.0004	0.0001	0.0004	0.0004	0	0	0	0	0.0004	0.0003	0.0004	0.0004	0.0004
340	0.4862	0.4623	0.4853	0.4806	0.4832	0.1545	0.1486	0.1528	0.151	0.1455	0.0214	0.0195	0.0206	0.0211	0.01	0	0	0	0	0.0001	0	0	0	0.0002	0	0	0.0001	0	0.0001	0	0.0003	0.0004	0	0.0003	0	0.0001	0.0004	0.0001	0.0004	0.0004	0	0	0	0	0.0004	0.0003	0.0004	0.0004	0.0004
341	0.4885	0.4645	0.4876	0.483	0.4856	0.156	0.1503	0.1542	0.1527	0.1471	0.0217	0.0198	0.0208	0.0214	0.0101	0	0	0	0	0.0001	0	0	0	0.0002	0	0	0.0001	0	0.0001	0	0.0003	0.0004	0	0.0003	0	0.0001	0.0004	0.0001	0.0004	0.0004	0	0	0	0	0.0004	0.0003	0.0004	0.0004	0.0004
342	0.491	0.4667	0.49	0.4854	0.488	0.1577	0.1519	0.1559	0.1545	0.1488	0.022	0.0202	0.0214	0.0218	0.0099	0	0	0	0	0.0001	0	0	0	0.0002	0	0	0.0001	0	0.0001	0	0.0003	0.0004	0	0.0003	0	0.0001	0.0004	0.0001	0.0004	0.0004	0	0	0	0	0.0004	0.0003	0.0004	0.0004	0.0004
343	0.4932	0.469	0.4923	0.4875	0.4902	0.1593	0.1533	0.1575	0.156	0.1503	0.0226	0.0206	0.0218	0.0224	0.0101	0	0	0	0	0.0001	0	0	0	0.0002	0	0	0.0001	0	0.0001	0	0.0003	0.0004	0	0.0003	0	0.0001	0.0004	0.0001	0.0004	0.0004	0	0	0	0	0.0004	0.0003	0.0004	0.0004	0.0004
344	0.4956	0.4712	0.4946	0.4899	0.4925	0.1613	0.1552	0.1594	0.1578	0.152	0.023	0.021	0.0222	0.0228	0.0107	0	0	0	0	0.0001	0	0	0	0.0002	0	0	0.0001	0	0.0001	0	0.0003	0.0004	0	0.0003	0	0.0001	0.0004	0.0001	0.0004	0.0004	0	0	0	0	0.0004	0.0003	0.0004	0.0004	0.0004
345	0.4978	0.4733	0.497	0.4923	0.495	0.1628	0.1571	0.161	0.1595	0.1539	0.0234	0.0214	0.0226	0.0231	0.011	0	0	0	0	0.0001	0	0	0	0.0002	0	0	0.0001	0	0.0001	0	0.0003	0.0004	0	0.0003	0	0.0001	0.0004	0.0001	0.0004	0.0004	0	0	0	0	0.0004	0.0003	0.0004	0.0004	0.0004
346	0.5002	0.4756	0.4993	0.4946	0.4972	0.1647	0.1588	0.1628	0.1613	0.1553	0.0238	0.0219	0.023	0.0235	0.0111	0	0	0	0	0.0001	0	0	0	0.0002	0	0	0.0001	0	0.0001	0	0.0003	0.0004	0	0.0003	0	0.0001	0.0004	0.0001	0.0004	0.0004	0	0	0	0	0.0004	0.0003	0.0004	0.0004	0.0004
347	0.5026	0.4779	0.5016	0.4969	0.4996	0.1666	0.1605	0.1647	0.1631	0.1572	0.0243	0.0224	0.0234	0.024	0.0112	0	0	0	0	0.0001	0	0	0	0.0002	0	0	0.0001	0	0.0001	0	0.0003	0.0004	0	0.0003	0	0.0001	0.0004	0.0001	0.0004	0.0004	0	0	0	0	0.0004	0.0003	0.0004	0.0004	0.0004
348	0.505	0.48	0.5039	0.4993	0.5018	0.1683	0.1621	0.1665	0.1647	0.1588	0.0246	0.0227	0.0238	0.0244	0.0123	0	0	0	0	0.0001	0	0	0	0.0002	0	0	0.0001	0	0.0001	0	0.0003	0.0004	0	0.0003	0	0.0001	0.0004	0.0001	0.0004	0.0004	0	0	0	0	0.0004	0.0003	0.0004	0.0004	0.0004
349	0.5072	0.4822	0.5062	0.5015	0.5042	0.17	0.1641	0.1682	0.1665	0.1605	0.025	0.0231	0.0242	0.0248	0.0126	0	0	0	0	0.0001	0	0	0	0.0002	0	0	0.0001	0	0.0001	0	0.0003	0.0004	0	0.0003	0	0.0001	0.0004	0.0001	0.0004	0.0004	0	0	0	0	0.0004	0.0003	0.0004	0.0004	0.0004
350	0.5096	0.4844	0.5084	0.5038	0.5063	0.1716	0.1657	0.17	0.1683	0.1623	0.0255	0.0236	0.0246	0.0253	0.0122	0	0	0	0.0001	0.0001	0	0	0	0.0002	0	0	0.0001	0	0.0001	0	0.0003	0.0004	0	0.0003	0	0.0001	0.0004	0.0001	0.0004	0.0004	0	0	0	0	0.0004	0.0003	0.0004	0.0004	0.0004
351	0.5119	0.4866	0.5108	0.5061	0.5087	0.1738	0.1675	0.172	0.1703	0.164	0.0261	0.024	0.0252	0.0259	0.0127	0	0	0	0.0001	0.0001	0	0	0	0.0002	0	0	0.0001	0	0.0001	0	0.0003	0.0004	0	0.0003	0	0.0001	0.0004	0.0001	0.0004	0.0004	0	0	0	0	0.0004	0.0003	0.0004	0.0004	0.0004
352	0.5142	0.4888	0.5131	0.5084	0.511	0.1757	0.1696	0.1739	0.172	0.1658	0.0265	0.0244	0.0257	0.0262	0.0137	0	0	0	0.0001	0.0001	0	0	0	0.0002	0	0	0.0001	0	0.0001	0	0.0003	0.0004	0	0.0003	0	0.0001	0.0004	0.0001	0.0004	0.0004	0	0	0	0	0.0004	0.0003	0.0004	0.0004	0.0004
353	0.5165	0.491	0.5154	0.5107	0.5133	0.1775	0.1713	0.1757	0.1741	0.1676	0.027	0.0249	0.0261	0.0267	0.0139	0	0	0	0.0001	0.0001	0	0	0	0.0002	0	0	0.0001	0	0.0001	0	0.0003	0.0004	0	0.0003	0	0.0001	0.0004	0.0001	0.0004	0.0004	0	0	0	0	0.0004	0.0003	0.0004	0.0004	0.0004
354	0.5188	0.4932	0.5179	0.513	0.5156	0.1795	0.1733	0.1775	0.1759	0.1695	0.0273	0.0253	0.0266	0.0271	0.0143	0	0	0	0.0001	0.0001	0	0	0	0.0002	0	0	0.0001	0	0.0001	0	0.0003	0.0004	0	0.0003	0	0.0001	0.0004	0.0001	0.0004	0.0004	0	0	0	0	0.0004	0.0003	0.0004	0.0004	0.0004
355	0.5212	0.4954	0.5201	0.5153	0.5178	0.1815	0.175	0.1797	0.178	0.1714	0.0279	0.0257	0.027	0.0276	0.0147	0	0	0	0.0002	0.0001	0	0	0	0.0002	0	0	0.0001	0	0.0001	0	0.0003	0.0004	0	0.0003	0	0.0001	0.0004	0.0001	0.0004	0.0004	0	0	0	0	0.0004	0.0003	0.0004	0.0004	0.0004
356	0.5236	0.4977	0.5226	0.5176	0.5203	0.1836	0.1771	0.1817	0.1798	0.1735	0.0284	0.0262	0.0276	0.0281	0.0154	0	0	0	0.0001	0.0001	0	0	0	0.0002	0	0	0.0001	0	0.0001	0	0.0003	0.0004	0	0.0003	0	0.0001	0.0004	0.0001	0.0004	0.0004	0	0	0	0	0.0004	0.0003	0.0004	0.0004	0.0004
357	0.5258	0.4998	0.5247	0.52	0.5224	0.1857	0.1792	0.1838	0.1817	0.1752	0.0288	0.0267	0.0281	0.0285	0.0158	0	0	0	0.0002	0.0001	0	0	0	0.0002	0	0	0.0001	0	0.0001	0	0.0003	0.0004	0	0.0003	0	0.0001	0.0004	0.0001	0.0004	0.0004	0	0	0	0	0.0004	0.0003	0.0004	0.0004	0.0004
358	0.5281	0.5019	0.5269	0.5221	0.5247	0.1876	0.1808	0.1855	0.1836	0.1772	0.0293	0.0272	0.0286	0.029	0.0156	0	0	0	0.0002	0.0001	0	0	0	0.0002	0	0	0.0001	0	0.0001	0	0.0003	0.0004	0	0.0003	0	0.0001	0.0004	0.0001	0.0004	0.0004	0	0	0	0	0.0004	0.0003	0.0004	0.0004	0.0004
359	0.5303	0.5042	0.5294	0.5244	0.527	0.1895	0.1828	0.1876	0.1854	0.179	0.0299	0.0277	0.029	0.0296	0.0166	0	0	0	0.0002	0.0001	0	0	0	0.0002	0	0	0.0001	0	0.0001	0	0.0003	0.0004	0	0.0003	0	0.0001	0.0004	0.0001	0.0004	0.0004	0	0	0	0	0.0004	0.0003	0.0004	0.0004	0.0004
360	0.5327	0.5064	0.5315	0.5268	0.5293	0.1915	0.1848	0.1895	0.1876	0.1813	0.0304	0.0282	0.0296	0.0301	0.0166	0	0	0.0001	0.0003	0.0001	0	0	0	0.0002	0	0	0.0001	0	0.0001	0	0.0003	0.0004	0	0.0003	0	0.0001	0.0004	0.0001	0.0004	0.0004	0	0	0	0	0.0004	0.0003	0.0004	0.0004	0.0004
361	0.535	0.5086	0.5338	0.529	0.5316	0.1935	0.1868	0.1916	0.1897	0.1831	0.0308	0.0287	0.0303	0.0307	0.0168	0	0	0	0.0003	0.0001	0	0	0	0.0002	0	0	0.0001	0	0.0001	0	0.0003	0.0004	0	0.0003	0	0.0001	0.0004	0.0001	0.0004	0.0004	0	0	0	0	0.0004	0.0003	0.0004	0.0004	0.0004
362	0.5372	0.5105	0.5362	0.5312	0.5337	0.1957	0.1889	0.1937	0.1915	0.1848	0.0315	0.0294	0.0308	0.0311	0.0175	0	0	0.0001	0.0004	0.0001	0	0	0	0.0002	0	0	0.0001	0	0.0001	0	0.0003	0.0004	0	0.0003	0	0.0001	0.0004	0.0001	0.0004	0.0004	0	0	0	0	0.0004	0.0003	0.0004	0.0004	0.0004
363	0.5395	0.5127	0.5382	0.5334	0.536	0.1976	0.1908	0.1957	0.1936	0.1868	0.0319	0.0297	0.0314	0.0316	0.0181	0	0	0.0002	0.0004	0.0001	0	0	0	0.0002	0	0	0.0001	0	0.0001	0	0.0003	0.0004	0	0.0003	0	0.0001	0.0004	0.0001	0.0004	0.0004	0	0	0	0	0.0004	0.0003	0.0004	0.0004	0.0004
364	0.5418	0.515	0.5406	0.5357	0.5382	0.1998	0.1927	0.1977	0.1956	0.1889	0.0324	0.0303	0.0318	0.0321	0.0183	0	0	0.0001	0.0004	0.0001	0	0	0	0.0002	0	0	0.0001	0	0.0001	0	0.0003	0.0004	0	0.0003	0	0.0001	0.0004	0.0001	0.0004	0.0004	0	0	0	0	0.0004	0.0003	0.0004	0.0004	0.0004
365	0.5439	0.517	0.5426	0.5378	0.5403	0.2017	0.1948	0.1997	0.1977	0.1907	0.0329	0.0306	0.0322	0.0327	0.0187	0	0	0.0002	0.0004	0.0001	0	0	0	0.0002	0	0	0.0001	0	0.0001	0	0.0003	0.0004	0	0.0003	0	0.0001	0.0004	0.0001	0.0004	0.0004	0	0	0	0	0.0004	0.0003	0.0004	0.0004	0.0004
366	0.5461	0.5191	0.5449	0.54	0.5425	0.2038	0.1968	0.2018	0.1995	0.1927	0.0335	0.0313	0.033	0.0332	0.0188	0	0	0.0002	0.0005	0.0001	0	0	0	0.0002	0	0	0.0001	0	0.0001	0	0.0003	0.0004	0	0.0003	0	0.0001	0.0004	0.0001	0.0004	0.0004	0	0	0	0	0.0004	0.0003	0.0004	0.0004	0.0004
367	0.5484	0.5213	0.5472	0.5422	0.5447	0.2059	0.1988	0.2038	0.2018	0.1947	0.0341	0.0317	0.0334	0.0337	0.0195	0	0	0.0002	0.0005	0.0001	0	0	0	0.0002	0	0	0.0001	0	0.0001	0	0.0003	0.0004	0	0.0003	0	0.0001	0.0004	0.0001	0.0004	0.0004	0	0	0	0	0.0004	0.0003	0.0004	0.0004	0.0004
368	0.5506	0.5233	0.5494	0.5444	0.5469	0.2079	0.2008	0.206	0.2037	0.1968	0.0346	0.0321	0.0338	0.0343	0.0197	0	0	0.0002	0.0005	0.0001	0	0	0	0.0002	0	0	0.0001	0	0.0001	0	0.0003	0.0004	0	0.0003	0	0.0001	0.0004	0.0001	0.0004	0.0004	0	0	0	0	0.0004	0.0003	0.0004	0.0004	0.0004
369	0.5528	0.5255	0.5516	0.5466	0.5491	0.2102	0.2032	0.2083	0.206	0.1989	0.0351	0.0327	0.0345	0.0349	0.0204	0	0	0.0003	0.0006	0.0001	0	0	0	0.0002	0	0	0.0001	0	0.0001	0	0.0003	0.0004	0	0.0003	0	0.0001	0.0004	0.0001	0.0004	0.0004	0	0	0	0	0.0004	0.0003	0.0004	0.0004	0.0004
370	0.555	0.5275	0.5539	0.5487	0.5514	0.2122	0.2052	0.2104	0.2079	0.201	0.0356	0.0332	0.0352	0.0353	0.0205	0	0	0.0003	0.0006	0.0001	0	0	0	0.0002	0	0	0.0001	0	0.0001	0	0.0003	0.0004	0	0.0003	0	0.0001	0.0004	0.0001	0.0004	0.0004	0	0	0	0	0.0004	0.0003	0.0004	0.0004	0.0004
371	0.5572	0.5296	0.556	0.5509	0.5536	0.2148	0.2073	0.2125	0.2103	0.2031	0.0362	0.034	0.0358	0.0361	0.0217	0	0.0002	0.0005	0.0008	0.0001	0	0	0	0.0002	0	0	0.0001	0	0.0001	0	0.0003	0.0004	0	0.0003	0	0.0001	0.0004	0.0001	0.0004	0.0004	0	0	0	0	0.0004	0.0003	0.0004	0.0004	0.0004
372	0.5594	0.5316	0.5581	0.5532	0.5557	0.2167	0.2095	0.2147	0.2122	0.2051	0.0369	0.0343	0.0362	0.0365	0.0216	0	0	0.0004	0.0007	0.0001	0	0	0	0.0002	0	0	0.0001	0	0.0001	0	0.0003	0.0004	0	0.0003	0	0.0001	0.0004	0.0001	0.0004	0.0004	0	0	0	0	0.0004	0.0003	0.0004	0.0004	0.0004
373	0.5616	0.5338	0.5604	0.5554	0.5579	0.2188	0.2115	0.217	0.2144	0.2072	0.0375	0.035	0.0369	0.0373	0.0224	0	0	0.0005	0.0008	0.0001	0	0	0	0.0002	0	0	0.0001	0	0.0001	0	0.0003	0.0004	0	0.0003	0	0.0001	0.0004	0.0001	0.0004	0.0004	0	0	0	0	0.0004	0.0003	0.0004	0.0004	0.0004
374	0.5637	0.5358	0.5626	0.5574	0.5599	0.2211	0.2136	0.2191	0.2166	0.2095	0.038	0.0355	0.0374	0.0377	0.0225	0	0	0.0005	0.0008	0.0001	0	0	0	0.0002	0	0	0.0001	0	0.0001	0	0.0003	0.0004	0	0.0003	0	0.0001	0.0004	0.0001	0.0004	0.0004	0	0	0	0	0.0004	0.0003	0.0004	0.0004	0.0004
375	0.5658	0.5377	0.5648	0.5596	0.5621	0.2233	0.2159	0.2214	0.219	0.2116	0.0387	0.0362	0.0381	0.0385	0.0236	0.0001	0.0002	0.0006	0.0011	0.0001	0	0	0	0.0002	0	0	0.0001	0	0.0001	0	0.0003	0.0004	0	0.0003	0	0.0001	0.0004	0.0001	0.0004	0.0004	0	0	0	0	0.0004	0.0003	0.0004	0.0004	0.0004
376	0.568	0.5399	0.567	0.5618	0.5642	0.2257	0.218	0.2236	0.221	0.2138	0.0393	0.0366	0.0388	0.039	0.0238	0	0.0001	0.0006	0.001	0.0001	0	0	0	0.0002	0	0	0.0001	0	0.0001	0	0.0003	0.0004	0	0.0003	0	0.0001	0.0004	0.0001	0.0004	0.0004	0	0	0	0	0.0004	0.0003	0.0004	0.0004	0.0004
377	0.5701	0.542	0.5691	0.564	0.5664	0.2281	0.2201	0.2259	0.2232	0.216	0.0399	0.0373	0.0394	0.0396	0.0242	0	0.0002	0.0007	0.0011	0.0001	0	0	0	0.0002	0	0	0.0001	0	0.0001	0	0.0003	0.0004	0	0.0003	0	0.0001	0.0004	0.0001	0.0004	0.0004	0	0	0	0	0.0004	0.0003	0.0004	0.0004	0.0004
378	0.5722	0.5439	0.5712	0.5661	0.5685	0.2304	0.2225	0.2281	0.2256	0.218	0.0405	0.0378	0.0398	0.0403	0.0248	0.0001	0.0002	0.0008	0.0012	0.0001	0	0	0	0.0002	0	0	0.0001	0	0.0001	0	0.0003	0.0004	0	0.0003	0	0.0001	0.0004	0.0001	0.0004	0.0004	0	0	0	0	0.0004	0.0003	0.0004	0.0004	0.0004
379	0.5744	0.5458	0.5733	0.5682	0.5706	0.2327	0.2245	0.2305	0.2278	0.2204	0.0411	0.0385	0.0407	0.041	0.0253	0	0.0002	0.0008	0.0012	0.0001	0	0	0	0.0002	0	0	0.0001	0	0.0001	0	0.0003	0.0004	0	0.0003	0	0.0001	0.0004	0.0001	0.0004	0.0004	0	0	0	0	0.0004	0.0003	0.0004	0.0004	0.0004
380	0.5768	0.5482	0.5758	0.5705	0.573	0.2352	0.2271	0.2329	0.2302	0.2229	0.0417	0.0392	0.0414	0.0417	0.0258	0	0.0002	0.0009	0.0013	0.0001	0	0	0	0.0002	0	0	0.0001	0	0.0001	0	0.0003	0.0004	0	0.0003	0	0.0001	0.0004	0.0001	0.0004	0.0004	0	0	0	0	0.0004	0.0003	0.0004	0.0004	0.0004
381	0.5786	0.5499	0.5776	0.5724	0.5748	0.2373	0.2293	0.2351	0.2324	0.2248	0.0426	0.0398	0.0421	0.0422	0.0266	0.0002	0.0004	0.0011	0.0015	0.0001	0	0	0	0.0002	0	0	0.0001	0	0.0001	0	0.0003	0.0004	0	0.0003	0	0.0001	0.0004	0.0001	0.0004	0.0004	0	0	0	0	0.0004	0.0003	0.0004	0.0004	0.0004
382	0.5808	0.5521	0.5797	0.5745	0.5769	0.2395	0.2316	0.2376	0.2348	0.2272	0.0429	0.0403	0.0426	0.0429	0.027	0.0001	0.0002	0.001	0.0014	0.0001	0	0	0	0.0002	0	0	0.0001	0	0.0001	0	0.0003	0.0004	0	0.0003	0	0.0001	0.0004	0.0001	0.0004	0.0004	0	0	0	0	0.0004	0.0003	0.0004	0.0004	0.0004
383	0.5828	0.554	0.5818	0.5765	0.579	0.2423	0.2338	0.2398	0.2369	0.2294	0.0436	0.041	0.0435	0.0435	0.0276	0.0002	0.0003	0.0012	0.0015	0.0001	0	0	0	0.0002	0	0	0.0001	0	0.0001	0	0.0003	0.0004	0	0.0003	0	0.0001	0.0004	0.0001	0.0004	0.0004	0	0	0	0	0.0004	0.0003	0.0004	0.0004	0.0004
384	0.5849	0.556	0.584	0.5786	0.581	0.2444	0.236	0.2422	0.2392	0.2316	0.0444	0.0417	0.044	0.0443	0.0282	0.0003	0.0004	0.0012	0.0017	0.0001	0	0	0	0.0002	0	0	0.0001	0	0.0001	0	0.0003	0.0004	0	0.0003	0	0.0001	0.0004	0.0001	0.0004	0.0004	0	0	0	0	0.0004	0.0003	0.0004	0.0004	0.0004
385	0.5868	0.5578	0.586	0.5807	0.5832	0.2469	0.2383	0.2446	0.2416	0.234	0.0451	0.0422	0.0448	0.0448	0.0288	0.0002	0.0004	0.0013	0.0016	0.0001	0	0	0	0.0002	0	0	0.0001	0	0.0001	0	0.0003	0.0004	0	0.0003	0	0.0001	0.0004	0.0001	0.0004	0.0004	0	0	0	0	0.0004	0.0003	0.0004	0.0004	0.0004
386	0.5891	0.5599	0.5882	0.5827	0.5851	0.2492	0.2406	0.2468	0.244	0.2361	0.0457	0.0431	0.0455	0.0457	0.0292	0.0003	0.0005	0.0014	0.0019	0.0001	0	0	0	0.0002	0	0	0.0001	0	0.0001	0	0.0003	0.0004	0	0.0003	0	0.0001	0.0004	0.0001	0.0004	0.0004	0	0	0	0	0.0004	0.0003	0.0004	0.0004	0.0004
387	0.5912	0.5618	0.5901	0.5847	0.5872	0.2517	0.2429	0.2492	0.2464	0.2383	0.0465	0.0437	0.0461	0.0462	0.0298	0.0002	0.0004	0.0014	0.0018	0.0001	0	0	0	0.0002	0	0	0.0001	0	0.0001	0	0.0003	0.0004	0	0.0003	0	0.0001	0.0004	0.0001	0.0004	0.0004	0	0	0	0	0.0004	0.0003	0.0004	0.0004	0.0004
388	0.5932	0.5638	0.5922	0.5867	0.5892	0.254	0.2453	0.2517	0.2487	0.2408	0.0472	0.0443	0.0469	0.047	0.0304	0.0003	0.0004	0.0015	0.002	0.0001	0	0	0	0.0002	0	0	0.0001	0	0.0001	0	0.0003	0.0004	0	0.0003	0	0.0001	0.0004	0.0001	0.0004	0.0004	0	0	0	0	0.0004	0.0003	0.0004	0.0004	0.0004
389	0.5952	0.5657	0.5942	0.5888	0.5912	0.2563	0.2474	0.254	0.2512	0.243	0.0478	0.0448	0.0474	0.0477	0.0309	0.0003	0.0005	0.0016	0.002	0.0001	0	0	0	0.0002	0	0	0.0001	0	0.0001	0	0.0003	0.0004	0	0.0003	0	0.0001	0.0004	0.0001	0.0004	0.0004	0	0	0	0	0.0004	0.0003	0.0004	0.0004	0.0004
390	0.5972	0.5677	0.5962	0.5908	0.5933	0.259	0.25	0.2563	0.2536	0.2455	0.0486	0.0457	0.0483	0.0485	0.0317	0.0004	0.0005	0.0017	0.0022	0.0001	0	0	0	0.0002	0	0	0.0001	0	0.0001	0	0.0003	0.0004	0	0.0003	0	0.0001	0.0004	0.0001	0.0004	0.0004	0	0	0	0	0.0004	0.0003	0.0004	0.0004	0.0004
391	0.5991	0.5693	0.5981	0.5927	0.5952	0.2613	0.2521	0.2586	0.2558	0.2476	0.0491	0.0462	0.0488	0.0492	0.0322	0.0004	0.0005	0.0017	0.0022	0.0001	0	0	0	0.0002	0	0	0.0001	0	0.0001	0	0.0003	0.0004	0	0.0003	0	0.0001	0.0004	0.0001	0.0004	0.0004	0	0	0	0	0.0004	0.0003	0.0004	0.0004	0.0004
392	0.6013	0.5714	0.6003	0.5949	0.5974	0.2639	0.2548	0.2613	0.2584	0.2502	0.0502	0.0472	0.0499	0.05	0.033	0.0005	0.0007	0.0018	0.0024	0.0001	0	0	0	0.0002	0	0	0.0001	0	0.0001	0	0.0003	0.0004	0	0.0003	0	0.0001	0.0004	0.0001	0.0004	0.0004	0	0	0	0	0.0004	0.0003	0.0004	0.0004	0.0004
393	0.6033	0.5733	0.6022	0.5968	0.5993	0.2663	0.257	0.2636	0.2607	0.2526	0.0508	0.0478	0.0505	0.0507	0.0334	0.0005	0.0007	0.0019	0.0025	0.0001	0	0	0	0.0002	0	0	0.0001	0	0.0001	0	0.0003	0.0004	0	0.0003	0	0.0001	0.0004	0.0001	0.0004	0.0004	0	0	0	0	0.0004	0.0003	0.0004	0.0004	0.0004
394	0.6052	0.5751	0.6043	0.5988	0.6013	0.269	0.2592	0.266	0.2632	0.2549	0.0514	0.0486	0.0513	0.0512	0.0338	0.0005	0.0007	0.002	0.0025	0.0001	0	0	0	0.0002	0	0	0.0001	0	0.0001	0	0.0003	0.0004	0	0.0003	0	0.0001	0.0004	0.0001	0.0004	0.0004	0	0	0	0	0.0004	0.0003	0.0004	0.0004	0.0004
395	0.6073	0.577	0.6063	0.6007	0.6033	0.2714	0.2617	0.2687	0.2655	0.2571	0.0522	0.0492	0.0521	0.0521	0.0347	0.0006	0.0007	0.0021	0.0027	0.0001	0	0	0	0.0002	0	0	0.0001	0	0.0001	0	0.0003	0.0004	0	0.0003	0	0.0001	0.0004	0.0001	0.0004	0.0004	0	0	0	0	0.0004	0.0003	0.0004	0.0004	0.0004
396	0.6092	0.5788	0.6082	0.6027	0.6052	0.2738	0.264	0.271	0.2679	0.2596	0.0531	0.0499	0.0528	0.053	0.0359	0.0007	0.0008	0.0022	0.0028	0.0001	0	0	0	0.0002	0	0	0.0001	0	0.0001	0	0.0003	0.0004	0	0.0003	0	0.0001	0.0004	0.0001	0.0004	0.0004	0	0	0	0	0.0004	0.0003	0.0004	0.0004	0.0004
397	0.6112	0.5809	0.6102	0.6047	0.6072	0.2763	0.2664	0.2734	0.2706	0.262	0.0538	0.0507	0.0536	0.0536	0.0358	0.0007	0.0009	0.0023	0.0028	0.0001	0	0	0	0.0002	0	0	0.0001	0	0.0001	0	0.0003	0.0004	0	0.0003	0	0.0001	0.0004	0.0001	0.0004	0.0004	0	0	0	0	0.0004	0.0003	0.0004	0.0004	0.0004
398	0.6131	0.5827	0.6121	0.6066	0.609	0.2788	0.2689	0.2758	0.273	0.2644	0.0545	0.0513	0.0545	0.0544	0.0368	0.0008	0.0009	0.0024	0.003	0.0001	0	0	0	0.0002	0	0	0.0001	0	0.0001	0	0.0003	0.0004	0	0.0003	0	0.0001	0.0004	0.0001	0.0004	0.0004	0	0	0	0	0.0004	0.0003	0.0004	0.0004	0.0004
399	0.6151	0.5846	0.6142	0.6086	0.611	0.2814	0.2713	0.2783	0.2753	0.2666	0.0553	0.0522	0.0552	0.0553	0.0373	0.0008	0.0008	0.0025	0.003	0.0001	0	0	0	0.0002	0	0	0.0001	0	0.0001	0	0.0003	0.0004	0	0.0003	0	0.0001	0.0004	0.0001	0.0004	0.0004	0	0	0	0	0.0004	0.0003	0.0004	0.0004	0.0004
400	0.617	0.5864	0.6162	0.6105	0.6129	0.2837	0.2736	0.2808	0.2778	0.2692	0.0561	0.0531	0.0559	0.0561	0.0381	0.0008	0.0009	0.0025	0.0031	0.0001	0	0	0	0.0002	0	0	0.0001	0	0.0001	0	0.0003	0.0004	0	0.0003	0	0.0001	0.0004	0.0001	0.0004	0.0004	0	0	0	0	0.0004	0.0003	0.0004	0.0004	0.0004
401	0.6189	0.5881	0.6179	0.6123	0.6148	0.2861	0.276	0.2833	0.28	0.2714	0.0568	0.0537	0.0567	0.0568	0.0389	0.0008	0.0008	0.0026	0.0032	0.0001	0	0	0	0.0002	0	0	0.0001	0	0.0001	0	0.0003	0.0004	0	0.0003	0	0.0001	0.0004	0.0001	0.0004	0.0004	0	0	0	0	0.0004	0.0003	0.0004	0.0004	0.0004
402	0.6209	0.59	0.6199	0.6144	0.6169	0.2888	0.2785	0.2857	0.2826	0.2738	0.0576	0.0547	0.0576	0.0576	0.0396	0.001	0.001	0.0027	0.0034	0.0001	0	0	0	0.0002	0	0	0.0001	0	0.0001	0	0.0003	0.0004	0	0.0003	0	0.0001	0.0004	0.0001	0.0004	0.0004	0	0	0	0	0.0004	0.0003	0.0004	0.0004	0.0004
403	0.6229	0.5919	0.6219	0.6163	0.6187	0.2914	0.2808	0.2882	0.2851	0.2764	0.0585	0.0552	0.0584	0.0584	0.0402	0.001	0.0009	0.0029	0.0034	0.0001	0	0	0	0.0002	0	0	0.0001	0	0.0001	0	0.0003	0.0004	0	0.0003	0	0.0001	0.0004	0.0001	0.0004	0.0004	0	0	0	0	0.0004	0.0003	0.0004	0.0004	0.0004
404	0.6246	0.5936	0.6237	0.6182	0.6206	0.2938	0.2832	0.2909	0.2876	0.2786	0.0593	0.0561	0.0595	0.0593	0.0412	0.001	0.001	0.003	0.0035	0.0001	0	0	0	0.0002	0	0	0.0001	0	0.0001	0	0.0003	0.0004	0	0.0003	0	0.0001	0.0004	0.0001	0.0004	0.0004	0	0	0	0	0.0004	0.0003	0.0004	0.0004	0.0004
405	0.6265	0.5954	0.6256	0.62	0.6225	0.2965	0.2857	0.2932	0.29	0.2814	0.0602	0.0568	0.0601	0.0602	0.0421	0.0011	0.001	0.003	0.0036	0.0001	0	0	0	0.0002	0	0	0.0001	0	0.0001	0	0.0003	0.0004	0	0.0003	0	0.0001	0.0004	0.0001	0.0004	0.0004	0	0	0	0	0.0004	0.0003	0.0004	0.0004	0.0004
406	0.6286	0.5972	0.6275	0.622	0.6244	0.299	0.2881	0.2956	0.2926	0.2836	0.0611	0.0576	0.0611	0.061	0.0429	0.0012	0.001	0.0031	0.0037	0.0001	0	0	0	0.0002	0	0	0.0001	0	0.0001	0	0.0003	0.0004	0	0.0003	0	0.0001	0.0004	0.0001	0.0004	0.0004	0	0	0	0	0.0004	0.0003	0.0004	0.0004	0.0004
407	0.6304	0.599	0.6295	0.6239	0.6262	0.3015	0.2905	0.2982	0.295	0.286	0.0619	0.0584	0.0618	0.0617	0.0435	0.0013	0.0011	0.0032	0.0039	0.0001	0	0	0	0.0002	0	0	0.0001	0	0.0001	0	0.0003	0.0004	0	0.0003	0	0.0001	0.0004	0.0001	0.0004	0.0004	0	0	0	0	0.0004	0.0003	0.0004	0.0004	0.0004
408	0.6323	0.6008	0.6314	0.6257	0.628	0.3041	0.2929	0.3006	0.2974	0.2885	0.0628	0.0595	0.0627	0.0628	0.0445	0.0013	0.0012	0.0033	0.004	0.0001	0	0	0	0.0002	0	0	0.0001	0	0.0001	0	0.0003	0.0004	0	0.0003	0	0.0001	0.0004	0.0001	0.0004	0.0004	0	0	0	0	0.0004	0.0003	0.0004	0.0004	0.0004
409	0.6341	0.6025	0.6332	0.6275	0.63	0.3064	0.2953	0.3031	0.3001	0.2908	0.0635	0.0602	0.0635	0.0634	0.0453	0.0014	0.0012	0.0034	0.0041	0.0001	0	0	0	0.0002	0	0	0.0001	0	0.0001	0	0.0003	0.0004	0	0.0003	0	0.0001	0.0004	0.0001	0.0004	0.0004	0	0	0	0	0.0004	0.0003	0.0004	0.0004	0.0004
410	0.6361	0.6044	0.6351	0.6295	0.6318	0.309	0.2976	0.3058	0.3024	0.2934	0.0645	0.0611	0.0646	0.0646	0.046	0.0015	0.0014	0.0036	0.0042	0.0001	0	0	0	0.0002	0	0	0.0001	0	0.0001	0	0.0003	0.0004	0	0.0003	0	0.0001	0.0004	0.0001	0.0004	0.0004	0	0	0	0	0.0004	0.0003	0.0004	0.0004	0.0004
411	0.638	0.6063	0.6369	0.6314	0.6337	0.3116	0.3	0.3083	0.3049	0.2959	0.0653	0.0619	0.0654	0.0653	0.0471	0.0015	0.0013	0.0037	0.0043	0.0001	0	0	0	0.0002	0	0	0.0001	0	0.0001	0	0.0003	0.0004	0	0.0003	0	0.0001	0.0004	0.0001	0.0004	0.0004	0	0	0	0	0.0004	0.0003	0.0004	0.0004	0.0004
412	0.6399	0.6079	0.6388	0.6332	0.6355	0.3144	0.3025	0.3106	0.3074	0.2982	0.0662	0.0628	0.0663	0.0661	0.0478	0.0015	0.0013	0.0037	0.0043	0.0001	0	0	0	0.0002	0	0	0.0001	0	0.0001	0	0.0003	0.0004	0	0.0003	0	0.0001	0.0004	0.0001	0.0004	0.0004	0	0	0	0	0.0004	0.0003	0.0004	0.0004	0.0004
413	0.6417	0.6098	0.6407	0.6351	0.6374	0.3167	0.3051	0.3132	0.3098	0.3008	0.0672	0.0637	0.0673	0.0672	0.0485	0.0017	0.0013	0.0039	0.0045	0.0001	0	0	0	0.0002	0	0	0.0001	0	0.0001	0	0.0003	0.0004	0	0.0003	0	0.0001	0.0004	0.0001	0.0004	0.0004	0	0	0	0	0.0004	0.0003	0.0004	0.0004	0.0004
414	0.6435	0.6115	0.6424	0.6369	0.6391	0.3192	0.3073	0.3154	0.3123	0.303	0.0681	0.0646	0.0682	0.068	0.0494	0.0018	0.0014	0.004	0.0046	0.0001	0	0	0	0.0002	0	0	0.0001	0	0.0001	0	0.0003	0.0004	0	0.0003	0	0.0001	0.0004	0.0001	0.0004	0.0004	0	0	0	0	0.0004	0.0003	0.0004	0.0004	0.0004
415	0.6454	0.6132	0.6443	0.6387	0.6411	0.3219	0.3099	0.3182	0.3148	0.3055	0.0692	0.0656	0.0692	0.0691	0.0506	0.0018	0.0015	0.0041	0.0048	0.0001	0	0	0	0.0002	0	0	0.0001	0	0.0001	0	0.0003	0.0004	0	0.0003	0	0.0001	0.0004	0.0001	0.0004	0.0004	0	0	0	0	0.0004	0.0003	0.0004	0.0004	0.0004
416	0.6473	0.615	0.6462	0.6405	0.6428	0.3243	0.3122	0.3208	0.3174	0.3078	0.07	0.0665	0.0701	0.07	0.0508	0.0019	0.0016	0.0042	0.0049	0.0001	0	0	0	0.0002	0	0	0.0001	0	0.0001	0	0.0003	0.0004	0	0.0003	0	0.0001	0.0004	0.0001	0.0004	0.0004	0	0	0	0	0.0004	0.0003	0.0004	0.0004	0.0004
417	0.6491	0.6168	0.648	0.6423	0.6446	0.3268	0.3146	0.3233	0.3198	0.3104	0.0709	0.0672	0.0709	0.0708	0.0521	0.0019	0.0017	0.0044	0.0049	0.0001	0	0	0	0.0002	0	0	0.0001	0	0.0001	0	0.0003	0.0004	0	0.0003	0	0.0001	0.0004	0.0001	0.0004	0.0004	0	0	0	0	0.0004	0.0003	0.0004	0.0004	0.0004
418	0.6509	0.6184	0.6498	0.6441	0.6464	0.3294	0.3169	0.3257	0.3223	0.3127	0.0719	0.0683	0.0719	0.0718	0.053	0.002	0.0017	0.0044	0.0051	0.0001	0	0	0	0.0002	0	0	0.0001	0	0.0001	0	0.0003	0.0004	0	0.0003	0	0.0001	0.0004	0.0001	0.0004	0.0004	0	0	0	0	0.0004	0.0003	0.0004	0.0004	0.0004
419	0.6528	0.6201	0.6517	0.646	0.6483	0.3321	0.3194	0.3283	0.3248	0.3151	0.073	0.0694	0.0731	0.0729	0.0537	0.0022	0.0018	0.0046	0.0053	0.0001	0	0	0	0.0002	0	0	0.0001	0	0.0001	0	0.0003	0.0004	0	0.0003	0	0.0001	0.0004	0.0001	0.0004	0.0004	0	0	0	0	0.0004	0.0003	0.0004	0.0004	0.0004
420	0.6546	0.6219	0.6534	0.6478	0.65	0.3345	0.322	0.3307	0.3275	0.3175	0.074	0.0701	0.0741	0.074	0.0548	0.0022	0.0019	0.0048	0.0054	0.0001	0	0	0	0.0002	0	0	0.0001	0	0.0001	0	0.0003	0.0004	0	0.0003	0	0.0001	0.0004	0.0001	0.0004	0.0004	0	0	0	0	0.0004	0.0003	0.0004	0.0004	0.0004
421	0.6564	0.6236	0.6554	0.6496	0.6518	0.3371	0.3244	0.3332	0.3298	0.32	0.0748	0.0713	0.075	0.0746	0.0556	0.0023	0.0018	0.0049	0.0055	0.0001	0	0	0	0.0002	0	0	0.0001	0	0.0001	0	0.0003	0.0004	0	0.0003	0	0.0001	0.0004	0.0001	0.0004	0.0004	0	0	0	0	0.0004	0.0003	0.0004	0.0004	0.0004
422	0.6581	0.6253	0.6571	0.6513	0.6536	0.3397	0.3266	0.3356	0.3323	0.3224	0.0758	0.0721	0.0761	0.0757	0.0567	0.0025	0.0019	0.005	0.0057	0.0001	0	0	0	0.0002	0	0	0.0001	0	0.0001	0	0.0003	0.0004	0	0.0003	0	0.0001	0.0004	0.0001	0.0004	0.0004	0	0	0	0	0.0004	0.0003	0.0004	0.0004	0.0004
423	0.66	0.6271	0.6589	0.6531	0.6554	0.3422	0.329	0.3382	0.3348	0.3249	0.0768	0.0731	0.0771	0.0768	0.0573	0.0026	0.002	0.0052	0.0058	0.0001	0	0	0	0.0002	0	0	0.0001	0	0.0001	0	0.0003	0.0004	0	0.0003	0	0.0001	0.0004	0.0001	0.0004	0.0004	0	0	0	0	0.0004	0.0003	0.0004	0.0004	0.0004
424	0.6618	0.6287	0.6606	0.6549	0.6571	0.3447	0.3316	0.3407	0.3372	0.3273	0.0779	0.0741	0.0782	0.0778	0.0587	0.0026	0.0022	0.0053	0.0059	0.0001	0	0	0	0.0002	0	0	0.0001	0	0.0001	0	0.0003	0.0004	0	0.0003	0	0.0001	0.0004	0.0001	0.0004	0.0004	0	0	0	0	0.0004	0.0003	0.0004	0.0004	0.0004
425	0.6635	0.6304	0.6624	0.6567	0.6589	0.3471	0.3338	0.3433	0.3396	0.3297	0.0789	0.0751	0.0793	0.0788	0.059	0.0028	0.0024	0.0055	0.0062	0.0001	0	0	0	0.0002	0	0	0.0001	0	0.0001	0	0.0003	0.0004	0	0.0003	0	0.0001	0.0004	0.0001	0.0004	0.0004	0	0	0	0	0.0004	0.0003	0.0004	0.0004	0.0004
426	0.6653	0.6321	0.6642	0.6584	0.6606	0.3496	0.3364	0.3458	0.3422	0.3321	0.0799	0.0762	0.0802	0.0798	0.0603	0.0029	0.0024	0.0057	0.0063	0.0001	0	0	0	0.0002	0	0	0.0001	0	0.0001	0	0.0003	0.0004	0	0.0003	0	0.0001	0.0004	0.0001	0.0004	0.0004	0	0	0	0	0.0004	0.0003	0.0004	0.0004	0.0004
427	0.6671	0.6338	0.6659	0.6601	0.6623	0.3524	0.3388	0.3483	0.3446	0.3345	0.0811	0.0772	0.0812	0.081	0.0613	0.0031	0.0025	0.0059	0.0065	0.0001	0	0	0	0.0002	0	0	0.0001	0	0.0001	0	0.0003	0.0004	0	0.0003	0	0.0001	0.0004	0.0001	0.0004	0.0004	0	0	0	0	0.0004	0.0003	0.0004	0.0004	0.0004
428	0.669	0.6356	0.6678	0.662	0.6643	0.355	0.3413	0.3508	0.3472	0.3371	0.0823	0.0783	0.0824	0.082	0.0626	0.0033	0.0028	0.0061	0.0067	0.0001	0	0	0	0.0002	0	0	0.0001	0	0.0001	0	0.0003	0.0004	0	0.0003	0	0.0001	0.0004	0.0001	0.0004	0.0004	0	0	0	0	0.0004	0.0003	0.0004	0.0004	0.0004
429	0.6705	0.6372	0.6694	0.6636	0.6657	0.3572	0.3434	0.3532	0.3496	0.3393	0.0832	0.0792	0.0834	0.0831	0.0629	0.0034	0.0028	0.0062	0.0068	0.0001	0	0	0	0.0002	0	0	0.0001	0	0.0001	0	0.0003	0.0004	0	0.0003	0	0.0001	0.0004	0.0001	0.0004	0.0004	0	0	0	0	0.0004	0.0003	0.0004	0.0004	0.0004
430	0.6724	0.6387	0.6711	0.6654	0.6676	0.3597	0.3459	0.3555	0.3519	0.3417	0.0841	0.0801	0.0844	0.084	0.0638	0.0035	0.0028	0.0063	0.0069	0.0001	0	0	0	0.0002	0	0	0.0001	0	0.0001	0	0.0003	0.0004	0	0.0003	0	0.0001	0.0004	0.0001	0.0004	0.0004	0	0	0	0	0.0004	0.0003	0.0004	0.0004	0.0004
431	0.6739	0.6403	0.6729	0.667	0.6692	0.3619	0.3481	0.3581	0.3541	0.3438	0.0852	0.0811	0.0855	0.085	0.0648	0.0035	0.0029	0.0065	0.0071	0.0001	0	0	0	0.0002	0	0	0.0001	0	0.0001	0	0.0003	0.0004	0	0.0003	0	0.0001	0.0004	0.0001	0.0004	0.0004	0	0	0	0	0.0004	0.0003	0.0004	0.0004	0.0004
432	0.6758	0.6421	0.6746	0.6688	0.671	0.3644	0.3503	0.3604	0.3566	0.3462	0.0862	0.082	0.0866	0.0862	0.0657	0.0037	0.0031	0.0067	0.0073	0.0001	0	0	0	0.0002	0	0	0.0001	0	0.0001	0	0.0003	0.0004	0	0.0003	0	0.0001	0.0004	0.0001	0.0004	0.0004	0	0	0	0	0.0004	0.0003	0.0004	0.0004	0.0004
433	0.6774	0.6436	0.6762	0.6704	0.6725	0.3671	0.3529	0.3628	0.3591	0.3487	0.0873	0.0833	0.0874	0.0873	0.0667	0.0039	0.0032	0.0069	0.0075	0.0001	0	0	0	0.0002	0	0	0.0001	0	0.0001	0	0.0003	0.0004	0	0.0003	0	0.0001	0.0004	0.0001	0.0004	0.0004	0	0	0	0	0.0004	0.0003	0.0004	0.0004	0.0004
434	0.6791	0.6453	0.678	0.6721	0.6744	0.3695	0.3552	0.3653	0.3616	0.3511	0.0885	0.0845	0.0888	0.0884	0.0678	0.004	0.0035	0.007	0.0077	0.0001	0	0	0	0.0002	0	0	0.0001	0	0.0001	0	0.0003	0.0004	0	0.0003	0	0.0001	0.0004	0.0001	0.0004	0.0004	0	0	0	0	0.0004	0.0003	0.0004	0.0004	0.0004
435	0.6808	0.6468	0.6797	0.6738	0.6759	0.3719	0.3575	0.3679	0.364	0.3535	0.0897	0.0855	0.0899	0.0894	0.0687	0.0043	0.0038	0.0073	0.008	0.0001	0	0	0	0.0002	0	0	0.0001	0	0.0001	0	0.0003	0.0004	0	0.0003	0	0.0001	0.0004	0.0001	0.0004	0.0004	0	0	0	0	0.0004	0.0003	0.0004	0.0004	0.0004
436	0.6824	0.6482	0.6811	0.6754	0.6775	0.3743	0.3597	0.3702	0.3663	0.3557	0.0906	0.0864	0.0909	0.0904	0.0697	0.0045	0.0038	0.0074	0.0081	0.0001	0	0	0	0.0002	0	0	0.0001	0	0.0001	0	0.0003	0.0004	0	0.0003	0	0.0001	0.0004	0.0001	0.0004	0.0004	0	0	0	0	0.0004	0.0003	0.0004	0.0004	0.0004
437	0.6841	0.65	0.6829	0.6771	0.6792	0.3766	0.3621	0.3725	0.3687	0.3581	0.0917	0.0876	0.0921	0.0916	0.0706	0.0047	0.0041	0.0077	0.0083	0.0001	0	0	0	0.0002	0	0	0.0001	0	0.0001	0	0.0003	0.0004	0	0.0003	0	0.0001	0.0004	0.0001	0.0004	0.0004	0	0	0	0	0.0004	0.0003	0.0004	0.0004	0.0004
438	0.6858	0.6516	0.6847	0.6788	0.681	0.3793	0.3646	0.3751	0.3713	0.3607	0.0929	0.0887	0.0933	0.0927	0.0722	0.0048	0.0042	0.008	0.0085	0.0001	0	0	0	0.0002	0	0	0.0001	0	0.0001	0	0.0003	0.0004	0	0.0003	0	0.0001	0.0004	0.0001	0.0004	0.0004	0	0	0	0	0.0004	0.0003	0.0004	0.0004	0.0004
439	0.6875	0.6532	0.6862	0.6804	0.6825	0.3817	0.3669	0.3775	0.3735	0.363	0.0938	0.0897	0.0944	0.0939	0.0729	0.005	0.0044	0.008	0.0087	0.0001	0	0	0	0.0002	0	0	0.0001	0	0.0001	0	0.0003	0.0004	0	0.0003	0	0.0001	0.0004	0.0001	0.0004	0.0004	0	0	0	0	0.0004	0.0003	0.0004	0.0004	0.0004
440	0.6893	0.6548	0.688	0.6822	0.6843	0.3843	0.3692	0.38	0.376	0.3655	0.0952	0.0909	0.0956	0.0951	0.0741	0.0051	0.0046	0.0083	0.0089	0.0001	0	0	0	0.0002	0	0	0.0001	0	0.0001	0	0.0003	0.0004	0	0.0003	0	0.0001	0.0004	0.0001	0.0004	0.0004	0	0	0	0	0.0004	0.0003	0.0004	0.0004	0.0004
441	0.6908	0.6563	0.6895	0.6838	0.6859	0.3866	0.3714	0.3823	0.3784	0.3676	0.0965	0.092	0.0967	0.0962	0.0751	0.0054	0.0048	0.0085	0.0091	0.0001	0	0	0	0.0002	0	0	0.0001	0	0.0001	0	0.0003	0.0004	0	0.0003	0	0.0001	0.0004	0.0001	0.0004	0.0004	0	0	0	0	0.0004	0.0003	0.0004	0.0004	0.0004
442	0.6925	0.658	0.6912	0.6854	0.6875	0.3891	0.3738	0.385	0.3809	0.3701	0.0977	0.0934	0.098	0.0974	0.0765	0.0057	0.005	0.0088	0.0094	0.0001	0	0	0	0.0002	0	0	0.0001	0	0.0001	0	0.0003	0.0004	0	0.0003	0	0.0001	0.0004	0.0001	0.0004	0.0004	0	0	0	0	0.0004	0.0003	0.0004	0.0004	0.0004
443	0.694	0.6594	0.6928	0.6871	0.6891	0.3915	0.3761	0.3872	0.3832	0.3724	0.0989	0.0946	0.0992	0.0984	0.0772	0.0058	0.0053	0.009	0.0096	0.0001	0	0	0	0.0002	0	0	0.0001	0	0.0001	0	0.0003	0.0004	0	0.0003	0	0.0001	0.0004	0.0001	0.0004	0.0004	0	0	0	0	0.0004	0.0003	0.0004	0.0004	0.0004
444	0.6957	0.661	0.6944	0.6886	0.6908	0.3942	0.3785	0.3897	0.3857	0.3749	0.0999	0.0956	0.1004	0.0999	0.0789	0.0061	0.0054	0.0092	0.0099	0.0001	0	0	0	0.0002	0	0	0.0001	0	0.0001	0	0.0003	0.0004	0	0.0003	0	0.0001	0.0004	0.0001	0.0004	0.0004	0	0	0	0	0.0004	0.0003	0.0004	0.0004	0.0004
445	0.6972	0.6624	0.6961	0.6902	0.6923	0.3965	0.3809	0.392	0.3879	0.3771	0.1009	0.0966	0.1015	0.1007	0.0795	0.0062	0.0056	0.0094	0.0101	0.0001	0	0	0	0.0002	0	0	0.0001	0	0.0001	0	0.0003	0.0004	0	0.0003	0	0.0001	0.0004	0.0001	0.0004	0.0004	0	0	0	0	0.0004	0.0003	0.0004	0.0004	0.0004
446	0.699	0.664	0.6977	0.6919	0.694	0.3992	0.3834	0.3945	0.3905	0.3795	0.1024	0.098	0.103	0.1021	0.0811	0.0065	0.0059	0.0097	0.0103	0.0001	0	0	0	0.0002	0	0	0.0001	0	0.0001	0	0.0003	0.0004	0	0.0003	0	0.0001	0.0004	0.0001	0.0004	0.0004	0	0	0	0	0.0004	0.0003	0.0004	0.0004	0.0004
447	0.7004	0.6656	0.6994	0.6935	0.6956	0.4015	0.3856	0.397	0.393	0.382	0.1036	0.0995	0.1044	0.1034	0.0826	0.0067	0.0062	0.01	0.0106	0.0001	0	0	0	0.0002	0	0	0.0001	0	0.0001	0	0.0003	0.0004	0	0.0003	0	0.0001	0.0004	0.0001	0.0004	0.0004	0	0	0	0	0.0004	0.0003	0.0004	0.0004	0.0004
448	0.7021	0.6672	0.701	0.6952	0.6971	0.404	0.388	0.3994	0.3954	0.3843	0.1049	0.1004	0.1054	0.1047	0.0833	0.007	0.0064	0.0102	0.0108	0.0001	0	0	0	0.0002	0	0	0.0001	0	0.0001	0	0.0003	0.0004	0	0.0003	0	0.0001	0.0004	0.0001	0.0004	0.0004	0	0	0	0	0.0004	0.0003	0.0004	0.0004	0.0004
449	0.7036	0.6686	0.7026	0.6968	0.6987	0.4063	0.39	0.4018	0.3977	0.3867	0.1061	0.1017	0.1066	0.1059	0.0847	0.0072	0.0066	0.0104	0.011	0.0001	0	0	0	0.0002	0	0	0.0001	0	0.0001	0	0.0003	0.0004	0	0.0003	0	0.0001	0.0004	0.0001	0.0004	0.0004	0	0	0	0	0.0004	0.0003	0.0004	0.0004	0.0004
450	0.7054	0.6702	0.7042	0.6984	0.7004	0.4088	0.3926	0.4043	0.4002	0.3893	0.1074	0.1029	0.108	0.1072	0.0857	0.0074	0.0067	0.0107	0.0113	0.0001	0	0	0	0.0002	0	0	0.0001	0	0.0001	0	0.0003	0.0004	0	0.0003	0	0.0001	0.0004	0.0001	0.0004	0.0004	0	0	0	0	0.0004	0.0003	0.0004	0.0004	0.0004
451	0.7068	0.6717	0.7058	0.6999	0.702	0.4112	0.395	0.4067	0.4026	0.3916	0.1087	0.1042	0.1093	0.1084	0.0873	0.0077	0.0069	0.0108	0.0116	0.0001	0	0	0	0.0002	0	0	0.0001	0	0.0001	0	0.0003	0.0004	0	0.0003	0	0.0001	0.0004	0.0001	0.0004	0.0004	0	0	0	0	0.0004	0.0003	0.0004	0.0004	0.0004
452	0.7086	0.6732	0.7075	0.7016	0.7036	0.4139	0.3973	0.4092	0.4051	0.3938	0.1101	0.1056	0.1108	0.1098	0.0887	0.008	0.0073	0.0113	0.0118	0.0001	0	0	0	0.0002	0	0	0.0001	0	0.0001	0	0.0003	0.0004	0	0.0003	0	0.0001	0.0004	0.0001	0.0004	0.0004	0	0	0	0	0.0004	0.0003	0.0004	0.0004	0.0004
453	0.7102	0.6748	0.7091	0.7032	0.7052	0.4162	0.3996	0.4116	0.4075	0.3963	0.1112	0.1069	0.112	0.1111	0.0898	0.0082	0.0076	0.0116	0.0123	0.0001	0	0	0	0.0002	0	0	0.0001	0	0.0001	0	0.0003	0.0004	0	0.0003	0	0.0001	0.0004	0.0001	0.0004	0.0004	0	0	0	0	0.0004	0.0003	0.0004	0.0004	0.0004
454	0.7118	0.6763	0.7107	0.7048	0.7068	0.4186	0.402	0.4141	0.4098	0.3986	0.1126	0.1082	0.1134	0.1124	0.0913	0.0084	0.0077	0.0119	0.0124	0.0001	0	0	0	0.0002	0	0	0.0001	0	0.0001	0	0.0003	0.0004	0	0.0003	0	0.0001	0.0004	0.0001	0.0004	0.0004	0	0	0	0	0.0004	0.0003	0.0004	0.0004	0.0004
455	0.7136	0.678	0.7125	0.7065	0.7085	0.4215	0.4045	0.4168	0.4126	0.4013	0.1143	0.1097	0.1149	0.114	0.0925	0.0087	0.0081	0.0121	0.0128	0.0001	0	0	0	0.0002	0	0	0.0001	0	0.0001	0	0.0003	0.0004	0	0.0003	0	0.0001	0.0004	0.0001	0.0004	0.0004	0	0	0	0	0.0004	0.0003	0.0004	0.0004	0.0004
456	0.7149	0.6793	0.7139	0.708	0.71	0.4237	0.4067	0.419	0.4147	0.4036	0.1154	0.111	0.1161	0.1152	0.0933	0.009	0.0085	0.0123	0.013	0.0001	0	0	0	0.0002	0	0	0.0001	0	0.0001	0	0.0003	0.0004	0	0.0003	0	0.0001	0.0004	0.0001	0.0004	0.0004	0	0	0	0	0.0004	0.0003	0.0004	0.0004	0.0004
457	0.7164	0.6808	0.7154	0.7096	0.7114	0.4261	0.4091	0.4213	0.4172	0.4059	0.1167	0.1122	0.1175	0.1166	0.0946	0.0092	0.0085	0.0126	0.0132	0.0001	0	0	0	0.0002	0	0	0.0001	0	0.0001	0	0.0003	0.0004	0	0.0003	0	0.0001	0.0004	0.0001	0.0004	0.0004	0	0	0	0	0.0004	0.0003	0.0004	0.0004	0.0004
458	0.7182	0.6824	0.7171	0.7111	0.7131	0.4286	0.4114	0.4238	0.4195	0.4083	0.1181	0.1136	0.1189	0.118	0.0961	0.0096	0.009	0.0131	0.0136	0.0001	0	0	0	0.0002	0	0	0.0001	0	0.0001	0	0.0003	0.0004	0	0.0003	0	0.0001	0.0004	0.0001	0.0004	0.0004	0	0	0	0	0.0004	0.0003	0.0004	0.0004	0.0004
459	0.7198	0.6839	0.7187	0.7128	0.7146	0.431	0.4139	0.4264	0.4221	0.4108	0.1196	0.115	0.1205	0.1193	0.0978	0.0099	0.0092	0.0133	0.014	0.0002	0	0	0	0.0002	0	0	0.0001	0	0.0001	0	0.0003	0.0004	0	0.0003	0	0.0001	0.0004	0.0001	0.0004	0.0004	0	0	0	0	0.0004	0.0003	0.0004	0.0004	0.0004
460	0.7213	0.6853	0.7203	0.7143	0.7163	0.4334	0.416	0.4287	0.4244	0.413	0.1211	0.1165	0.1218	0.1208	0.0988	0.0101	0.0095	0.0136	0.0142	0.0002	0	0	0	0.0002	0	0	0.0001	0	0.0001	0	0.0003	0.0004	0	0.0003	0	0.0001	0.0004	0.0001	0.0004	0.0004	0	0	0	0	0.0004	0.0003	0.0004	0.0004	0.0004
461	0.7229	0.6869	0.7219	0.7159	0.7177	0.4358	0.4186	0.4311	0.4269	0.4153	0.1224	0.1178	0.1233	0.122	0.1006	0.0104	0.0098	0.0139	0.0145	0.0003	0	0	0	0.0002	0	0	0.0001	0	0.0001	0	0.0003	0.0004	0	0.0003	0	0.0001	0.0004	0.0001	0.0004	0.0004	0	0	0	0	0.0004	0.0003	0.0004	0.0004	0.0004
462	0.7245	0.6884	0.7234	0.7174	0.7194	0.4384	0.4209	0.4337	0.4294	0.4178	0.1238	0.119	0.1247	0.1234	0.1014	0.0107	0.0101	0.0142	0.0148	0.0004	0	0	0	0.0002	0	0	0.0001	0	0.0001	0	0.0003	0.0004	0	0.0003	0	0.0001	0.0004	0.0001	0.0004	0.0004	0	0	0	0	0.0004	0.0003	0.0004	0.0004	0.0004
463	0.7262	0.69	0.7251	0.7192	0.7211	0.441	0.4234	0.4363	0.432	0.4204	0.1254	0.1207	0.1263	0.1251	0.1032	0.0112	0.0105	0.0148	0.0153	0.0005	0	0	0	0.0002	0	0	0.0001	0	0.0001	0	0.0003	0.0004	0	0.0003	0	0.0001	0.0004	0.0001	0.0004	0.0004	0	0	0	0	0.0004	0.0003	0.0004	0.0004	0.0004
464	0.7276	0.6914	0.7266	0.7206	0.7225	0.4433	0.4255	0.4386	0.4341	0.4228	0.1266	0.1217	0.1276	0.1264	0.104	0.0114	0.0107	0.0149	0.0155	0.0005	0	0	0	0.0002	0	0	0.0001	0	0.0001	0	0.0003	0.0004	0	0.0003	0	0.0001	0.0004	0.0001	0.0004	0.0004	0	0	0	0	0.0004	0.0003	0.0004	0.0004	0.0004
465	0.7291	0.6928	0.7282	0.7221	0.724	0.4458	0.4281	0.441	0.4367	0.425	0.1282	0.1233	0.129	0.1278	0.1055	0.0117	0.0111	0.0153	0.0158	0.0007	0	0	0	0.0002	0	0	0.0001	0	0.0001	0	0.0003	0.0004	0	0.0003	0	0.0001	0.0004	0.0001	0.0004	0.0004	0	0	0	0	0.0004	0.0003	0.0004	0.0004	0.0004
466	0.7307	0.6942	0.7296	0.7237	0.7256	0.4482	0.4302	0.4433	0.4389	0.4274	0.1294	0.1245	0.1304	0.129	0.1073	0.012	0.0114	0.0156	0.0162	0.0007	0	0	0	0.0002	0	0	0.0001	0	0.0001	0	0.0003	0.0004	0	0.0003	0	0.0001	0.0004	0.0001	0.0004	0.0004	0	0	0	0	0.0004	0.0003	0.0004	0.0004	0.0004
467	0.7323	0.6957	0.7312	0.7252	0.727	0.4505	0.4326	0.4458	0.4413	0.4297	0.1309	0.1261	0.1318	0.1306	0.1086	0.0124	0.0118	0.016	0.0166	0.0008	0	0	0	0.0002	0	0	0.0001	0	0.0001	0	0.0003	0.0004	0	0.0003	0	0.0001	0.0004	0.0001	0.0004	0.0004	0	0	0	0	0.0004	0.0003	0.0004	0.0004	0.0004
468	0.7338	0.6972	0.7328	0.7268	0.7286	0.453	0.4348	0.4484	0.4438	0.4322	0.1323	0.1273	0.1332	0.1318	0.1094	0.0128	0.0121	0.0164	0.017	0.001	0	0	0	0.0002	0	0	0.0001	0	0.0001	0	0.0003	0.0004	0	0.0003	0	0.0001	0.0004	0.0001	0.0004	0.0004	0	0	0	0	0.0004	0.0003	0.0004	0.0004	0.0004
469	0.7353	0.699	0.7344	0.7283	0.7302	0.4555	0.4373	0.4508	0.4464	0.4344	0.1337	0.1289	0.1349	0.1335	0.1112	0.0131	0.0124	0.0168	0.0173	0.0011	0	0	0	0.0002	0	0	0.0001	0	0.0001	0	0.0003	0.0004	0	0.0003	0	0.0001	0.0004	0.0001	0.0004	0.0004	0	0	0	0	0.0004	0.0003	0.0004	0.0004	0.0004
470	0.737	0.7003	0.736	0.73	0.7318	0.458	0.4397	0.4532	0.4489	0.4372	0.1352	0.1302	0.1364	0.1352	0.1126	0.0135	0.0128	0.0172	0.0177	0.0013	0	0	0	0.0002	0	0	0.0001	0	0.0001	0	0.0003	0.0004	0	0.0003	0	0.0001	0.0004	0.0001	0.0004	0.0004	0	0	0	0	0.0004	0.0003	0.0004	0.0004	0.0004
471	0.7383	0.7018	0.7373	0.7313	0.7332	0.4603	0.4419	0.4555	0.4511	0.4394	0.1365	0.1316	0.1378	0.1365	0.1138	0.0138	0.0132	0.0175	0.0181	0.0014	0	0	0	0.0002	0	0	0.0001	0	0.0001	0	0.0003	0.0004	0	0.0003	0	0.0001	0.0004	0.0001	0.0004	0.0004	0	0	0	0	0.0004	0.0003	0.0004	0.0004	0.0004
472	0.7399	0.7033	0.7392	0.733	0.7348	0.4627	0.4444	0.4581	0.4535	0.4418	0.138	0.1333	0.1394	0.1382	0.1155	0.0142	0.0137	0.0178	0.0185	0.0015	0	0	0	0.0002	0	0	0.0001	0	0.0001	0	0.0003	0.0004	0	0.0003	0	0.0001	0.0004	0.0001	0.0004	0.0004	0	0	0	0	0.0004	0.0003	0.0004	0.0004	0.0004
473	0.7414	0.7048	0.7407	0.7344	0.7362	0.4652	0.4464	0.4604	0.456	0.4441	0.1397	0.1348	0.1412	0.1396	0.1165	0.0145	0.014	0.0184	0.0189	0.0018	0	0	0	0.0002	0	0	0.0001	0	0.0001	0	0.0003	0.0004	0	0.0003	0	0.0001	0.0004	0.0001	0.0004	0.0004	0	0	0	0	0.0004	0.0003	0.0004	0.0004	0.0004
474	0.743	0.7063	0.7423	0.7361	0.7379	0.4677	0.4492	0.463	0.4583	0.4466	0.1411	0.1364	0.1426	0.1413	0.1187	0.0149	0.0144	0.0188	0.0193	0.002	0	0	0	0.0002	0	0	0.0001	0	0.0001	0	0.0003	0.0004	0	0.0003	0	0.0001	0.0004	0.0001	0.0004	0.0004	0	0	0	0	0.0004	0.0003	0.0004	0.0004	0.0004
475	0.7444	0.7075	0.7435	0.7374	0.7392	0.47	0.4512	0.4652	0.4607	0.4488	0.1426	0.1376	0.1443	0.1426	0.1195	0.0154	0.0149	0.0191	0.0197	0.0022	0	0	0	0.0002	0	0	0.0001	0	0.0001	0	0.0003	0.0004	0	0.0003	0	0.0001	0.0004	0.0001	0.0004	0.0004	0	0	0	0	0.0004	0.0003	0.0004	0.0004	0.0004
476	0.7459	0.709	0.7451	0.7389	0.7408	0.4725	0.4535	0.4677	0.4631	0.4512	0.1442	0.1393	0.146	0.1443	0.1214	0.0156	0.0151	0.0194	0.0201	0.0023	0	0	0	0.0002	0	0	0.0001	0	0.0001	0	0.0003	0.0004	0	0.0003	0	0.0001	0.0004	0.0001	0.0004	0.0004	0	0	0	0	0.0004	0.0003	0.0004	0.0004	0.0004
477	0.7474	0.7105	0.7465	0.7405	0.7422	0.4747	0.4558	0.47	0.4655	0.4535	0.1459	0.1408	0.1475	0.1461	0.1229	0.0161	0.0156	0.0199	0.0204	0.0026	0	0	0	0.0002	0	0	0.0001	0	0.0001	0	0.0003	0.0004	0	0.0003	0	0.0001	0.0004	0.0001	0.0004	0.0004	0	0	0	0	0.0004	0.0003	0.0004	0.0004	0.0004
478	0.7488	0.712	0.7482	0.7419	0.7437	0.4771	0.458	0.4724	0.4679	0.4558	0.1474	0.1424	0.149	0.1477	0.1246	0.0164	0.016	0.0203	0.0209	0.0028	0	0	0	0.0002	0	0	0.0001	0	0.0001	0	0.0003	0.0004	0	0.0003	0	0.0001	0.0004	0.0001	0.0004	0.0004	0	0	0	0	0.0004	0.0003	0.0004	0.0004	0.0004
479	0.7503	0.7132	0.7496	0.7435	0.7452	0.4796	0.4605	0.4748	0.4703	0.4583	0.1489	0.1439	0.1509	0.1492	0.126	0.0168	0.0165	0.0207	0.0212	0.003	0	0	0	0.0002	0	0	0.0001	0	0.0001	0	0.0003	0.0004	0	0.0003	0	0.0001	0.0004	0.0001	0.0004	0.0004	0	0	0	0	0.0004	0.0003	0.0004	0.0004	0.0004
480	0.7518	0.7147	0.751	0.745	0.7466	0.4819	0.4627	0.4771	0.4724	0.4606	0.1506	0.1456	0.1526	0.1509	0.1277	0.0172	0.0169	0.0212	0.0217	0.0032	0	0	0	0.0002	0	0	0.0001	0	0.0001	0	0.0003	0.0004	0	0.0003	0	0.0001	0.0004	0.0001	0.0004	0.0004	0	0	0	0	0.0004	0.0003	0.0004	0.0004	0.0004
481	0.7532	0.7162	0.7527	0.7464	0.748	0.4842	0.4648	0.4794	0.4749	0.4628	0.1521	0.1471	0.1543	0.1526	0.129	0.0176	0.0172	0.0215	0.022	0.0033	0	0	0	0.0002	0	0	0.0001	0	0.0001	0	0.0003	0.0004	0	0.0003	0	0.0001	0.0004	0.0001	0.0004	0.0004	0	0	0	0	0.0004	0.0003	0.0004	0.0004	0.0004
482	0.7547	0.7176	0.754	0.7478	0.7497	0.4868	0.4674	0.4818	0.4772	0.4652	0.154	0.149	0.156	0.1543	0.1311	0.018	0.0177	0.022	0.0225	0.0037	0	0	0	0.0002	0	0	0.0001	0	0.0001	0	0.0003	0.0004	0	0.0003	0	0.0001	0.0004	0.0001	0.0004	0.0004	0	0	0	0	0.0004	0.0003	0.0004	0.0004	0.0004
483	0.7563	0.719	0.7556	0.7495	0.7511	0.4891	0.4696	0.4842	0.4797	0.4675	0.1556	0.1506	0.158	0.1562	0.1325	0.0185	0.0181	0.0224	0.0231	0.004	0	0	0	0.0002	0	0	0.0001	0	0.0001	0	0.0003	0.0004	0	0.0003	0	0.0001	0.0004	0.0001	0.0004	0.0004	0	0	0	0	0.0004	0.0003	0.0004	0.0004	0.0004
484	0.7577	0.7204	0.7571	0.751	0.7524	0.4914	0.4718	0.4866	0.482	0.4698	0.1573	0.1521	0.1595	0.1577	0.1342	0.0189	0.0184	0.0229	0.0234	0.0043	0	0	0	0.0002	0	0	0.0001	0	0.0001	0	0.0003	0.0004	0	0.0003	0	0.0001	0.0004	0.0001	0.0004	0.0004	0	0	0	0	0.0004	0.0003	0.0004	0.0004	0.0004
485	0.759	0.7218	0.7585	0.7522	0.7538	0.4936	0.4738	0.4888	0.4841	0.472	0.1589	0.1538	0.1612	0.1597	0.1357	0.0193	0.019	0.0234	0.0238	0.0044	0	0	0	0.0002	0	0	0.0001	0	0.0001	0	0.0003	0.0004	0	0.0003	0	0.0001	0.0004	0.0001	0.0004	0.0004	0	0	0	0	0.0004	0.0003	0.0004	0.0004	0.0004
486	0.7604	0.7232	0.7599	0.7536	0.7552	0.496	0.4764	0.4912	0.4865	0.4744	0.1606	0.1554	0.1629	0.1613	0.1375	0.0197	0.0194	0.0238	0.0243	0.0049	0	0	0	0.0002	0	0	0.0001	0	0.0001	0	0.0003	0.0004	0	0.0003	0	0.0001	0.0004	0.0001	0.0004	0.0004	0	0	0	0	0.0004	0.0003	0.0004	0.0004	0.0004
487	0.7618	0.7245	0.7615	0.755	0.7567	0.4983	0.4784	0.4935	0.4887	0.4765	0.1625	0.157	0.165	0.163	0.1391	0.0201	0.0199	0.0242	0.0246	0.005	0	0	0	0.0002	0	0	0.0001	0	0.0001	0	0.0003	0.0004	0	0.0003	0	0.0001	0.0004	0.0001	0.0004	0.0004	0	0	0	0	0.0004	0.0003	0.0004	0.0004	0.0004
488	0.7632	0.7258	0.7629	0.7565	0.7581	0.5006	0.4807	0.4958	0.4911	0.4789	0.1642	0.1589	0.1668	0.1649	0.1411	0.0206	0.0204	0.0247	0.0252	0.0053	0	0	0	0.0002	0	0	0.0001	0	0.0001	0	0.0003	0.0004	0	0.0003	0	0.0001	0.0004	0.0001	0.0004	0.0004	0	0	0	0	0.0004	0.0003	0.0004	0.0004	0.0004
489	0.7647	0.7271	0.7641	0.7579	0.7595	0.503	0.4828	0.4982	0.4932	0.4812	0.1658	0.1606	0.1687	0.1666	0.1427	0.0211	0.0208	0.0251	0.0256	0.0056	0	0	0	0.0002	0	0	0.0001	0	0.0001	0	0.0003	0.0004	0	0.0003	0	0.0001	0.0004	0.0001	0.0004	0.0004	0	0	0	0	0.0004	0.0003	0.0004	0.0004	0.0004
490	0.766	0.7286	0.7655	0.7593	0.7608	0.5052	0.485	0.5003	0.4955	0.4834	0.1675	0.1621	0.1704	0.1683	0.144	0.0215	0.0212	0.0257	0.0261	0.0059	0	0	0	0.0002	0	0	0.0001	0	0.0001	0	0.0003	0.0004	0	0.0003	0	0.0001	0.0004	0.0001	0.0004	0.0004	0	0	0	0	0.0004	0.0003	0.0004	0.0004	0.0004
491	0.7674	0.7298	0.7669	0.7607	0.7622	0.5075	0.4873	0.5027	0.4978	0.4855	0.1696	0.1642	0.1724	0.17	0.1461	0.0219	0.0218	0.0261	0.0266	0.0063	0	0	0	0.0002	0	0	0.0001	0	0.0001	0	0.0003	0.0004	0	0.0003	0	0.0001	0.0004	0.0001	0.0004	0.0004	0	0	0	0	0.0004	0.0003	0.0004	0.0004	0.0004
492	0.7687	0.7313	0.7683	0.762	0.7637	0.5099	0.4894	0.505	0.5001	0.4878	0.1714	0.1659	0.1741	0.172	0.1478	0.0223	0.0222	0.0266	0.027	0.0066	0	0	0	0.0002	0	0	0.0001	0	0.0001	0	0.0003	0.0004	0	0.0003	0	0.0001	0.0004	0.0001	0.0004	0.0004	0	0	0	0	0.0004	0.0003	0.0004	0.0004	0.0004
493	0.7703	0.7327	0.7699	0.7636	0.7651	0.5122	0.4918	0.5073	0.5025	0.4902	0.1732	0.1676	0.176	0.1739	0.1496	0.0229	0.0226	0.0271	0.0275	0.007	0	0	0	0.0002	0	0	0.0001	0	0.0001	0	0.0003	0.0004	0	0.0003	0	0.0001	0.0004	0.0001	0.0004	0.0004	0	0	0	0	0.0004	0.0003	0.0004	0.0004	0.0004
494	0.7716	0.734	0.7712	0.7648	0.7664	0.5145	0.4939	0.5095	0.5048	0.4924	0.1751	0.1695	0.1779	0.1758	0.1513	0.0235	0.0233	0.0277	0.028	0.0073	0	0	0	0.0002	0	0	0.0001	0	0.0001	0	0.0003	0.0004	0	0.0003	0	0.0001	0.0004	0.0001	0.0004	0.0004	0	0	0	0	0.0004	0.0003	0.0004	0.0004	0.0004
495	0.7728	0.7352	0.7726	0.7662	0.7678	0.5167	0.4961	0.5118	0.5068	0.4945	0.1771	0.1712	0.1798	0.1776	0.1532	0.0238	0.0237	0.0282	0.0285	0.0077	0	0	0	0.0002	0	0	0.0001	0	0.0001	0	0.0003	0.0004	0	0.0003	0	0.0001	0.0004	0.0001	0.0004	0.0004	0	0	0	0	0.0004	0.0003	0.0004	0.0004	0.0004
496	0.7743	0.7366	0.7741	0.7676	0.7692	0.5189	0.4983	0.514	0.5091	0.4967	0.1787	0.1731	0.1818	0.1795	0.1552	0.0243	0.0242	0.0288	0.0289	0.0081	0	0	0	0.0002	0	0	0.0001	0	0.0001	0	0.0003	0.0004	0	0.0003	0	0.0001	0.0004	0.0001	0.0004	0.0004	0	0	0	0	0.0004	0.0003	0.0004	0.0004	0.0004
497	0.7755	0.7378	0.7754	0.7689	0.7703	0.5212	0.5003	0.5162	0.5113	0.4989	0.1805	0.1747	0.1835	0.1811	0.1568	0.0247	0.0246	0.0291	0.0295	0.0083	0	0	0	0.0002	0	0	0.0001	0	0.0001	0	0.0003	0.0004	0	0.0003	0	0.0001	0.0004	0.0001	0.0004	0.0004	0	0	0	0	0.0004	0.0003	0.0004	0.0004	0.0004
498	0.7769	0.7391	0.7766	0.7702	0.7717	0.5235	0.5026	0.5185	0.5135	0.5011	0.1824	0.1766	0.1854	0.183	0.1589	0.0253	0.0252	0.0296	0.03	0.0087	0	0	0	0.0002	0	0	0.0001	0	0.0001	0	0.0003	0.0004	0	0.0003	0	0.0001	0.0004	0.0001	0.0004	0.0004	0	0	0	0	0.0004	0.0003	0.0004	0.0004	0.0004
499	0.7783	0.7405	0.7781	0.7716	0.773	0.5257	0.5047	0.5207	0.5158	0.5033	0.1844	0.1784	0.1875	0.1849	0.1605	0.0258	0.0257	0.0302	0.0306	0.0091	0	0	0	0.0002	0	0	0.0001	0	0.0001	0	0.0003	0.0004	0	0.0003	0	0.0001	0.0004	0.0001	0.0004	0.0004	0	0	0	0	0.0004	0.0003	0.0004	0.0004	0.0004
500	0.7796	0.7419	0.7795	0.7729	0.7745	0.5281	0.5069	0.5229	0.518	0.5054	0.1863	0.1803	0.1894	0.1869	0.1626	0.0263	0.0264	0.0309	0.0311	0.0096	0	0	0	0.0002	0	0	0.0001	0	0.0001	0	0.0003	0.0004	0	0.0003	0	0.0001	0.0004	0.0001	0.0004	0.0004	0	0	0	0	0.0004	0.0003	0.0004	0.0004	0.0004
501	0.7809	0.743	0.7808	0.7742	0.7758	0.5302	0.5088	0.525	0.5202	0.5075	0.1882	0.1823	0.1914	0.1888	0.1641	0.0268	0.0268	0.0313	0.0317	0.0099	0	0	0	0.0002	0	0	0.0001	0	0.0001	0	0.0003	0.0004	0	0.0003	0	0.0001	0.0004	0.0001	0.0004	0.0004	0	0	0	0	0.0004	0.0003	0.0004	0.0004	0.0004
502	0.7822	0.7444	0.7822	0.7756	0.777	0.5324	0.511	0.5273	0.5224	0.5098	0.1901	0.1843	0.1934	0.1907	0.1662	0.0273	0.0273	0.0319	0.0321	0.0104	0	0	0	0.0002	0	0	0.0001	0	0.0001	0	0.0003	0.0004	0	0.0003	0	0.0001	0.0004	0.0001	0.0004	0.0004	0	0	0	0	0.0004	0.0003	0.0004	0.0004	0.0004
503	0.7835	0.7455	0.7835	0.7769	0.7782	0.5347	0.5131	0.5296	0.5245	0.5118	0.1922	0.1861	0.1954	0.1927	0.1678	0.0279	0.0279	0.0325	0.0328	0.0108	0	0	0	0.0002	0	0	0.0001	0	0.0001	0	0.0003	0.0004	0	0.0003	0	0.0001	0.0004	0.0001	0.0004	0.0004	0	0	0	0	0.0004	0.0003	0.0004	0.0004	0.0004
504	0.785	0.747	0.7849	0.7784	0.7798	0.537	0.5155	0.532	0.5269	0.5142	0.1941	0.188	0.1978	0.1949	0.1699	0.0284	0.0286	0.0331	0.0333	0.0113	0	0	0	0.0002	0	0	0.0001	0	0.0001	0	0.0003	0.0004	0	0.0003	0	0.0001	0.0004	0.0001	0.0004	0.0004	0	0	0	0	0.0004	0.0003	0.0004	0.0004	0.0004
505	0.7862	0.7482	0.7862	0.7795	0.7809	0.539	0.5176	0.534	0.5289	0.5163	0.196	0.1899	0.1996	0.1966	0.1719	0.0289	0.0291	0.0335	0.0339	0.0116	0	0	0	0.0002	0	0	0.0001	0	0.0001	0	0.0003	0.0004	0	0.0003	0	0.0001	0.0004	0.0001	0.0004	0.0004	0	0	0	0	0.0004	0.0003	0.0004	0.0004	0.0004
506	0.7874	0.7494	0.7875	0.7808	0.7822	0.5413	0.5196	0.5362	0.5311	0.5185	0.198	0.1918	0.2018	0.1987	0.1739	0.0295	0.0296	0.0342	0.0345	0.012	0	0	0	0.0002	0	0	0.0001	0	0.0001	0	0.0003	0.0004	0	0.0003	0	0.0001	0.0004	0.0001	0.0004	0.0004	0	0	0	0	0.0004	0.0003	0.0004	0.0004	0.0004
507	0.7887	0.7506	0.7888	0.7821	0.7834	0.5435	0.5217	0.5384	0.5333	0.5205	0.2	0.194	0.2034	0.2007	0.176	0.0301	0.0301	0.0348	0.0349	0.0124	0	0	0	0.0002	0	0	0.0001	0	0.0001	0	0.0003	0.0004	0	0.0003	0	0.0001	0.0004	0.0001	0.0004	0.0004	0	0	0	0	0.0004	0.0003	0.0004	0.0004	0.0004
508	0.7899	0.7518	0.79	0.7833	0.7848	0.5456	0.5237	0.5405	0.5354	0.5226	0.202	0.1958	0.2057	0.2028	0.1776	0.0306	0.0307	0.0353	0.0355	0.0129	0	0	0	0.0002	0	0	0.0001	0	0.0001	0	0.0003	0.0004	0	0.0003	0	0.0001	0.0004	0.0001	0.0004	0.0004	0	0	0	0	0.0004	0.0003	0.0004	0.0004	0.0004
509	0.7913	0.7531	0.7914	0.7847	0.786	0.5479	0.526	0.5428	0.5375	0.5248	0.2042	0.1981	0.2081	0.2048	0.18	0.0313	0.0314	0.036	0.0362	0.0135	0	0	0	0.0002	0	0	0.0001	0	0.0001	0	0.0003	0.0004	0	0.0003	0	0.0001	0.0004	0.0001	0.0004	0.0004	0	0	0	0	0.0004	0.0003	0.0004	0.0004	0.0004
510	0.7925	0.7543	0.7926	0.7859	0.7872	0.5502	0.5279	0.5449	0.5396	0.5268	0.2064	0.1999	0.21	0.2071	0.1819	0.0317	0.032	0.0366	0.0369	0.014	0	0	0.0001	0.0002	0	0	0.0001	0	0.0001	0	0.0003	0.0004	0	0.0003	0	0.0001	0.0004	0.0001	0.0004	0.0004	0	0	0	0	0.0004	0.0003	0.0004	0.0004	0.0004
511	0.7938	0.7556	0.794	0.7874	0.7886	0.5522	0.5301	0.5472	0.5419	0.5292	0.2084	0.2021	0.2122	0.2092	0.1838	0.0324	0.0326	0.0372	0.0374	0.0145	0.0001	0	0.0002	0.0002	0.0001	0	0.0001	0	0.0001	0	0.0003	0.0004	0	0.0003	0	0.0001	0.0004	0.0001	0.0004	0.0004	0	0	0	0	0.0004	0.0003	0.0004	0.0004	0.0004
512	0.795	0.7567	0.7953	0.7886	0.7898	0.5546	0.5322	0.5492	0.544	0.5311	0.2104	0.2041	0.2143	0.2114	0.1859	0.0329	0.0333	0.0379	0.0381	0.0149	0	0	0	0.0002	0	0	0.0001	0	0.0001	0	0.0003	0.0004	0	0.0003	0	0.0001	0.0004	0.0001	0.0004	0.0004	0	0	0	0	0.0004	0.0003	0.0004	0.0004	0.0004
513	0.7963	0.758	0.7966	0.7898	0.7911	0.5566	0.5343	0.5514	0.546	0.5332	0.2127	0.2061	0.2167	0.2135	0.1881	0.0337	0.0337	0.0385	0.0387	0.0154	0.0001	0	0.0002	0.0002	0.0002	0	0.0001	0	0.0001	0	0.0003	0.0004	0	0.0003	0	0.0001	0.0004	0.0001	0.0004	0.0004	0	0	0	0	0.0004	0.0003	0.0004	0.0004	0.0004
514	0.7975	0.7592	0.7978	0.791	0.7923	0.5588	0.5364	0.5535	0.5481	0.5353	0.2148	0.2082	0.2187	0.2155	0.19	0.0341	0.0345	0.039	0.0392	0.016	0.0001	0	0.0002	0.0002	0	0	0.0001	0	0.0001	0	0.0003	0.0004	0	0.0003	0	0.0001	0.0004	0.0001	0.0004	0.0004	0	0	0	0	0.0004	0.0003	0.0004	0.0004	0.0004
515	0.7988	0.7605	0.7991	0.7923	0.7935	0.5609	0.5383	0.5556	0.5504	0.5374	0.2169	0.2107	0.221	0.218	0.1921	0.0348	0.0351	0.0397	0.0398	0.0164	0	0	0.0002	0.0002	0.0001	0	0.0001	0	0.0001	0	0.0003	0.0004	0	0.0003	0	0.0001	0.0004	0.0001	0.0004	0.0004	0	0	0	0	0.0004	0.0003	0.0004	0.0004	0.0004
516	0.8	0.7616	0.8005	0.7937	0.7948	0.563	0.5403	0.5578	0.5525	0.5394	0.2192	0.2127	0.2232	0.2201	0.1943	0.0354	0.0357	0.0403	0.0405	0.017	0.0002	0	0.0003	0.0002	0.0002	0	0.0001	0	0.0001	0	0.0003	0.0004	0	0.0003	0	0.0001	0.0004	0.0001	0.0004	0.0004	0	0	0	0	0.0004	0.0003	0.0004	0.0004	0.0004
517	0.8014	0.763	0.8018	0.7951	0.7962	0.5654	0.5425	0.5601	0.5547	0.5417	0.2215	0.215	0.2257	0.2225	0.1962	0.036	0.0362	0.0409	0.0412	0.0176	0.0002	0	0.0003	0.0002	0.0002	0	0.0001	0	0.0001	0	0.0003	0.0004	0	0.0003	0	0.0001	0.0004	0.0001	0.0004	0.0004	0	0	0	0	0.0004	0.0003	0.0004	0.0004	0.0004
518	0.8028	0.7644	0.8032	0.7964	0.7976	0.5675	0.5447	0.5623	0.5569	0.5438	0.2239	0.2176	0.2282	0.2251	0.1991	0.0368	0.0371	0.0418	0.0419	0.0182	0.0001	0	0.0002	0.0002	0.0001	0	0.0001	0	0.0001	0	0.0003	0.0004	0	0.0003	0	0.0001	0.0004	0.0001	0.0004	0.0004	0	0	0	0	0.0004	0.0003	0.0004	0.0004	0.0004
519	0.8039	0.7655	0.8042	0.7976	0.7987	0.5696	0.5468	0.5644	0.5589	0.546	0.2261	0.2198	0.2304	0.2272	0.2009	0.0373	0.0377	0.0423	0.0426	0.0186	0.0003	0	0.0004	0.0003	0.0003	0	0.0001	0	0.0001	0	0.0003	0.0004	0	0.0003	0	0.0001	0.0004	0.0001	0.0004	0.0004	0	0	0	0	0.0004	0.0003	0.0004	0.0004	0.0004
520	0.8052	0.7667	0.8056	0.7989	0.7999	0.5718	0.5489	0.5667	0.561	0.5482	0.2284	0.222	0.2328	0.2294	0.2034	0.038	0.0382	0.0431	0.0431	0.0191	0.0002	0	0.0004	0.0002	0.0003	0	0.0001	0	0.0001	0	0.0003	0.0004	0	0.0003	0	0.0001	0.0004	0.0001	0.0004	0.0004	0	0	0	0	0.0004	0.0003	0.0004	0.0004	0.0004
521	0.8064	0.768	0.8069	0.8002	0.8012	0.5739	0.5509	0.5687	0.5631	0.5501	0.2307	0.224	0.2352	0.2318	0.2056	0.0387	0.0392	0.0438	0.044	0.0198	0.0002	0	0.0004	0.0003	0.0004	0	0.0001	0	0.0001	0	0.0003	0.0004	0	0.0003	0	0.0001	0.0004	0.0001	0.0004	0.0004	0	0	0	0	0.0004	0.0003	0.0004	0.0004	0.0004
522	0.8077	0.7693	0.8083	0.8014	0.8025	0.5761	0.553	0.5708	0.5653	0.5522	0.233	0.2263	0.2376	0.2342	0.2081	0.0392	0.0395	0.0446	0.0445	0.0205	0.0003	0.0001	0.0005	0.0004	0.0004	0	0.0001	0	0.0001	0	0.0003	0.0004	0	0.0003	0	0.0001	0.0004	0.0001	0.0004	0.0004	0	0	0	0	0.0004	0.0003	0.0004	0.0004	0.0004
523	0.8089	0.7704	0.8095	0.8027	0.8038	0.5783	0.5549	0.573	0.5674	0.5543	0.2354	0.2291	0.2402	0.2367	0.2103	0.04	0.0405	0.0454	0.0452	0.0211	0.0002	0	0.0005	0.0002	0.0004	0	0.0001	0	0.0001	0	0.0003	0.0004	0	0.0003	0	0.0001	0.0004	0.0001	0.0004	0.0004	0	0	0	0	0.0004	0.0003	0.0004	0.0004	0.0004
524	0.81	0.7715	0.8106	0.8037	0.8047	0.5801	0.5567	0.5749	0.5692	0.5561	0.2376	0.2312	0.2422	0.2387	0.2122	0.0407	0.0411	0.0458	0.0459	0.0214	0.0004	0.0001	0.0006	0.0004	0.0006	0	0.0001	0	0.0001	0	0.0003	0.0004	0	0.0003	0	0.0001	0.0004	0.0001	0.0004	0.0004	0	0	0	0	0.0004	0.0003	0.0004	0.0004	0.0004
525	0.8113	0.7726	0.8116	0.8049	0.8059	0.5822	0.5589	0.5768	0.5712	0.558	0.2398	0.2333	0.2446	0.2411	0.2144	0.0412	0.0416	0.0465	0.0466	0.022	0.0003	0	0.0006	0.0003	0.0004	0	0.0001	0	0.0001	0	0.0003	0.0004	0	0.0003	0	0.0001	0.0004	0.0001	0.0004	0.0004	0	0	0	0	0.0004	0.0003	0.0004	0.0004	0.0004
526	0.8123	0.7736	0.8131	0.8061	0.807	0.5843	0.5607	0.579	0.5734	0.56	0.2424	0.2357	0.247	0.2435	0.2167	0.0421	0.0424	0.0473	0.0473	0.0228	0.0005	0.0001	0.0006	0.0005	0.0006	0	0.0001	0	0.0001	0	0.0003	0.0004	0	0.0003	0	0.0001	0.0004	0.0001	0.0004	0.0004	0	0	0	0	0.0004	0.0003	0.0004	0.0004	0.0004
527	0.8137	0.7749	0.8143	0.8073	0.8083	0.5864	0.5627	0.581	0.5754	0.5622	0.2447	0.238	0.2497	0.2461	0.2191	0.0426	0.0432	0.0481	0.048	0.0233	0.0004	0	0.0007	0.0004	0.0006	0	0.0001	0	0.0001	0	0.0003	0.0004	0	0.0003	0	0.0001	0.0004	0.0001	0.0004	0.0004	0	0	0	0	0.0004	0.0003	0.0004	0.0004	0.0004
528	0.8147	0.776	0.8156	0.8085	0.8095	0.5885	0.5647	0.5831	0.5775	0.5641	0.2473	0.2404	0.252	0.2485	0.2213	0.0433	0.0437	0.0488	0.0487	0.0239	0.0006	0.0002	0.0007	0.0005	0.0007	0	0.0001	0	0.0001	0	0.0003	0.0004	0	0.0003	0	0.0001	0.0004	0.0001	0.0004	0.0004	0	0	0	0	0.0004	0.0003	0.0004	0.0004	0.0004
529	0.816	0.7771	0.8167	0.8097	0.8107	0.5905	0.5667	0.5853	0.5795	0.5662	0.2497	0.2425	0.2546	0.2508	0.2238	0.0441	0.0446	0.0496	0.0493	0.0246	0.0006	0.0001	0.0008	0.0005	0.0008	0	0.0001	0	0.0001	0	0.0003	0.0004	0	0.0003	0	0.0001	0.0004	0.0001	0.0004	0.0004	0	0	0	0	0.0004	0.0003	0.0004	0.0004	0.0004
530	0.8172	0.7784	0.8179	0.8109	0.8119	0.5925	0.5686	0.5874	0.5816	0.5681	0.252	0.245	0.257	0.2534	0.2264	0.0449	0.0451	0.0504	0.0502	0.0252	0.0006	0.0001	0.0008	0.0006	0.0008	0	0.0001	0	0.0001	0	0.0003	0.0004	0	0.0003	0	0.0001	0.0004	0.0001	0.0004	0.0004	0	0	0	0	0.0004	0.0003	0.0004	0.0004	0.0004
531	0.8183	0.7795	0.819	0.8121	0.813	0.5946	0.5706	0.5894	0.5835	0.5701	0.2546	0.2475	0.2596	0.2557	0.2286	0.0455	0.0459	0.0509	0.051	0.0259	0.0007	0.0002	0.0009	0.0006	0.0009	0	0.0001	0	0.0001	0	0.0003	0.0004	0	0.0003	0	0.0001	0.0004	0.0001	0.0004	0.0004	0	0	0	0	0.0004	0.0003	0.0004	0.0004	0.0004
532	0.8195	0.7805	0.8202	0.8133	0.8141	0.5965	0.5725	0.5913	0.5854	0.572	0.2572	0.2502	0.2621	0.2581	0.2311	0.0463	0.0468	0.0517	0.0517	0.0264	0.0008	0.0002	0.001	0.0007	0.0009	0	0.0001	0	0.0001	0	0.0003	0.0004	0	0.0003	0	0.0001	0.0004	0.0001	0.0004	0.0004	0	0	0	0	0.0004	0.0003	0.0004	0.0004	0.0004
533	0.8207	0.7817	0.8215	0.8145	0.8154	0.5986	0.5744	0.5933	0.5874	0.574	0.2595	0.2523	0.2646	0.2606	0.2334	0.0468	0.0474	0.0526	0.0523	0.0272	0.0009	0.0003	0.0011	0.0007	0.001	0	0.0001	0	0.0001	0	0.0003	0.0004	0	0.0003	0	0.0001	0.0004	0.0001	0.0004	0.0004	0	0	0	0	0.0004	0.0003	0.0004	0.0004	0.0004
534	0.8218	0.7828	0.8227	0.8157	0.8165	0.6008	0.5765	0.5954	0.5896	0.576	0.262	0.2549	0.2672	0.2632	0.2357	0.0477	0.0483	0.0535	0.0532	0.0279	0.0009	0.0003	0.0011	0.0008	0.0011	0	0.0001	0	0.0001	0	0.0003	0.0004	0	0.0003	0	0.0001	0.0004	0.0001	0.0004	0.0004	0	0	0	0	0.0004	0.0003	0.0004	0.0004	0.0004
535	0.8229	0.7838	0.8238	0.8167	0.8175	0.6026	0.5781	0.5973	0.5914	0.578	0.2643	0.257	0.2696	0.2658	0.2378	0.0486	0.049	0.0541	0.0539	0.0285	0.0011	0.0004	0.0013	0.0009	0.0013	0	0.0001	0	0.0001	0	0.0003	0.0004	0	0.0003	0	0.0001	0.0004	0.0001	0.0004	0.0004	0	0	0	0	0.0004	0.0003	0.0004	0.0004	0.0004
536	0.8242	0.785	0.825	0.8181	0.8188	0.6046	0.5802	0.5994	0.5934	0.5799	0.2672	0.2599	0.2724	0.2682	0.2406	0.0493	0.0498	0.0551	0.0547	0.0293	0.0012	0.0005	0.0014	0.001	0.0014	0	0.0001	0	0.0001	0	0.0003	0.0004	0	0.0003	0	0.0001	0.0004	0.0001	0.0004	0.0004	0	0	0	0	0.0004	0.0003	0.0004	0.0004	0.0004
537	0.8253	0.7862	0.8262	0.8192	0.8199	0.6067	0.5821	0.6014	0.5955	0.5819	0.2697	0.2622	0.2751	0.2708	0.243	0.0499	0.0505	0.0558	0.0554	0.0299	0.0011	0.0004	0.0014	0.0009	0.0013	0	0.0001	0	0.0001	0	0.0003	0.0004	0	0.0003	0	0.0001	0.0004	0.0001	0.0004	0.0004	0	0	0	0	0.0004	0.0003	0.0004	0.0004	0.0004
538	0.8264	0.7872	0.8275	0.8203	0.821	0.6086	0.584	0.6034	0.5974	0.5837	0.2719	0.2643	0.2774	0.2731	0.2458	0.0508	0.0512	0.0566	0.0562	0.0306	0.0013	0.0006	0.0015	0.0011	0.0015	0	0.0001	0	0.0001	0	0.0003	0.0004	0	0.0003	0	0.0001	0.0004	0.0001	0.0004	0.0004	0	0	0	0	0.0004	0.0003	0.0004	0.0004	0.0004
539	0.8275	0.7884	0.8284	0.8214	0.8221	0.6104	0.5857	0.6052	0.5992	0.5855	0.2746	0.2667	0.2798	0.2756	0.248	0.0515	0.052	0.0573	0.0569	0.0313	0.0012	0.0004	0.0015	0.001	0.0015	0	0.0001	0	0.0001	0	0.0003	0.0004	0	0.0003	0	0.0001	0.0004	0.0001	0.0004	0.0004	0	0	0	0	0.0004	0.0003	0.0004	0.0004	0.0004
540	0.8286	0.7894	0.8297	0.8226	0.8232	0.6124	0.5875	0.6071	0.6009	0.5873	0.2768	0.2691	0.2822	0.278	0.2499	0.0523	0.0528	0.0583	0.0578	0.0321	0.0014	0.0005	0.0016	0.0012	0.0016	0	0.0001	0	0.0001	0	0.0003	0.0004	0	0.0003	0	0.0001	0.0004	0.0001	0.0004	0.0004	0	0	0	0	0.0004	0.0003	0.0004	0.0004	0.0004
541	0.8296	0.7904	0.8307	0.8236	0.8243	0.6145	0.5895	0.6092	0.6031	0.5893	0.2795	0.2717	0.2847	0.2805	0.2527	0.053	0.0536	0.0589	0.0586	0.0327	0.0016	0.0008	0.0019	0.0013	0.0018	0	0.0001	0	0.0001	0	0.0003	0.0004	0	0.0003	0	0.0001	0.0004	0.0001	0.0004	0.0004	0	0	0	0	0.0004	0.0003	0.0004	0.0004	0.0004
542	0.8308	0.7915	0.8319	0.8249	0.8255	0.6164	0.5915	0.611	0.605	0.5912	0.2819	0.274	0.2873	0.2831	0.2549	0.054	0.0543	0.0598	0.0594	0.0334	0.0016	0.0008	0.002	0.0014	0.0019	0	0.0001	0	0.0001	0	0.0003	0.0004	0	0.0003	0	0.0001	0.0004	0.0001	0.0004	0.0004	0	0	0	0	0.0004	0.0003	0.0004	0.0004	0.0004
543	0.832	0.7927	0.8331	0.8259	0.8266	0.6184	0.5932	0.613	0.6069	0.593	0.2845	0.2766	0.2902	0.2856	0.2575	0.0548	0.0553	0.0606	0.0602	0.0343	0.0017	0.0008	0.0019	0.0015	0.0019	0	0.0001	0	0.0001	0	0.0003	0.0004	0	0.0003	0	0.0001	0.0004	0.0001	0.0004	0.0004	0	0	0	0	0.0004	0.0003	0.0004	0.0004	0.0004
544	0.833	0.7936	0.8341	0.827	0.8276	0.6202	0.595	0.6149	0.6088	0.5948	0.2871	0.2789	0.2926	0.2882	0.2601	0.0556	0.056	0.0616	0.0611	0.0351	0.0019	0.0009	0.0022	0.0017	0.0021	0	0.0001	0	0.0001	0	0.0003	0.0004	0	0.0003	0	0.0001	0.0004	0.0001	0.0004	0.0004	0	0	0	0	0.0004	0.0003	0.0004	0.0004	0.0004
545	0.834	0.7947	0.8352	0.8281	0.8287	0.6221	0.5969	0.6167	0.6106	0.5967	0.2897	0.2815	0.2952	0.2906	0.2625	0.0562	0.0568	0.0624	0.0619	0.0358	0.0018	0.0008	0.0021	0.0016	0.0021	0	0.0001	0	0.0001	0	0.0003	0.0004	0	0.0003	0	0.0001	0.0004	0.0001	0.0004	0.0004	0	0	0	0	0.0004	0.0003	0.0004	0.0004	0.0004
546	0.8352	0.7958	0.8364	0.8293	0.8299	0.624	0.5987	0.6188	0.6125	0.5985	0.2924	0.2837	0.2978	0.2932	0.265	0.0573	0.0578	0.0633	0.0628	0.0366	0.002	0.0009	0.0023	0.0017	0.0022	0	0.0001	0	0.0001	0	0.0003	0.0004	0	0.0003	0	0.0001	0.0004	0.0001	0.0004	0.0004	0	0	0	0	0.0004	0.0003	0.0004	0.0004	0.0004
547	0.8363	0.7968	0.8374	0.8303	0.8308	0.6258	0.6005	0.6206	0.6144	0.6004	0.2946	0.2861	0.3002	0.2955	0.2674	0.0581	0.0587	0.064	0.0637	0.0372	0.0022	0.0011	0.0024	0.0019	0.0023	0	0.0001	0	0.0001	0	0.0003	0.0004	0	0.0003	0	0.0001	0.0004	0.0001	0.0004	0.0004	0	0	0	0	0.0004	0.0003	0.0004	0.0004	0.0004
548	0.8374	0.7978	0.8385	0.8314	0.8319	0.6278	0.6023	0.6226	0.6162	0.6021	0.2973	0.2887	0.3028	0.2982	0.27	0.0589	0.0595	0.0649	0.0646	0.038	0.0022	0.0012	0.0025	0.002	0.0024	0	0.0001	0	0.0001	0	0.0003	0.0004	0	0.0003	0	0.0001	0.0004	0.0001	0.0004	0.0004	0	0	0	0	0.0004	0.0003	0.0004	0.0004	0.0004
549	0.8383	0.7988	0.8394	0.8324	0.8329	0.6296	0.6041	0.6244	0.618	0.6039	0.2997	0.2908	0.3055	0.3007	0.2724	0.0597	0.0603	0.0659	0.0655	0.0388	0.0022	0.0013	0.0026	0.002	0.0026	0	0.0001	0	0.0001	0	0.0003	0.0004	0	0.0003	0	0.0001	0.0004	0.0001	0.0004	0.0004	0	0	0	0	0.0004	0.0003	0.0004	0.0004	0.0004
550	0.8394	0.7999	0.8408	0.8336	0.834	0.6314	0.6058	0.6262	0.6198	0.6058	0.3025	0.2936	0.3078	0.3033	0.2746	0.0606	0.0611	0.0666	0.0664	0.0397	0.0025	0.0013	0.0027	0.0022	0.0027	0	0.0001	0	0.0001	0	0.0003	0.0004	0	0.0003	0	0.0001	0.0004	0.0001	0.0004	0.0004	0	0	0	0	0.0004	0.0003	0.0004	0.0004	0.0004
551	0.8405	0.8009	0.8419	0.8347	0.8352	0.6334	0.6076	0.6281	0.6217	0.6076	0.305	0.2961	0.3106	0.3058	0.2774	0.0615	0.0621	0.0677	0.0672	0.0405	0.0026	0.0014	0.0028	0.0023	0.0029	0	0.0001	0	0.0001	0	0.0003	0.0004	0	0.0003	0	0.0001	0.0004	0.0001	0.0004	0.0004	0	0	0	0	0.0004	0.0003	0.0004	0.0004	0.0004
552	0.8416	0.8021	0.8429	0.8357	0.8362	0.6353	0.6094	0.63	0.6237	0.6095	0.3076	0.2984	0.3132	0.3084	0.2799	0.0623	0.0628	0.0686	0.0682	0.0412	0.0026	0.0015	0.0029	0.0023	0.0029	0	0.0001	0	0.0001	0	0.0003	0.0004	0	0.0003	0	0.0001	0.0004	0.0001	0.0004	0.0004	0	0	0	0	0.0004	0.0003	0.0004	0.0004	0.0004
553	0.8425	0.8029	0.8439	0.8368	0.8372	0.637	0.6111	0.6318	0.6254	0.6112	0.3101	0.3008	0.3158	0.3107	0.2823	0.0632	0.064	0.0695	0.0691	0.0421	0.0027	0.0016	0.003	0.0024	0.003	0	0.0001	0	0.0001	0	0.0003	0.0004	0	0.0003	0	0.0001	0.0004	0.0001	0.0004	0.0004	0	0	0	0	0.0004	0.0003	0.0004	0.0004	0.0004
554	0.8436	0.8039	0.845	0.838	0.8382	0.6389	0.6129	0.6336	0.6273	0.613	0.3127	0.3032	0.3183	0.3135	0.285	0.0641	0.0649	0.0706	0.0699	0.0429	0.0028	0.0017	0.0032	0.0026	0.0032	0	0.0001	0	0.0001	0	0.0003	0.0004	0	0.0003	0	0.0001	0.0004	0.0001	0.0004	0.0004	0	0	0	0	0.0004	0.0003	0.0004	0.0004	0.0004
555	0.8447	0.805	0.8462	0.8391	0.8393	0.6407	0.6148	0.6355	0.629	0.6147	0.3154	0.3058	0.3207	0.316	0.2872	0.065	0.0657	0.0715	0.0711	0.0439	0.003	0.0018	0.0032	0.0028	0.0032	0	0.0001	0	0.0001	0	0.0003	0.0004	0	0.0003	0	0.0001	0.0004	0.0001	0.0004	0.0004	0	0	0	0	0.0004	0.0003	0.0004	0.0004	0.0004
556	0.8457	0.806	0.8471	0.8399	0.8403	0.6425	0.6165	0.6372	0.6308	0.6165	0.318	0.3084	0.3234	0.3185	0.2896	0.0658	0.0667	0.0723	0.0718	0.0447	0.0031	0.0019	0.0034	0.0029	0.0035	0	0.0001	0	0.0001	0	0.0003	0.0004	0	0.0003	0	0.0001	0.0004	0.0001	0.0004	0.0004	0	0	0	0	0.0004	0.0003	0.0004	0.0004	0.0004
557	0.8467	0.8069	0.8482	0.841	0.8413	0.6444	0.6182	0.6392	0.6326	0.6183	0.3204	0.3107	0.3262	0.3212	0.2921	0.0668	0.0677	0.0736	0.0729	0.0456	0.0032	0.0019	0.0036	0.0029	0.0035	0	0.0001	0	0.0001	0	0.0003	0.0004	0	0.0003	0	0.0001	0.0004	0.0001	0.0004	0.0004	0	0	0	0	0.0004	0.0003	0.0004	0.0004	0.0004
558	0.8478	0.8081	0.8492	0.8421	0.8423	0.6462	0.6201	0.641	0.6344	0.6202	0.3232	0.3134	0.3287	0.3236	0.2948	0.0678	0.0686	0.0744	0.0738	0.0464	0.0033	0.002	0.0036	0.003	0.0036	0	0.0001	0	0.0001	0	0.0003	0.0004	0	0.0003	0	0.0001	0.0004	0.0001	0.0004	0.0004	0	0	0	0	0.0004	0.0003	0.0004	0.0004	0.0004
559	0.8487	0.8089	0.8502	0.8431	0.8434	0.6481	0.6216	0.6427	0.6362	0.6217	0.3258	0.3157	0.3311	0.3261	0.2971	0.0688	0.0695	0.0754	0.0748	0.0473	0.0034	0.0021	0.0037	0.0032	0.0037	0	0.0001	0	0.0001	0	0.0003	0.0004	0	0.0003	0	0.0001	0.0004	0.0001	0.0004	0.0004	0	0	0	0	0.0004	0.0003	0.0004	0.0004	0.0004
560	0.8498	0.8099	0.8513	0.8442	0.8444	0.6499	0.6233	0.6446	0.638	0.6235	0.3283	0.318	0.3336	0.3289	0.2995	0.0696	0.0706	0.0767	0.0757	0.0482	0.0036	0.0021	0.0039	0.0033	0.0039	0	0.0001	0	0.0001	0	0.0003	0.0004	0	0.0003	0	0.0001	0.0004	0.0001	0.0004	0.0004	0	0	0	0	0.0004	0.0003	0.0004	0.0004	0.0004
561	0.8507	0.811	0.8524	0.8451	0.8454	0.6515	0.6251	0.6464	0.6398	0.6253	0.3309	0.3204	0.3364	0.3312	0.3022	0.0707	0.0716	0.0773	0.0769	0.049	0.0036	0.0024	0.0041	0.0034	0.004	0	0.0001	0	0.0001	0	0.0003	0.0004	0	0.0003	0	0.0001	0.0004	0.0001	0.0004	0.0004	0	0	0	0	0.0004	0.0003	0.0004	0.0004	0.0004
562	0.8517	0.8119	0.8532	0.8462	0.8464	0.6534	0.6268	0.6482	0.6415	0.6269	0.3335	0.323	0.339	0.3337	0.3047	0.0716	0.0725	0.0787	0.0778	0.0502	0.0038	0.0024	0.0042	0.0035	0.0042	0	0.0001	0	0.0001	0	0.0003	0.0004	0	0.0003	0	0.0001	0.0004	0.0001	0.0004	0.0004	0	0	0	0	0.0004	0.0003	0.0004	0.0004	0.0004
563	0.8528	0.813	0.8544	0.8473	0.8475	0.6552	0.6287	0.65	0.6433	0.6288	0.3361	0.3257	0.3416	0.3365	0.3071	0.0727	0.0736	0.0795	0.079	0.051	0.004	0.0026	0.0044	0.0038	0.0045	0	0.0001	0	0.0001	0	0.0003	0.0004	0	0.0003	0	0.0001	0.0004	0.0001	0.0004	0.0004	0	0	0	0	0.0004	0.0003	0.0004	0.0004	0.0004
564	0.8538	0.8138	0.8554	0.8482	0.8484	0.657	0.6302	0.6517	0.645	0.6304	0.3388	0.3279	0.3442	0.3388	0.3095	0.0736	0.0745	0.0805	0.08	0.0519	0.0039	0.0025	0.0044	0.0038	0.0044	0	0.0001	0	0.0001	0	0.0003	0.0004	0	0.0003	0	0.0001	0.0004	0.0001	0.0004	0.0004	0	0	0	0	0.0004	0.0003	0.0004	0.0004	0.0004
565	0.8547	0.8149	0.8563	0.8492	0.8493	0.6588	0.6318	0.6534	0.6468	0.6322	0.3413	0.3303	0.3467	0.3413	0.3117	0.0747	0.0755	0.0815	0.0807	0.0529	0.0042	0.0028	0.0046	0.0039	0.0046	0	0.0001	0	0.0001	0	0.0003	0.0004	0	0.0003	0	0.0001	0.0004	0.0001	0.0004	0.0004	0	0	0	0	0.0004	0.0003	0.0004	0.0004	0.0004
566	0.8558	0.8159	0.8574	0.8503	0.8504	0.6606	0.6338	0.6554	0.6487	0.634	0.3439	0.3329	0.3495	0.344	0.3147	0.0758	0.0766	0.0828	0.082	0.0537	0.0044	0.0029	0.0048	0.0042	0.0048	0	0.0001	0	0.0001	0	0.0003	0.0004	0	0.0003	0	0.0001	0.0004	0.0001	0.0004	0.0004	0	0	0	0	0.0004	0.0003	0.0004	0.0004	0.0004
567	0.8568	0.8167	0.8583	0.8513	0.8514	0.6624	0.6355	0.657	0.6502	0.6356	0.3467	0.3354	0.3521	0.3466	0.3171	0.0771	0.0775	0.0837	0.083	0.0549	0.0044	0.003	0.0048	0.0042	0.005	0	0.0001	0	0.0001	0	0.0003	0.0004	0	0.0003	0	0.0001	0.0004	0.0001	0.0004	0.0004	0	0	0	0	0.0004	0.0003	0.0004	0.0004	0.0004
568	0.8578	0.8178	0.8596	0.8523	0.8524	0.6641	0.6371	0.6588	0.6521	0.6373	0.3492	0.3377	0.3545	0.349	0.3194	0.0778	0.0785	0.085	0.084	0.0557	0.0045	0.0031	0.005	0.0043	0.005	0	0.0001	0	0.0001	0	0.0003	0.0004	0	0.0003	0	0.0001	0.0004	0.0001	0.0004	0.0004	0	0	0	0	0.0004	0.0003	0.0004	0.0004	0.0004
569	0.8589	0.8188	0.8607	0.8534	0.8535	0.6661	0.6388	0.6607	0.654	0.6391	0.3518	0.3403	0.3572	0.3517	0.3218	0.0789	0.0799	0.0862	0.0851	0.0568	0.0047	0.0031	0.0051	0.0044	0.0052	0	0.0001	0	0.0001	0	0.0003	0.0004	0	0.0003	0	0.0001	0.0004	0.0001	0.0004	0.0004	0	0	0	0	0.0004	0.0003	0.0004	0.0004	0.0004
570	0.8597	0.8198	0.8614	0.8543	0.8543	0.6677	0.6405	0.6624	0.6556	0.6408	0.3545	0.3425	0.3599	0.3542	0.3241	0.08	0.0808	0.0872	0.0864	0.0578	0.0048	0.0033	0.0054	0.0047	0.0054	0	0.0001	0	0.0001	0	0.0003	0.0004	0	0.0003	0	0.0001	0.0004	0.0001	0.0004	0.0004	0	0	0	0	0.0004	0.0003	0.0004	0.0004	0.0004
571	0.8607	0.8206	0.8623	0.8552	0.8553	0.6696	0.6422	0.6641	0.6573	0.6424	0.3569	0.3448	0.3624	0.3566	0.3268	0.0811	0.0819	0.0883	0.0874	0.0588	0.005	0.0033	0.0055	0.0047	0.0055	0	0.0001	0	0.0001	0	0.0003	0.0004	0	0.0003	0	0.0001	0.0004	0.0001	0.0004	0.0004	0	0	0	0	0.0004	0.0003	0.0004	0.0004	0.0004
572	0.8616	0.8215	0.8635	0.8563	0.8563	0.6712	0.6438	0.6658	0.6591	0.6441	0.3595	0.3474	0.3648	0.3591	0.3292	0.0822	0.0832	0.0895	0.0885	0.0597	0.0051	0.0035	0.0057	0.0049	0.0057	0	0.0001	0	0.0001	0	0.0003	0.0004	0	0.0003	0	0.0001	0.0004	0.0001	0.0004	0.0004	0	0	0	0	0.0004	0.0003	0.0004	0.0004	0.0004
573	0.8626	0.8225	0.8644	0.8574	0.8572	0.673	0.6455	0.6675	0.6608	0.6458	0.362	0.3498	0.3675	0.3616	0.3317	0.0831	0.0842	0.0904	0.0898	0.0608	0.0052	0.0034	0.0057	0.005	0.0058	0	0.0001	0	0.0001	0	0.0003	0.0004	0	0.0003	0	0.0001	0.0004	0.0001	0.0004	0.0004	0	0	0	0	0.0004	0.0003	0.0004	0.0004	0.0004
574	0.8638	0.8237	0.8657	0.8586	0.8584	0.6749	0.6477	0.6696	0.6627	0.6478	0.3649	0.3525	0.3703	0.3645	0.3344	0.0845	0.0853	0.0918	0.0909	0.0619	0.0053	0.0036	0.0059	0.0052	0.006	0	0.0001	0	0.0001	0	0.0003	0.0004	0	0.0003	0	0.0001	0.0004	0.0001	0.0004	0.0004	0	0	0	0	0.0004	0.0003	0.0004	0.0004	0.0004
575	0.8649	0.8248	0.8667	0.8595	0.8595	0.6767	0.6492	0.6713	0.6645	0.6495	0.3675	0.3552	0.3729	0.3673	0.3368	0.0857	0.0866	0.093	0.0921	0.063	0.0055	0.0038	0.006	0.0054	0.0062	0	0.0001	0	0.0001	0	0.0003	0.0004	0	0.0003	0	0.0001	0.0004	0.0001	0.0004	0.0004	0	0	0	0	0.0004	0.0003	0.0004	0.0004	0.0004
576	0.8656	0.8253	0.8674	0.8603	0.8602	0.6782	0.6506	0.6729	0.666	0.6509	0.37	0.3572	0.3751	0.3695	0.339	0.0869	0.0875	0.0942	0.0931	0.0639	0.0057	0.0038	0.0061	0.0053	0.0062	0	0.0001	0	0.0001	0	0.0003	0.0004	0	0.0003	0	0.0001	0.0004	0.0001	0.0004	0.0004	0	0	0	0	0.0004	0.0003	0.0004	0.0004	0.0004
577	0.8666	0.8263	0.8684	0.8613	0.8612	0.68	0.6523	0.6746	0.6677	0.6526	0.3724	0.3599	0.378	0.3718	0.3416	0.0878	0.089	0.0955	0.0946	0.0651	0.0058	0.004	0.0063	0.0056	0.0065	0	0.0001	0	0.0001	0	0.0003	0.0004	0	0.0003	0	0.0001	0.0004	0.0001	0.0004	0.0004	0	0	0	0	0.0004	0.0003	0.0004	0.0004	0.0004
578	0.8675	0.8273	0.8694	0.8623	0.8621	0.6818	0.6539	0.6764	0.6694	0.6542	0.375	0.3624	0.3804	0.3744	0.3439	0.0891	0.09	0.0966	0.0955	0.0662	0.006	0.0042	0.0067	0.0059	0.0068	0	0.0001	0	0.0001	0	0.0003	0.0004	0	0.0003	0	0.0001	0.0004	0.0001	0.0004	0.0004	0	0	0	0	0.0004	0.0003	0.0004	0.0004	0.0004
579	0.8686	0.8283	0.8705	0.8634	0.8631	0.6835	0.6557	0.6781	0.6711	0.656	0.3776	0.3648	0.3831	0.377	0.3465	0.0901	0.0913	0.0979	0.0969	0.0672	0.0062	0.0043	0.0068	0.006	0.0069	0	0.0001	0	0.0001	0	0.0003	0.0004	0	0.0003	0	0.0001	0.0004	0.0001	0.0004	0.0004	0	0	0	0	0.0004	0.0003	0.0004	0.0004	0.0004
580	0.8694	0.8291	0.8714	0.8643	0.8641	0.6852	0.6572	0.6797	0.6728	0.6576	0.3803	0.3671	0.3856	0.3795	0.3492	0.0915	0.0924	0.0988	0.098	0.0685	0.0064	0.0044	0.007	0.0062	0.0071	0	0.0001	0	0.0001	0	0.0003	0.0004	0	0.0003	0	0.0001	0.0004	0.0001	0.0004	0.0004	0	0	0	0	0.0004	0.0003	0.0004	0.0004	0.0004
581	0.8705	0.8302	0.8724	0.8654	0.8651	0.6871	0.659	0.6816	0.6747	0.6595	0.3833	0.3699	0.3886	0.3824	0.3519	0.0927	0.0938	0.1002	0.0995	0.0695	0.0065	0.0045	0.0072	0.0063	0.0073	0	0.0001	0	0.0001	0	0.0003	0.0004	0	0.0003	0	0.0001	0.0004	0.0001	0.0004	0.0004	0	0	0	0	0.0004	0.0003	0.0004	0.0004	0.0004
582	0.8714	0.831	0.8733	0.8663	0.866	0.6886	0.6606	0.6832	0.6762	0.6609	0.3855	0.3722	0.3908	0.3847	0.3542	0.0936	0.095	0.1013	0.1004	0.0707	0.0066	0.0046	0.0072	0.0065	0.0075	0	0.0001	0	0.0001	0	0.0003	0.0004	0	0.0003	0	0.0001	0.0004	0.0001	0.0004	0.0004	0	0	0	0	0.0004	0.0003	0.0004	0.0004	0.0004
583	0.8724	0.832	0.8744	0.8672	0.8669	0.6904	0.6623	0.6849	0.6779	0.6626	0.3881	0.3745	0.3934	0.387	0.3565	0.0951	0.0962	0.1027	0.1017	0.072	0.0068	0.0048	0.0076	0.0066	0.0077	0	0.0001	0	0.0001	0	0.0003	0.0004	0	0.0003	0	0.0001	0.0004	0.0001	0.0004	0.0004	0	0	0	0	0.0004	0.0003	0.0004	0.0004	0.0004
584	0.8733	0.833	0.8754	0.8684	0.8678	0.6921	0.6639	0.6867	0.6796	0.6643	0.3908	0.3772	0.3962	0.3897	0.3588	0.0963	0.0972	0.1046	0.1029	0.0728	0.0071	0.005	0.0077	0.0069	0.0078	0	0.0001	0	0.0001	0	0.0003	0.0004	0	0.0003	0	0.0001	0.0004	0.0001	0.0004	0.0004	0	0	0	0	0.0004	0.0003	0.0004	0.0004	0.0004
585	0.8745	0.8342	0.8766	0.8694	0.8691	0.6942	0.6657	0.6887	0.6816	0.6662	0.3938	0.3799	0.399	0.3925	0.3617	0.0978	0.0989	0.1054	0.1044	0.0742	0.0072	0.0051	0.0078	0.007	0.0081	0	0.0001	0	0.0001	0	0.0003	0.0004	0	0.0003	0	0.0001	0.0004	0.0001	0.0004	0.0004	0	0	0	0	0.0004	0.0003	0.0004	0.0004	0.0004
586	0.8755	0.8351	0.8777	0.8705	0.8701	0.6959	0.6676	0.6903	0.6833	0.668	0.3962	0.3824	0.4018	0.3952	0.3643	0.0991	0.1002	0.1072	0.1058	0.0758	0.0074	0.0052	0.0081	0.0072	0.0083	0	0.0001	0	0.0001	0	0.0003	0.0004	0	0.0003	0	0.0001	0.0004	0.0001	0.0004	0.0004	0	0	0	0	0.0004	0.0003	0.0004	0.0004	0.0004
587	0.8763	0.8358	0.8783	0.8713	0.8708	0.6972	0.6689	0.6918	0.6847	0.6694	0.3987	0.3846	0.404	0.3974	0.3667	0.1001	0.1012	0.1083	0.1069	0.0765	0.0075	0.0052	0.0083	0.0075	0.0085	0	0.0001	0	0.0001	0	0.0003	0.0004	0	0.0003	0	0.0001	0.0004	0.0001	0.0004	0.0004	0	0	0	0	0.0004	0.0003	0.0004	0.0004	0.0004
588	0.8773	0.8368	0.8793	0.8723	0.8718	0.699	0.6705	0.6935	0.6864	0.671	0.4013	0.387	0.4066	0.4	0.3692	0.1014	0.1024	0.1099	0.108	0.0779	0.0077	0.0054	0.0084	0.0076	0.0086	0	0.0001	0	0.0001	0	0.0003	0.0004	0	0.0003	0	0.0001	0.0004	0.0001	0.0004	0.0004	0	0	0	0	0.0004	0.0003	0.0004	0.0004	0.0004
589	0.8782	0.8375	0.8802	0.8732	0.8727	0.7007	0.672	0.6951	0.6882	0.6726	0.4038	0.3895	0.4093	0.4024	0.3716	0.1028	0.1042	0.1109	0.1095	0.0792	0.008	0.0057	0.0089	0.008	0.009	0	0.0001	0	0.0001	0	0.0003	0.0004	0	0.0003	0	0.0001	0.0004	0.0001	0.0004	0.0004	0	0	0	0	0.0004	0.0003	0.0004	0.0004	0.0004
590	0.8791	0.8386	0.8813	0.8741	0.8736	0.7023	0.6738	0.697	0.6897	0.6742	0.4065	0.392	0.4117	0.405	0.3741	0.1041	0.1052	0.1124	0.111	0.0804	0.0082	0.0059	0.0089	0.008	0.0091	0	0.0001	0	0.0001	0	0.0003	0.0004	0	0.0003	0	0.0001	0.0004	0.0001	0.0004	0.0004	0	0	0	0	0.0004	0.0003	0.0004	0.0004	0.0004
591	0.8801	0.8396	0.8824	0.8752	0.8747	0.7041	0.6756	0.6986	0.6915	0.6759	0.4088	0.3944	0.4143	0.4077	0.3769	0.1053	0.1064	0.1141	0.1122	0.0816	0.0084	0.0061	0.0092	0.0083	0.0095	0	0.0001	0	0.0001	0	0.0003	0.0004	0	0.0003	0	0.0001	0.0004	0.0001	0.0004	0.0004	0	0	0	0	0.0004	0.0003	0.0004	0.0004	0.0004
592	0.8813	0.8407	0.8836	0.8764	0.8758	0.7059	0.6772	0.7005	0.6933	0.6777	0.4118	0.3971	0.4174	0.4103	0.3793	0.1067	0.1083	0.1152	0.1139	0.0831	0.0087	0.0065	0.0095	0.0087	0.0098	0	0.0001	0	0.0001	0	0.0003	0.0004	0	0.0003	0	0.0001	0.0004	0.0001	0.0004	0.0004	0	0	0	0	0.0004	0.0003	0.0004	0.0004	0.0004
593	0.8822	0.8417	0.8846	0.8773	0.8767	0.7077	0.6787	0.7021	0.695	0.6794	0.4145	0.3997	0.4199	0.4129	0.382	0.1082	0.1094	0.1171	0.1153	0.0845	0.009	0.0067	0.0098	0.009	0.01	0	0.0001	0	0.0001	0	0.0003	0.0004	0	0.0003	0	0.0001	0.0004	0.0001	0.0004	0.0004	0	0	0	0	0.0004	0.0003	0.0004	0.0004	0.0004
594	0.8829	0.8424	0.8853	0.8781	0.8775	0.7091	0.6802	0.7037	0.6966	0.6808	0.4169	0.4019	0.4222	0.4153	0.3841	0.1092	0.1108	0.1183	0.1167	0.0855	0.0093	0.0068	0.01	0.0092	0.0103	0	0.0001	0	0.0001	0	0.0003	0.0004	0	0.0003	0	0.0001	0.0004	0.0001	0.0004	0.0004	0	0	0	0	0.0004	0.0003	0.0004	0.0004	0.0004
595	0.8839	0.8431	0.8861	0.879	0.8784	0.7109	0.6819	0.7053	0.6981	0.6824	0.4194	0.4046	0.4251	0.4176	0.3865	0.1107	0.112	0.1198	0.118	0.087	0.0094	0.0071	0.0102	0.0094	0.0105	0	0.0001	0	0.0001	0	0.0003	0.0004	0	0.0003	0	0.0001	0.0004	0.0001	0.0004	0.0004	0	0	0	0	0.0004	0.0003	0.0004	0.0004	0.0004
596	0.8848	0.8441	0.8872	0.8799	0.8793	0.7124	0.6834	0.7069	0.6996	0.6839	0.4218	0.4064	0.4275	0.4202	0.3889	0.1122	0.1135	0.1211	0.1193	0.0883	0.0098	0.0074	0.0105	0.0098	0.0109	0	0.0001	0	0.0001	0	0.0003	0.0004	0	0.0003	0	0.0001	0.0004	0.0001	0.0004	0.0004	0	0	0	0	0.0004	0.0003	0.0004	0.0004	0.0004
597	0.8858	0.8451	0.8883	0.881	0.8803	0.7142	0.685	0.7087	0.7014	0.6856	0.4246	0.4091	0.43	0.4229	0.3916	0.1138	0.115	0.1228	0.121	0.0899	0.0102	0.0078	0.0109	0.0101	0.0111	0	0.0001	0	0.0001	0	0.0003	0.0004	0	0.0003	0	0.0001	0.0004	0.0001	0.0004	0.0004	0	0	0	0	0.0004	0.0003	0.0004	0.0004	0.0004
598	0.8868	0.846	0.8891	0.8819	0.8812	0.7158	0.6866	0.7102	0.703	0.6873	0.427	0.4115	0.4326	0.4253	0.3938	0.1154	0.1165	0.1242	0.1225	0.0911	0.0104	0.0078	0.0111	0.0103	0.0114	0	0.0001	0	0.0001	0	0.0003	0.0004	0	0.0003	0	0.0001	0.0004	0.0001	0.0004	0.0004	0	0	0	0	0.0004	0.0003	0.0004	0.0004	0.0004
599	0.8876	0.8468	0.89	0.8827	0.882	0.7173	0.6881	0.7119	0.7046	0.6887	0.4293	0.4138	0.435	0.4276	0.3964	0.1164	0.1177	0.1253	0.1236	0.0923	0.0106	0.0082	0.0113	0.0105	0.0116	0	0.0001	0	0.0001	0	0.0003	0.0004	0	0.0003	0	0.0001	0.0004	0.0001	0.0004	0.0004	0	0	0	0	0.0004	0.0003	0.0004	0.0004	0.0004
600	0.8886	0.8477	0.8911	0.8838	0.883	0.719	0.6897	0.7135	0.7063	0.6903	0.4321	0.4162	0.4375	0.4302	0.3992	0.1179	0.1192	0.1271	0.1251	0.0937	0.011	0.0085	0.0116	0.0108	0.012	0	0.0001	0	0.0001	0	0.0003	0.0004	0	0.0003	0	0.0001	0.0004	0.0001	0.0004	0.0004	0	0	0	0	0.0004	0.0003	0.0004	0.0004	0.0004
601	0.8894	0.8485	0.8918	0.8846	0.8839	0.7206	0.6914	0.7152	0.7079	0.6919	0.4346	0.4189	0.4402	0.4326	0.4013	0.1193	0.1208	0.1286	0.1266	0.0951	0.0113	0.0089	0.012	0.0113	0.0124	0	0.0001	0	0.0001	0	0.0003	0.0004	0	0.0003	0	0.0001	0.0004	0.0001	0.0004	0.0004	0	0	0	0	0.0004	0.0003	0.0004	0.0004	0.0004
602	0.8904	0.8495	0.8929	0.8856	0.8848	0.7222	0.6929	0.7168	0.7095	0.6935	0.4371	0.4211	0.4427	0.4352	0.4038	0.1208	0.1218	0.1299	0.1279	0.0962	0.0116	0.0091	0.0123	0.0114	0.0125	0	0.0001	0	0.0001	0	0.0003	0.0004	0	0.0003	0	0.0001	0.0004	0.0001	0.0004	0.0004	0	0	0	0	0.0004	0.0003	0.0004	0.0004	0.0004
603	0.8913	0.8505	0.8938	0.8867	0.8858	0.7241	0.6947	0.7185	0.7111	0.695	0.4397	0.4233	0.4451	0.4376	0.4065	0.1221	0.1232	0.1313	0.1294	0.0979	0.0119	0.0094	0.0126	0.0119	0.0129	0	0.0001	0	0.0001	0	0.0003	0.0004	0	0.0003	0	0.0001	0.0004	0.0001	0.0004	0.0004	0	0	0	0	0.0004	0.0003	0.0004	0.0004	0.0004
604	0.8921	0.8513	0.8947	0.8876	0.8868	0.7257	0.6962	0.72	0.7127	0.6966	0.4421	0.4259	0.4476	0.4402	0.4088	0.1237	0.1248	0.1328	0.1307	0.099	0.0122	0.0098	0.0129	0.0122	0.0133	0	0.0001	0	0.0001	0	0.0003	0.0004	0	0.0003	0	0.0001	0.0004	0.0001	0.0004	0.0004	0	0	0	0	0.0004	0.0003	0.0004	0.0004	0.0004
605	0.893	0.8521	0.8956	0.8884	0.8876	0.7272	0.6978	0.7216	0.7142	0.6981	0.4447	0.4281	0.4501	0.4423	0.4112	0.1254	0.126	0.1345	0.1321	0.1004	0.0125	0.0101	0.0133	0.0125	0.0135	0	0.0001	0	0.0001	0	0.0003	0.0004	0	0.0003	0	0.0001	0.0004	0.0001	0.0004	0.0004	0	0	0	0	0.0004	0.0003	0.0004	0.0004	0.0004
606	0.894	0.853	0.8966	0.8894	0.8885	0.7287	0.6991	0.7233	0.7158	0.6997	0.447	0.4306	0.4526	0.4451	0.4138	0.1265	0.1276	0.1357	0.1336	0.1019	0.0128	0.0103	0.0135	0.0127	0.0138	0	0.0001	0	0.0001	0	0.0003	0.0004	0	0.0003	0	0.0001	0.0004	0.0001	0.0004	0.0004	0	0	0	0	0.0004	0.0003	0.0004	0.0004	0.0004
607	0.8948	0.8538	0.8975	0.8902	0.8893	0.7302	0.7006	0.7249	0.7174	0.7011	0.4496	0.4329	0.4551	0.4474	0.4158	0.128	0.1289	0.1373	0.1351	0.1033	0.0131	0.0106	0.0138	0.0131	0.0142	0	0.0001	0	0.0001	0	0.0003	0.0004	0	0.0003	0	0.0001	0.0004	0.0001	0.0004	0.0004	0	0	0	0	0.0004	0.0003	0.0004	0.0004	0.0004
608	0.8957	0.8548	0.8983	0.8911	0.8902	0.732	0.7021	0.7264	0.719	0.7027	0.4524	0.4352	0.4577	0.45	0.4184	0.1294	0.1307	0.139	0.1368	0.1048	0.0134	0.011	0.0142	0.0134	0.0145	0	0.0001	0	0.0001	0	0.0003	0.0004	0	0.0003	0	0.0001	0.0004	0.0001	0.0004	0.0004	0	0	0	0	0.0004	0.0003	0.0004	0.0004	0.0004
609	0.8966	0.8556	0.8995	0.892	0.8911	0.7334	0.7036	0.728	0.7205	0.7042	0.4544	0.4376	0.4602	0.4524	0.4208	0.1307	0.1319	0.1404	0.1383	0.1062	0.0137	0.0112	0.0144	0.0138	0.0148	0	0.0001	0	0.0001	0	0.0003	0.0004	0	0.0003	0	0.0001	0.0004	0.0001	0.0004	0.0004	0	0	0	0	0.0004	0.0003	0.0004	0.0004	0.0004
610	0.8974	0.8565	0.9003	0.8929	0.892	0.735	0.7052	0.7295	0.7221	0.7058	0.4572	0.4402	0.4625	0.4548	0.4234	0.1323	0.1335	0.1419	0.1398	0.1076	0.0141	0.0116	0.0148	0.0141	0.015	0	0.0001	0	0.0001	0	0.0003	0.0004	0	0.0003	0	0.0001	0.0004	0.0001	0.0004	0.0004	0	0	0	0	0.0004	0.0003	0.0004	0.0004	0.0004
611	0.8983	0.8573	0.9011	0.8938	0.8927	0.7365	0.7067	0.7311	0.7235	0.7073	0.4593	0.4424	0.4648	0.4571	0.4255	0.1337	0.1348	0.1434	0.1412	0.1087	0.0144	0.0119	0.0152	0.0146	0.0155	0	0.0001	0	0.0001	0	0.0003	0.0004	0	0.0003	0	0.0001	0.0004	0.0001	0.0004	0.0004	0	0	0	0	0.0004	0.0003	0.0004	0.0004	0.0004
612	0.8994	0.8585	0.9022	0.8949	0.8939	0.7383	0.7085	0.7329	0.7254	0.7091	0.4623	0.4452	0.4675	0.4597	0.4281	0.1353	0.1365	0.1454	0.1429	0.1103	0.0148	0.0123	0.0156	0.0149	0.016	0	0.0001	0	0.0001	0	0.0003	0.0004	0	0.0003	0	0.0001	0.0004	0.0001	0.0004	0.0004	0	0	0	0	0.0004	0.0003	0.0004	0.0004	0.0004
613	0.9001	0.859	0.9029	0.8955	0.8945	0.7396	0.7097	0.7342	0.7266	0.7103	0.4645	0.447	0.4698	0.462	0.4306	0.1366	0.1378	0.1469	0.1445	0.112	0.015	0.0126	0.0159	0.0154	0.0163	0	0.0001	0	0.0001	0	0.0003	0.0004	0	0.0003	0	0.0001	0.0004	0.0001	0.0004	0.0004	0	0	0	0	0.0004	0.0003	0.0004	0.0004	0.0004
614	0.9009	0.8598	0.9037	0.8965	0.8954	0.7412	0.7111	0.7357	0.7282	0.7118	0.4669	0.4492	0.4723	0.4643	0.4328	0.1382	0.1393	0.1483	0.1458	0.1131	0.0154	0.013	0.0161	0.0155	0.0165	0	0.0001	0	0.0001	0	0.0003	0.0004	0	0.0003	0	0.0001	0.0004	0.0001	0.0004	0.0004	0	0	0	0	0.0004	0.0003	0.0004	0.0004	0.0004
615	0.9018	0.8607	0.9048	0.8972	0.8962	0.7427	0.7125	0.7372	0.7297	0.7133	0.4692	0.4516	0.4747	0.4667	0.4352	0.1397	0.1411	0.1501	0.1477	0.115	0.0158	0.0134	0.0165	0.016	0.017	0	0.0001	0	0.0001	0	0.0003	0.0004	0	0.0003	0	0.0001	0.0004	0.0001	0.0004	0.0004	0	0	0	0	0.0004	0.0003	0.0004	0.0004	0.0004
616	0.9026	0.8615	0.9054	0.8981	0.897	0.7442	0.714	0.7387	0.7312	0.7148	0.4718	0.4539	0.4771	0.4692	0.4374	0.1414	0.1427	0.1516	0.1495	0.1164	0.0161	0.0137	0.0168	0.0163	0.0173	0	0.0001	0	0.0001	0	0.0003	0.0004	0	0.0003	0	0.0001	0.0004	0.0001	0.0004	0.0004	0	0	0	0	0.0004	0.0003	0.0004	0.0004	0.0004
617	0.9034	0.8623	0.9064	0.899	0.8979	0.7457	0.7156	0.7403	0.7328	0.7163	0.4741	0.4563	0.4796	0.4716	0.4398	0.1429	0.1444	0.1535	0.1508	0.1178	0.0165	0.014	0.0172	0.0167	0.0177	0	0.0001	0	0.0001	0	0.0003	0.0004	0	0.0003	0	0.0001	0.0004	0.0001	0.0004	0.0004	0	0	0	0	0.0004	0.0003	0.0004	0.0004	0.0004
618	0.9043	0.8632	0.9072	0.8998	0.8988	0.7474	0.717	0.7419	0.7343	0.7177	0.4764	0.4586	0.482	0.474	0.4422	0.1445	0.1458	0.1552	0.1527	0.1192	0.0169	0.0143	0.0176	0.0171	0.018	0	0.0001	0	0.0001	0	0.0003	0.0004	0	0.0003	0	0.0001	0.0004	0.0001	0.0004	0.0004	0	0	0	0	0.0004	0.0003	0.0004	0.0004	0.0004
619	0.9052	0.8641	0.908	0.9007	0.8996	0.7488	0.7185	0.7433	0.7358	0.7192	0.479	0.4608	0.4843	0.4763	0.4447	0.1461	0.1472	0.1569	0.1543	0.121	0.0173	0.0149	0.018	0.0174	0.0183	0	0.0001	0	0.0001	0	0.0003	0.0004	0	0.0003	0	0.0001	0.0004	0.0001	0.0004	0.0004	0	0	0	0	0.0004	0.0003	0.0004	0.0004	0.0004
620	0.906	0.8649	0.9089	0.9016	0.9004	0.7502	0.7199	0.7448	0.7372	0.7207	0.4815	0.4632	0.4867	0.4788	0.4467	0.1476	0.1491	0.1587	0.1559	0.1227	0.0179	0.0152	0.0185	0.0179	0.0188	0	0.0001	0	0.0001	0	0.0003	0.0004	0	0.0003	0	0.0001	0.0004	0.0001	0.0004	0.0004	0	0	0	0	0.0004	0.0003	0.0004	0.0004	0.0004
621	0.907	0.8658	0.91	0.9024	0.9013	0.7518	0.7214	0.7465	0.7387	0.7221	0.484	0.4655	0.4893	0.4812	0.449	0.1494	0.1508	0.1604	0.1577	0.124	0.0181	0.0156	0.0186	0.0183	0.0193	0	0.0001	0	0.0001	0	0.0003	0.0004	0	0.0003	0	0.0001	0.0004	0.0001	0.0004	0.0004	0	0	0	0	0.0004	0.0003	0.0004	0.0004	0.0004
622	0.9077	0.8665	0.9107	0.9032	0.902	0.7533	0.7227	0.7478	0.7401	0.7235	0.4863	0.4678	0.4918	0.4835	0.4515	0.1509	0.1523	0.1621	0.1591	0.1257	0.0185	0.016	0.0191	0.0186	0.0196	0	0.0001	0	0.0001	0	0.0003	0.0004	0	0.0003	0	0.0001	0.0004	0.0001	0.0004	0.0004	0	0	0	0	0.0004	0.0003	0.0004	0.0004	0.0004
623	0.9086	0.8674	0.9116	0.9041	0.9029	0.7549	0.7242	0.7493	0.7418	0.7249	0.4889	0.4701	0.4939	0.4859	0.4538	0.1527	0.154	0.1639	0.161	0.1273	0.0189	0.0166	0.0196	0.0191	0.0201	0	0.0001	0	0.0001	0	0.0003	0.0004	0	0.0003	0	0.0001	0.0004	0.0001	0.0004	0.0004	0	0	0	0	0.0004	0.0003	0.0004	0.0004	0.0004
624	0.9094	0.8681	0.9125	0.9049	0.9037	0.7563	0.7256	0.7508	0.7431	0.7264	0.4911	0.4724	0.4965	0.4881	0.4559	0.1545	0.1558	0.166	0.1627	0.1289	0.0193	0.017	0.0199	0.0195	0.0205	0	0.0001	0	0.0001	0	0.0003	0.0004	0	0.0003	0	0.0001	0.0004	0.0001	0.0004	0.0004	0	0	0	0	0.0004	0.0003	0.0004	0.0004	0.0004
625	0.9102	0.869	0.9131	0.9058	0.9045	0.7577	0.7269	0.7523	0.7446	0.7278	0.4934	0.4745	0.4987	0.4904	0.4582	0.1561	0.1577	0.1677	0.1646	0.1303	0.0197	0.0172	0.0202	0.0199	0.0209	0	0.0001	0	0.0001	0	0.0003	0.0004	0	0.0003	0	0.0001	0.0004	0.0001	0.0004	0.0004	0	0	0	0	0.0004	0.0003	0.0004	0.0004	0.0004
626	0.911	0.8697	0.914	0.9065	0.9053	0.7593	0.7285	0.7538	0.746	0.7292	0.4958	0.4769	0.5011	0.4927	0.4606	0.1579	0.1593	0.1695	0.1666	0.1322	0.0202	0.0176	0.0208	0.0203	0.0212	0	0.0001	0	0.0001	0	0.0003	0.0004	0	0.0003	0	0.0001	0.0004	0.0001	0.0004	0.0004	0	0	0	0	0.0004	0.0003	0.0004	0.0004	0.0004
627	0.9119	0.8706	0.9147	0.9074	0.9061	0.7608	0.7299	0.7552	0.7475	0.7306	0.4982	0.4791	0.5036	0.495	0.4629	0.1596	0.1609	0.171	0.1682	0.1337	0.0205	0.0181	0.0212	0.0208	0.0217	0	0.0001	0	0.0001	0	0.0003	0.0004	0	0.0003	0	0.0001	0.0004	0.0001	0.0004	0.0004	0	0	0	0	0.0004	0.0003	0.0004	0.0004	0.0004
628	0.9127	0.8712	0.9156	0.9082	0.9068	0.7621	0.7311	0.7566	0.749	0.7319	0.5006	0.4812	0.5059	0.4976	0.4651	0.1613	0.1626	0.1731	0.1698	0.1354	0.0209	0.0185	0.0214	0.0211	0.0221	0	0.0001	0	0.0001	0	0.0003	0.0004	0	0.0003	0	0.0001	0.0004	0.0001	0.0004	0.0004	0	0	0	0	0.0004	0.0003	0.0004	0.0004	0.0004
629	0.9136	0.8721	0.9165	0.9091	0.9078	0.7636	0.7327	0.7583	0.7504	0.7335	0.503	0.4835	0.5082	0.4997	0.4673	0.1633	0.1646	0.1747	0.1718	0.1374	0.0214	0.019	0.0219	0.0217	0.0226	0	0.0001	0	0.0001	0	0.0003	0.0004	0	0.0003	0	0.0001	0.0004	0.0001	0.0004	0.0004	0	0	0	0	0.0004	0.0003	0.0004	0.0004	0.0004
630	0.9144	0.8729	0.9175	0.91	0.9086	0.7652	0.7341	0.7597	0.7519	0.7349	0.5053	0.4858	0.5106	0.5022	0.4699	0.165	0.1667	0.1771	0.1738	0.1392	0.0218	0.0195	0.0223	0.0222	0.023	0	0.0001	0	0.0001	0	0.0003	0.0004	0	0.0003	0	0.0001	0.0004	0.0001	0.0004	0.0004	0	0	0	0	0.0004	0.0003	0.0004	0.0004	0.0004
631	0.915	0.8736	0.9181	0.9107	0.9094	0.7664	0.7353	0.761	0.7533	0.7362	0.5075	0.4878	0.5128	0.5043	0.4718	0.1666	0.1679	0.1787	0.1752	0.1407	0.0221	0.02	0.0227	0.0226	0.0234	0	0.0001	0	0.0001	0	0.0003	0.0004	0	0.0003	0	0.0001	0.0004	0.0001	0.0004	0.0004	0	0	0	0	0.0004	0.0003	0.0004	0.0004	0.0004
632	0.9158	0.8743	0.9189	0.9115	0.9101	0.7679	0.7367	0.7625	0.7549	0.7376	0.5099	0.4902	0.5153	0.5067	0.474	0.1686	0.1699	0.1805	0.1775	0.1425	0.0228	0.0203	0.0233	0.0231	0.0239	0	0.0001	0	0.0001	0	0.0003	0.0004	0	0.0003	0	0.0001	0.0004	0.0001	0.0004	0.0004	0	0	0	0	0.0004	0.0003	0.0004	0.0004	0.0004
633	0.9167	0.8751	0.9197	0.9124	0.9109	0.7694	0.7382	0.7639	0.7562	0.739	0.5123	0.4923	0.5176	0.5089	0.4763	0.1706	0.1715	0.1826	0.1791	0.1441	0.0231	0.0209	0.0238	0.0236	0.0243	0	0.0001	0	0.0001	0	0.0003	0.0004	0	0.0003	0	0.0001	0.0004	0.0001	0.0004	0.0004	0	0	0	0	0.0004	0.0003	0.0004	0.0004	0.0004
634	0.9175	0.8758	0.9206	0.9132	0.9117	0.7708	0.7395	0.7653	0.7575	0.7404	0.5146	0.4947	0.5199	0.5111	0.4787	0.1723	0.1735	0.1843	0.1808	0.146	0.0236	0.0212	0.024	0.0241	0.0249	0	0.0001	0	0.0001	0	0.0003	0.0004	0	0.0003	0	0.0001	0.0004	0.0001	0.0004	0.0004	0	0	0	0	0.0004	0.0003	0.0004	0.0004	0.0004
635	0.9183	0.8766	0.9213	0.9139	0.9124	0.7723	0.7408	0.7668	0.759	0.7417	0.517	0.4966	0.5222	0.5133	0.4807	0.1743	0.1753	0.1862	0.1828	0.1478	0.0241	0.0218	0.0247	0.0246	0.0254	0	0.0001	0	0.0001	0	0.0003	0.0004	0	0.0003	0	0.0001	0.0004	0.0001	0.0004	0.0004	0	0	0	0	0.0004	0.0003	0.0004	0.0004	0.0004
636	0.9191	0.8773	0.9221	0.9148	0.9132	0.7736	0.7421	0.7682	0.7603	0.7431	0.519	0.4989	0.5247	0.5158	0.483	0.1761	0.1771	0.1885	0.1849	0.1493	0.0246	0.0222	0.025	0.0249	0.0258	0	0.0001	0	0.0001	0	0.0003	0.0004	0	0.0003	0	0.0001	0.0004	0.0001	0.0004	0.0004	0	0	0	0	0.0004	0.0003	0.0004	0.0004	0.0004
637	0.9199	0.878	0.923	0.9156	0.914	0.775	0.7435	0.7696	0.7617	0.7445	0.5216	0.501	0.5267	0.518	0.4854	0.1776	0.1788	0.1902	0.1864	0.1514	0.025	0.0227	0.0256	0.0256	0.0263	0	0.0001	0	0.0001	0	0.0003	0.0004	0	0.0003	0	0.0001	0.0004	0.0001	0.0004	0.0004	0	0	0	0	0.0004	0.0003	0.0004	0.0004	0.0004
638	0.9206	0.8789	0.9236	0.9163	0.9148	0.7763	0.7449	0.771	0.7631	0.7458	0.5237	0.5036	0.5291	0.5202	0.4874	0.1795	0.1807	0.1919	0.1884	0.153	0.0255	0.0232	0.0259	0.026	0.0267	0	0.0001	0	0.0001	0	0.0003	0.0004	0	0.0003	0	0.0001	0.0004	0.0001	0.0004	0.0004	0	0	0	0	0.0004	0.0003	0.0004	0.0004	0.0004
639	0.9214	0.8796	0.9245	0.9172	0.9155	0.7778	0.7463	0.7725	0.7645	0.7472	0.526	0.5055	0.5315	0.5225	0.4896	0.1815	0.1825	0.1945	0.1903	0.1551	0.0261	0.0236	0.0265	0.0265	0.0274	0	0.0001	0	0.0001	0	0.0003	0.0004	0	0.0003	0	0.0001	0.0004	0.0001	0.0004	0.0004	0	0	0	0	0.0004	0.0003	0.0004	0.0004	0.0004
640	0.9221	0.8803	0.9253	0.9179	0.9163	0.7791	0.7476	0.7737	0.7658	0.7485	0.5283	0.5076	0.5335	0.5246	0.4918	0.1835	0.1845	0.196	0.1923	0.1568	0.0266	0.024	0.027	0.0271	0.0278	0	0.0001	0	0.0001	0	0.0003	0.0004	0	0.0003	0	0.0001	0.0004	0.0001	0.0004	0.0004	0	0	0	0	0.0004	0.0003	0.0004	0.0004	0.0004
641	0.923	0.8811	0.9261	0.9187	0.9171	0.7805	0.7488	0.7751	0.7674	0.7498	0.5306	0.5097	0.5358	0.5269	0.4942	0.1853	0.1865	0.1982	0.1943	0.1586	0.027	0.0245	0.0274	0.0274	0.0282	0	0.0001	0	0.0001	0	0.0003	0.0004	0	0.0003	0	0.0001	0.0004	0.0001	0.0004	0.0004	0	0	0	0	0.0004	0.0003	0.0004	0.0004	0.0004
642	0.9237	0.8818	0.9268	0.9195	0.9178	0.7819	0.7501	0.7765	0.7688	0.7511	0.5331	0.5119	0.5382	0.5292	0.4964	0.1872	0.1885	0.2002	0.1962	0.1607	0.0275	0.0251	0.0279	0.0281	0.0289	0	0.0001	0	0.0001	0	0.0003	0.0004	0	0.0003	0	0.0001	0.0004	0.0001	0.0004	0.0004	0	0	0	0	0.0004	0.0003	0.0004	0.0004	0.0004
643	0.9245	0.8826	0.9276	0.9204	0.9185	0.7833	0.7516	0.778	0.77	0.7524	0.5353	0.5142	0.5404	0.5314	0.4984	0.1891	0.1903	0.2023	0.1983	0.1624	0.0281	0.0257	0.0284	0.0286	0.0293	0	0.0001	0	0.0001	0	0.0003	0.0004	0	0.0003	0	0.0001	0.0004	0.0001	0.0004	0.0004	0	0	0	0	0.0004	0.0003	0.0004	0.0004	0.0004
644	0.9252	0.8833	0.9284	0.921	0.9194	0.7847	0.7528	0.7793	0.7714	0.7538	0.5373	0.5163	0.5428	0.5335	0.5008	0.1909	0.1925	0.2044	0.2002	0.1641	0.0286	0.0261	0.0288	0.0291	0.0297	0	0.0001	0	0.0001	0	0.0003	0.0004	0	0.0003	0	0.0001	0.0004	0.0001	0.0004	0.0004	0	0	0	0	0.0004	0.0003	0.0004	0.0004	0.0004
645	0.926	0.884	0.9292	0.9218	0.92	0.786	0.754	0.7806	0.7727	0.7551	0.5396	0.5185	0.5449	0.5357	0.503	0.193	0.1942	0.2062	0.2023	0.1658	0.0292	0.0266	0.0293	0.0296	0.0304	0	0.0001	0	0.0001	0	0.0003	0.0004	0	0.0003	0	0.0001	0.0004	0.0001	0.0004	0.0004	0	0	0	0	0.0004	0.0003	0.0004	0.0004	0.0004
646	0.9267	0.8847	0.9299	0.9225	0.9208	0.7873	0.7554	0.7819	0.774	0.7564	0.5418	0.5206	0.5469	0.538	0.505	0.1946	0.1959	0.208	0.204	0.1675	0.0296	0.0271	0.0298	0.03	0.0309	0	0.0001	0	0.0001	0	0.0003	0.0004	0	0.0003	0	0.0001	0.0004	0.0001	0.0004	0.0004	0	0	0	0	0.0004	0.0003	0.0004	0.0004	0.0004
647	0.9276	0.8854	0.9308	0.9233	0.9215	0.7887	0.7566	0.7834	0.7755	0.7576	0.5439	0.5226	0.5489	0.54	0.507	0.1966	0.198	0.2101	0.206	0.1696	0.0301	0.0276	0.0303	0.0306	0.0314	0	0.0001	0	0.0001	0	0.0003	0.0004	0	0.0003	0	0.0001	0.0004	0.0001	0.0004	0.0004	0	0	0	0	0.0004	0.0003	0.0004	0.0004	0.0004
648	0.9283	0.8861	0.9314	0.9241	0.9223	0.7899	0.7577	0.7846	0.7767	0.7587	0.5463	0.5247	0.5512	0.5423	0.509	0.1988	0.1998	0.2122	0.2081	0.1714	0.0308	0.0281	0.0308	0.0311	0.0318	0	0.0001	0	0.0001	0	0.0003	0.0004	0	0.0003	0	0.0001	0.0004	0.0001	0.0004	0.0004	0	0	0	0	0.0004	0.0003	0.0004	0.0004	0.0004
649	0.929	0.8868	0.9321	0.9248	0.923	0.7912	0.7591	0.7859	0.7778	0.76	0.5482	0.5268	0.5536	0.5444	0.5112	0.2008	0.2015	0.2145	0.21	0.1733	0.0311	0.0286	0.0313	0.0316	0.0324	0	0.0001	0	0.0001	0	0.0003	0.0004	0	0.0003	0	0.0001	0.0004	0.0001	0.0004	0.0004	0	0	0	0	0.0004	0.0003	0.0004	0.0004	0.0004
650	0.93	0.8876	0.933	0.9257	0.9238	0.7927	0.7605	0.7873	0.7794	0.7615	0.5507	0.5289	0.5559	0.5468	0.5136	0.2027	0.2041	0.2167	0.2123	0.1755	0.0319	0.0293	0.0319	0.0323	0.0331	0	0.0001	0	0.0001	0	0.0003	0.0004	0	0.0003	0	0.0001	0.0004	0.0001	0.0004	0.0004	0	0	0	0	0.0004	0.0003	0.0004	0.0004	0.0004
651	0.9306	0.8883	0.9336	0.9263	0.9245	0.7938	0.7615	0.7886	0.7805	0.7627	0.5527	0.5309	0.558	0.5489	0.5158	0.2046	0.2061	0.2187	0.2144	0.1771	0.0322	0.0298	0.0324	0.0328	0.0336	0	0.0001	0	0.0001	0	0.0003	0.0004	0	0.0003	0	0.0001	0.0004	0.0001	0.0004	0.0004	0	0	0	0	0.0004	0.0003	0.0004	0.0004	0.0004
652	0.9313	0.889	0.9343	0.9271	0.9252	0.7951	0.7629	0.7899	0.7819	0.764	0.5546	0.5329	0.5601	0.5508	0.5178	0.2067	0.2079	0.2207	0.2168	0.1792	0.0329	0.0304	0.0328	0.0334	0.0342	0	0.0001	0	0.0001	0	0.0003	0.0004	0	0.0003	0	0.0001	0.0004	0.0001	0.0004	0.0004	0	0	0	0	0.0004	0.0003	0.0004	0.0004	0.0004
653	0.9321	0.8897	0.9353	0.9278	0.9259	0.7964	0.764	0.7913	0.7832	0.7652	0.5569	0.5351	0.5622	0.5528	0.5197	0.2087	0.2101	0.223	0.2185	0.1812	0.0335	0.0309	0.0335	0.0339	0.0347	0	0.0001	0	0.0001	0	0.0003	0.0004	0	0.0003	0	0.0001	0.0004	0.0001	0.0004	0.0004	0	0	0	0	0.0004	0.0003	0.0004	0.0004	0.0004
654	0.9328	0.8904	0.9359	0.9286	0.9267	0.7977	0.7653	0.7926	0.7846	0.7664	0.5592	0.5371	0.5644	0.555	0.5218	0.211	0.212	0.2253	0.2206	0.1832	0.0339	0.0315	0.034	0.0345	0.0351	0	0.0001	0	0.0001	0	0.0003	0.0004	0	0.0003	0	0.0001	0.0004	0.0001	0.0004	0.0004	0	0	0	0	0.0004	0.0003	0.0004	0.0004	0.0004
655	0.9336	0.8911	0.9366	0.9293	0.9273	0.799	0.7665	0.7939	0.7857	0.7677	0.5612	0.5392	0.5665	0.5572	0.524	0.2131	0.2143	0.2274	0.2228	0.1853	0.0347	0.0322	0.0346	0.0352	0.0358	0	0.0001	0	0.0001	0	0.0003	0.0004	0	0.0003	0	0.0001	0.0004	0.0001	0.0004	0.0004	0	0	0	0	0.0004	0.0003	0.0004	0.0004	0.0004
656	0.9343	0.8918	0.9375	0.9301	0.9282	0.8003	0.7678	0.7952	0.7871	0.769	0.5635	0.5409	0.5686	0.5594	0.5262	0.2151	0.2168	0.2301	0.2247	0.1877	0.0351	0.0326	0.0353	0.0357	0.0364	0	0.0001	0	0.0001	0	0.0003	0.0004	0	0.0003	0	0.0001	0.0004	0.0001	0.0004	0.0004	0	0	0	0	0.0004	0.0003	0.0004	0.0004	0.0004
657	0.935	0.8926	0.9381	0.9308	0.9289	0.8015	0.7691	0.7964	0.7883	0.7702	0.5657	0.5431	0.5709	0.5615	0.528	0.2173	0.2188	0.2322	0.2272	0.1895	0.0358	0.0332	0.0357	0.0363	0.0371	0.0001	0.0002	0	0.0001	0	0.0003	0.0004	0	0.0003	0	0.0001	0.0004	0.0001	0.0004	0.0004	0	0	0	0	0.0004	0.0003	0.0004	0.0004	0.0004
658	0.9357	0.8932	0.939	0.9315	0.9296	0.8029	0.7704	0.7977	0.7895	0.7715	0.5679	0.5452	0.573	0.5636	0.53	0.2193	0.2207	0.2345	0.2295	0.1916	0.0363	0.0337	0.0363	0.0371	0.0377	0.0001	0.0001	0	0.0001	0	0.0003	0.0004	0	0.0003	0	0.0001	0.0004	0.0001	0.0004	0.0004	0	0	0	0	0.0004	0.0003	0.0004	0.0004	0.0004
659	0.9366	0.8939	0.9396	0.9323	0.9303	0.804	0.7714	0.7989	0.7908	0.7726	0.5697	0.5471	0.575	0.5656	0.5322	0.2216	0.2231	0.2368	0.2316	0.1935	0.037	0.0343	0.0368	0.0377	0.0384	0.0001	0.0002	0	0.0001	0	0.0003	0.0004	0	0.0003	0	0.0001	0.0004	0.0001	0.0004	0.0004	0	0	0	0	0.0004	0.0003	0.0004	0.0004	0.0004
660	0.937	0.8946	0.9403	0.9329	0.931	0.8053	0.7727	0.8003	0.792	0.7738	0.5719	0.549	0.5772	0.5676	0.5343	0.2238	0.2254	0.239	0.2339	0.1958	0.0377	0.0351	0.0375	0.0384	0.0388	0.0001	0.0002	0	0.0001	0	0.0003	0.0004	0	0.0003	0	0.0001	0.0004	0.0001	0.0004	0.0004	0	0	0	0	0.0004	0.0003	0.0004	0.0004	0.0004
661	0.9378	0.8953	0.9411	0.9338	0.9317	0.8065	0.7739	0.8016	0.7934	0.7751	0.574	0.5511	0.5793	0.5696	0.5364	0.2262	0.2275	0.2415	0.2362	0.1979	0.0381	0.0355	0.0381	0.0389	0.0396	0.0002	0.0002	0	0.0001	0	0.0003	0.0004	0	0.0003	0	0.0001	0.0004	0.0001	0.0004	0.0004	0	0	0	0	0.0004	0.0003	0.0004	0.0004	0.0004
662	0.9387	0.896	0.9419	0.9346	0.9324	0.8079	0.7752	0.8028	0.7946	0.7763	0.5762	0.5535	0.5814	0.5718	0.5382	0.2282	0.2299	0.2437	0.2386	0.2001	0.0388	0.0364	0.0387	0.0396	0.04	0.0002	0.0003	0	0.0002	0	0.0003	0.0004	0	0.0003	0	0.0001	0.0004	0.0001	0.0004	0.0004	0	0	0	0	0.0004	0.0003	0.0004	0.0004	0.0004
663	0.9393	0.8967	0.9426	0.9353	0.9332	0.8091	0.7764	0.8041	0.7959	0.7776	0.5785	0.5553	0.5834	0.5739	0.5406	0.2306	0.2326	0.2463	0.2408	0.2025	0.0394	0.037	0.0393	0.0402	0.0407	0.0002	0.0003	0	0.0001	0	0.0003	0.0004	0	0.0003	0	0.0001	0.0004	0.0001	0.0004	0.0004	0	0	0	0	0.0004	0.0003	0.0004	0.0004	0.0004
664	0.9401	0.8974	0.9432	0.936	0.9338	0.8103	0.7775	0.8053	0.797	0.7787	0.5803	0.557	0.5854	0.5759	0.5424	0.233	0.2345	0.2487	0.2429	0.2046	0.04	0.0374	0.0399	0.0409	0.0415	0.0003	0.0003	0	0.0002	0	0.0003	0.0004	0	0.0003	0	0.0001	0.0004	0.0001	0.0004	0.0004	0	0	0	0	0.0004	0.0003	0.0004	0.0004	0.0004
665	0.9407	0.898	0.944	0.9366	0.9345	0.8115	0.7788	0.8065	0.7983	0.78	0.5824	0.559	0.5876	0.5781	0.5445	0.2349	0.2369	0.2512	0.2458	0.2068	0.0407	0.0383	0.0408	0.0414	0.042	0.0004	0.0004	0	0.0002	0	0.0003	0.0004	0	0.0003	0	0.0001	0.0004	0.0001	0.0004	0.0004	0	0	0	0	0.0004	0.0003	0.0004	0.0004	0.0004
666	0.9414	0.8988	0.9447	0.9375	0.9353	0.8128	0.7801	0.8079	0.7996	0.7812	0.5845	0.5613	0.5897	0.5801	0.5467	0.2376	0.239	0.2537	0.2481	0.209	0.0415	0.0388	0.0413	0.0422	0.0428	0.0004	0.0006	0	0.0003	0	0.0003	0.0004	0	0.0003	0	0.0001	0.0004	0.0001	0.0004	0.0004	0	0	0	0	0.0004	0.0003	0.0004	0.0004	0.0004
667	0.9422	0.8995	0.9456	0.9381	0.9361	0.8141	0.7811	0.8091	0.8008	0.7824	0.5866	0.563	0.5918	0.582	0.5486	0.2401	0.2415	0.2561	0.2506	0.2112	0.0419	0.0394	0.0419	0.0428	0.0434	0.0005	0.0005	0	0.0003	0	0.0003	0.0004	0	0.0003	0	0.0001	0.0004	0.0001	0.0004	0.0004	0	0	0	0	0.0004	0.0003	0.0004	0.0004	0.0004
668	0.943	0.9001	0.9462	0.9389	0.9367	0.8152	0.7824	0.8104	0.802	0.7835	0.5887	0.5651	0.594	0.5841	0.5505	0.2424	0.2435	0.2584	0.253	0.2133	0.0427	0.04	0.0425	0.0436	0.0441	0.0005	0.0005	0	0.0003	0	0.0003	0.0004	0	0.0003	0	0.0001	0.0004	0.0001	0.0004	0.0004	0	0	0	0	0.0004	0.0003	0.0004	0.0004	0.0004
669	0.9437	0.9009	0.9469	0.9397	0.9374	0.8166	0.7836	0.8116	0.8033	0.7848	0.5908	0.5674	0.5961	0.5862	0.5527	0.2448	0.2461	0.2613	0.2555	0.2159	0.0434	0.041	0.0431	0.0442	0.0447	0.0005	0.0006	0	0.0003	0	0.0003	0.0004	0	0.0003	0	0.0001	0.0004	0.0001	0.0004	0.0004	0	0	0	0	0.0004	0.0003	0.0004	0.0004	0.0004
670	0.9443	0.9016	0.9476	0.9404	0.9382	0.8177	0.7847	0.8129	0.8046	0.786	0.593	0.569	0.5979	0.5882	0.5544	0.247	0.2488	0.2638	0.2578	0.2181	0.0441	0.0416	0.0438	0.0449	0.0454	0.0007	0.0007	0	0.0004	0	0.0003	0.0004	0	0.0003	0	0.0001	0.0004	0.0001	0.0004	0.0004	0	0	0	0	0.0004	0.0003	0.0004	0.0004	0.0004
671	0.945	0.9023	0.9485	0.9412	0.9389	0.8191	0.786	0.8142	0.8058	0.7872	0.5948	0.5711	0.6	0.5903	0.5566	0.2497	0.2511	0.2663	0.2602	0.2206	0.0448	0.0422	0.0446	0.0457	0.0462	0.0007	0.0007	0	0.0004	0	0.0003	0.0004	0	0.0003	0	0.0001	0.0004	0.0001	0.0004	0.0004	0	0	0	0	0.0004	0.0003	0.0004	0.0004	0.0004
672	0.946	0.9031	0.9494	0.942	0.9398	0.8204	0.7873	0.8155	0.8071	0.7886	0.5972	0.5733	0.6023	0.5924	0.5587	0.2525	0.2538	0.2693	0.263	0.2233	0.0455	0.043	0.0453	0.0464	0.0469	0.0008	0.0008	0	0.0005	0	0.0003	0.0004	0	0.0003	0	0.0001	0.0004	0.0001	0.0004	0.0004	0	0	0	0	0.0004	0.0003	0.0004	0.0004	0.0004
673	0.9466	0.9037	0.95	0.9426	0.9404	0.8215	0.7883	0.8168	0.8083	0.7896	0.5989	0.5749	0.6041	0.5943	0.5605	0.2546	0.256	0.2715	0.2654	0.2253	0.0461	0.0437	0.046	0.0469	0.0474	0.0007	0.0007	0	0.0004	0	0.0003	0.0004	0	0.0003	0	0.0001	0.0004	0.0001	0.0004	0.0004	0	0	0	0	0.0004	0.0003	0.0004	0.0004	0.0004
674	0.9473	0.9044	0.9506	0.9433	0.9411	0.8227	0.7897	0.8179	0.8095	0.7909	0.601	0.5769	0.6063	0.5965	0.5626	0.257	0.2584	0.2739	0.268	0.2278	0.0468	0.0443	0.0468	0.0477	0.0483	0.0009	0.0009	0	0.0005	0	0.0003	0.0004	0	0.0003	0	0.0001	0.0004	0.0001	0.0004	0.0004	0	0	0	0	0.0004	0.0003	0.0004	0.0004	0.0004
675	0.948	0.9051	0.9514	0.9441	0.9418	0.824	0.7909	0.8191	0.8106	0.7921	0.6031	0.5789	0.6083	0.5984	0.5647	0.2595	0.2607	0.2767	0.2706	0.2303	0.0475	0.045	0.0474	0.0484	0.0489	0.0009	0.0009	0	0.0006	0	0.0003	0.0004	0	0.0003	0	0.0001	0.0004	0.0001	0.0004	0.0004	0	0	0	0	0.0004	0.0003	0.0004	0.0004	0.0004
676	0.9486	0.9058	0.9521	0.9448	0.9425	0.8251	0.7919	0.8204	0.8119	0.7932	0.6051	0.5808	0.6104	0.6002	0.5666	0.2621	0.2635	0.279	0.273	0.2324	0.0483	0.0457	0.0482	0.0494	0.0495	0.0011	0.001	0	0.0007	0	0.0003	0.0004	0	0.0003	0	0.0001	0.0004	0.0001	0.0004	0.0004	0	0	0	0	0.0004	0.0003	0.0004	0.0004	0.0004
677	0.9495	0.9065	0.9529	0.9456	0.9433	0.8264	0.7932	0.8217	0.8133	0.7946	0.6072	0.5829	0.6124	0.6025	0.5686	0.2645	0.2658	0.2818	0.2757	0.235	0.0489	0.0464	0.0488	0.0501	0.0506	0.0011	0.0011	0	0.0006	0	0.0003	0.0004	0	0.0003	0	0.0001	0.0004	0.0001	0.0004	0.0004	0	0	0	0	0.0004	0.0003	0.0004	0.0004	0.0004
678	0.9502	0.9073	0.9537	0.9464	0.944	0.8277	0.7944	0.8229	0.8144	0.7956	0.6091	0.5848	0.6146	0.6044	0.5705	0.2671	0.2685	0.2844	0.2783	0.2376	0.0498	0.0472	0.0496	0.0507	0.0513	0.0011	0.0011	0	0.0008	0	0.0003	0.0004	0	0.0003	0	0.0001	0.0004	0.0001	0.0004	0.0004	0	0	0	0	0.0004	0.0003	0.0004	0.0004	0.0004
679	0.951	0.9079	0.9543	0.9471	0.9447	0.8289	0.7955	0.8242	0.8157	0.7969	0.6112	0.5867	0.6165	0.6064	0.5726	0.2697	0.2709	0.2873	0.2807	0.24	0.0506	0.0482	0.0504	0.0516	0.052	0.0014	0.0014	0	0.0009	0	0.0003	0.0004	0	0.0003	0	0.0001	0.0004	0.0001	0.0004	0.0004	0	0	0	0	0.0004	0.0003	0.0004	0.0004	0.0004
680	0.9516	0.9086	0.955	0.9477	0.9454	0.83	0.7966	0.8253	0.8168	0.798	0.6131	0.5887	0.6186	0.6085	0.5744	0.2722	0.2736	0.2898	0.2833	0.2423	0.0513	0.0486	0.0512	0.0522	0.0526	0.0013	0.0014	0	0.0008	0	0.0003	0.0004	0	0.0003	0	0.0001	0.0004	0.0001	0.0004	0.0004	0	0	0	0	0.0004	0.0003	0.0004	0.0004	0.0004
681	0.9523	0.9094	0.9558	0.9485	0.9462	0.8313	0.7979	0.8266	0.8181	0.7993	0.6152	0.5904	0.6205	0.6103	0.5764	0.2747	0.2758	0.2924	0.2859	0.2449	0.052	0.0494	0.0518	0.0531	0.0534	0.0014	0.0014	0	0.001	0	0.0003	0.0004	0	0.0003	0	0.0001	0.0004	0.0001	0.0004	0.0004	0	0	0	0	0.0004	0.0003	0.0004	0.0004	0.0004
682	0.953	0.91	0.9565	0.9492	0.9468	0.8324	0.799	0.8279	0.8193	0.8004	0.6171	0.5923	0.6227	0.6123	0.5784	0.2773	0.2786	0.2952	0.2884	0.2474	0.0528	0.0502	0.0526	0.0538	0.0541	0.0016	0.0016	0	0.001	0	0.0003	0.0004	0	0.0003	0	0.0001	0.0004	0.0001	0.0004	0.0004	0	0	0	0	0.0004	0.0003	0.0004	0.0004	0.0004
683	0.9537	0.9107	0.9572	0.95	0.9476	0.8337	0.8002	0.8291	0.8204	0.8017	0.6193	0.5943	0.6247	0.6144	0.5801	0.28	0.281	0.2977	0.2912	0.25	0.0536	0.051	0.0535	0.0548	0.0551	0.0017	0.0016	0	0.0011	0	0.0003	0.0004	0	0.0003	0	0.0001	0.0004	0.0001	0.0004	0.0004	0	0	0	0	0.0004	0.0003	0.0004	0.0004	0.0004
684	0.9545	0.9113	0.9579	0.9508	0.9483	0.8349	0.8013	0.8303	0.8216	0.8028	0.6212	0.5962	0.6268	0.6162	0.5822	0.2824	0.2835	0.3004	0.2936	0.2527	0.0543	0.0516	0.054	0.0554	0.0559	0.0017	0.0018	0	0.0011	0	0.0003	0.0004	0	0.0003	0	0.0001	0.0004	0.0001	0.0004	0.0004	0	0	0	0	0.0004	0.0003	0.0004	0.0004	0.0004
685	0.9554	0.9123	0.9589	0.9517	0.9492	0.8363	0.8027	0.8317	0.8232	0.8042	0.6234	0.5984	0.6289	0.6186	0.5845	0.2854	0.2865	0.3032	0.2967	0.2555	0.0553	0.0527	0.055	0.0566	0.057	0.0018	0.0018	0	0.0012	0	0.0003	0.0004	0	0.0003	0	0.0001	0.0004	0.0001	0.0004	0.0004	0	0	0	0	0.0004	0.0003	0.0004	0.0004	0.0004
686	0.9558	0.9128	0.9595	0.9522	0.9498	0.8374	0.8038	0.8327	0.8242	0.8052	0.6253	0.6	0.6307	0.6203	0.5862	0.2878	0.2888	0.3058	0.299	0.2577	0.056	0.0534	0.0556	0.0572	0.0576	0.0019	0.0019	0	0.0013	0	0.0003	0.0004	0	0.0003	0	0.0001	0.0004	0.0001	0.0004	0.0004	0	0	0	0	0.0004	0.0003	0.0004	0.0004	0.0004
687	0.9567	0.9135	0.9602	0.953	0.9505	0.8386	0.8049	0.834	0.8254	0.8064	0.6272	0.6019	0.6328	0.6223	0.5882	0.2906	0.2914	0.3085	0.3019	0.2603	0.0567	0.0541	0.0565	0.058	0.0584	0.002	0.002	0	0.0014	0	0.0003	0.0004	0	0.0003	0	0.0001	0.0004	0.0001	0.0004	0.0004	0	0	0	0	0.0004	0.0003	0.0004	0.0004	0.0004
688	0.9574	0.9143	0.961	0.9538	0.9512	0.8398	0.806	0.8353	0.8266	0.8076	0.6292	0.6038	0.6346	0.6242	0.5899	0.293	0.2941	0.3116	0.3043	0.263	0.0576	0.0551	0.0574	0.0589	0.0593	0.0022	0.0021	0	0.0015	0	0.0003	0.0004	0	0.0003	0	0.0001	0.0004	0.0001	0.0004	0.0004	0	0	0	0	0.0004	0.0003	0.0004	0.0004	0.0004
689	0.958	0.915	0.9617	0.9545	0.9519	0.8407	0.8071	0.8364	0.8276	0.8087	0.6312	0.6056	0.6366	0.6262	0.5919	0.2956	0.2967	0.3138	0.307	0.2653	0.0586	0.0558	0.0582	0.0598	0.0602	0.0023	0.0022	0	0.0016	0	0.0003	0.0004	0	0.0003	0	0.0001	0.0004	0.0001	0.0004	0.0004	0	0	0	0	0.0004	0.0003	0.0004	0.0004	0.0004
690	0.9588	0.9157	0.9624	0.9552	0.9526	0.842	0.8083	0.8376	0.8288	0.8099	0.6332	0.6075	0.6386	0.628	0.5938	0.2982	0.2994	0.3166	0.3101	0.2682	0.0594	0.0565	0.0591	0.0606	0.0611	0.0024	0.0024	0	0.0016	0	0.0003	0.0004	0	0.0003	0	0.0001	0.0004	0.0001	0.0004	0.0004	0	0	0	0	0.0004	0.0003	0.0004	0.0004	0.0004
691	0.9596	0.9164	0.9633	0.956	0.9534	0.8432	0.8094	0.8388	0.8302	0.8111	0.6351	0.6094	0.6407	0.6301	0.5957	0.3008	0.3017	0.3195	0.3124	0.2707	0.0602	0.0574	0.0599	0.0615	0.0618	0.0025	0.0024	0	0.0016	0	0.0003	0.0004	0	0.0003	0	0.0001	0.0004	0.0001	0.0004	0.0004	0	0	0	0	0.0004	0.0003	0.0004	0.0004	0.0004
692	0.9603	0.9172	0.9641	0.9566	0.9542	0.8445	0.8105	0.84	0.8313	0.8123	0.6371	0.6113	0.6424	0.632	0.5978	0.3037	0.3044	0.3221	0.3153	0.2732	0.0611	0.0582	0.0608	0.0623	0.0628	0.0027	0.0026	0	0.0018	0	0.0003	0.0004	0	0.0003	0	0.0001	0.0004	0.0001	0.0004	0.0004	0	0	0	0	0.0004	0.0003	0.0004	0.0004	0.0004
693	0.961	0.9178	0.9648	0.9575	0.9548	0.8456	0.8117	0.8411	0.8325	0.8134	0.6391	0.6131	0.6445	0.6339	0.5995	0.3062	0.3071	0.3248	0.3179	0.2759	0.062	0.0593	0.0616	0.0633	0.0637	0.0029	0.0028	0	0.002	0	0.0003	0.0004	0	0.0003	0	0.0001	0.0004	0.0001	0.0004	0.0004	0	0	0	0	0.0004	0.0003	0.0004	0.0004	0.0004
694	0.9617	0.9185	0.9654	0.9581	0.9554	0.8467	0.8128	0.8424	0.8337	0.8146	0.6409	0.6148	0.6463	0.6357	0.6016	0.3088	0.3096	0.3276	0.3206	0.2784	0.0629	0.0602	0.0624	0.0642	0.0646	0.0029	0.0027	0	0.002	0	0.0003	0.0004	0	0.0003	0	0.0001	0.0004	0.0001	0.0004	0.0004	0	0	0	0	0.0004	0.0003	0.0004	0.0004	0.0004
695	0.9624	0.9193	0.9661	0.9589	0.9562	0.8479	0.814	0.8436	0.8349	0.8157	0.6428	0.6168	0.6485	0.6377	0.6034	0.3117	0.3124	0.3304	0.3233	0.2811	0.0638	0.0612	0.0634	0.0652	0.0655	0.0032	0.0029	0	0.0022	0	0.0003	0.0004	0	0.0003	0	0.0001	0.0004	0.0001	0.0004	0.0004	0	0	0	0	0.0004	0.0003	0.0004	0.0004	0.0004
696	0.963	0.9198	0.9668	0.9595	0.9569	0.8491	0.8151	0.8447	0.8362	0.8169	0.6448	0.6186	0.6502	0.6395	0.6051	0.3142	0.3152	0.333	0.3257	0.2837	0.0647	0.0619	0.0645	0.0662	0.0664	0.0032	0.003	0	0.0023	0	0.0003	0.0004	0	0.0003	0	0.0001	0.0004	0.0001	0.0004	0.0004	0	0	0	0	0.0004	0.0003	0.0004	0.0004	0.0004
697	0.9638	0.9207	0.9678	0.9604	0.9576	0.8503	0.8161	0.8459	0.8373	0.818	0.6467	0.6206	0.6521	0.6416	0.6071	0.317	0.3177	0.3356	0.329	0.2864	0.0656	0.0628	0.0654	0.0673	0.0673	0.0034	0.0033	0	0.0025	0	0.0003	0.0004	0	0.0003	0	0.0001	0.0004	0.0001	0.0004	0.0004	0	0	0	0	0.0004	0.0003	0.0004	0.0004	0.0004
698	0.9645	0.9213	0.9685	0.9612	0.9583	0.8516	0.8175	0.8471	0.8383	0.8192	0.6487	0.6223	0.6541	0.6435	0.6091	0.3197	0.32	0.3388	0.3314	0.2888	0.0664	0.064	0.0662	0.0681	0.0686	0.0034	0.0033	0	0.0025	0	0.0003	0.0004	0	0.0003	0	0.0001	0.0004	0.0001	0.0004	0.0004	0	0	0	0	0.0004	0.0003	0.0004	0.0004	0.0004
699	0.9652	0.9221	0.9691	0.9619	0.9591	0.8526	0.8185	0.8482	0.8396	0.8204	0.6506	0.624	0.656	0.6453	0.6109	0.3221	0.3226	0.3414	0.334	0.2915	0.0674	0.0649	0.0671	0.069	0.0694	0.0037	0.0035	0	0.0027	0	0.0003	0.0004	0	0.0003	0	0.0001	0.0004	0.0001	0.0004	0.0004	0	0	0	0	0.0004	0.0003	0.0004	0.0004	0.0004
700	0.9659	0.9227	0.9699	0.9625	0.9596	0.8537	0.8196	0.8494	0.8407	0.8215	0.6524	0.626	0.6579	0.6472	0.6126	0.3247	0.3255	0.344	0.3367	0.294	0.0684	0.0657	0.068	0.07	0.0702	0.0038	0.0036	0	0.0028	0	0.0003	0.0004	0	0.0003	0	0.0001	0.0004	0.0001	0.0004	0.0004	0	0	0	0	0.0004	0.0003	0.0004	0.0004	0.0004
701	0.9666	0.9235	0.9705	0.9632	0.9604	0.8549	0.8206	0.8505	0.8419	0.8227	0.6541	0.6277	0.6597	0.6491	0.6145	0.3273	0.3279	0.3466	0.3393	0.2968	0.0693	0.0668	0.069	0.071	0.0714	0.0039	0.0037	0	0.0029	0	0.0003	0.0004	0	0.0003	0	0.0001	0.0004	0.0001	0.0004	0.0004	0	0	0	0	0.0004	0.0003	0.0004	0.0004	0.0004
702	0.9672	0.9241	0.9712	0.964	0.9611	0.8561	0.8217	0.8518	0.843	0.8238	0.6563	0.6295	0.6616	0.6509	0.6164	0.3301	0.331	0.3495	0.3419	0.2994	0.0702	0.0676	0.0699	0.0719	0.0723	0.0039	0.0039	0	0.0029	0	0.0003	0.0004	0	0.0003	0	0.0001	0.0004	0.0001	0.0004	0.0004	0	0	0	0	0.0004	0.0003	0.0004	0.0004	0.0004
703	0.9679	0.9248	0.9719	0.9646	0.9618	0.857	0.8228	0.8529	0.8441	0.8249	0.6579	0.6312	0.6636	0.6527	0.618	0.3328	0.3333	0.352	0.3449	0.3021	0.0713	0.0687	0.0712	0.0729	0.0734	0.0041	0.0039	0	0.0031	0	0.0003	0.0004	0	0.0003	0	0.0001	0.0004	0.0001	0.0004	0.0004	0	0	0	0	0.0004	0.0003	0.0004	0.0004	0.0004
704	0.9685	0.9256	0.9727	0.9654	0.9625	0.8582	0.8238	0.854	0.8453	0.8259	0.6597	0.6331	0.6654	0.6546	0.6201	0.3353	0.3358	0.3548	0.3475	0.3047	0.0722	0.0698	0.0721	0.0739	0.0744	0.0043	0.0042	0	0.0033	0	0.0003	0.0004	0	0.0003	0	0.0001	0.0004	0.0001	0.0004	0.0004	0	0	0	0	0.0004	0.0003	0.0004	0.0004	0.0004
705	0.9693	0.9261	0.9733	0.966	0.9631	0.8593	0.8249	0.8552	0.8463	0.827	0.6617	0.6348	0.6673	0.6564	0.6219	0.3382	0.3384	0.3576	0.35	0.307	0.0732	0.0706	0.0729	0.0748	0.0753	0.0044	0.0043	0.0001	0.0034	0	0.0003	0.0004	0	0.0003	0	0.0001	0.0004	0.0001	0.0004	0.0004	0	0	0	0	0.0004	0.0003	0.0004	0.0004	0.0004
706	0.97	0.9268	0.9742	0.9668	0.9638	0.8606	0.826	0.8563	0.8476	0.8281	0.6636	0.6365	0.669	0.6582	0.6238	0.3408	0.341	0.3603	0.353	0.3097	0.0743	0.0719	0.074	0.0763	0.0765	0.0045	0.0044	0	0.0035	0	0.0003	0.0004	0	0.0003	0	0.0001	0.0004	0.0001	0.0004	0.0004	0	0	0	0	0.0004	0.0003	0.0004	0.0004	0.0004
707	0.9707	0.9274	0.9749	0.9675	0.9644	0.8617	0.8271	0.8574	0.8486	0.8294	0.6654	0.6381	0.6711	0.6601	0.6254	0.3434	0.3434	0.363	0.3556	0.3123	0.0751	0.0729	0.0751	0.0771	0.0775	0.0046	0.0045	0.0001	0.0036	0	0.0003	0.0004	0	0.0003	0	0.0001	0.0004	0.0001	0.0004	0.0004	0	0	0	0	0.0004	0.0003	0.0004	0.0004	0.0004
708	0.9713	0.9281	0.9755	0.9681	0.9651	0.8627	0.8281	0.8585	0.8497	0.8303	0.667	0.6401	0.6726	0.6617	0.6272	0.3459	0.3459	0.3654	0.3579	0.3147	0.0762	0.0736	0.0759	0.078	0.0784	0.0047	0.0046	0	0.0036	0	0.0003	0.0004	0	0.0003	0	0.0001	0.0004	0.0001	0.0004	0.0004	0	0	0	0	0.0004	0.0003	0.0004	0.0004	0.0004
709	0.9721	0.9287	0.9762	0.9689	0.9658	0.8638	0.8292	0.8597	0.8508	0.8316	0.6691	0.6417	0.6747	0.6637	0.629	0.3487	0.3488	0.3682	0.3608	0.3175	0.0772	0.0746	0.077	0.079	0.0794	0.005	0.0049	0.0001	0.0038	0	0.0003	0.0004	0	0.0003	0	0.0001	0.0004	0.0001	0.0004	0.0004	0	0	0	0	0.0004	0.0003	0.0004	0.0004	0.0004
710	0.9727	0.9294	0.977	0.9695	0.9664	0.865	0.8302	0.8607	0.852	0.8326	0.6709	0.6434	0.6765	0.6655	0.6308	0.3512	0.3512	0.3709	0.363	0.32	0.0783	0.0758	0.0781	0.0802	0.0806	0.0051	0.0049	0.0001	0.004	0	0.0003	0.0004	0	0.0003	0	0.0001	0.0004	0.0001	0.0004	0.0004	0	0	0	0	0.0004	0.0003	0.0004	0.0004	0.0004
711	0.9733	0.9301	0.9776	0.9703	0.9671	0.866	0.8315	0.8618	0.853	0.834	0.6726	0.6454	0.6781	0.6672	0.6325	0.3538	0.3538	0.3735	0.3661	0.3228	0.0795	0.0768	0.0793	0.0813	0.0815	0.0052	0.0049	0	0.0041	0	0.0003	0.0004	0	0.0003	0	0.0001	0.0004	0.0001	0.0004	0.0004	0	0	0	0	0.0004	0.0003	0.0004	0.0004	0.0004
712	0.9741	0.9308	0.9782	0.9709	0.9678	0.8672	0.8323	0.8629	0.8541	0.8349	0.6744	0.647	0.6799	0.669	0.6344	0.3566	0.3564	0.3762	0.3684	0.3252	0.0803	0.078	0.0801	0.0823	0.0826	0.0054	0.0053	0.0002	0.0043	0	0.0003	0.0004	0	0.0003	0	0.0001	0.0004	0.0001	0.0004	0.0004	0	0	0	0	0.0004	0.0003	0.0004	0.0004	0.0004
713	0.9746	0.9313	0.979	0.9716	0.9684	0.8682	0.8334	0.864	0.8553	0.8359	0.6762	0.6486	0.6818	0.6706	0.6359	0.3591	0.3589	0.3791	0.3712	0.3276	0.0816	0.079	0.0815	0.0835	0.0838	0.0056	0.0054	0.0003	0.0044	0	0.0003	0.0004	0	0.0003	0	0.0001	0.0004	0.0001	0.0004	0.0004	0	0	0	0	0.0004	0.0003	0.0004	0.0004	0.0004
714	0.9753	0.932	0.9796	0.9722	0.969	0.8692	0.8346	0.865	0.8563	0.8368	0.6781	0.6505	0.6836	0.6725	0.6377	0.3618	0.3612	0.3815	0.3739	0.3302	0.0826	0.0801	0.0822	0.0847	0.0849	0.0057	0.0054	0.0003	0.0046	0	0.0003	0.0004	0	0.0003	0	0.0001	0.0004	0.0001	0.0004	0.0004	0	0	0	0	0.0004	0.0003	0.0004	0.0004	0.0004
715	0.9759	0.9326	0.9802	0.9728	0.9696	0.8703	0.8354	0.8661	0.8574	0.8379	0.6798	0.6522	0.6852	0.6742	0.6394	0.3643	0.3638	0.3842	0.3761	0.3329	0.0834	0.0811	0.0834	0.0856	0.0859	0.0059	0.0055	0.0004	0.0047	0	0.0003	0.0004	0	0.0003	0	0.0001	0.0004	0.0001	0.0004	0.0004	0	0	0	0	0.0004	0.0003	0.0004	0.0004	0.0004
716	0.9766	0.9332	0.9809	0.9735	0.9703	0.8714	0.8365	0.8672	0.8584	0.839	0.6815	0.6537	0.6871	0.6761	0.6412	0.3671	0.3666	0.387	0.3791	0.3355	0.0847	0.0821	0.0844	0.0868	0.087	0.006	0.0056	0.0003	0.0048	0	0.0003	0.0004	0	0.0003	0	0.0001	0.0004	0.0001	0.0004	0.0004	0	0	0	0	0.0004	0.0003	0.0004	0.0004	0.0004
717	0.9772	0.934	0.9817	0.9742	0.971	0.8726	0.8375	0.8683	0.8595	0.8402	0.6833	0.6556	0.6889	0.6777	0.6429	0.3697	0.3692	0.3898	0.3817	0.3379	0.0857	0.0832	0.0855	0.088	0.0881	0.0062	0.0058	0.0004	0.005	0	0.0003	0.0004	0	0.0003	0	0.0001	0.0004	0.0001	0.0004	0.0004	0	0	0	0	0.0004	0.0003	0.0004	0.0004	0.0004
718	0.9781	0.9348	0.9825	0.975	0.9718	0.8736	0.8386	0.8696	0.8607	0.8412	0.6851	0.6574	0.6909	0.6796	0.6448	0.3723	0.3717	0.3927	0.3845	0.3407	0.0869	0.0845	0.0868	0.0891	0.0892	0.0063	0.0059	0.0005	0.0051	0	0.0003	0.0004	0	0.0003	0	0.0001	0.0004	0.0001	0.0004	0.0004	0	0	0	0	0.0004	0.0003	0.0004	0.0004	0.0004
719	0.9785	0.9351	0.983	0.9755	0.9722	0.8746	0.8396	0.8705	0.8617	0.8422	0.6869	0.6591	0.6924	0.6814	0.6463	0.3749	0.3743	0.3949	0.3871	0.343	0.0881	0.0856	0.088	0.0902	0.0904	0.0065	0.0061	0.0005	0.0052	0	0.0003	0.0004	0	0.0003	0	0.0001	0.0004	0.0001	0.0004	0.0004	0	0	0	0	0.0004	0.0003	0.0004	0.0004	0.0004
720	0.9792	0.9358	0.9836	0.9762	0.9729	0.8756	0.8406	0.8716	0.8627	0.8432	0.6886	0.6607	0.6941	0.683	0.648	0.3779	0.3767	0.3978	0.3893	0.3456	0.0891	0.0866	0.089	0.0913	0.0917	0.0066	0.0062	0.0006	0.0054	0	0.0003	0.0004	0	0.0003	0	0.0001	0.0004	0.0001	0.0004	0.0004	0	0	0	0	0.0004	0.0003	0.0004	0.0004	0.0004
721	0.9799	0.9366	0.9844	0.9771	0.9737	0.8768	0.8419	0.8728	0.864	0.8446	0.6904	0.6624	0.696	0.6849	0.6499	0.3803	0.3796	0.4004	0.3923	0.3486	0.0906	0.0878	0.0903	0.093	0.093	0.0068	0.0064	0.0008	0.0056	0	0.0003	0.0004	0	0.0003	0	0.0001	0.0004	0.0001	0.0004	0.0004	0	0	0	0	0.0004	0.0003	0.0004	0.0004	0.0004
722	0.9807	0.9373	0.9852	0.9779	0.9743	0.8779	0.8429	0.8738	0.8649	0.8454	0.6923	0.6642	0.698	0.6866	0.6516	0.3831	0.3818	0.403	0.3949	0.351	0.0916	0.0891	0.0915	0.0941	0.0941	0.007	0.0065	0.0008	0.0057	0	0.0003	0.0004	0	0.0003	0	0.0001	0.0004	0.0001	0.0004	0.0004	0	0	0	0	0.0004	0.0003	0.0004	0.0004	0.0004
723	0.9814	0.938	0.9858	0.9785	0.9751	0.879	0.8438	0.875	0.8661	0.8466	0.694	0.6662	0.6997	0.6884	0.6533	0.3856	0.3849	0.4058	0.3977	0.3535	0.0928	0.0903	0.0929	0.0953	0.0954	0.0072	0.0068	0.0008	0.0059	0	0.0003	0.0004	0	0.0003	0	0.0001	0.0004	0.0001	0.0004	0.0004	0	0	0	0	0.0004	0.0003	0.0004	0.0004	0.0004
724	0.9819	0.9384	0.9863	0.9789	0.9754	0.8798	0.8448	0.876	0.867	0.8475	0.6956	0.6675	0.7012	0.6899	0.6549	0.3881	0.3869	0.4083	0.4	0.3561	0.0938	0.0914	0.0938	0.0962	0.0964	0.0073	0.0067	0.0008	0.006	0	0.0003	0.0004	0	0.0003	0	0.0001	0.0004	0.0001	0.0004	0.0004	0	0	0	0	0.0004	0.0003	0.0004	0.0004	0.0004
725	0.9824	0.939	0.9868	0.9795	0.9761	0.8809	0.8456	0.8769	0.868	0.8484	0.6974	0.6691	0.7029	0.6917	0.6566	0.3907	0.3895	0.411	0.4025	0.3584	0.0951	0.0924	0.0953	0.0976	0.0975	0.0076	0.0069	0.0011	0.0063	0	0.0003	0.0004	0	0.0003	0	0.0001	0.0004	0.0001	0.0004	0.0004	0	0	0	0	0.0004	0.0003	0.0004	0.0004	0.0004
726	0.9831	0.9397	0.9875	0.9802	0.9767	0.8821	0.8468	0.878	0.8691	0.8497	0.6992	0.6708	0.7046	0.6936	0.6583	0.3934	0.392	0.4138	0.4052	0.3609	0.0964	0.0937	0.0963	0.0991	0.099	0.0078	0.007	0.0011	0.0064	0	0.0003	0.0004	0	0.0003	0	0.0001	0.0004	0.0001	0.0004	0.0004	0	0	0	0	0.0004	0.0003	0.0004	0.0004	0.0004
727	0.9838	0.9403	0.9882	0.981	0.9773	0.8829	0.8478	0.8791	0.8701	0.8506	0.7008	0.6727	0.7063	0.695	0.66	0.3961	0.3946	0.4162	0.4079	0.3634	0.0977	0.0949	0.0975	0.1001	0.1	0.008	0.0074	0.0012	0.0065	0	0.0003	0.0004	0	0.0003	0	0.0001	0.0004	0.0001	0.0004	0.0004	0	0	0	0	0.0004	0.0003	0.0004	0.0004	0.0004
728	0.9844	0.9408	0.9887	0.9815	0.9779	0.884	0.8487	0.8802	0.8712	0.8515	0.7025	0.6743	0.7079	0.6969	0.6615	0.3989	0.3971	0.4188	0.4103	0.3659	0.099	0.0961	0.0988	0.1015	0.1014	0.0081	0.0074	0.0013	0.0067	0	0.0003	0.0004	0	0.0003	0	0.0001	0.0004	0.0001	0.0004	0.0004	0	0	0	0	0.0004	0.0003	0.0004	0.0004	0.0004
729	0.9849	0.9415	0.9896	0.982	0.9785	0.8849	0.8498	0.8812	0.8722	0.8525	0.7042	0.6756	0.7097	0.6984	0.6632	0.401	0.3997	0.4214	0.413	0.3686	0.1002	0.0976	0.0998	0.1027	0.1026	0.0084	0.0076	0.0016	0.007	0	0.0003	0.0004	0	0.0003	0	0.0001	0.0004	0.0001	0.0004	0.0004	0	0	0	0	0.0004	0.0003	0.0004	0.0004	0.0004
730	0.9856	0.9422	0.9901	0.9828	0.9792	0.8861	0.8507	0.8822	0.8733	0.8537	0.706	0.6776	0.7115	0.7003	0.6652	0.4036	0.4021	0.4242	0.4154	0.3714	0.1015	0.0986	0.1014	0.104	0.1042	0.0086	0.0078	0.0016	0.0071	0	0.0003	0.0004	0	0.0003	0	0.0001	0.0004	0.0001	0.0004	0.0004	0	0	0	0	0.0004	0.0003	0.0004	0.0004	0.0004
731	0.9862	0.9427	0.9909	0.9835	0.9798	0.887	0.8518	0.8832	0.8744	0.8548	0.7077	0.6791	0.7132	0.702	0.6666	0.4064	0.4047	0.4267	0.418	0.3735	0.1026	0.1	0.1024	0.1051	0.1053	0.0087	0.0079	0.0017	0.0073	0	0.0003	0.0004	0	0.0003	0	0.0001	0.0004	0.0001	0.0004	0.0004	0	0	0	0	0.0004	0.0003	0.0004	0.0004	0.0004
732	0.9869	0.9434	0.9916	0.9842	0.9804	0.8881	0.8526	0.8843	0.8753	0.8556	0.7093	0.681	0.7149	0.7035	0.6682	0.4088	0.4072	0.4294	0.4207	0.3762	0.1038	0.1013	0.1037	0.1066	0.1065	0.0089	0.0081	0.0018	0.0075	0	0.0003	0.0004	0	0.0003	0	0.0001	0.0004	0.0001	0.0004	0.0004	0	0	0	0	0.0004	0.0003	0.0004	0.0004	0.0004
733	0.9874	0.944	0.992	0.9848	0.981	0.8891	0.8536	0.8852	0.8763	0.8566	0.7109	0.6821	0.7164	0.7052	0.6698	0.4114	0.4096	0.4319	0.4232	0.3784	0.1049	0.1025	0.1049	0.1078	0.1079	0.0091	0.0083	0.002	0.0077	0	0.0003	0.0004	0	0.0003	0	0.0001	0.0004	0.0001	0.0004	0.0004	0	0	0	0	0.0004	0.0003	0.0004	0.0004	0.0004
734	0.988	0.9445	0.9927	0.9855	0.9815	0.89	0.8545	0.8863	0.8772	0.8575	0.7126	0.684	0.7181	0.7068	0.6716	0.414	0.412	0.4345	0.4255	0.3809	0.1064	0.1035	0.1062	0.1091	0.1092	0.0095	0.0085	0.0022	0.0078	0	0.0003	0.0004	0	0.0003	0	0.0001	0.0004	0.0001	0.0004	0.0004	0	0	0	0	0.0004	0.0003	0.0004	0.0004	0.0004
735	0.9888	0.9453	0.9936	0.9861	0.9823	0.8912	0.8557	0.8874	0.8785	0.8587	0.7145	0.6856	0.72	0.7086	0.6732	0.4166	0.4149	0.4374	0.4284	0.3837	0.108	0.1051	0.1074	0.1106	0.1106	0.0097	0.0085	0.0023	0.008	0	0.0003	0.0004	0	0.0003	0	0.0001	0.0004	0.0001	0.0004	0.0004	0	0	0	0	0.0004	0.0003	0.0004	0.0004	0.0004
736	0.9893	0.9458	0.994	0.9866	0.9827	0.892	0.8565	0.8884	0.8794	0.8596	0.716	0.6872	0.7214	0.7103	0.6746	0.4192	0.4171	0.4399	0.4307	0.3858	0.1091	0.1066	0.1087	0.1117	0.112	0.0099	0.009	0.0024	0.0083	0	0.0003	0.0004	0	0.0003	0	0.0001	0.0004	0.0001	0.0004	0.0004	0	0	0	0	0.0004	0.0003	0.0004	0.0004	0.0004
737	0.9899	0.9464	0.9945	0.9872	0.9833	0.8931	0.8574	0.8892	0.8804	0.8606	0.7176	0.6887	0.7231	0.7117	0.6762	0.4216	0.4197	0.4422	0.4334	0.3883	0.1104	0.1076	0.1103	0.1132	0.1132	0.01	0.009	0.0027	0.0084	0	0.0003	0.0004	0	0.0003	0	0.0001	0.0004	0.0001	0.0004	0.0004	0	0	0	0	0.0004	0.0003	0.0004	0.0004	0.0004
738	0.9906	0.9471	0.9952	0.9879	0.984	0.894	0.8584	0.8903	0.8814	0.8615	0.7195	0.6903	0.7249	0.7136	0.678	0.4243	0.4221	0.4452	0.436	0.3911	0.1117	0.1094	0.1114	0.1146	0.1144	0.0104	0.0094	0.0028	0.0088	0	0.0003	0.0004	0	0.0003	0	0.0001	0.0004	0.0001	0.0004	0.0004	0	0	0	0	0.0004	0.0003	0.0004	0.0004	0.0004
739	0.9911	0.9476	0.996	0.9884	0.9846	0.895	0.8595	0.8913	0.8823	0.8627	0.7209	0.6919	0.7264	0.7151	0.6795	0.4267	0.4244	0.4473	0.4385	0.3934	0.1132	0.1106	0.113	0.1161	0.1159	0.0106	0.0094	0.0029	0.0089	0	0.0003	0.0004	0	0.0003	0	0.0001	0.0004	0.0001	0.0004	0.0004	0	0	0	0	0.0004	0.0003	0.0004	0.0004	0.0004
740	0.9917	0.9481	0.9966	0.9891	0.9852	0.896	0.8604	0.8924	0.8833	0.8635	0.7225	0.6934	0.7282	0.7167	0.6812	0.4291	0.427	0.4499	0.4408	0.3958	0.1144	0.112	0.1141	0.1173	0.1174	0.0108	0.0097	0.0032	0.0091	0	0.0003	0.0004	0	0.0003	0	0.0001	0.0004	0.0001	0.0004	0.0004	0	0	0	0	0.0004	0.0003	0.0004	0.0004	0.0004
741	0.9924	0.9488	0.9972	0.9898	0.9858	0.8971	0.8614	0.8934	0.8846	0.8645	0.7244	0.6951	0.7297	0.7183	0.6828	0.4317	0.4295	0.4526	0.4434	0.3983	0.1159	0.1133	0.1155	0.1189	0.1189	0.0111	0.01	0.0033	0.0094	0	0.0003	0.0004	0	0.0003	0	0.0001	0.0004	0.0001	0.0004	0.0004	0	0	0	0	0.0004	0.0003	0.0004	0.0004	0.0004
742	0.9929	0.9493	0.9977	0.9904	0.9863	0.898	0.8622	0.8943	0.8853	0.8653	0.7258	0.6968	0.7313	0.7199	0.6846	0.4342	0.4318	0.4554	0.4458	0.4006	0.1172	0.1146	0.1169	0.1201	0.1203	0.0114	0.0102	0.0037	0.0097	0	0.0003	0.0004	0	0.0003	0	0.0001	0.0004	0.0001	0.0004	0.0004	0	0	0	0	0.0004	0.0003	0.0004	0.0004	0.0004
743	0.9937	0.95	0.9983	0.9911	0.987	0.899	0.8632	0.8953	0.8864	0.8663	0.7276	0.6983	0.7333	0.7217	0.6861	0.4371	0.4345	0.4579	0.4484	0.4032	0.1185	0.116	0.1187	0.1215	0.122	0.0116	0.0106	0.0038	0.0099	0	0.0003	0.0004	0	0.0003	0	0.0001	0.0004	0.0001	0.0004	0.0004	0	0	0	0	0.0004	0.0003	0.0004	0.0004	0.0004
744	0.9942	0.9506	0.9989	0.9916	0.9876	0.8999	0.8641	0.8962	0.8872	0.8673	0.7292	0.6999	0.7347	0.7232	0.6876	0.4395	0.4367	0.4603	0.4509	0.4057	0.1199	0.1172	0.1198	0.1232	0.1231	0.012	0.011	0.004	0.0102	0	0.0003	0.0004	0	0.0003	0	0.0001	0.0004	0.0001	0.0004	0.0004	0	0	0	0	0.0004	0.0003	0.0004	0.0004	0.0004
745	0.9947	0.9512	0.9996	0.9921	0.9881	0.9008	0.8651	0.8972	0.8883	0.8683	0.7307	0.7015	0.7364	0.7248	0.6892	0.4418	0.4393	0.4629	0.4536	0.4082	0.1216	0.1186	0.1212	0.1245	0.1246	0.0123	0.0112	0.0044	0.0105	0	0.0003	0.0004	0	0.0003	0	0.0001	0.0004	0.0001	0.0004	0.0004	0	0	0	0	0.0004	0.0003	0.0004	0.0004	0.0004
746	0.9953	0.9517	1.0002	0.9929	0.9886	0.9021	0.8662	0.8982	0.8892	0.8692	0.7324	0.7028	0.7378	0.7263	0.6907	0.4445	0.4417	0.4654	0.4559	0.4104	0.1229	0.1201	0.1225	0.1257	0.1258	0.0126	0.0114	0.0044	0.0108	0	0.0003	0.0004	0	0.0003	0	0.0001	0.0004	0.0001	0.0004	0.0004	0	0	0	0	0.0004	0.0003	0.0004	0.0004	0.0004
747	0.996	0.9523	1.0008	0.9935	0.9892	0.9031	0.8671	0.8992	0.8903	0.8702	0.734	0.7044	0.7395	0.7279	0.6924	0.447	0.4443	0.4679	0.4584	0.413	0.1242	0.1215	0.1239	0.1271	0.1275	0.0129	0.0119	0.0048	0.0111	0	0.0003	0.0004	0	0.0003	0	0.0001	0.0004	0.0001	0.0004	0.0004	0	0	0	0	0.0004	0.0003	0.0004	0.0004	0.0004
748	0.9965	0.9529	1.0014	0.994	0.9899	0.9038	0.8679	0.9001	0.8911	0.871	0.7354	0.706	0.741	0.7294	0.6939	0.4495	0.4466	0.4703	0.4608	0.4153	0.1255	0.1226	0.1253	0.1288	0.1287	0.013	0.012	0.0049	0.0114	0	0.0003	0.0004	0	0.0003	0	0.0001	0.0004	0.0001	0.0004	0.0004	0	0	0	0	0.0004	0.0003	0.0004	0.0004	0.0004
749	0.997	0.9534	1.0019	0.9946	0.9905	0.9048	0.869	0.9012	0.8922	0.872	0.737	0.7075	0.7428	0.731	0.6955	0.4518	0.4489	0.4732	0.4632	0.4178	0.1271	0.1241	0.1268	0.1299	0.1304	0.0134	0.0123	0.0051	0.0115	0	0.0003	0.0004	0	0.0003	0	0.0001	0.0004	0.0001	0.0004	0.0004	0	0	0	0	0.0004	0.0003	0.0004	0.0004	0.0004
750	0.9977	0.954	1.0024	0.9951	0.9909	0.9057	0.8696	0.902	0.893	0.873	0.7386	0.7089	0.7444	0.7325	0.697	0.4547	0.4514	0.4757	0.4655	0.4202	0.1284	0.1255	0.1284	0.1314	0.1317	0.0138	0.0128	0.0055	0.012	0	0.0003	0.0004	0	0.0003	0	0.0001	0.0004	0.0001	0.0004	0.0004	0	0	0	0	0.0004	0.0003	0.0004	0.0004	0.0004
751	0.9983	0.9546	1.0031	0.9957	0.9915	0.9067	0.8706	0.903	0.894	0.8738	0.7403	0.7105	0.7458	0.734	0.6986	0.4572	0.4539	0.4781	0.4682	0.4225	0.1297	0.1269	0.1296	0.133	0.1329	0.0142	0.0131	0.0058	0.0123	0.0001	0.0003	0.0004	0	0.0003	0	0.0001	0.0004	0.0001	0.0004	0.0004	0	0	0	0	0.0004	0.0003	0.0004	0.0004	0.0004
752	0.9988	0.9552	1.0038	0.9964	0.9921	0.9079	0.8717	0.904	0.895	0.8748	0.7418	0.712	0.7475	0.7357	0.7001	0.4596	0.456	0.4807	0.4705	0.4252	0.1312	0.1284	0.131	0.1342	0.1347	0.0146	0.0134	0.006	0.0126	0	0.0003	0.0004	0	0.0003	0	0.0001	0.0004	0.0001	0.0004	0.0004	0	0	0	0	0.0004	0.0003	0.0004	0.0004	0.0004
753	0.9994	0.9558	1.0043	0.997	0.9928	0.9085	0.8724	0.9048	0.8958	0.8756	0.7435	0.7135	0.749	0.7372	0.7015	0.4618	0.4586	0.4831	0.4732	0.4275	0.1326	0.1297	0.1327	0.1359	0.136	0.0149	0.0137	0.0062	0.0128	0	0.0003	0.0004	0	0.0003	0	0.0001	0.0004	0.0001	0.0004	0.0004	0	0	0	0	0.0004	0.0003	0.0004	0.0004	0.0004
754	1	0.9564	1.005	0.9975	0.9932	0.9095	0.8733	0.9058	0.8969	0.8765	0.745	0.7151	0.7507	0.7387	0.703	0.4644	0.4608	0.4856	0.4755	0.4298	0.1338	0.131	0.134	0.1371	0.1373	0.0152	0.014	0.0065	0.0131	0.0001	0.0003	0.0004	0	0.0003	0	0.0001	0.0004	0.0001	0.0004	0.0004	0	0	0	0	0.0004	0.0003	0.0004	0.0004	0.0004
755	1.0006	0.9569	1.0055	0.9982	0.9937	0.9105	0.8743	0.9068	0.8978	0.8775	0.7464	0.7166	0.7521	0.7403	0.7046	0.4666	0.4629	0.4879	0.4777	0.432	0.1352	0.1322	0.135	0.1386	0.1388	0.0154	0.0143	0.0068	0.0134	0.0002	0.0003	0.0004	0	0.0003	0	0.0001	0.0004	0.0001	0.0004	0.0004	0	0	0	0	0.0004	0.0003	0.0004	0.0004	0.0004
756	1.0012	0.9575	1.0062	0.9988	0.9944	0.9114	0.8752	0.9078	0.8987	0.8784	0.7478	0.7179	0.7536	0.7417	0.706	0.4691	0.4656	0.4903	0.48	0.4345	0.1367	0.134	0.1368	0.1402	0.1405	0.0159	0.0146	0.0071	0.0138	0.0003	0.0003	0.0004	0	0.0003	0	0.0001	0.0004	0.0001	0.0004	0.0004	0	0	0	0	0.0004	0.0003	0.0004	0.0004	0.0004
757	1.0016	0.958	1.0067	0.9992	0.9949	0.9123	0.8761	0.9087	0.8995	0.8792	0.7494	0.7193	0.7552	0.7434	0.7078	0.4714	0.4679	0.4928	0.4823	0.4368	0.1384	0.1357	0.1381	0.1421	0.142	0.0161	0.0149	0.0073	0.0141	0.0004	0.0003	0.0004	0	0.0003	0	0.0001	0.0004	0.0001	0.0004	0.0004	0	0	0	0	0.0004	0.0003	0.0004	0.0004	0.0004
758	1.0021	0.9585	1.0073	0.9998	0.9954	0.9131	0.8769	0.9095	0.9004	0.8802	0.7508	0.7208	0.7566	0.7446	0.7089	0.4738	0.4701	0.495	0.4847	0.439	0.1398	0.1372	0.1396	0.1431	0.1433	0.0164	0.0153	0.0076	0.0144	0.0004	0.0003	0.0004	0	0.0003	0	0.0001	0.0004	0.0001	0.0004	0.0004	0	0	0	0	0.0004	0.0003	0.0004	0.0004	0.0004
759	1.003	0.9592	1.008	1.0006	0.9962	0.9141	0.8779	0.9106	0.9014	0.8811	0.7526	0.7224	0.7583	0.7464	0.7107	0.4764	0.4727	0.4979	0.4874	0.4415	0.1412	0.1386	0.1412	0.1451	0.1452	0.017	0.0156	0.008	0.0148	0.0005	0.0003	0.0004	0	0.0003	0	0.0001	0.0004	0.0001	0.0004	0.0004	0	0	0	0	0.0004	0.0003	0.0004	0.0004	0.0004
760	1.0034	0.9597	1.0083	1.001	0.9966	0.915	0.8786	0.9114	0.9024	0.8822	0.754	0.7238	0.7597	0.7477	0.7119	0.4788	0.4749	0.5	0.4899	0.4439	0.1428	0.1401	0.1427	0.1464	0.1463	0.0172	0.0159	0.0084	0.015	0.0005	0.0003	0.0004	0	0.0003	0	0.0001	0.0004	0.0001	0.0004	0.0004	0	0	0	0	0.0004	0.0003	0.0004	0.0004	0.0004
761	1.0039	0.9602	1.009	1.0016	0.9972	0.9159	0.8797	0.9123	0.9032	0.8829	0.7553	0.7252	0.7613	0.7492	0.7133	0.4811	0.4773	0.5024	0.4918	0.4461	0.1447	0.1418	0.1442	0.1482	0.148	0.0176	0.0164	0.0085	0.0153	0.0007	0.0003	0.0004	0	0.0003	0	0.0001	0.0004	0.0001	0.0004	0.0004	0	0	0	0	0.0004	0.0003	0.0004	0.0004	0.0004
762	1.0044	0.9607	1.0095	1.002	0.9976	0.9166	0.8803	0.9131	0.904	0.8837	0.7567	0.7264	0.7626	0.7504	0.7147	0.4832	0.4793	0.5047	0.4943	0.4483	0.1456	0.1432	0.1455	0.1495	0.1496	0.018	0.0167	0.0087	0.0157	0.0008	0.0003	0.0004	0	0.0003	0	0.0001	0.0004	0.0001	0.0004	0.0004	0	0	0	0	0.0004	0.0003	0.0004	0.0004	0.0004
763	1.005	0.9613	1.0101	1.0027	0.9982	0.9176	0.8812	0.914	0.905	0.8846	0.7583	0.7281	0.7642	0.7522	0.7163	0.4857	0.4817	0.5071	0.4964	0.4507	0.1474	0.1448	0.1473	0.1512	0.151	0.0182	0.0171	0.0092	0.016	0.0009	0.0003	0.0004	0	0.0003	0	0.0001	0.0004	0.0001	0.0004	0.0004	0	0	0	0	0.0004	0.0003	0.0004	0.0004	0.0004
764	1.0056	0.9619	1.0108	1.0033	0.9988	0.9185	0.8821	0.915	0.9059	0.8855	0.76	0.7294	0.7657	0.7536	0.7177	0.4883	0.4839	0.5097	0.4989	0.4529	0.1492	0.1464	0.149	0.1531	0.1531	0.0188	0.0175	0.0096	0.0163	0.0011	0.0003	0.0004	0	0.0003	0	0.0001	0.0004	0.0001	0.0004	0.0004	0	0	0	0	0.0004	0.0003	0.0004	0.0004	0.0004
765	1.0061	0.9624	1.0113	1.0038	0.9994	0.9194	0.8828	0.9159	0.9068	0.8863	0.7613	0.7308	0.7671	0.755	0.7192	0.4905	0.4861	0.5119	0.501	0.4552	0.1507	0.1482	0.1503	0.1546	0.1545	0.019	0.0179	0.0098	0.0167	0.0012	0.0004	0.0004	0	0.0003	0	0.0001	0.0004	0.0001	0.0004	0.0004	0	0	0	0	0.0004	0.0003	0.0004	0.0004	0.0004
766	1.0066	0.9628	1.0118	1.0045	0.9999	0.9202	0.8838	0.9167	0.9076	0.8873	0.7628	0.7323	0.7686	0.7564	0.7205	0.493	0.4885	0.5143	0.5037	0.4574	0.1524	0.1498	0.152	0.1563	0.1564	0.0197	0.0182	0.0102	0.0171	0.0014	0.0003	0.0004	0	0.0003	0	0.0001	0.0004	0.0001	0.0004	0.0004	0	0	0	0	0.0004	0.0003	0.0004	0.0004	0.0004
767	1.0072	0.9634	1.0124	1.0049	1.0003	0.9211	0.8846	0.9176	0.9085	0.8883	0.7642	0.7338	0.7701	0.7579	0.7219	0.4952	0.4907	0.5166	0.5057	0.4598	0.154	0.1517	0.1536	0.158	0.1579	0.0199	0.0186	0.0105	0.0174	0.0015	0.0003	0.0004	0	0.0003	0	0.0001	0.0004	0.0001	0.0004	0.0004	0	0	0	0	0.0004	0.0003	0.0004	0.0004	0.0004
768	1.0078	0.964	1.0131	1.0056	1.0011	0.922	0.8855	0.9185	0.9094	0.8891	0.7656	0.7351	0.7716	0.7594	0.7235	0.4974	0.493	0.5192	0.5083	0.4621	0.1555	0.1533	0.1554	0.1599	0.1594	0.0202	0.0189	0.0108	0.0177	0.0017	0.0003	0.0004	0	0.0003	0	0.0001	0.0004	0.0001	0.0004	0.0004	0	0	0	0	0.0004	0.0003	0.0004	0.0004	0.0004
769	1.0084	0.9646	1.0135	1.0061	1.0016	0.9229	0.8864	0.9195	0.9104	0.8898	0.7672	0.7367	0.7732	0.761	0.725	0.5001	0.4955	0.5214	0.5106	0.4645	0.1574	0.1548	0.1572	0.1615	0.1613	0.0206	0.0194	0.0112	0.0181	0.0017	0.0003	0.0004	0	0.0003	0	0.0001	0.0004	0.0001	0.0004	0.0004	0	0	0	0	0.0004	0.0003	0.0004	0.0004	0.0004
770	1.0088	0.965	1.014	1.0066	1.0021	0.9237	0.8872	0.9203	0.9111	0.8906	0.7686	0.738	0.7745	0.7623	0.7262	0.5023	0.4976	0.524	0.5127	0.4667	0.1591	0.1565	0.1589	0.1636	0.163	0.0212	0.0199	0.0115	0.0185	0.0022	0.0003	0.0004	0	0.0003	0	0.0001	0.0004	0.0001	0.0004	0.0004	0	0	0	0	0.0004	0.0003	0.0004	0.0004	0.0004
771	1.0093	0.9654	1.0144	1.0072	1.0025	0.9244	0.8878	0.9212	0.9118	0.8914	0.7699	0.7392	0.7757	0.7636	0.7275	0.5044	0.4996	0.526	0.5149	0.4687	0.1605	0.1581	0.1604	0.1649	0.1648	0.0216	0.0202	0.0119	0.0189	0.0023	0.0004	0.0004	0	0.0003	0	0.0001	0.0004	0.0001	0.0004	0.0004	0	0	0	0	0.0004	0.0003	0.0004	0.0004	0.0004
772	1.0098	0.966	1.015	1.0077	1.003	0.9253	0.8888	0.922	0.9127	0.8922	0.7714	0.7407	0.7773	0.7649	0.729	0.5067	0.5018	0.5283	0.5172	0.4709	0.1623	0.1598	0.1624	0.1672	0.1665	0.022	0.0208	0.0122	0.0192	0.0026	0.0003	0.0004	0	0.0003	0	0.0001	0.0004	0.0001	0.0004	0.0004	0	0	0	0	0.0004	0.0003	0.0004	0.0004	0.0004
773	1.0104	0.9666	1.0156	1.0082	1.0036	0.9261	0.8896	0.9228	0.9136	0.8931	0.7728	0.742	0.7787	0.7665	0.7305	0.5092	0.5042	0.531	0.5196	0.4732	0.1643	0.1613	0.1639	0.1688	0.168	0.0224	0.0212	0.0127	0.0197	0.0027	0.0004	0.0004	0	0.0003	0	0.0001	0.0004	0.0001	0.0004	0.0004	0	0	0	0	0.0004	0.0003	0.0004	0.0004	0.0004
774	1.011	0.9673	1.0163	1.0089	1.0042	0.9271	0.8905	0.9237	0.9145	0.894	0.7743	0.7434	0.7804	0.768	0.7318	0.5116	0.5065	0.5331	0.5216	0.4756	0.1663	0.1635	0.1658	0.1704	0.1698	0.023	0.0218	0.013	0.0201	0.003	0.0003	0.0004	0	0.0003	0	0.0001	0.0004	0.0001	0.0004	0.0004	0	0	0	0	0.0004	0.0003	0.0004	0.0004	0.0004
775	1.0114	0.9675	1.0166	1.0094	1.0047	0.9278	0.8913	0.9246	0.9154	0.8948	0.7757	0.7449	0.7816	0.7693	0.7331	0.5139	0.5088	0.5357	0.5238	0.4777	0.1677	0.1648	0.1676	0.1723	0.1717	0.0233	0.0222	0.0135	0.0206	0.0031	0.0004	0.0004	0	0.0003	0	0.0001	0.0004	0.0001	0.0004	0.0004	0	0	0	0	0.0004	0.0003	0.0004	0.0004	0.0004
776	1.012	0.9682	1.0172	1.0099	1.0052	0.9287	0.8921	0.9255	0.9162	0.8957	0.7771	0.7461	0.7831	0.7708	0.7345	0.5161	0.5109	0.5379	0.5263	0.4799	0.1693	0.1666	0.1692	0.1742	0.1735	0.0238	0.0224	0.0138	0.021	0.0033	0.0004	0.0004	0	0.0003	0	0.0001	0.0004	0.0001	0.0004	0.0004	0	0	0	0	0.0004	0.0003	0.0004	0.0004	0.0004
777	1.0125	0.9687	1.0176	1.0104	1.0057	0.9295	0.8929	0.9262	0.917	0.8965	0.7785	0.7474	0.7845	0.7722	0.7359	0.5183	0.5131	0.5401	0.5284	0.4821	0.171	0.1686	0.171	0.176	0.1754	0.0241	0.023	0.0142	0.0213	0.0036	0.0003	0.0004	0	0.0003	0	0.0001	0.0004	0.0001	0.0004	0.0004	0	0	0	0	0.0004	0.0003	0.0004	0.0004	0.0004
778	1.013	0.9692	1.0182	1.0109	1.0062	0.9304	0.8937	0.9271	0.9178	0.8972	0.7799	0.7487	0.7858	0.7735	0.7372	0.5208	0.5153	0.5424	0.5307	0.4843	0.173	0.1706	0.1728	0.1779	0.1773	0.0246	0.0234	0.0146	0.0217	0.0038	0.0003	0.0004	0	0.0003	0	0.0001	0.0004	0.0001	0.0004	0.0004	0	0	0	0	0.0004	0.0003	0.0004	0.0004	0.0004
779	1.0135	0.9696	1.0187	1.0114	1.0066	0.9312	0.8944	0.928	0.9186	0.898	0.7811	0.7501	0.7871	0.7749	0.7384	0.5229	0.5174	0.5447	0.533	0.4865	0.1746	0.172	0.1747	0.1795	0.1788	0.0252	0.024	0.0151	0.0222	0.0042	0.0004	0.0004	0	0.0003	0	0.0001	0.0004	0.0001	0.0004	0.0004	0	0	0	0	0.0004	0.0003	0.0004	0.0004	0.0004
780	1.0139	0.97	1.0192	1.0119	1.0071	0.9319	0.8953	0.9288	0.9195	0.8987	0.7827	0.7516	0.7884	0.7762	0.7399	0.5253	0.5198	0.547	0.535	0.4886	0.1765	0.1737	0.1766	0.1815	0.181	0.0256	0.0244	0.0155	0.0226	0.0044	0.0005	0.0004	0	0.0003	0	0.0001	0.0004	0.0001	0.0004	0.0004	0	0	0	0	0.0004	0.0003	0.0004	0.0004	0.0004
781	1.0145	0.9707	1.0199	1.0125	1.0077	0.9328	0.8962	0.9296	0.9203	0.8996	0.784	0.7528	0.7901	0.7776	0.7411	0.5275	0.5219	0.5493	0.5374	0.4908	0.1785	0.1754	0.1784	0.1836	0.1827	0.026	0.0249	0.0159	0.023	0.0046	0.0005	0.0004	0	0.0003	0	0.0001	0.0004	0.0001	0.0004	0.0004	0	0	0	0	0.0004	0.0003	0.0004	0.0004	0.0004
782	1.015	0.9712	1.0204	1.0132	1.0081	0.9337	0.8969	0.9306	0.9212	0.9005	0.7854	0.7541	0.7914	0.7791	0.7425	0.5296	0.5241	0.5516	0.5398	0.4931	0.1802	0.1771	0.1802	0.1852	0.1844	0.0265	0.0253	0.0163	0.0234	0.005	0.0004	0.0004	0	0.0003	0	0.0001	0.0004	0.0001	0.0004	0.0004	0	0	0	0	0.0004	0.0003	0.0004	0.0004	0.0004
783	1.0155	0.9717	1.0209	1.0137	1.0087	0.9345	0.8977	0.9313	0.922	0.9012	0.7868	0.7554	0.7927	0.7804	0.7439	0.5321	0.5263	0.554	0.5417	0.4953	0.1823	0.1792	0.182	0.1872	0.1867	0.027	0.0259	0.0169	0.024	0.0053	0.0006	0.0004	0	0.0003	0	0.0001	0.0004	0.0001	0.0004	0.0004	0	0	0	0	0.0004	0.0003	0.0004	0.0004	0.0004
784	1.0159	0.9721	1.0214	1.0141	1.0092	0.9352	0.8985	0.9321	0.9228	0.902	0.7881	0.7567	0.7941	0.7816	0.7452	0.5342	0.5285	0.5563	0.544	0.4972	0.1841	0.1808	0.1839	0.1889	0.1883	0.0274	0.0265	0.0173	0.0244	0.0055	0.0005	0.0004	0	0.0003	0	0.0001	0.0004	0.0001	0.0004	0.0004	0	0	0	0	0.0004	0.0003	0.0004	0.0004	0.0004
785	1.0165	0.9726	1.0219	1.0145	1.0096	0.936	0.8992	0.9329	0.9235	0.9028	0.7899	0.7581	0.7954	0.7832	0.7464	0.5366	0.5306	0.5583	0.5464	0.4994	0.1858	0.1826	0.1858	0.1909	0.1903	0.0282	0.0269	0.0177	0.0249	0.0059	0.0008	0.0004	0	0.0003	0	0.0001	0.0004	0.0001	0.0004	0.0004	0	0	0	0	0.0004	0.0003	0.0004	0.0004	0.0004
786	1.0169	0.9732	1.0225	1.0151	1.0101	0.9368	0.9	0.9338	0.9244	0.9037	0.7909	0.7592	0.7968	0.7844	0.7478	0.5389	0.5328	0.5608	0.5485	0.5015	0.1878	0.1847	0.1879	0.193	0.1923	0.0286	0.0276	0.0182	0.0254	0.0062	0.0005	0.0004	0	0.0003	0	0.0001	0.0004	0.0001	0.0004	0.0004	0	0	0	0	0.0004	0.0003	0.0004	0.0004	0.0004
787	1.0173	0.9735	1.0229	1.0155	1.0106	0.9377	0.9008	0.9345	0.9251	0.9043	0.792	0.7607	0.7981	0.7857	0.7491	0.5411	0.5348	0.5631	0.5506	0.5039	0.1897	0.1863	0.1894	0.1946	0.1939	0.029	0.0278	0.0185	0.0258	0.0064	0.0007	0.0004	0	0.0003	0	0.0001	0.0004	0.0001	0.0004	0.0004	0	0	0	0	0.0004	0.0003	0.0004	0.0004	0.0004
788	1.0179	0.974	1.0234	1.0161	1.011	0.9384	0.9016	0.9354	0.9261	0.9051	0.7935	0.7619	0.7994	0.787	0.7503	0.5432	0.5368	0.5654	0.5527	0.5058	0.1914	0.1881	0.1916	0.1967	0.196	0.0297	0.0284	0.0192	0.0262	0.0069	0.0006	0.0004	0	0.0003	0	0.0001	0.0004	0.0001	0.0004	0.0004	0	0	0	0	0.0004	0.0003	0.0004	0.0004	0.0004
789	1.0185	0.9746	1.0241	1.0167	1.0117	0.9394	0.9025	0.9363	0.927	0.9061	0.7949	0.7631	0.8008	0.7884	0.7517	0.5455	0.5394	0.5676	0.5551	0.5082	0.1934	0.1905	0.1934	0.1991	0.1979	0.0301	0.0291	0.0197	0.0267	0.0071	0.0008	0.0004	0	0.0003	0	0.0001	0.0004	0.0001	0.0004	0.0004	0	0	0	0	0.0004	0.0003	0.0004	0.0004	0.0004
790	1.0188	0.975	1.0244	1.0171	1.0121	0.9401	0.9032	0.9371	0.9278	0.9069	0.7963	0.7645	0.8023	0.7898	0.7531	0.5477	0.5414	0.5698	0.5574	0.5104	0.1954	0.192	0.1954	0.2007	0.1998	0.0308	0.0296	0.0202	0.0275	0.0077	0.0007	0.0004	0	0.0003	0	0.0001	0.0004	0.0001	0.0004	0.0004	0	0	0	0	0.0004	0.0003	0.0004	0.0004	0.0004
791	1.0194	0.9757	1.0249	1.0177	1.0127	0.9409	0.904	0.9378	0.9285	0.9077	0.7978	0.7658	0.8034	0.7911	0.7544	0.5499	0.5434	0.572	0.5593	0.5123	0.1972	0.1943	0.1975	0.2027	0.2021	0.0313	0.0298	0.0207	0.0278	0.0078	0.0007	0.0004	0	0.0003	0	0.0001	0.0004	0.0001	0.0004	0.0004	0	0	0	0	0.0004	0.0003	0.0004	0.0004	0.0004
792	1.0199	0.9761	1.0254	1.018	1.013	0.9417	0.9048	0.9386	0.9293	0.9085	0.7988	0.7669	0.8048	0.7924	0.7555	0.552	0.5455	0.5744	0.5614	0.5145	0.1992	0.196	0.1995	0.2047	0.2039	0.0318	0.0305	0.0211	0.0283	0.0082	0.001	0.0004	0	0.0003	0	0.0001	0.0004	0.0001	0.0004	0.0004	0	0	0	0	0.0004	0.0003	0.0004	0.0004	0.0004
793	1.0204	0.9766	1.0261	1.0187	1.0136	0.9425	0.9055	0.9395	0.9302	0.9094	0.8003	0.7687	0.8061	0.7936	0.757	0.5543	0.5477	0.5764	0.5638	0.5168	0.2015	0.198	0.2016	0.2068	0.206	0.0322	0.0312	0.0218	0.0287	0.0087	0.001	0.0004	0.0001	0.0004	0	0.0001	0.0004	0.0001	0.0004	0.0004	0	0	0	0	0.0004	0.0003	0.0004	0.0004	0.0004
794	1.0209	0.9771	1.0266	1.0193	1.014	0.9433	0.9063	0.9403	0.9309	0.91	0.8015	0.7695	0.8075	0.795	0.7583	0.5565	0.5497	0.5787	0.566	0.5188	0.2032	0.2	0.2035	0.2091	0.208	0.033	0.0316	0.0222	0.0293	0.009	0.001	0.0004	0	0.0003	0	0.0001	0.0004	0.0001	0.0004	0.0004	0	0	0	0	0.0004	0.0003	0.0004	0.0004	0.0004
795	1.0214	0.9776	1.0271	1.0197	1.0145	0.9442	0.9072	0.9413	0.9318	0.911	0.8029	0.7709	0.809	0.7964	0.7594	0.5587	0.5519	0.581	0.5681	0.5209	0.2053	0.2019	0.2053	0.2108	0.2103	0.0334	0.0322	0.0226	0.0298	0.0094	0.0011	0.0004	0	0.0003	0	0.0001	0.0004	0.0001	0.0004	0.0004	0	0	0	0	0.0004	0.0003	0.0004	0.0004	0.0004
796	1.0219	0.978	1.0276	1.0202	1.015	0.9449	0.908	0.942	0.9326	0.9116	0.8045	0.7722	0.81	0.7976	0.7606	0.5609	0.5542	0.5834	0.5705	0.523	0.2075	0.2041	0.2077	0.2134	0.2124	0.0341	0.033	0.0235	0.0305	0.0098	0.0013	0.0005	0.0002	0.0003	0.0001	0.0001	0.0004	0.0001	0.0004	0.0004	0	0	0	0	0.0004	0.0003	0.0004	0.0004	0.0004
797	1.0224	0.9786	1.0282	1.0208	1.0156	0.9458	0.9086	0.9429	0.9334	0.9124	0.8055	0.7734	0.8119	0.799	0.762	0.5632	0.5562	0.5854	0.5724	0.5254	0.2098	0.2063	0.2098	0.2158	0.2145	0.0346	0.0336	0.0238	0.0309	0.0101	0.0012	0.0004	0	0.0003	0	0.0001	0.0004	0.0001	0.0004	0.0004	0	0	0	0	0.0004	0.0003	0.0004	0.0004	0.0004
798	1.0228	0.979	1.0287	1.0211	1.0161	0.9465	0.9094	0.9436	0.9343	0.9134	0.8067	0.7747	0.8128	0.8002	0.7634	0.5653	0.5584	0.5876	0.5746	0.5271	0.2114	0.2082	0.2121	0.2175	0.2164	0.0352	0.0339	0.0243	0.0314	0.0106	0.0013	0.0004	0.0002	0.0004	0.0001	0.0001	0.0004	0.0001	0.0004	0.0004	0	0	0	0	0.0004	0.0003	0.0004	0.0004	0.0004
799	1.0234	0.9796	1.0293	1.0218	1.0166	0.9474	0.9103	0.9446	0.9352	0.9142	0.8082	0.7759	0.8142	0.8015	0.7647	0.5675	0.5607	0.5901	0.5767	0.5296	0.2136	0.2104	0.2142	0.2199	0.2186	0.0361	0.0348	0.0251	0.0321	0.0111	0.0014	0.0004	0.0001	0.0003	0	0.0001	0.0004	0.0001	0.0004	0.0004	0	0	0	0	0.0004	0.0003	0.0004	0.0004	0.0004
800	1.0239	0.9801	1.0298	1.0223	1.017	0.9482	0.911	0.9452	0.9358	0.9148	0.8095	0.7772	0.8155	0.8029	0.766	0.5696	0.5624	0.5922	0.5786	0.5314	0.216	0.2125	0.2162	0.2221	0.2209	0.0364	0.0353	0.0256	0.0325	0.0114	0.0016	0.0004	0.0002	0.0005	0.0001	0.0001	0.0004	0.0001	0.0004	0.0004	0	0	0	0	0.0004	0.0003	0.0004	0.0004	0.0004
801	1.0244	0.9805	1.0303	1.0227	1.0176	0.949	0.9118	0.9462	0.9367	0.9157	0.8107	0.7784	0.8169	0.8042	0.7674	0.5718	0.5644	0.5942	0.581	0.5336	0.2179	0.2147	0.2187	0.2245	0.2231	0.0371	0.0359	0.026	0.0333	0.0119	0.0015	0.0004	0.0001	0.0003	0	0.0001	0.0004	0.0001	0.0004	0.0004	0	0	0	0	0.0004	0.0003	0.0004	0.0004	0.0004
802	1.0249	0.981	1.0308	1.0234	1.0179	0.9498	0.9126	0.947	0.9376	0.9165	0.812	0.7799	0.8181	0.8054	0.7685	0.5739	0.5668	0.5965	0.5831	0.5357	0.2203	0.2169	0.2208	0.2267	0.2255	0.0376	0.0365	0.0267	0.0338	0.0124	0.0017	0.0005	0.0004	0.0005	0.0002	0.0001	0.0004	0.0001	0.0004	0.0004	0	0	0	0	0.0004	0.0003	0.0004	0.0004	0.0004
803	1.0255	0.9816	1.0314	1.024	1.0186	0.9507	0.9134	0.9479	0.9385	0.9174	0.8135	0.781	0.8196	0.8068	0.7698	0.5763	0.569	0.599	0.5853	0.5381	0.2228	0.2192	0.2229	0.2292	0.228	0.0387	0.0373	0.0275	0.0346	0.013	0.0016	0.0004	0.0001	0.0003	0	0.0001	0.0004	0.0001	0.0004	0.0004	0	0	0	0	0.0004	0.0003	0.0004	0.0004	0.0004
804	1.026	0.982	1.032	1.0244	1.019	0.9514	0.9142	0.9486	0.9392	0.918	0.8147	0.7821	0.8209	0.8081	0.771	0.5781	0.5709	0.601	0.5873	0.54	0.2247	0.2212	0.2252	0.2314	0.23	0.039	0.0377	0.0278	0.035	0.0135	0.0017	0.0004	0.0002	0.0003	0.0001	0.0001	0.0004	0.0001	0.0004	0.0004	0	0	0	0	0.0004	0.0003	0.0004	0.0004	0.0004
805	1.0265	0.9826	1.0325	1.0249	1.0195	0.9522	0.915	0.9494	0.94	0.9187	0.8161	0.7835	0.8221	0.8093	0.7723	0.5804	0.573	0.6032	0.5895	0.542	0.2268	0.2238	0.2277	0.2336	0.2323	0.0398	0.0386	0.0285	0.0356	0.0139	0.0018	0.0004	0.0003	0.0003	0.0001	0.0001	0.0004	0.0001	0.0004	0.0004	0	0	0	0	0.0004	0.0003	0.0004	0.0004	0.0004
806	1.0271	0.9834	1.0333	1.0258	1.0203	0.9534	0.9161	0.9505	0.941	0.9198	0.8173	0.7848	0.8236	0.8107	0.7739	0.5831	0.5752	0.6056	0.5918	0.5444	0.2293	0.2259	0.2302	0.2365	0.2347	0.0403	0.0392	0.0291	0.0362	0.0143	0.0019	0.0004	0.0003	0.0004	0.0001	0.0001	0.0004	0.0001	0.0004	0.0004	0	0	0	0	0.0004	0.0003	0.0004	0.0004	0.0004
807	1.0278	0.9838	1.0339	1.0263	1.0209	0.954	0.9167	0.9514	0.942	0.9208	0.8188	0.7863	0.8249	0.8121	0.7752	0.585	0.5775	0.6079	0.5943	0.5465	0.2315	0.2282	0.2324	0.2386	0.2372	0.041	0.04	0.0298	0.0368	0.015	0.002	0.0004	0.0004	0.0004	0.0002	0.0001	0.0004	0.0001	0.0004	0.0004	0	0	0	0	0.0004	0.0003	0.0004	0.0004	0.0004
808	1.0282	0.9843	1.0344	1.0268	1.0213	0.955	0.9176	0.9522	0.9427	0.9215	0.82	0.7873	0.8263	0.8133	0.7765	0.5874	0.5798	0.6103	0.5962	0.5489	0.2341	0.2306	0.2348	0.2411	0.2396	0.0418	0.0403	0.0306	0.0375	0.0154	0.0021	0.0004	0.0002	0.0004	0.0001	0.0001	0.0004	0.0001	0.0004	0.0004	0	0	0	0	0.0004	0.0003	0.0004	0.0004	0.0004
809	1.0287	0.985	1.035	1.0274	1.022	0.9558	0.9184	0.9529	0.9436	0.9224	0.8215	0.7887	0.8275	0.8146	0.7778	0.5894	0.5814	0.6123	0.5983	0.5509	0.2363	0.233	0.2371	0.2436	0.2422	0.0423	0.0411	0.0312	0.038	0.016	0.0022	0.0004	0.0004	0.0005	0.0001	0.0001	0.0004	0.0001	0.0004	0.0004	0	0	0	0	0.0004	0.0003	0.0004	0.0004	0.0004
810	1.0293	0.9855	1.0355	1.0279	1.0225	0.9565	0.9191	0.9539	0.9445	0.9233	0.8229	0.7898	0.8288	0.816	0.779	0.5914	0.5836	0.6145	0.6005	0.5528	0.2386	0.2353	0.2398	0.2459	0.2449	0.043	0.0417	0.0318	0.0389	0.0164	0.0024	0.0005	0.0005	0.0006	0.0002	0.0001	0.0004	0.0001	0.0004	0.0004	0	0	0	0	0.0004	0.0003	0.0004	0.0004	0.0004
811	1.0299	0.986	1.0361	1.0286	1.023	0.9573	0.9199	0.9547	0.9453	0.924	0.824	0.7911	0.8302	0.8172	0.7803	0.5935	0.5858	0.6166	0.6024	0.5548	0.2411	0.2376	0.2421	0.2487	0.247	0.0438	0.0428	0.0322	0.0395	0.017	0.0024	0.0004	0.0004	0.0006	0.0002	0.0001	0.0004	0.0001	0.0004	0.0004	0	0	0	0	0.0004	0.0003	0.0004	0.0004	0.0004
812	1.0304	0.9865	1.0367	1.0291	1.0235	0.9582	0.9209	0.9555	0.9461	0.9248	0.8251	0.7924	0.8315	0.8185	0.7815	0.5959	0.588	0.6191	0.6046	0.5569	0.2436	0.2406	0.2446	0.2512	0.2493	0.0445	0.0434	0.0333	0.0402	0.0178	0.0023	0.0004	0.0004	0.0005	0.0001	0.0001	0.0004	0.0001	0.0004	0.0004	0	0	0	0	0.0004	0.0003	0.0004	0.0004	0.0004
813	1.031	0.9871	1.0372	1.0297	1.0242	0.9591	0.9216	0.9564	0.947	0.9257	0.8265	0.7935	0.8329	0.8199	0.783	0.5979	0.59	0.6211	0.6067	0.5591	0.2461	0.2426	0.2471	0.2536	0.2524	0.0452	0.044	0.0337	0.0406	0.0183	0.0026	0.0006	0.0006	0.0007	0.0003	0.0001	0.0004	0.0001	0.0004	0.0004	0	0	0	0	0.0004	0.0003	0.0004	0.0004	0.0004
814	1.0315	0.9876	1.0379	1.0303	1.0247	0.96	0.9224	0.9572	0.9478	0.9266	0.8278	0.7948	0.8341	0.821	0.7842	0.6002	0.5921	0.6233	0.6091	0.5613	0.2483	0.2448	0.2495	0.2561	0.2551	0.0458	0.0446	0.0346	0.0415	0.0189	0.0025	0.0004	0.0005	0.0006	0.0002	0.0001	0.0004	0.0001	0.0004	0.0004	0	0	0	0	0.0004	0.0003	0.0004	0.0004	0.0004
815	1.0318	0.988	1.0383	1.0306	1.025	0.9606	0.923	0.9579	0.9484	0.9271	0.829	0.7959	0.8356	0.8221	0.7851	0.602	0.594	0.6252	0.6111	0.5631	0.2511	0.2471	0.2518	0.2584	0.2569	0.0467	0.0455	0.0351	0.042	0.0193	0.0029	0.0007	0.0007	0.0008	0.0004	0.0001	0.0004	0.0001	0.0004	0.0004	0	0	0	0	0.0004	0.0003	0.0004	0.0004	0.0004
816	1.0324	0.9884	1.0388	1.0311	1.0254	0.9614	0.9239	0.9587	0.9493	0.9279	0.8302	0.797	0.8365	0.8234	0.7863	0.6043	0.5961	0.6275	0.6132	0.5651	0.2536	0.2498	0.2544	0.2612	0.2597	0.0476	0.0463	0.0361	0.0429	0.02	0.0031	0.0009	0.0009	0.0009	0.0005	0.0001	0.0004	0.0001	0.0004	0.0004	0	0	0	0	0.0004	0.0003	0.0004	0.0004	0.0004
817	1.0329	0.989	1.0393	1.0316	1.026	0.9621	0.9246	0.9596	0.9501	0.9287	0.8315	0.7983	0.8378	0.8246	0.7878	0.6063	0.5982	0.6294	0.615	0.567	0.256	0.2521	0.2569	0.2638	0.2621	0.048	0.0468	0.0365	0.0435	0.0206	0.0031	0.0007	0.0008	0.0009	0.0004	0.0001	0.0004	0.0001	0.0004	0.0004	0	0	0	0	0.0004	0.0003	0.0004	0.0004	0.0004
818	1.0333	0.9894	1.0398	1.0322	1.0264	0.9629	0.9252	0.9603	0.9508	0.9294	0.8329	0.7994	0.8395	0.8259	0.7888	0.6083	0.5999	0.6316	0.617	0.5689	0.2584	0.2549	0.2594	0.2664	0.2646	0.049	0.0474	0.0374	0.0442	0.021	0.0032	0.0008	0.0008	0.0009	0.0005	0.0001	0.0004	0.0001	0.0004	0.0004	0	0	0	0	0.0004	0.0003	0.0004	0.0004	0.0004
819	1.0341	0.9901	1.0405	1.033	1.0271	0.9639	0.9262	0.9613	0.9518	0.9306	0.8341	0.8009	0.8405	0.8272	0.7903	0.6103	0.602	0.6338	0.6193	0.5712	0.2612	0.2576	0.2624	0.269	0.2676	0.0497	0.0484	0.038	0.0453	0.0216	0.0035	0.001	0.0011	0.0012	0.0007	0.0001	0.0004	0.0001	0.0004	0.0004	0	0	0	0	0.0004	0.0003	0.0004	0.0004	0.0004
[truncated: 1,987 more rows]
[truncated: 6 more columns]

## Sheet: Desulfovibrio desulfuricans
DATA(x)	A1_DATA(y)	B1_DATA(y)	C1_DATA(y)	D1_DATA(y)	E1_DATA(y)	F1_DATA(y)	G1_DATA(y)	H1_DATA(y)	A2_DATA(y)	B2_DATA(y)	C2_DATA(y)	D2_DATA(y)	E2_DATA(y)	F2_DATA(y)	G2_DATA(y)	H2_DATA(y)	A3_DATA(y)	B3_DATA(y)	C3_DATA(y)	D3_DATA(y)	E3_DATA(y)	F3_DATA(y)	G3_DATA(y)	H3_DATA(y)	A4_DATA(y)	B4_DATA(y)	C4_DATA(y)	D4_DATA(y)	E4_DATA(y)	F4_DATA(y)	G4_DATA(y)	H4_DATA(y)	A5_DATA(y)	B5_DATA(y)	C5_DATA(y)	D5_DATA(y)	E5_DATA(y)	F5_DATA(y)	G5_DATA(y)	H5_DATA(y)	A6_DATA(y)	B6_DATA(y)	C6_DATA(y)	D6_DATA(y)	E6_DATA(y)	F6_DATA(y)	G6_DATA(y)	H6_DATA(y)	A7_DATA(y)
[truncated: 1,601 more rows]
[truncated: 10 more columns]

[truncated: 2 more sheets: carbenicillin against E. coli, gentamycin against S. aureus.]
